# Supplementary material for: Comparative Phosphoproteomic Profiling of Type III Adenylyl Cyclase Knockout and Control, Male, and Female Mice
Source: Front Cell Neurosci. 2019 Feb 13;13:34. doi: 10.3389/fncel.2019.00034 (PMC6381875; doi:10.3389/fncel.2019.00034)
Supplement: Supplementary file 1 [file Table_1.XLSX]

## Sheet: Sheet1
Supplemental Data 1: Label-free quantification of whole dataset
Begin position means the position of amino acid before this peptide
Uniport ID	Protein Gene	Protein Description	Begin Position	DB peptide	Modification	Sum F1 KO/Conc.	Sum F2 KO/Conc.	Sum F3 KO/Conc.	Sum F4 KO/Conc.	Sum M1 KO/Conc.	Sum M2 KO/Conc.	Sum M3 KO/Conc.	Sum M4 KO/Conc.	Sum F1 WT/Conc.	Sum F2 WT/Conc.	Sum F3 WT/Conc.	Sum F4 WT/Conc.	Sum M1 WT/Conc.	Sum M2 WT/Conc.	Sum M3 WT/Conc.	Sum M4 WT/Conc.	Detected times in KO	Detected times in WT	Detected times in F	Detected times in M	F-test (Peak area of KO vs WT)	T-test (Peak area of KO vs WT)	F-test (Peak area of F vs M)	T-test (Peak area of F vs M)
Q8R2R3	Aagab	Alpha- and gamma-adaptin-binding protein p34	196	VASAESCHSEQQEPSPTAER	monophos-(196)VASAESCHSEQQEPSPTAER	54131.2		130166						68310.9		168636						2	2	4	0	0.82573	0.716397	#DIV/0!	#DIV/0!
Q8R2R3	Aagab	Alpha- and gamma-adaptin-binding protein p34	294	AFWMAIGGDRDEIEGLSSDDEH	diphos-(294)AFWMAIGGDRDEIEGLSSDDEH			458909		528016			434159			536316	479836				1.06467e+06	3	3	3	3	0.0444667	0.358868	0.0273305	0.448248
Q8R2R3	Aagab	Alpha- and gamma-adaptin-binding protein p34	294	AFWMAIGGDRDEIEGLSSDDEH	monophos-(294)AFWMAIGGDRDEIEGLSSDDEH			263840		105690						199756						2	1	2	1	#DIV/0!	#DIV/0!	#DIV/0!	#DIV/0!
Q3UHJ0	Aak1	AP2-associated protein kinase 1	8	REQGSSGLGSGSSGGGGSSSGLGSGYIGR	diphos-(8)REQGSSGLGSGSSGGGGSSSGLGSGYIGR			154828														1	0	1	0	#DIV/0!	#DIV/0!	#DIV/0!	#DIV/0!
Q3UHJ0	Aak1	AP2-associated protein kinase 1	8	REQGSSGLGSGSSGGGGSSSGLGSGYIGR	monophos-(8)REQGSSGLGSGSSGGGGSSSGLGSGYIGR	292001	766873	1.66366e+06		555154		425247		868625	826792	340244		114503			314719	5	5	6	4	0.370925	0.412206	0.139596	0.132131
Q3UHJ0	Aak1	AP2-associated protein kinase 1	600	VQTTPPPTIQGQK	monophos-(600)VQTTPPPTIQGQK	306673	594022	539546		753157	297733	817052		684560	833323	532152		676960	595894	805343	529624	6	7	6	7	0.19022	0.259356	0.932313	0.577075
Q3UHJ0	Aak1	AP2-associated protein kinase 1	613	VGSLTPPSSPKTQR	diphos-(613)VGSLTPPSSPKTQR	1.09083e+07	2.22413e+07	3.85448e+07	4.03556e+07	3.30763e+07	9.06444e+06	7.43008e+07	3.27753e+07	2.13461e+07	4.74285e+07	2.63244e+07	3.63525e+07	2.02174e+07	1.45339e+07	2.73483e+07	4.52892e+07	8	8	8	8	0.177758	0.74425	0.189488	0.849017
Q3UHJ0	Aak1	AP2-associated protein kinase 1	613	VGSLTPPSSPK	monophos-(613)VGSLTPPSSPK	302107	458751			121745			369911	1.60814e+06	1.06285e+06	654892	833803		157830	528181	934729	4	7	6	5	0.0838747	0.0602672	0.513641	0.14725
Q3UHJ0	Aak1	AP2-associated protein kinase 1	649	STQLLQAAAAEASLNK	monophos-(649)STQLLQAAAAEASLNK	259688	764812	646126		827918	636701	1.18774e+06	571358	352296	682854	650074		520696	528857	1.03934e+06	793933	7	7	6	8	0.571701	0.736471	0.685442	0.12623
Q3UHJ0	Aak1	AP2-associated protein kinase 1	678	TSQQNVSNASEGSTWNPFDDDNFSK	monophos-(678)TSQQNVSNASEGSTWNPFDDDNFSK	74276.3	79689.4							151752	120442							2	2	4	0	0.217979	0.0652377	#DIV/0!	#DIV/0!
Q3UHJ0	Aak1	AP2-associated protein kinase 1	725	LGGSAESLIPGFQPTQGDAFTTPSFSAGTAEK	monophos-(725)LGGSAESLIPGFQPTQGDAFTTPSFSAGTAEK						42093					406244						1	1	1	1	#DIV/0!	#DIV/0!	#DIV/0!	#DIV/0!
Q3UHJ0	Aak1	AP2-associated protein kinase 1	933	NSSGSSESSLPNLAR	monophos-(933)NSSGSSESSLPNLAR	146284	332632	440982			90806.7			379647	547981	406646		141751	195746			4	5	6	3	0.979567	0.482354	0.277649	0.0254435
Q3THG9	Aarsd1	Alanyl-tRNA editing protein Aarsd1	75	GAQADHFTESPLSPGSQVQVR	monophos-(75)GAQADHFTESPLSPGSQVQVR	171668	159527	474921	226162	268272	165280	439078	358519	326426	198329	478555	278731	204824	188119	310147	349682	8	8	8	8	0.515032	0.876789	0.463963	0.947379
Q3THG9	Aarsd1	Alanyl-tRNA editing protein Aarsd1	171	ELSLDDPEVEQVR	monophos-(171)ELSLDDPEVEQVR	110338	3.43169e+06	1.1389e+06		854753	649490	1.35581e+07	3.0609e+06	2.98595e+06	132774	2.28463e+06	5.86049e+06	638922	398372	4.13588e+06	3.25078e+06	7	8	7	8	0.0416418	0.68876	0.0834878	0.576065
Q3THG9	Aarsd1	Alanyl-tRNA editing protein Aarsd1	393	RAEAQALLQDYVSTQSAEE	monophos-(393)RAEAQALLQDYVSTQSAEE				202729		118188	1.9193e+06			323830		310743	152282			192832	3	4	3	4	0.00214199	0.482728	0.0112787	0.525887
Q3THG9	Aarsd1	Alanyl-tRNA editing protein Aarsd1	394	AEAQALLQDYVSTQSAEE	monophos-(394)AEAQALLQDYVSTQSAEE									151836								0	1	1	0	#DIV/0!	#DIV/0!	#DIV/0!	#DIV/0!
Q80YE4	Aatk	Serine/threonine-protein kinase LMTK1	402	GTTELEEEFER	monophos-(402)GTTELEEEFER													312660				0	1	0	1	#DIV/0!	#DIV/0!	#DIV/0!	#DIV/0!
Q80YE4	Aatk	Serine/threonine-protein kinase LMTK1	1132	SPLCLALPGHPGALEGRPEEDEDTEDSEESDEELR	diphos-(1132)SPLCLALPGHPGALEGRPEEDEDTEDSEESDEELR													116180				0	1	0	1	#DIV/0!	#DIV/0!	#DIV/0!	#DIV/0!
Q80YE4	Aatk	Serine/threonine-protein kinase LMTK1	1167	CYSVQEPSEDSEEEPPAVPVVVAESQSAR	diphos-(1167)CYSVQEPSEDSEEEPPAVPVVVAESQSAR					141748												1	0	0	1	#DIV/0!	#DIV/0!	#DIV/0!	#DIV/0!
P21447	Abcb1a	Multidrug resistance protein 1A	652	DSGSSLIR	monophos-(652)DSGSSLIR					76718												1	0	0	1	#DIV/0!	#DIV/0!	#DIV/0!	#DIV/0!
Q6P542	Abcf1	ATP-binding cassette sub-family F member 1	98	LKQLSVPASDEEDEVPAPIPR	diphos-(98)LKQLSVPASDEEDEVPAPIPR		1.04464e+06	1.01253e+06	580522	776385		468142	696660			903554	1.20579e+06	446280	670711	280332	670616	6	6	5	7	0.457297	0.691594	0.523333	0.0095733
Q6P542	Abcf1	ATP-binding cassette sub-family F member 1	100	QLSVPASDEEDEVPAPIPR	monophos-(100)QLSVPASDEEDEVPAPIPR	294850	509313	790242	493332	263581	223110	692568	592118	671360	911523	545976	585098	208217		475465	523329	8	7	8	7	0.946331	0.486232	0.949867	0.10235
Q6P542	Abcf1	ATP-binding cassette sub-family F member 1	123	AKGGNVFEALIQDDSEEEEEEEENR	monophos-(123)AKGGNVFEALIQDDSEEEEEEEENR	17066	301223	2.8473e+06	538811	416041	452649	1.14871e+06	1.27109e+06	789274	793856	965585	1.02311e+06	489871	1.08281e+06	616554	1.43551e+06	8	8	8	8	0.00873449	0.941253	0.074179	0.894276
Q8CBW3	Abi1	Abl interactor 1	173	TNPPTQKPPSPPVSGR	monophos-(173)TNPPTQKPPSPPVSGR							1.62976e+06	1.26804e+06							3.54973e+06		2	1	0	3	#DIV/0!	#DIV/0!	#DIV/0!	#DIV/0!
Q8CBW3	Abi1	Abl interactor 1	293	HNSTTSSTSSGGYRR	monophos-(293)HNSTTSSTSSGGYRR						20408.4											1	0	0	1	#DIV/0!	#DIV/0!	#DIV/0!	#DIV/0!
P62484	Abi2	Abl interactor 2	167	TTPPTQKPPSPPMSGK	diphos-(167)TTPPTQKPPSPPMSGK			308890														1	0	1	0	#DIV/0!	#DIV/0!	#DIV/0!	#DIV/0!
P62484	Abi2	Abl interactor 2	167	TTPPTQKPPSPPMSGK	monophos-(167)TTPPTQKPPSPPMSGK							2.63348e+06				5.35352e+06						1	1	1	1	#DIV/0!	#DIV/0!	#DIV/0!	#DIV/0!
P62484	Abi2	Abl interactor 2	213	NMAPSQQSPVR	monophos-(213)NMAPSQQSPVR	634079	413114	771147	745475	277211	150301	1.23957e+06	553260	493453	402497	802436			148963	760234	853749	8	6	7	7	0.674543	0.903008	0.0532765	0.816245
P62484	Abi2	Abl interactor 2	292	HTPPTIGGSLPYR	monophos-(292)HTPPTIGGSLPYR		1.11839e+06	397894	125839	346937	172074	733378	155502						118687		823741	7	2	3	6	0.446286	0.912468	0.317837	0.58042
Q8K4G5	Ablim1	Actin-binding LIM protein 1	53	RGTVIHLVYLYSAGCGPPELR	diphos-(53)RGTVIHLVYLYSAGCGPPELR									1.01756e+06								0	1	1	0	#DIV/0!	#DIV/0!	#DIV/0!	#DIV/0!
Q8K4G5	Ablim1	Actin-binding LIM protein 1	394	TSSESIYSRPGSSIPGSPGHTIYAK	diphos-(394)TSSESIYSRPGSSIPGSPGHTIYAK		154153															1	0	1	0	#DIV/0!	#DIV/0!	#DIV/0!	#DIV/0!
Q8K4G5	Ablim1	Actin-binding LIM protein 1	472	TLSPTPSAEGYQDVR	diphos-(472)TLSPTPSAEGYQDVR		121725					330572										2	0	1	1	#DIV/0!	#DIV/0!	#DIV/0!	#DIV/0!
Q8K4G5	Ablim1	Actin-binding LIM protein 1	472	TLSPTPSAEGYQDVR	monophos-(472)TLSPTPSAEGYQDVR	173889	464531	451806	230458	187267	136514	355009		428327	590364		347073	200800	140049	311866	414285	7	7	7	7	0.819975	0.435897	0.533174	0.0739247
Q8K4G5	Ablim1	Actin-binding LIM protein 1	493	STSQGSINSPVYSR	diphos-(493)STSQGSINSPVYSR					140085									82201.2			1	1	0	2	#DIV/0!	#DIV/0!	#DIV/0!	#DIV/0!
Q8K4G5	Ablim1	Actin-binding LIM protein 1	493	STSQGSINSPVYSR	monophos-(493)STSQGSINSPVYSR	372040	405892	812772		200716				966699				344902				4	2	4	2	0.377118	0.487428	0.493203	0.180894
Q8K4G5	Ablim1	Actin-binding LIM protein 1	669	SSGREEDEEELLR	monophos-(669)SSGREEDEEELLR					103799												1	0	0	1	#DIV/0!	#DIV/0!	#DIV/0!	#DIV/0!
Q8K4G5	Ablim1	Actin-binding LIM protein 1	735	TSSLPGYGK	monophos-(735)TSSLPGYGK		161761															1	0	1	0	#DIV/0!	#DIV/0!	#DIV/0!	#DIV/0!
Q8K4G5	Ablim1	Actin-binding LIM protein 1	786	GVSMPNMLEPK	monophos-(786)GVSMPNMLEPK		131515	343586	332894		112181	602259	252901						74377.3	279818	361315	6	3	3	6	0.906329	0.648861	0.611512	0.930086
Q8BL65	Ablim2	Actin-binding LIM protein 2	277	TSSESIVSVPASSTSGSPSR	diphos-(277)TSSESIVSVPASSTSGSPSR					88624.1												1	0	0	1	#DIV/0!	#DIV/0!	#DIV/0!	#DIV/0!
Q8BL65	Ablim2	Actin-binding LIM protein 2	474	TNSPDLDSQSLSLSSGTDQEPLQR	monophos-(474)TNSPDLDSQSLSLSSGTDQEPLQR	139744		349887														2	0	2	0	#DIV/0!	#DIV/0!	#DIV/0!	#DIV/0!
Q5SSL4	Abr	Active breakpoint cluster region-related protein	38	GPPEGSETMPYIDESPTMSPQLSAR	diphos-(38)GPPEGSETMPYIDESPTMSPQLSAR			780717														1	0	1	0	#DIV/0!	#DIV/0!	#DIV/0!	#DIV/0!
Q5SWU9	Acaca	Acetyl-CoA carboxylase 1	18	FIIGSVSEDNSEDEISNLVK	diphos-(18)FIIGSVSEDNSEDEISNLVK		112244	201236					159210		103259			103877				3	2	3	2	0.0138856	0.170441	0.909825	0.881192
Q5SWU9	Acaca	Acetyl-CoA carboxylase 1	18	FIIGSVSEDNSEDEISNLVK	monophos-(18)FIIGSVSEDNSEDEISNLVK									68048.7	114941			78535.9				0	3	2	1	#DIV/0!	#DIV/0!	#DIV/0!	#DIV/0!
Q5SWU9	Acaca	Acetyl-CoA carboxylase 1	75	SSMSGLHLVK	monophos-(75)SSMSGLHLVK													91739.8				0	1	0	1	#DIV/0!	#DIV/0!	#DIV/0!	#DIV/0!
Q8JZN5	Acad9	Acyl-CoA dehydrogenase family member 9, mitochondrial	481	TVDLGLTGDLGVVHPSLGDSANK	monophos-(481)TVDLGLTGDLGVVHPSLGDSANK			508855		170858			256247			379385						3	1	2	2	#DIV/0!	#DIV/0!	0.742356	0.0969471
Q8QZT1	Acat1	Acetyl-CoA acetyltransferase, mitochondrial	128	AIMMASQSLMCGHQDVMVAGGMESMSNVPYVMSRGATPYGGVK	monophos-(128)AIMMASQSLMCGHQDVMVAGGMESMSNVPYVMSRGATPYGGVK										45518.5							0	1	1	0	#DIV/0!	#DIV/0!	#DIV/0!	#DIV/0!
Q8CAY6	Acat2	Acetyl-CoA acetyltransferase, cytosolic	223	HGSNLEAMGKLKPYFLTDGTGTVTPANASGMNDGAAAVVLMK	diphos-(223)HGSNLEAMGKLKPYFLTDGTGTVTPANASGMNDGAAAVVLMK		378373															1	0	1	0	#DIV/0!	#DIV/0!	#DIV/0!	#DIV/0!
Q8CAY6	Acat2	Acetyl-CoA acetyltransferase, cytosolic	223	HGSNLEAMGKLKPYFLTDGTGTVTPANASGMNDGAAAVVLMK	monophos-(223)HGSNLEAMGKLKPYFLTDGTGTVTPANASGMNDGAAAVVLMK		66763.9						2.34021e+07		119321						5.1629e+07	2	2	2	2	0.541598	0.666615	0.00237069	0.229591
Q8BMP6	Acbd3	Golgi resident protein GCP60	114	QVLLGPYNPDTSPEVGFFDVLGNDR	monophos-(114)QVLLGPYNPDTSPEVGFFDVLGNDR			135925								60294.4		94753.3				1	2	2	1	#DIV/0!	#DIV/0!	#DIV/0!	#DIV/0!
P09470	Ace	Angiotensin-converting enzyme	1299	GPQFGSEVELR	monophos-(1299)GPQFGSEVELR	324661			645387		181647	874480		395115	345209		609079		132402	655424	621413	4	6	5	5	0.386006	0.780271	0.174065	0.859211
Q8VHQ9	Acot11	Acyl-coenzyme A thioesterase 11	24	SISHPESGDPPTMAEGEGYR	monophos-(24)SISHPESGDPPTMAEGEGYR		153152	406955							371847							2	1	3	0	#DIV/0!	#DIV/0!	#DIV/0!	#DIV/0!
Q99PU5	Acsbg1	Long-chain-fatty-acid--CoA ligase ACSBG1	67	AASLDGAEEALWTTR	monophos-(67)AASLDGAEEALWTTR		117714								292829							1	1	2	0	#DIV/0!	#DIV/0!	#DIV/0!	#DIV/0!
Q99PU5	Acsbg1	Long-chain-fatty-acid--CoA ligase ACSBG1	466	LYAGYGLSESTGPHFMSSPYNYRLYSSGR	diphos-(466)LYAGYGLSESTGPHFMSSPYNYRLYSSGR												302768					0	1	1	0	#DIV/0!	#DIV/0!	#DIV/0!	#DIV/0!
Q80W40	Acsm4	Acyl-coenzyme A synthetase ACSM4, mitochondrial	470	ADDVIISSGYRIGPFEVESALIEHPAVVESAVVSSPDPIR	diphos-(470)ADDVIISSGYRIGPFEVESALIEHPAVVESAVVSSPDPIR													113195				0	1	0	1	#DIV/0!	#DIV/0!	#DIV/0!	#DIV/0!
Q9QXG4	Acss2	Acetyl-coenzyme A synthetase, cytoplasmic	25	VRGWSPPPEVR	monophos-(25)VRGWSPPPEVR	657821	1.34963e+06	1.19405e+06	1.25984e+06		226580	1.13818e+06	995590	1.34885e+06	2.11376e+06	1.20823e+06	1.70737e+06	241129	269329	909182	1.45944e+06	7	8	8	7	0.2436	0.535436	0.657637	0.024214
Q9QXG4	Acss2	Acetyl-coenzyme A synthetase, cytoplasmic	255	AELGMNDSPSQSPPVK	diphos-(255)AELGMNDSPSQSPPVK					137045												1	0	0	1	#DIV/0!	#DIV/0!	#DIV/0!	#DIV/0!
Q9QXG4	Acss2	Acetyl-coenzyme A synthetase, cytoplasmic	255	AELGMNDSPSQSPPVK	monophos-(255)AELGMNDSPSQSPPVK		206192							223542		243760			82850.2			1	3	3	1	#DIV/0!	#DIV/0!	#DIV/0!	#DIV/0!
P68134	Acta1	Actin, alpha skeletal muscle	198	GYSFVTTAER	monophos-(198)GYSFVTTAER		151022															1	0	1	0	#DIV/0!	#DIV/0!	#DIV/0!	#DIV/0!
P68134	Acta1	Actin, alpha skeletal muscle	240	SYELPDGQVITIGNER	monophos-(240)SYELPDGQVITIGNER	350800	402474	1.38333e+06	525759	833492	328108	988196	1.13654e+06	500289	289295	1.049e+06	721947	289057	239050	799346	1.70238e+06	8	8	8	8	0.583653	0.845445	0.488651	0.549651
P62737	Acta2	Actin, aortic smooth muscle	198	GYSFVTTAER	monophos-(198)GYSFVTTAER		151022															1	0	1	0	#DIV/0!	#DIV/0!	#DIV/0!	#DIV/0!
P62737	Acta2	Actin, aortic smooth muscle	240	SYELPDGQVITIGNER	monophos-(240)SYELPDGQVITIGNER	350800	402474	1.38333e+06	525759	833492	328108	988196	1.13654e+06	500289	289295	1.049e+06	721947	289057	239050	799346	1.70238e+06	8	8	8	8	0.583653	0.845445	0.488651	0.549651
P60710	Actb	Actin, cytoplasmic 1	196	GYSFTTTAEREIVR	monophos-(196)GYSFTTTAEREIVR		267180	271357		388014			203036	402578	284662	224708				490144		4	4	5	3	0.495082	0.373185	0.175555	0.373618
P60710	Actb	Actin, cytoplasmic 1	215	LCYVALDFEQEMATAASSSSLEK	monophos-(215)LCYVALDFEQEMATAASSSSLEK			462634		254568						366423		64096.5				2	2	2	2	0.767476	0.516503	0.59554	0.13921
P60710	Actb	Actin, cytoplasmic 1	238	SYELPDGQVITIGNER	monophos-(238)SYELPDGQVITIGNER	350800	402474	1.38333e+06	525759	833492	328108	988196	1.13654e+06	500289	289295	1.049e+06	721947	289057	239050	799346	1.70238e+06	8	8	8	8	0.583653	0.845445	0.488651	0.549651
Q8BFZ3	Actbl2	Beta-actin-like protein 2	239	SYELPDGQVITIGNER	monophos-(239)SYELPDGQVITIGNER	350800	402474	1.38333e+06	525759	833492	328108	988196	1.13654e+06	500289	289295	1.049e+06	721947	289057	239050	799346	1.70238e+06	8	8	8	8	0.583653	0.845445	0.488651	0.549651
P68033	Actc1	Actin, alpha cardiac muscle 1	198	GYSFVTTAER	monophos-(198)GYSFVTTAER		151022															1	0	1	0	#DIV/0!	#DIV/0!	#DIV/0!	#DIV/0!
P68033	Actc1	Actin, alpha cardiac muscle 1	240	SYELPDGQVITIGNER	monophos-(240)SYELPDGQVITIGNER	350800	402474	1.38333e+06	525759	833492	328108	988196	1.13654e+06	500289	289295	1.049e+06	721947	289057	239050	799346	1.70238e+06	8	8	8	8	0.583653	0.845445	0.488651	0.549651
P63260	Actg1	Actin, cytoplasmic 2	196	GYSFTTTAEREIVR	monophos-(196)GYSFTTTAEREIVR		267180	271357		388014			203036	402578	284662	224708				490144		4	4	5	3	0.495082	0.373185	0.175555	0.373618
P63260	Actg1	Actin, cytoplasmic 2	215	LCYVALDFEQEMATAASSSSLEK	monophos-(215)LCYVALDFEQEMATAASSSSLEK			462634		254568						366423		64096.5				2	2	2	2	0.767476	0.516503	0.59554	0.13921
P63260	Actg1	Actin, cytoplasmic 2	238	SYELPDGQVITIGNER	monophos-(238)SYELPDGQVITIGNER	350800	402474	1.38333e+06	525759	833492	328108	988196	1.13654e+06	500289	289295	1.049e+06	721947	289057	239050	799346	1.70238e+06	8	8	8	8	0.583653	0.845445	0.488651	0.549651
P63268	Actg2	Actin, gamma-enteric smooth muscle	197	GYSFVTTAER	monophos-(197)GYSFVTTAER		151022															1	0	1	0	#DIV/0!	#DIV/0!	#DIV/0!	#DIV/0!
P63268	Actg2	Actin, gamma-enteric smooth muscle	239	SYELPDGQVITIGNER	monophos-(239)SYELPDGQVITIGNER	350800	402474	1.38333e+06	525759	833492	328108	988196	1.13654e+06	500289	289295	1.049e+06	721947	289057	239050	799346	1.70238e+06	8	8	8	8	0.583653	0.845445	0.488651	0.549651
Q99JY9	Actr3	Actin-related protein 3	409	HNPVFGVMS	monophos-(409)HNPVFGVMS	2.17169e+06	2.37852e+06	6.15392e+06	3.15798e+06	4.29376e+06	1.63538e+06	6.27768e+06	5.34797e+06	3.76305e+06	1.97867e+06	6.56599e+06	6.20058e+06	1.8937e+06	2.07801e+06	5.78823e+06	6.60315e+06	8	8	8	8	0.693572	0.674093	0.877301	0.850964
Q641P0	Actr3b	Actin-related protein 3B	409	HNPVFGVMS	monophos-(409)HNPVFGVMS	2.17169e+06	2.37852e+06	6.15392e+06	3.15798e+06	4.29376e+06	1.63538e+06	6.27768e+06	5.34797e+06	3.76305e+06	1.97867e+06	6.56599e+06	6.20058e+06	1.8937e+06	2.07801e+06	5.78823e+06	6.60315e+06	8	8	8	8	0.693572	0.674093	0.877301	0.850964
Q8R534	Adam1b	Disintegrin and metalloproteinase domain-containing protein 1b	457	EGDVCRPADGPCDLEEYCNGTSAACPSDR	monophos-(457)EGDVCRPADGPCDLEEYCNGTSAACPSDR					492526												1	0	0	1	#DIV/0!	#DIV/0!	#DIV/0!	#DIV/0!
Q9R1V6	Adam22	Disintegrin and metalloproteinase domain-containing protein 22	128	GGEHCYYQGQIRGNPVSFVALSTCHGLHGMFYDGNHTYLIEPEENEK	monophos-(128)GGEHCYYQGQIRGNPVSFVALSTCHGLHGMFYDGNHTYLIEPEENEK									470955								0	1	1	0	#DIV/0!	#DIV/0!	#DIV/0!	#DIV/0!
Q9R1V6	Adam22	Disintegrin and metalloproteinase domain-containing protein 22	829	SNSWQGNMGGNKK	monophos-(829)SNSWQGNMGGNKK	767395	3.09258e+06	3.41257e+06	801599	777603	423429	3.5378e+06	420976	1.8912e+06	1862368	2.76132e+06	578156	216950	659449	546804	1.08253e+06	8	8	8	8	0.23466	0.453691	0.926617	0.108706
P59511	Adamts20	A disintegrin and metalloproteinase with thrombospondin motifs 20	1040	QVWCQLSEDPMRDGFCNASTKPESLRPCELR	monophos-(1040)QVWCQLSEDPMRDGFCNASTKPESLRPCELR															1.29355e+06		0	1	0	1	#DIV/0!	#DIV/0!	#DIV/0!	#DIV/0!
P84309	Adcy5	Adenylate cyclase type 5	155	SVELGLEER	monophos-(155)SVELGLEER					93088.4												1	0	0	1	#DIV/0!	#DIV/0!	#DIV/0!	#DIV/0!
P51830	Adcy9	Adenylate cyclase type 9	604	GQGTASPGSVSDLAQTVK	diphos-(604)GQGTASPGSVSDLAQTVK		1.27209e+06	1.32932e+06	788315	2.07483e+06	162969	1.86321e+06	989207		2.08372e+06	515937	2.55575e+06	1.48263e+06	750443	691124	682480	7	7	6	8	0.61258	0.919421	0.676095	0.395082
P51830	Adcy9	Adenylate cyclase type 9	604	GQGTASPGSVSDLAQTVK	monophos-(604)GQGTASPGSVSDLAQTVK	317742	1.01547e+06	743054	289477	766835	219669	346286	173177	723684	1.98581e+06	391505	520302	1.05896e+06	168976	259918	748748	8	8	8	8	0.12064	0.306199	0.217039	0.24492
P51830	Adcy9	Adenylate cyclase type 9	1326	AIEKDSCEDIGVEEASELSK	monophos-(1326)AIEKDSCEDIGVEEASELSK													132721				0	1	0	1	#DIV/0!	#DIV/0!	#DIV/0!	#DIV/0!
P70205	Adcyap1r1	Pituitary adenylate cyclase-activating polypeptide type I receptor	0	MARTLQLSLTALLLLPMAIAMHSDCIFK	diphos-(0)MARTLQLSLTALLLLPMAIAMHSDCIFK												1.8115e+07				50367.2	0	2	1	1	#DIV/0!	#DIV/0!	#DIV/0!	#DIV/0!
Q9QYC0	Add1	Alpha-adducin	6	AAVVTSPPPTTAPHKER	monophos-(6)AAVVTSPPPTTAPHKER	4.16949e+06	1.57195e+07	1.01914e+07	6.49731e+06	1.23814e+07	1.99189e+06	1.6806e+07	1.05482e+07	1.01199e+07	1.4013e+07	1.01903e+07	8.76551e+06	4.47764e+06	2.58052e+06	7.23787e+06	1.56277e+07	8	8	8	8	0.648807	0.789648	0.269613	0.685716
Q9QYC0	Add1	Alpha-adducin	352	SRSPGTPAGEGSGSPPK	diphos-(352)SRSPGTPAGEGSGSPPK	5.73896e+06	1.09181e+07	1.68836e+07	6.03996e+06	357937	1.71725e+06	1.71573e+07	3.6164e+06	7.55593e+06	6.69745e+06	1.78391e+07	6.49939e+06	6.2639e+06	4.88709e+06	3.35093e+06	7.58924e+06	8	8	8	8	0.315813	0.938396	0.900168	0.124691
Q9QYC0	Add1	Alpha-adducin	352	SRSPGTPAGEGSGSPPK	monophos-(352)SRSPGTPAGEGSGSPPK	658509	626718	1.46087e+06	357259	73455.1	185929	613511	345835	1.61159e+06	1.56941e+06	1.25857e+06	615443	306349	397942	238097	1.7563e+06	8	8	8	8	0.306528	0.139187	0.882552	0.0613122
Q9QYC0	Add1	Alpha-adducin	354	SPGTPAGEGSGSPPKWQIGEQEFEALMR	diphos-(354)SPGTPAGEGSGSPPKWQIGEQEFEALMR	388030	812117	1.61524e+06	1.93156e+06	160234	509870	2.10851e+06	1.12025e+06	530417	952926	536184	2.44674e+06	1.04934e+06	1.04809e+06	2.41288e+06	1.92469e+06	8	8	8	8	0.864629	0.471501	0.912286	0.722462
Q9QYC0	Add1	Alpha-adducin	354	SPGTPAGEGSGSPPK	monophos-(354)SPGTPAGEGSGSPPK	553076	1.58667e+06	1.39367e+06	1.07037e+06		554833	1.61628e+06	386123	989851	1.29426e+06	1.14511e+06	2.42296e+06	491901	419538	918493	2.38923e+06	7	8	8	7	0.373423	0.506328	0.402854	0.33499
Q9QYC0	Add1	Alpha-adducin	405	KYSDVEVPASVTGHSFASDGDSGTCSPLR	diphos-(405)KYSDVEVPASVTGHSFASDGDSGTCSPLR		691537	250381														2	0	2	0	#DIV/0!	#DIV/0!	#DIV/0!	#DIV/0!
Q9QYC0	Add1	Alpha-adducin	406	YSDVEVPASVTGHSFASDGDSGTCSPLR	diphos-(406)YSDVEVPASVTGHSFASDGDSGTCSPLR	808823	3.58818e+06	1.25562e+07	3.94938e+06	7.20737e+06	2.08536e+06	2.61884e+06	2.16131e+06	3.43381e+06	5.84058e+06	1.35591e+06	7.06605e+06	6.87396e+06	5.01352e+06	1.75959e+06	2.97522e+06	8	8	8	8	0.180278	0.9588	0.189505	0.531226
Q9QYC0	Add1	Alpha-adducin	406	YSDVEVPASVTGHSFASDGDSGTCSPLR	monophos-(406)YSDVEVPASVTGHSFASDGDSGTCSPLR	517141	949633	2.82323e+06	665507	2.73595e+06	723601	1.56463e+06	818775	1.38724e+06	1.43014e+06	1.90232e+06	2.66637e+06	851985	567687	431678	1.90281e+06	8	8	8	8	0.595212	0.921587	0.838916	0.42386
Q9QYC0	Add1	Alpha-adducin	446	WLHSGRGDDASEEGQNGSSPK	monophos-(446)WLHSGRGDDASEEGQNGSSPK					251591												1	0	0	1	#DIV/0!	#DIV/0!	#DIV/0!	#DIV/0!
Q9QYC0	Add1	Alpha-adducin	582	QKGSEENLDETR	monophos-(582)QKGSEENLDETR	67196.4	161593	88220.3	213548		35937.6	314688		165848	206669	199323			50384.9		314744	6	5	7	4	0.870726	0.522079	0.0403647	0.807152
Q9QYC0	Add1	Alpha-adducin	597	EKSPPDQSAVPNTPPSTPVK	diphos-(597)EKSPPDQSAVPNTPPSTPVK	1.38931e+06	348085	2.62263e+06	133932	2.44611e+06	323087	880159		2.85772e+06	6.71982e+06	2.67577e+06		202751	559667			7	5	7	5	0.0472904	0.293447	0.107919	0.184193
Q9QYC0	Add1	Alpha-adducin	599	SPPDQSAVPNTPPSTPVKLEEDLPQEPTSR	diphos-(599)SPPDQSAVPNTPPSTPVKLEEDLPQEPTSR	8.6876e+06	2.04393e+07	2.78035e+07	2.07169e+07	1.57278e+07	3.81559e+06	2.2148e+07	1.23237e+07	1.38436e+07	1.49239e+07	1.14147e+07	2.83685e+07	1.22713e+07	9.1389e+06	1.08625e+07	3.49459e+07	8	8	8	8	0.649513	0.90738	0.492984	0.475369
Q9QYC0	Add1	Alpha-adducin	599	SPPDQSAVPNTPPSTPVKLEEDLPQEPTSR	monophos-(599)SPPDQSAVPNTPPSTPVKLEEDLPQEPTSR	682222	1.36815e+06	2.75851e+06	621364		118698	1.04877e+06		1.27988e+06	1.59317e+06	1.01835e+06	1.89898e+06	557183		669059	1.1269e+06	6	7	8	5	0.145343	0.87496	0.313718	0.0693229
Q9QYC0	Add1	Alpha-adducin	721	TPSFLKK	monophos-(721)TPSFLKK	2.8748e+06	6.65331e+06	5.69915e+06	4.73263e+06	1.30933e+06	2.07403e+06	6.79431e+06	3.55497e+06	4.75255e+06	6.16751e+06	5.44758e+06	3.54667e+06	1.38675e+06	2.11009e+06	4.53441e+06	5.5904e+06	8	8	8	8	0.617591	0.983898	0.239437	0.0888419
Q9QYB8	Add2	Beta-adducin	53	VTMILQSPSFR	monophos-(53)VTMILQSPSFR				168896												224216	1	1	1	1	#DIV/0!	#DIV/0!	#DIV/0!	#DIV/0!
Q9QYB8	Add2	Beta-adducin	527	SRSPSTESQLMSK	diphos-(527)SRSPSTESQLMSK			380424			250682	789093							487303	618698		3	2	1	4	0.455339	0.735899	#DIV/0!	#DIV/0!
Q9QYB8	Add2	Beta-adducin	527	SRSPSTESQLMSK	monophos-(527)SRSPSTESQLMSK	314691	1.82924e+06	735491		811662	382061	511463	220713	1.47536e+06	669607	759742		178398		365420		7	5	6	6	0.889419	0.991869	0.0687772	0.0516557
Q9QYB8	Add2	Beta-adducin	540	GDADTKDESEETVPNPFSQLTDQELEEYK	diphos-(540)GDADTKDESEETVPNPFSQLTDQELEEYK				155413				196134									2	0	1	1	#DIV/0!	#DIV/0!	#DIV/0!	#DIV/0!
Q9QYB8	Add2	Beta-adducin	585	DIATEKPGSPVK	monophos-(585)DIATEKPGSPVK		210404		212056			326049	169961	279606	473104		242638			252488	569336	4	5	5	4	0.222806	0.142213	0.403704	0.639744
Q9QYB8	Add2	Beta-adducin	597	STPASPVQSPSKAGTK	diphos-(597)STPASPVQSPSKAGTK	1.11354e+06	2.10316e+06	4.25491e+06	3.69881e+06	483101	399526	7.9552e+06	1.92971e+06	2.45161e+06	3.43777e+06	4.76916e+06	5.1739e+06	952825	767797	3.62415e+06	7.43101e+06	8	8	8	8	0.752264	0.495747	0.050382	0.72553
Q9QYB8	Add2	Beta-adducin	597	STPASPVQSPSK	monophos-(597)STPASPVQSPSK			308754	353837			679899	272010	782907	539966	394679	322133		62642.4	296918	594908	4	7	6	5	0.76521	0.86489	0.495696	0.611304
Q9QYB8	Add2	Beta-adducin	609	AGTKSPAVSPSK	diphos-(609)AGTKSPAVSPSK											21993.9						0	1	1	0	#DIV/0!	#DIV/0!	#DIV/0!	#DIV/0!
Q9QYB8	Add2	Beta-adducin	613	SPAVSPSKTSEDTK	diphos-(613)SPAVSPSKTSEDTK	149723	444845		396576		76547.6	798321	233609	252146	368536		338909	189183	109538	407939	554574	6	7	6	7	0.199736	0.782035	0.0673857	0.909753
Q9QYB8	Add2	Beta-adducin	613	SPAVSPSKTSEDTK	monophos-(613)SPAVSPSKTSEDTK	27312.3								226952		172460	393352		84748.6			1	4	4	1	#DIV/0!	#DIV/0!	#DIV/0!	#DIV/0!
Q9QYB8	Add2	Beta-adducin	651	EEEPSVEEALSKGLGQMTTNADTDGDSYK	diphos-(651)EEEPSVEEALSKGLGQMTTNADTDGDSYK														298374			0	1	0	1	#DIV/0!	#DIV/0!	#DIV/0!	#DIV/0!
Q9QYB8	Add2	Beta-adducin	651	EEEPSVEEALSKGLGQMTTNADTDGDSYK	monophos-(651)EEEPSVEEALSKGLGQMTTNADTDGDSYK													191340				0	1	0	1	#DIV/0!	#DIV/0!	#DIV/0!	#DIV/0!
Q9QYB8	Add2	Beta-adducin	682	TESVTSGPLSPEGSPSKSPSK	diphos-(682)TESVTSGPLSPEGSPSKSPSK	1.07478e+06	921300	2.3282e+06		270687	265603	4.86659e+06		1.17216e+06	1405200	5.43823e+06		400557	8.44428e+06	804474		6	6	6	6	0.202805	0.401872	0.162538	0.778112
Q9QYB8	Add2	Beta-adducin	682	TESVTSGPLSPEGSPSKSPSK	monophos-(682)TESVTSGPLSPEGSPSKSPSK	431559						1.53783e+06		1.38515e+06	614951	1.03456e+06						2	3	4	1	0.359339	0.960737	#DIV/0!	#DIV/0!
Q9QYB8	Add2	Beta-adducin	709	TPSFLKK	monophos-(709)TPSFLKK	2.8748e+06	6.65331e+06	5.69915e+06	4.73263e+06	1.30933e+06	2.07403e+06	6.79431e+06	3.55497e+06	4.75255e+06	6.16751e+06	5.44758e+06	3.54667e+06	1.38675e+06	2.11009e+06	4.53441e+06	5.5904e+06	8	8	8	8	0.617591	0.983898	0.239437	0.0888419
Q9QYB5	Add3	Gamma-adducin	401	SDVEIPATVTAFSFEDDSAPLSPLK	diphos-(401)SDVEIPATVTAFSFEDDSAPLSPLK			439940														1	0	1	0	#DIV/0!	#DIV/0!	#DIV/0!	#DIV/0!
Q9QYB5	Add3	Gamma-adducin	401	SDVEIPATVTAFSFEDDSAPLSPLK	monophos-(401)SDVEIPATVTAFSFEDDSAPLSPLK			90200.3										67240				1	1	1	1	#DIV/0!	#DIV/0!	#DIV/0!	#DIV/0!
Q9QYB5	Add3	Gamma-adducin	667	TEEVLSPDGSPSKSPSK	diphos-(667)TEEVLSPDGSPSKSPSK		316446	1.42983e+06		127308		538067			487050			245139	97922.4			4	3	3	4	0.211836	0.398937	0.109503	0.176672
Q9QYB5	Add3	Gamma-adducin	667	TEEVLSPDGSPSKSPSK	monophos-(667)TEEVLSPDGSPSKSPSK		334042			456143				190141	905270			131374				2	3	3	2	0.280594	0.968655	0.788985	0.593404
Q9QYB5	Add3	Gamma-adducin	690	TPSFLKK	monophos-(690)TPSFLKK	2.8748e+06	6.65331e+06	5.69915e+06	4.73263e+06	1.30933e+06	2.07403e+06	6.79431e+06	3.55497e+06	4.75255e+06	6.16751e+06	5.44758e+06	3.54667e+06	1.38675e+06	2.11009e+06	4.53441e+06	5.5904e+06	8	8	8	8	0.617591	0.983898	0.239437	0.0888419
Q01338	Adra2a	Alpha-2A adrenergic receptor	334	RGPGAAGPGASGSGHGEER	monophos-(334)RGPGAAGPGASGSGHGEER				22004.5													1	0	1	0	#DIV/0!	#DIV/0!	#DIV/0!	#DIV/0!
Q99MK8	Adrbk1	Beta-adrenergic receptor kinase 1	474	GEVNAADAFDIGSFDEEDTK	monophos-(474)GEVNAADAFDIGSFDEEDTK	232305	315320	775127	302438	234811	117800	692668	309975	251249	471019	550086	259623	150688	146209	760676	364979	8	8	8	8	0.825181	0.977292	0.494522	0.675947
Q99MK8	Adrbk1	Beta-adrenergic receptor kinase 1	665	NKPRSPVVELSK	monophos-(665)NKPRSPVVELSK	98524.5		518215				127929	344974	143009		627163					524523	4	3	4	3	0.650477	0.391482	0.75759	0.941247
Q3UYH7	Adrbk2	Beta-adrenergic receptor kinase 2	474	GEVNAADAFDIGSFDEEDTK	monophos-(474)GEVNAADAFDIGSFDEEDTK	232305	315320	775127	302438	234811	117800	692668	309975	251249	471019	550086	259623	150688	146209	760676	364979	8	8	8	8	0.825181	0.977292	0.494522	0.675947
Q3UPL5	Ag2	Uncharacterized protein C11orf96 homolog	176	FKTQPVTFDEIQEVEEEGVSPMEEEK	diphos-(176)FKTQPVTFDEIQEVEEEGVSPMEEEK			226136														1	0	1	0	#DIV/0!	#DIV/0!	#DIV/0!	#DIV/0!
Q3UPL5	Ag2	Uncharacterized protein C11orf96 homolog	178	TQPVTFDEIQEVEEEGVSPMEEEK	monophos-(178)TQPVTFDEIQEVEEEGVSPMEEEK			238116		859108						305181		429553			223656	2	3	2	3	0.102982	0.416933	0.205754	0.409247
Q3UPL5	Ag2	Uncharacterized protein C11orf96 homolog	216	STQSLSLQR	monophos-(216)STQSLSLQR											118035					167630	0	2	1	1	#DIV/0!	#DIV/0!	#DIV/0!	#DIV/0!
Q3UHD9	Agap2	Arf-GAP with GTPase, ANK repeat and PH domain-containing protein 2	141	RPLLSSPSWGGPEPEGR	monophos-(141)RPLLSSPSWGGPEPEGR	351672	2.934e+06	1.66927e+06	938875	723884	231436	1.10884e+06	422386	533466	1.18644e+06	476486	859376	1.33299e+06	268314	290342	620746	8	8	8	8	0.047503	0.334561	0.0743748	0.160755
Q3UHD9	Agap2	Arf-GAP with GTPase, ANK repeat and PH domain-containing protein 2	225	STAGTGASAAAAGGGGSAAVTTSGGVGAGAGTR	monophos-(225)STAGTGASAAAAGGGGSAAVTTSGGVGAGAGTR				907855		169838											2	0	1	1	#DIV/0!	#DIV/0!	#DIV/0!	#DIV/0!
Q3UHD9	Agap2	Arf-GAP with GTPase, ANK repeat and PH domain-containing protein 2	348	STGGPPGPGPLPGPQGLSSSSGSR	diphos-(348)STGGPPGPGPLPGPQGLSSSSGSR		143643			176151								194813	93556.2			2	2	1	3	0.39554	0.795468	#DIV/0!	#DIV/0!
Q3UHD9	Agap2	Arf-GAP with GTPase, ANK repeat and PH domain-containing protein 2	348	STGGPPGPGPLPGPQGLSSSSGSR	monophos-(348)STGGPPGPGPLPGPQGLSSSSGSR	664143	5.16565e+06	3.40042e+06	4.40243e+06	3.64122e+06	936938	6.02298e+06	746289	1.66019e+06	3.25822e+06	2.90116e+06	1.94267e+06	1.87007e+06	1.4643e+06	3.83986e+06	2.80517e+06	8	8	8	8	0.0294744	0.435517	0.623825	0.757013
Q3UHD9	Agap2	Arf-GAP with GTPase, ANK repeat and PH domain-containing protein 2	639	RTSLFANR	monophos-(639)RTSLFANR					89626.1								231295				1	1	0	2	#DIV/0!	#DIV/0!	#DIV/0!	#DIV/0!
Q3UHD9	Agap2	Arf-GAP with GTPase, ANK repeat and PH domain-containing protein 2	640	TSLFANR	monophos-(640)TSLFANR					38693.6												1	0	0	1	#DIV/0!	#DIV/0!	#DIV/0!	#DIV/0!
Q3UHD9	Agap2	Arf-GAP with GTPase, ANK repeat and PH domain-containing protein 2	799	ALSTDCTPSGDLSPLSR	monophos-(799)ALSTDCTPSGDLSPLSR	618926	2.07393e+06	2.71187e+06	674729	2.01381e+06	583799	727164	331345	1.4398e+06	2.30265e+06	1.02944e+06	1.09524e+06	1.33201e+06	929728	550996	546634	8	8	8	8	0.24146	0.868017	0.374317	0.0899454
Q3UHD9	Agap2	Arf-GAP with GTPase, ANK repeat and PH domain-containing protein 2	853	LKSFGSLR	diphos-(853)LKSFGSLR	367010	1.22426e+06	2.55236e+06	1.5274e+06	1.38147e+06	353971	2.23547e+06	835419	559846	805071	1.20991e+06	1.21812e+06	606901	743051	1.02416e+06	1.01592e+06	8	8	8	8	0.00763407	0.201581	0.688847	0.621863
Q3UHD9	Agap2	Arf-GAP with GTPase, ANK repeat and PH domain-containing protein 2	916	LRTDSQSEAVAIQAIR	monophos-(916)LRTDSQSEAVAIQAIR		406080	907416					149285					283427				3	1	2	2	#DIV/0!	#DIV/0!	0.332883	0.231758
Q8K2K6	Agfg1	Arf-GAP domain and FG repeat-containing protein 1	161	SLLGESAPALHLNKGTPSQSPVVGR	diphos-(161)SLLGESAPALHLNKGTPSQSPVVGR		228930	353080		179049	335269	604310	1.00367e+06			540622						6	1	3	4	#DIV/0!	#DIV/0!	0.32603	0.520923
Q8K2K6	Agfg1	Arf-GAP domain and FG repeat-containing protein 1	175	GTPSQSPVVGR	monophos-(175)GTPSQSPVVGR		510414	645504		287906	191620					743187						4	1	3	2	#DIV/0!	#DIV/0!	0.761681	0.0250423
Q8K2K6	Agfg1	Arf-GAP domain and FG repeat-containing protein 1	290	SSSADFGTFSTSQSHQTASTVSK	monophos-(290)SSSADFGTFSTSQSHQTASTVSK		798315															1	0	1	0	#DIV/0!	#DIV/0!	#DIV/0!	#DIV/0!
Q9ESW4	Agk	Acylglycerol kinase, mitochondrial	281	LASFWAQPQDASSR	monophos-(281)LASFWAQPQDASSR	55125.1		250448		298283												3	0	2	1	#DIV/0!	#DIV/0!	#DIV/0!	#DIV/0!
Q68FL4	Ahcyl2	Putative adenosylhomocysteinase 3	99	HRDGGEALVSPDGTVTEAPR	monophos-(99)HRDGGEALVSPDGTVTEAPR		285233	457007							404151			408442				2	2	3	1	0.0318004	0.752529	#DIV/0!	#DIV/0!
P29699	Ahsg	Alpha-2-HS-glycoprotein	126	VMHTQCHSTPDSAEDVRK	monophos-(126)VMHTQCHSTPDSAEDVRK	1.14783e+06				309947				3.6248e+06		4.50037e+06		186915				2	3	3	2	0.361435	0.322473	0.0707104	0.116051
P29699	Ahsg	Alpha-2-HS-glycoprotein	301	HAFSPVASVESASGETLHSPK	diphos-(301)HAFSPVASVESASGETLHSPK					536251			2.05258e+06	442993				401070			1.00276e+06	2	3	1	4	0.171462	0.352344	#DIV/0!	#DIV/0!
P29699	Ahsg	Alpha-2-HS-glycoprotein	301	HAFSPVASVESASGETLHSPK	monophos-(301)HAFSPVASVESASGETLHSPK									411249		431954					705370	0	3	2	1	#DIV/0!	#DIV/0!	#DIV/0!	#DIV/0!
Q920P5	Ak5	Adenylate kinase isoenzyme 5	97	LPPIHQFSIESDTDLSETAELIEEYEVFDPTRPRPK	diphos-(97)LPPIHQFSIESDTDLSETAELIEEYEVFDPTRPRPK					144872			118259									2	0	0	2	#DIV/0!	#DIV/0!	#DIV/0!	#DIV/0!
Q9WTQ5	Akap12	A-kinase anchor protein 12	260	EKEPTKPLESPTSPVSNETTSSFK	diphos-(260)EKEPTKPLESPTSPVSNETTSSFK	356461								661410	381382	237084						1	3	4	0	#DIV/0!	#DIV/0!	#DIV/0!	#DIV/0!
Q9WTQ5	Akap12	A-kinase anchor protein 12	348	LSADYEKVELPLEDQVGDLEALSEK	monophos-(348)LSADYEKVELPLEDQVGDLEALSEK	52785.3																1	0	1	0	#DIV/0!	#DIV/0!	#DIV/0!	#DIV/0!
D3YVF0	Akap5	A-kinase anchor protein 5	13	DEKGPVAASPQK	monophos-(13)DEKGPVAASPQK						130720					875743			40659.8			1	2	1	2	#DIV/0!	#DIV/0!	#DIV/0!	#DIV/0!
D3YVF0	Akap5	A-kinase anchor protein 5	71	QPAGAWASIK	monophos-(71)QPAGAWASIK	214140	396785															2	0	2	0	#DIV/0!	#DIV/0!	#DIV/0!	#DIV/0!
D3YVF0	Akap5	A-kinase anchor protein 5	157	AQTQPDDQAIQAGSTQGLQEGVLVR	monophos-(157)AQTQPDDQAIQAGSTQGLQEGVLVR					447357										415406		1	1	0	2	#DIV/0!	#DIV/0!	#DIV/0!	#DIV/0!
D3YVF0	Akap5	A-kinase anchor protein 5	212	SSAIQMGTPELEKETK	monophos-(212)SSAIQMGTPELEKETK	1.25365e+06	1.95835e+06	1.32928e+06	1.99805e+06	761080	588418	2.05987e+06	488345	1.5075e+06	2.02727e+06	1.11162e+06	1.84216e+06	281904	663086	3.52552e+06	5.08179e+06	8	8	8	8	0.0311884	0.276733	0.000550635	0.935839
D3YVF0	Akap5	A-kinase anchor protein 5	240	ASLLESSAAGSPR	diphos-(240)ASLLESSAAGSPR		178714		1.23893e+06	165402	124893	459618							114512			5	1	2	4	#DIV/0!	#DIV/0!	0.0391672	0.521281
D3YVF0	Akap5	A-kinase anchor protein 5	240	ASLLESSAAGSPR	monophos-(240)ASLLESSAAGSPR	2.13385e+06	3.3588e+06	2.74233e+06	989229	1.77217e+06	1.39034e+06	3.55316e+06	1.71507e+06	3.20619e+06	3.89191e+06	3.33914e+06	4.42723e+06	1.37139e+06	1.14033e+06	3.01547e+06	7.76815e+06	8	8	8	8	0.0515717	0.122238	0.0735603	0.738851
D3YVF0	Akap5	A-kinase anchor protein 5	424	EATVVGQAEEATVDRAEEATVGQAEEATVGHTEK	monophos-(424)EATVVGQAEEATVDRAEEATVGQAEEATVGHTEK								515123									1	0	0	1	#DIV/0!	#DIV/0!	#DIV/0!	#DIV/0!
B1AXD8	Akirin2	Akirin-2	9	TLDFDPLLSPASPK	monophos-(9)TLDFDPLLSPASPK			189537	120484	155370		148219				50642.1					163368	4	2	3	3	0.134984	0.316455	0.0235373	0.470487
Q8CG76	Akr7a2	Aflatoxin B1 aldehyde reductase member 2	37	AASGAPLRPATVLGTMEMGR	monophos-(37)AASGAPLRPATVLGTMEMGR			108825								220310	163292				301767	1	3	3	1	#DIV/0!	#DIV/0!	#DIV/0!	#DIV/0!
P31750	Akt1	RAC-alpha serine/threonine-protein kinase	121	SGSPSDNSGAEEMEVSLAKPK	monophos-(121)SGSPSDNSGAEEMEVSLAKPK		120660															1	0	1	0	#DIV/0!	#DIV/0!	#DIV/0!	#DIV/0!
Q9D1F4	Akt1s1	Proline-rich AKT1 substrate 1	70	AATATRPPGPPPAPQPPSPAPSPPPRPALAR	diphos-(70)AATATRPPGPPPAPQPPSPAPSPPPRPALAR			972186	977735	1.46669e+06	203848	5.47948e+06	2.47195e+06	388901		2.60456e+06	6.21511e+06	588412		958659	3.02341e+06	6	6	5	7	0.74515	0.762902	0.536122	0.869068
Q9D1F4	Akt1s1	Proline-rich AKT1 substrate 1	198	TEARSSDEENGPPSSPDLDR	diphos-(198)TEARSSDEENGPPSSPDLDR														142551			0	1	0	1	#DIV/0!	#DIV/0!	#DIV/0!	#DIV/0!
Q9D1F4	Akt1s1	Proline-rich AKT1 substrate 1	244	LNTSDFQK	monophos-(244)LNTSDFQK			214375					827403			866955					952548	2	2	2	2	0.176631	0.335815	0.241239	0.403371
Q64362	Aktip	AKT-interacting protein	21	TLAGDVKTSPPR	monophos-(21)TLAGDVKTSPPR		219101															1	0	1	0	#DIV/0!	#DIV/0!	#DIV/0!	#DIV/0!
P10518	Alad	Delta-aminolevulinic acid dehydratase	209	DAAQSSPAFGDRR	monophos-(209)DAAQSSPAFGDRR	460533	730755	686288	195189	616111	223364	1.02738e+06	1.36956e+06	741412	214178	1.57328e+06	663078	184396	292646	995093	1.16626e+06	8	8	8	8	0.558295	0.77599	0.844896	0.738905
P05064	Aldoa	Fructose-bisphosphate aldolase A	28	GILAADESTGSIAKR	monophos-(28)GILAADESTGSIAKR	4.30161e+06	4.88358e+06	4.2271e+06	4.6514e+06	7.52506e+06	1.99382e+06	9.86691e+06	8.14596e+06	6.1935e+06	4.34087e+06	7.58244e+06	6.89585e+06	2.49505e+06	2.002e+06	8.36225e+06	8.57615e+06	8	8	8	8	0.999511	0.935112	0.0251996	0.576368
P05064	Aldoa	Fructose-bisphosphate aldolase A	43	LQSIGTENTEENR	monophos-(43)LQSIGTENTEENR	134202	150330	184194							253641	243954			104575	219161	231122	3	5	5	3	0.31221	0.200376	0.591058	0.855122
P05063	Aldoc	Fructose-bisphosphate aldolase C	28	GILAADESVGSMAKR	monophos-(28)GILAADESVGSMAKR	1.34005e+06	1.5112e+06	2.25875e+06	1.18891e+06	1.91815e+06	614842	4.83892e+06	2.19035e+06	1.85602e+06	2.29673e+06	2.33567e+06	2.85089e+06	1.63795e+06	574098	3.20066e+06	4.11685e+06	8	8	8	8	0.650955	0.533514	0.0179532	0.48042
Q920R0	Als2	Alsin	474	RLSLPGLLSQVSPR	diphos-(474)RLSLPGLLSQVSPR			291025	182084	186983		463678					269034					4	1	3	2	#DIV/0!	#DIV/0!	0.15367	0.5355
Q920R0	Als2	Alsin	1133	SGKLTSSSPSMFIGQWVMDK	monophos-(1133)SGKLTSSSPSMFIGQWVMDK			610250														1	0	1	0	#DIV/0!	#DIV/0!	#DIV/0!	#DIV/0!
O08583	Alyref	THO complex subunit 4	233	QQLSAEELDAQLDAYNAR	monophos-(233)QQLSAEELDAQLDAYNAR	183104	97044.9															2	0	2	0	#DIV/0!	#DIV/0!	#DIV/0!	#DIV/0!
Q8CCJ4	Amer2	APC membrane recruitment protein 2	70	SGGTMPSIFGVK	monophos-(70)SGGTMPSIFGVK						49648.7	276304	185694			112904				195072	306858	3	3	1	5	0.842726	0.711484	#DIV/0!	#DIV/0!
Q8CCJ4	Amer2	APC membrane recruitment protein 2	211	AAGPGNLVLPGSLTASLECVKEEPPR	diphos-(211)AAGPGNLVLPGSLTASLECVKEEPPR	856386	959424	1.2397e+06	855003			1.25051e+06	3.18841e+06		370054	694783			709295	589813	800736	6	5	6	5	0.00587881	0.0940787	0.0125893	0.385054
Q8CCJ4	Amer2	APC membrane recruitment protein 2	211	AAGPGNLVLPGSLTASLECVKEEPPR	monophos-(211)AAGPGNLVLPGSLTASLECVKEEPPR	79816.3	73724.8	337707	255145		137831		240349	126374		402363				196065		6	3	6	3	0.512862	0.538241	0.246614	0.812783
Q8CCJ4	Amer2	APC membrane recruitment protein 2	273	ICLEAGSPTGSGDQSSR	diphos-(273)ICLEAGSPTGSGDQSSR							209026							284814			1	1	0	2	#DIV/0!	#DIV/0!	#DIV/0!	#DIV/0!
Q8CCJ4	Amer2	APC membrane recruitment protein 2	273	ICLEAGSPTGSGDQSSR	monophos-(273)ICLEAGSPTGSGDQSSR			840334		2.77251e+06				545028		630366			208930			2	3	3	2	0.0511564	0.166313	0.0139108	0.637978
Q8CCJ4	Amer2	APC membrane recruitment protein 2	329	TVPLVDSEGGSGR	monophos-(329)TVPLVDSEGGSGR					206614												1	0	0	1	#DIV/0!	#DIV/0!	#DIV/0!	#DIV/0!
Q8CCJ4	Amer2	APC membrane recruitment protein 2	551	DSDSGDALCDLYVEPEASPATLPATEDPPCLSR	monophos-(551)DSDSGDALCDLYVEPEASPATLPATEDPPCLSR	417202	168177								1.96768e+06	344609						2	2	4	0	0.193839	0.40327	#DIV/0!	#DIV/0!
Q80ZD8	Amigo1	Amphoterin-induced protein 1	473	RMSDPESVSSVFSDTPIVV	diphos-(473)RMSDPESVSSVFSDTPIVV	60947.2	173798	291509	333873		320216	371475	259574	83655.9	76204.5	218288	351741	99582.4	391288	371537	212029	7	8	8	7	0.626689	0.606914	0.803747	0.145476
Q80ZD8	Amigo1	Amphoterin-induced protein 1	473	RMSDPESVSSVFSDTPIVV	monophos-(473)RMSDPESVSSVFSDTPIVV	149048	196987		109892	86275.9	115839	163193	225391	322094	384798	345164	274916	609133	108292	307577	220473	7	8	7	8	0.0193987	0.0116503	0.255083	0.740316
Q9DBT5	Ampd2	AMP deaminase 2	18	SLPGNAPCLK	monophos-(18)SLPGNAPCLK					112098												1	0	0	1	#DIV/0!	#DIV/0!	#DIV/0!	#DIV/0!
Q9DBT5	Ampd2	AMP deaminase 2	52	SLAESELR	monophos-(52)SLAESELR	235133	365886	456716	373729	232376	180472	567829	529331		306102	535457			130763	443537	547937	8	5	6	7	0.606611	0.783429	0.230567	0.974937
Q9DBT5	Ampd2	AMP deaminase 2	84	QISQDVKLEPDILLR	monophos-(84)QISQDVKLEPDILLR	530500	682077	3.14587e+06	1.79375e+06	1.59693e+06	539483	2.10994e+06	3.55776e+06	834750	726798	1.27447e+06	2.32827e+06	762208	427446	1.82308e+06	5.01679e+06	8	8	8	8	0.516876	0.889105	0.181009	0.402858
O08739	Ampd3	AMP deaminase 3	82	SQSLSLQMPTQQDWK	monophos-(82)SQSLSLQMPTQQDWK	349462	614472			1.17333e+06	461710	1.54986e+06		655821	717577					864366		5	3	4	4	0.0847176	0.795021	0.119391	0.130942
Q7TQF7	Amph	Amphiphysin	241	AFSIQGAPSDSGPLR	monophos-(241)AFSIQGAPSDSGPLR	1.45289e+06	1.38373e+06	3.24467e+06	1.17167e+06	1.30063e+06	751188	617530	1.35554e+06	1.91903e+06	1.80651e+06	1.76452e+06	2.27849e+06	1.61581e+06	934067	2.21717e+06	2.52492e+06	8	8	8	8	0.214928	0.176394	0.912101	0.186118
Q7TQF7	Amph	Amphiphysin	256	IAKTPSPPEEPSPLPSPTASPNHTLAPASPAPVRPR	diphos-(256)IAKTPSPPEEPSPLPSPTASPNHTLAPASPAPVRPR	785881	1.03232e+06	636179		1.33913e+06	446861		472787	1.1084e+06	1.11733e+06	1.0877e+06	754183				2.32538e+06	6	5	7	4	0.254677	0.123308	0.00329035	0.665299
Q7TQF7	Amph	Amphiphysin	259	TPSPPEEPSPLPSPTASPNHTLAPASPAPVRPR	diphos-(259)TPSPPEEPSPLPSPTASPNHTLAPASPAPVRPR	3.61266e+07	6.01788e+07	8.01313e+07	6.2897e+07	1.37249e+08	3.47227e+07	4.31815e+07	4.67736e+07	5.48663e+07	4.77888e+07	6.44884e+07	7.2688e+07	3.51013e+07	3.18347e+07	1.98712e+07	7.07579e+07	8	8	8	8	0.167572	0.362095	0.0178945	0.608996
Q7TQF7	Amph	Amphiphysin	259	TPSPPEEPSPLPSPTASPNHTLAPASPAPVRPR	monophos-(259)TPSPPEEPSPLPSPTASPNHTLAPASPAPVRPR	9.63432e+06	8.60042e+06	1.68268e+07	2.71201e+07	1.20327e+07	4.42501e+06	7.93772e+06	8.35583e+06	2.27582e+07	1.9919e+07	4.37421e+07	2.02277e+07	1.18522e+07	2.66705e+06	8.25672e+06	2.69524e+07	8	8	8	8	0.152748	0.15723	0.317282	0.038378
Q7TQF7	Amph	Amphiphysin	490	AALPAGEGGSPEGAK	monophos-(490)AALPAGEGGSPEGAK	1.36395e+07	1.42591e+07	1.28197e+07	1.68496e+07	5.31213e+06	5.61868e+06	2.83076e+07	1.2726e+07	2.16894e+07	2.14506e+07	2.8604e+07	1.28082e+07	2.78802e+06	5.01962e+06	2.14038e+07	2.64392e+07	8	8	8	8	0.460779	0.381205	0.129404	0.322661
Q7TQF7	Amph	Amphiphysin	505	IDGESTELAISESPQPVEPEAGAPQVIPSVVIEPASNHEGEGEHQETATGTEPR	monophos-(505)IDGESTELAISESPQPVEPEAGAPQVIPSVVIEPASNHEGEGEHQETATGTEPR									280004		852649					195583	0	3	2	1	#DIV/0!	#DIV/0!	#DIV/0!	#DIV/0!
Q7TQF7	Amph	Amphiphysin	617	VETLHDFEAANSDELNLQR	monophos-(617)VETLHDFEAANSDELNLQR	137838																1	0	1	0	#DIV/0!	#DIV/0!	#DIV/0!	#DIV/0!
Q02357	Ank1	Ankyrin-1	799	MSYPETVDEILDVSEDEGDELVGSK	monophos-(799)MSYPETVDEILDVSEDEGDELVGSK			131250														1	0	1	0	#DIV/0!	#DIV/0!	#DIV/0!	#DIV/0!
Q8C8R3	Ank2	Ankyrin-2	28	SDSNASFLR	diphos-(28)SDSNASFLR	188260	764882	1.77045e+06	1.05721e+06	782919	148804	2.04077e+06	479739	826462	1.5244e+06	800597	1.62319e+06	860434	422922	602746	916713	8	8	8	8	0.207233	0.882623	0.87797	0.315252
Q8C8R3	Ank2	Ankyrin-2	28	SDSNASFLR	monophos-(28)SDSNASFLR		518992	702772		518297		305049		551472	1.39801e+06			311539	168732			4	4	4	4	0.075393	0.74887	0.118761	0.0758977
Q8C8R3	Ank2	Ankyrin-2	830	HKLNVPETMTEVLDVSDEEGDDTVTGDGGEYLRPEDLK	monophos-(830)HKLNVPETMTEVLDVSDEEGDDTVTGDGGEYLRPEDLK	145508	1.01421e+06	6.6882e+06	575718	1.08479e+06	143151	811934	1.45491e+06	1.2689e+06	885368	626877	4.57439e+06	1.61475e+06	176542	395602	6.22919e+06	8	8	8	8	0.94229	0.665356	0.674663	0.664117
Q8C8R3	Ank2	Ankyrin-2	888	YSLEGGR	monophos-(888)YSLEGGR		190238	302973		81668.1		512112							68228.5			4	1	2	3	#DIV/0!	#DIV/0!	0.435773	0.901521
Q8C8R3	Ank2	Ankyrin-2	1073	EHFCDYTEDELNEILNGMDEVLDSPEDLEK	monophos-(1073)EHFCDYTEDELNEILNGMDEVLDSPEDLEK			411419														1	0	1	0	#DIV/0!	#DIV/0!	#DIV/0!	#DIV/0!
Q8C8R3	Ank2	Ankyrin-2	1424	ESESDQEPEEEIGMTSEK	monophos-(1424)ESESDQEPEEEIGMTSEK	648489	1.39186e+06	2.6794e+06	439356	512224	362414	2.02083e+06	454036	1.62268e+06	3.68779e+06	2.44486e+06	489633		327131	1.97418e+06	1.49451e+06	8	7	8	7	0.487084	0.232539	0.330535	0.23389
Q8C8R3	Ank2	Ankyrin-2	1546	SSQSERELEEEWVIVSDEEIQEAK	monophos-(1546)SSQSERELEEEWVIVSDEEIQEAK	62842.1	231112	827591	247698		64309			220994	311154	124358	264164	998056	79923.3	452579		5	7	8	4	0.92888	0.735907	0.152535	0.565402
Q8C8R3	Ank2	Ankyrin-2	1811	NEKLSPVSPSAK	diphos-(1811)NEKLSPVSPSAK	105272	977371	1.02698e+06	684032	399816	313384	1.00195e+06	1.0106e+06	679656	992771	732708	773756	581754	372559	1.01909e+06	673886	8	8	8	8	0.157377	0.803022	0.949182	0.624788
Q8C8R3	Ank2	Ankyrin-2	2229	VGTPTDIHSEK	monophos-(2229)VGTPTDIHSEK			443277				491351		132948	215304	169375				75358.3		2	4	4	2	0.788679	0.00240573	0.251059	0.806511
Q8C8R3	Ank2	Ankyrin-2	2363	SPQGLELPLPNR	monophos-(2363)SPQGLELPLPNR	511888	772676	1.4781e+06	1.42006e+06	219208	452928	2.38766e+06	1.36785e+06	1.13057e+06	738760		1.79491e+06	648459	522734	1.9897e+06	1.93597e+06	8	7	7	8	0.801517	0.629228	0.177915	0.848631
Q8C8R3	Ank2	Ankyrin-2	2467	LLRDPDGSAEDDSLEQTSLMESSGK	monophos-(2467)LLRDPDGSAEDDSLEQTSLMESSGK													217028				0	1	0	1	#DIV/0!	#DIV/0!	#DIV/0!	#DIV/0!
Q8C8R3	Ank2	Ankyrin-2	2648	VQPPSPLPSSIDSNSSPEEATQFQPIVPK	diphos-(2648)VQPPSPLPSSIDSNSSPEEATQFQPIVPK					285252								668474		259656		1	2	0	3	#DIV/0!	#DIV/0!	#DIV/0!	#DIV/0!
Q8C8R3	Ank2	Ankyrin-2	2809	CAIPEGNESAKEIASPSSPVK	diphos-(2809)CAIPEGNESAKEIASPSSPVK										1.86634e+06							0	1	1	0	#DIV/0!	#DIV/0!	#DIV/0!	#DIV/0!
Q8C8R3	Ank2	Ankyrin-2	3043	TPTEEGTPTSEQNPFLFQEGK	monophos-(3043)TPTEEGTPTSEQNPFLFQEGK													129101		198823		0	2	0	2	#DIV/0!	#DIV/0!	#DIV/0!	#DIV/0!
Q8C8R3	Ank2	Ankyrin-2	3359	ARSYIETETESR	monophos-(3359)ARSYIETETESR			193488		411584	126072		300441	458313				554867		438828	353439	4	4	2	6	0.513939	0.0417565	0.505772	0.769229
Q8C8R3	Ank2	Ankyrin-2	3652	ESESSDHPPMVSEEDISVGYSTFQDCLPK	diphos-(3652)ESESSDHPPMVSEEDISVGYSTFQDCLPK		118194												73667.8			1	1	1	1	#DIV/0!	#DIV/0!	#DIV/0!	#DIV/0!
Q8C8R3	Ank2	Ankyrin-2	3652	ESESSDHPPMVSEEDISVGYSTFQDCLPK	monophos-(3652)ESESSDHPPMVSEEDISVGYSTFQDCLPK									70140.1								0	1	1	0	#DIV/0!	#DIV/0!	#DIV/0!	#DIV/0!
Q8C8R3	Ank2	Ankyrin-2	3681	TEGDSPAAALSPQMHQEPVQQDFSGK	diphos-(3681)TEGDSPAAALSPQMHQEPVQQDFSGK			1.64885e+06	731990	2.54321e+06	372594	855143		1.52824e+06	1.26388e+06		1.04356e+06		746468	483003	674642	5	6	5	6	0.11289	0.504217	0.158958	0.466877
Q8C8R3	Ank2	Ankyrin-2	3681	TEGDSPAAALSPQMHQEPVQQDFSGK	monophos-(3681)TEGDSPAAALSPQMHQEPVQQDFSGK	560948	760234	2.4178e+06	774739	641203	382920	517000		1.88731e+06	2.42865e+06	449724	1.29489e+06	434648	692334	450297	457142	7	8	8	7	0.810266	0.708202	0.00012492	0.0265829
Q8C8R3	Ank2	Ankyrin-2	3707	TQDQQEYYVTTPGAEVEDPQK	monophos-(3707)TQDQQEYYVTTPGAEVEDPQK		913471	1.16482e+06		561888		972045		645058	459709	1.10409e+06		599685	2.67951e+06			4	5	5	4	0.0597756	0.69606	0.041629	0.546822
Q8C8R3	Ank2	Ankyrin-2	3728	ATAVPDSLCKTPEDISTPPEGTKPCLQTPVTSER	diphos-(3728)ATAVPDSLCKTPEDISTPPEGTKPCLQTPVTSER	387096	218608	2.31354e+06		3.84449e+06	262218			2.44955e+06		1.01876e+06		1.07963e+06				5	3	5	3	0.417991	0.917506	0.297744	0.670699
Q8C8R3	Ank2	Ankyrin-2	3738	TPEDISTPPEGTKPCLQTPVTSER	diphos-(3738)TPEDISTPPEGTKPCLQTPVTSER	123523	388113	402979		878897	70400.1			1.14227e+06	1.34525e+06			339574	190579			5	4	5	4	0.289252	0.244017	0.539505	0.352022
Q8C8R3	Ank2	Ankyrin-2	3738	TPEDISTPPEGTKPCLQTPVTSER	monophos-(3738)TPEDISTPPEGTKPCLQTPVTSER		809909	679808						482614	625210			244722	78015.6			2	4	4	2	0.538163	0.107224	0.896751	0.0127365
Q8C8R3	Ank2	Ankyrin-2	3762	GSPIVQEPEEASEPK	monophos-(3762)GSPIVQEPEEASEPK	1.97826e+06	1.59484e+06	2.74525e+06	1.3521e+06	3.99432e+06	1.0885e+06	3.02061e+06	2.29899e+06	8.11432e+06	8.23281e+06	1.4304e+06	4.77238e+06	1.59773e+06	1.37204e+06	2.30559e+06	5.78822e+06	8	8	8	8	0.00889703	0.111464	0.120943	0.36746
Q8C8R3	Ank2	Ankyrin-2	3783	KTSLVIVESTDDQSQVFER	monophos-(3783)KTSLVIVESTDDQSQVFER	203842	308012	1.69115e+06	341645	2.94486e+06	43601.5	2.09452e+06	281240	1.26396e+06	2.55089e+06	401876	682168	2.08684e+06	294433	62408.4	647425	8	8	8	8	0.604812	0.984134	0.43823	0.803897
G5E8K5	Ank3	Ankyrin-3	1097	NEDLAELLNGMDEELDSPEELGTKR	monophos-(1097)NEDLAELLNGMDEELDSPEELGTKR		74089.1	1.65229e+06						640696	117300	146819		134577	415800			2	5	5	2	0.0168893	0.599905	0.43708	0.64149
G5E8K5	Ank3	Ankyrin-3	1448	RQSFASLALR	monophos-(1448)RQSFASLALR		667110	1.02294e+06						714916		1.12987e+06		386927	298909			2	4	4	2	0.89601	0.521769	0.39553	0.0352018
Q6PD24	Ankrd13d	Ankyrin repeat domain-containing protein 13D	548	GPESPQKTPPSPAPPSFEEQLR	diphos-(548)GPESPQKTPPSPAPPSFEEQLR	1.93539e+06	2.27083e+06	3.33936e+06	2.47416e+06	3.21716e+06	1.85127e+06	1.66739e+06	1.62065e+06	2.9488e+06	2.53935e+06	2.30972e+06	2.63291e+06	1.7678e+06	1.48617e+06	2.46517e+06	2.05424e+06	8	8	8	8	0.399307	0.942282	0.476232	0.0514186
Q99NH0	Ankrd17	Ankyrin repeat domain-containing protein 17	2031	EHYPVSSPSSPSPPAQPGGVSR	diphos-(2031)EHYPVSSPSSPSPPAQPGGVSR					900751												1	0	0	1	#DIV/0!	#DIV/0!	#DIV/0!	#DIV/0!
Q505D1	Ankrd28	Serine/threonine-protein phosphatase 6 regulatory ankyrin repeat subunit A	1008	TVSFEALPIMR	monophos-(1008)TVSFEALPIMR							224879										1	0	0	1	#DIV/0!	#DIV/0!	#DIV/0!	#DIV/0!
Q3UUF8	Ankrd34b	Ankyrin repeat domain-containing protein 34B	257	VASLQEELQDITPEEEIAYK	monophos-(257)VASLQEELQDITPEEEIAYK	46908.6	71419.9			64014.7		329564						132641	70663.5	192430		4	3	2	5	0.348279	0.964865	0.236776	0.28258
Q3UUF8	Ankrd34b	Ankyrin repeat domain-containing protein 34B	358	NSGANHYSSDSQLAEGVTPPTVEDGK	monophos-(358)NSGANHYSSDSQLAEGVTPPTVEDGK	454008	524674	369547		294470	169835			238067	248220			127437	175773			5	4	5	4	0.173761	0.0618791	0.38348	0.0433163
Q3UUF8	Ankrd34b	Ankyrin repeat domain-containing protein 34B	493	RQSLQTEQIK	monophos-(493)RQSLQTEQIK	230612	450240	292476	313495	350614	147138	636899	422375	347833	340323	469862	407216	219756	145836	462861		8	7	8	7	0.625254	0.852278	0.0525074	0.828572
A2ARS0	Ankrd63	Ankyrin repeat domain-containing protein 63	187	GSNSDSPPGHPAPAPSPERR	diphos-(187)GSNSDSPPGHPAPAPSPERR	342182	491237	1.85863e+06	495410	630864		145903	1.09284e+06	212835	131540	1.74588e+06	480576		197250	86864.6	963518	7	7	8	6	0.905342	0.588355	0.352292	0.543707
A2ARS0	Ankrd63	Ankyrin repeat domain-containing protein 63	187	GSNSDSPPGHPAPAPSPER	monophos-(187)GSNSDSPPGHPAPAPSPER	789853		534226	987880				1.44193e+06	226314	351737	4.5263e+06	1.02983e+06				2.2025e+06	4	5	7	2	0.0302495	0.418837	0.537134	0.600254
A2ARS0	Ankrd63	Ankyrin repeat domain-containing protein 63	265	SMSLALGTMTEEETAR	monophos-(265)SMSLALGTMTEEETAR	177499	133828		236947	591245	115953	326641	817671		254120				170423		375621	7	3	4	6	0.275066	0.651609	0.0270581	0.127897
A2ARS0	Ankrd63	Ankyrin repeat domain-containing protein 63	283	AGALMARPNSPQSSGSGR	monophos-(283)AGALMARPNSPQSSGSGR	1.13977e+06		393896					417033			1.0011e+06					422167	3	2	3	2	0.872523	0.882733	0.0129426	0.204424
P59672	Anks1a	Ankyrin repeat and SAM domain-containing protein 1A	26	RLSSGFGGGGGGSGSGGGSGGGGLGSSSHPLSSLLSMWR	monophos-(26)RLSSGFGGGGGGSGSGGGSGGGGLGSSSHPLSSLLSMWR										382900					1.11876e+06		0	2	1	1	#DIV/0!	#DIV/0!	#DIV/0!	#DIV/0!
P59672	Anks1a	Ankyrin repeat and SAM domain-containing protein 1A	406	EAEATGTRAAGVRPR	monophos-(406)EAEATGTRAAGVRPR														82886.7	212954		0	2	0	2	#DIV/0!	#DIV/0!	#DIV/0!	#DIV/0!
P59672	Anks1a	Ankyrin repeat and SAM domain-containing protein 1A	442	KYFPLAASEGLAVRPR	diphos-(442)KYFPLAASEGLAVRPR						1.73974e+06											1	0	0	1	#DIV/0!	#DIV/0!	#DIV/0!	#DIV/0!
P59672	Anks1a	Ankyrin repeat and SAM domain-containing protein 1A	676	SPSFASEWDEIEK	monophos-(676)SPSFASEWDEIEK	232303	273385	451530	339683	2.49216e+06	254209	1.09831e+06	932910	381260	374347	697847	420241	251046	151378	2.82155e+06	1.01553e+06	8	8	8	8	0.753685	0.990817	3.37074e-05	0.0829258
Q8BIZ1	Anks1b	Ankyrin repeat and sterile alpha motif domain-containing protein 1B	733	NVSKSDSDLIAYPSK	monophos-(733)NVSKSDSDLIAYPSK		916499															1	0	1	0	#DIV/0!	#DIV/0!	#DIV/0!	#DIV/0!
Q8BIZ1	Anks1b	Ankyrin repeat and sterile alpha motif domain-containing protein 1B	771	TPSFTSEWEEIDK	monophos-(771)TPSFTSEWEEIDK		42156.9															1	0	1	0	#DIV/0!	#DIV/0!	#DIV/0!	#DIV/0!
Q8K298	Anln	Actin-binding protein anillin	629	DSNLSAASPKPGK	monophos-(629)DSNLSAASPKPGK											697417						0	1	1	0	#DIV/0!	#DIV/0!	#DIV/0!	#DIV/0!
Q8K298	Anln	Actin-binding protein anillin	650	AESADSLGSEDRDLLYSIDAYR	diphos-(650)AESADSLGSEDRDLLYSIDAYR		225867	3.92482e+06	1.10551e+06	2.75179e+06	181826	2.02032e+06	942514	201079	710915	896237	4.16572e+06	4.20038e+06	1.44309e+06	608256	1.06374e+06	7	8	7	8	0.742334	0.931695	0.507101	0.952538
Q6PB70	Ano8	Anoctamin-8	643	GLEPGVFTLAEEDDEPEGPPGSPGPEPQTVLLR	monophos-(643)GLEPGVFTLAEEDDEPEGPPGSPGPEPQTVLLR		43600							62699.3	106762			76094.3				1	3	3	1	#DIV/0!	#DIV/0!	#DIV/0!	#DIV/0!
P61967	Ap1s1	AP-1 complex subunit sigma-1A	133	AIEQADLLQEEDESPRSVLEEMGLA	monophos-(133)AIEQADLLQEEDESPRSVLEEMGLA		817903	233398				432200			1294575	264454	131621	250468				3	4	5	2	0.478243	0.980101	0.383488	0.603744
P17426	Ap2a1	AP-2 complex subunit alpha-1	516	SSPPVQFSLLHSK	monophos-(516)SSPPVQFSLLHSK			414630											77551			1	1	1	1	#DIV/0!	#DIV/0!	#DIV/0!	#DIV/0!
P17426	Ap2a1	AP-2 complex subunit alpha-1	633	DTSSNDINGGVEPTPSTVSTPSPSADLLGLR	diphos-(633)DTSSNDINGGVEPTPSTVSTPSPSADLLGLR										614681				183192			0	2	1	1	#DIV/0!	#DIV/0!	#DIV/0!	#DIV/0!
P17426	Ap2a1	AP-2 complex subunit alpha-1	633	DTSSNDINGGVEPTPSTVSTPSPSADLLGLR	monophos-(633)DTSSNDINGGVEPTPSTVSTPSPSADLLGLR			165559											75435.1			1	1	1	1	#DIV/0!	#DIV/0!	#DIV/0!	#DIV/0!
P84091	Ap2m1	AP-2 complex subunit mu	145	EEQSQITSQVTGQIGWR	monophos-(145)EEQSQITSQVTGQIGWR	27223.1												34490.6				1	1	1	1	#DIV/0!	#DIV/0!	#DIV/0!	#DIV/0!
Q9JME5	Ap3b2	AP-3 complex subunit beta-2	267	AFYGSEEDEAKGPGSEEAATAALPAR	diphos-(267)AFYGSEEDEAKGPGSEEAATAALPAR	125886	211595	798488	335224		158838	257509	163678	1.09143e+06	256184	317410	339095	296677	170657		298914	7	7	8	6	0.502006	0.498624	0.00284739	0.121211
Q9JME5	Ap3b2	AP-3 complex subunit beta-2	267	AFYGSEEDEAKGPGSEEAATAALPAR	monophos-(267)AFYGSEEDEAKGPGSEEAATAALPAR	1.467e+06	3.9179e+06	7.77677e+06	3.06432e+06	7.08813e+06	472899	3.80021e+06	1.4256e+06	4.92208e+06	1.10846e+07	4.94395e+06	4.06828e+06	1.47569e+06	1.23469e+06	1.53694e+06	3.32763e+06	8	8	8	8	0.62057	0.765702	0.398864	0.0648758
O54774	Ap3d1	AP-3 complex subunit delta-1	613	KVPVPEGLDLDAWINEPPSDSESEDEKPK	diphos-(613)KVPVPEGLDLDAWINEPPSDSESEDEKPK			708921										1.21411e+06				1	1	1	1	#DIV/0!	#DIV/0!	#DIV/0!	#DIV/0!
O54774	Ap3d1	AP-3 complex subunit delta-1	751	RHSSLPTESDEDIAPAQR	diphos-(751)RHSSLPTESDEDIAPAQR			444827		467188					517826			533552				2	2	2	2	0.780412	0.0363904	0.939432	0.736652
O54774	Ap3d1	AP-3 complex subunit delta-1	751	RHSSLPTESDEDIAPAQR	monophos-(751)RHSSLPTESDEDIAPAQR													702174				0	1	0	1	#DIV/0!	#DIV/0!	#DIV/0!	#DIV/0!
O54774	Ap3d1	AP-3 complex subunit delta-1	752	HSSLPTESDEDIAPAQR	diphos-(752)HSSLPTESDEDIAPAQR	135062	1.2015e+06	3.0389e+06	512982	1.14927e+06				763091	2.60583e+06	491701	773947	2.23069e+06		875268		5	6	8	3	0.625173	0.894334	0.70038	0.742099
O54774	Ap3d1	AP-3 complex subunit delta-1	752	HSSLPTESDEDIAPAQR	monophos-(752)HSSLPTESDEDIAPAQR	376181	3.58849e+06	2.83928e+06	961872	2.75001e+06	126299	1.19703e+06	426637	2.08766e+06	4.43095e+06	649283	621422	1.93073e+06	361429	546986	565942	8	8	8	8	0.904589	0.847022	0.193911	0.152947
O54774	Ap3d1	AP-3 complex subunit delta-1	769	VDIITEEMPENALPSDEDDKDPNDPYR	monophos-(769)VDIITEEMPENALPSDEDDKDPNDPYR	700217	1.7736e+06	3.00438e+06	793271	1.41528e+06	182586	531588	363375	1.40642e+06	3.31234e+06	524122	1.23441e+06	2.18158e+06	302825	450330	1.16243e+06	8	8	8	8	0.842489	0.649778	0.305889	0.106483
O54774	Ap3d1	AP-3 complex subunit delta-1	1085	LHFSCSSYLITTPCYSDAFAKLLESGDLSMNSIK	diphos-(1085)LHFSCSSYLITTPCYSDAFAKLLESGDLSMNSIK								2.10659e+06									1	0	0	1	#DIV/0!	#DIV/0!	#DIV/0!	#DIV/0!
B2RUJ5	Apba1	Amyloid beta A4 precursor protein-binding family A member 1	81	SASTESGFHNHTDTAEGDVLAAAR	diphos-(81)SASTESGFHNHTDTAEGDVLAAAR	1.02459e+06	1.49024e+06	303645	266143	1.71419e+06	2.34486e+06		1.60983e+06	1.1848e+06	1.20104e+06	2.03675e+06		831522	2.69924e+06	1.34797e+06	815154	7	7	7	7	0.799902	0.625567	0.772068	0.15113
B2RUJ5	Apba1	Amyloid beta A4 precursor protein-binding family A member 1	81	SASTESGFHNHTDTAEGDVLAAAR	monophos-(81)SASTESGFHNHTDTAEGDVLAAAR	495694	859341	699155	365884		276921		362352	872311	779590	866592	753710	665665	575408	166749	1.07806e+06	6	8	8	6	0.721783	0.1491	0.170182	0.193636
B2RUJ5	Apba1	Amyloid beta A4 precursor protein-binding family A member 1	238	LHHYDERSDGESDSPEK	monophos-(238)LHHYDERSDGESDSPEK			67350	302857					74198.8							494332	2	2	3	1	0.650509	0.720443	#DIV/0!	#DIV/0!
B2RUJ5	Apba1	Amyloid beta A4 precursor protein-binding family A member 1	245	SDGESDSPEKEAEFAPYPR	diphos-(245)SDGESDSPEKEAEFAPYPR								563804						152260	1.03321e+06		1	2	0	3	#DIV/0!	#DIV/0!	#DIV/0!	#DIV/0!
B2RUJ5	Apba1	Amyloid beta A4 precursor protein-binding family A member 1	264	MDSYEQEEDIDQIVAEVK	monophos-(264)MDSYEQEEDIDQIVAEVK	513040	632536	1.44544e+06	2.25366e+06		624168	2.5546e+06	1.84895e+06	970712	956890	2.19022e+06	2.01559e+06	1.03274e+06	774808	1.73794e+06	4.52273e+06	7	8	8	7	0.369461	0.521593	0.112542	0.377652
B2RUJ5	Apba1	Amyloid beta A4 precursor protein-binding family A member 1	282	QSMSSQSLDKAAEDMPEAEQDLER	diphos-(282)QSMSSQSLDKAAEDMPEAEQDLER	530459	282149	1.00747e+06	346396		874024	1.01749e+06	724084	934708		1.21557e+06	281838	219608	1.38314e+06	487968	796916	7	7	7	7	0.356755	0.715191	0.920001	0.537066
B2RUJ5	Apba1	Amyloid beta A4 precursor protein-binding family A member 1	292	AAEDMPEAEQDLERAPTPGGGHPDSPGLPAPAGQQQR	diphos-(292)AAEDMPEAEQDLERAPTPGGGHPDSPGLPAPAGQQQR	2.00394e+06	2.13626e+06	2.0477e+06	1.50229e+06	1.32684e+06	1.66664e+06	3.92284e+06	2.26102e+06	2.85391e+06	2.69812e+06	4.66386e+06	2.94316e+06	594562	1.603e+06	1.60122e+06	2.22485e+06	8	8	8	8	0.298611	0.58217	0.990542	0.166786
B2RUJ5	Apba1	Amyloid beta A4 precursor protein-binding family A member 1	306	APTPGGGHPDSPGLPAPAGQQQR	monophos-(306)APTPGGGHPDSPGLPAPAGQQQR	496953						433027		1.08637e+06	639337				122490	577953	862772	2	5	3	4	0.187628	0.507244	0.93131	0.350868
B2RUJ5	Apba1	Amyloid beta A4 precursor protein-binding family A member 1	371	SPYTPDEPKEPIWVMR	monophos-(371)SPYTPDEPKEPIWVMR	54247.4															385989	1	1	1	1	#DIV/0!	#DIV/0!	#DIV/0!	#DIV/0!
B2RUJ5	Apba1	Amyloid beta A4 precursor protein-binding family A member 1	570	SNSQENVEASHPSQDGKR	monophos-(570)SNSQENVEASHPSQDGKR	492364	310044	1.74678e+06	668049	20947	242776	420543	520066	604903	639377	3.70845e+06	716000	275619	603775		1.99253e+06	8	7	8	7	0.0405306	0.218342	0.197387	0.298392
P98084	Apba2	Amyloid beta A4 precursor protein-binding family A member 2	478	SASQDCIETTPGAQEGKK	monophos-(478)SASQDCIETTPGAQEGKK	227274	1.33981e+06	190710		244345	247607					435128			102383			5	2	4	3	0.677609	0.655997	0.0464866	0.285722
Q9QXJ1	Apbb1	Amyloid beta A4 precursor protein-binding family B member 1	318	DEPSEEAPMELGLKDPEEATLSFPAQSLSPEPVPQEEEK	monophos-(318)DEPSEEAPMELGLKDPEEATLSFPAQSLSPEPVPQEEEK									94958.7							202110	0	2	1	1	#DIV/0!	#DIV/0!	#DIV/0!	#DIV/0!
Q9QXJ1	Apbb1	Amyloid beta A4 precursor protein-binding family B member 1	616	DVHTFAFIMAAGPASFCCHMFWCEPNAASLSEAVQAACMLRYQK	diphos-(616)DVHTFAFIMAAGPASFCCHMFWCEPNAASLSEAVQAACMLRYQK											181045						0	1	1	0	#DIV/0!	#DIV/0!	#DIV/0!	#DIV/0!
Q61315	Apc	Adenomatous polyposis coli protein	668	SHSLTIVSNACGTLWNLSAR	diphos-(668)SHSLTIVSNACGTLWNLSAR							1.02795e+07										1	0	0	1	#DIV/0!	#DIV/0!	#DIV/0!	#DIV/0!
Q61315	Apc	Adenomatous polyposis coli protein	756	ALEAELDAQHLSETFDNIDNLSPK	monophos-(756)ALEAELDAQHLSETFDNIDNLSPK	67192.9	79792.5						280270	118088	152768			111089				3	3	4	2	0.0673589	0.840205	0.108008	0.19951
Q61315	Apc	Adenomatous polyposis coli protein	1369	SPPEHYVQETPLVFSR	monophos-(1369)SPPEHYVQETPLVFSR							463616										1	0	0	1	#DIV/0!	#DIV/0!	#DIV/0!	#DIV/0!
Q61315	Apc	Adenomatous polyposis coli protein	1434	SKTPPPPPQTVQAK	monophos-(1434)SKTPPPPPQTVQAK	85541.2	81988.1	224674						153166								3	1	4	0	#DIV/0!	#DIV/0!	#DIV/0!	#DIV/0!
Q61315	Apc	Adenomatous polyposis coli protein	1856	NDSLSSLDFDDDDVDLSR	diphos-(1856)NDSLSSLDFDDDDVDLSR							469456	224727						134536			2	1	0	3	#DIV/0!	#DIV/0!	#DIV/0!	#DIV/0!
Q61315	Apc	Adenomatous polyposis coli protein	1856	NDSLSSLDFDDDDVDLSR	monophos-(1856)NDSLSSLDFDDDDVDLSR		106236	524869	266369		103947	374795	281518		260256	217141		121095	128219	296469	320561	6	6	5	7	0.181809	0.497713	0.456716	0.587874
Q61315	Apc	Adenomatous polyposis coli protein	2706	QSVGSGSPVQTVGLETR	monophos-(2706)QSVGSGSPVQTVGLETR									239961					64076.8			0	2	1	1	#DIV/0!	#DIV/0!	#DIV/0!	#DIV/0!
Q61315	Apc	Adenomatous polyposis coli protein	2794	SSADSTSARPSQIPTPVSTNTKK	diphos-(2794)SSADSTSARPSQIPTPVSTNTKK							217794										1	0	0	1	#DIV/0!	#DIV/0!	#DIV/0!	#DIV/0!
P08226	Apoe	Apolipoprotein E	129	NEVHTMLGQSTEEIR	monophos-(129)NEVHTMLGQSTEEIR	122724	143960			302734		455838	359513	274506	111956						667614	5	3	4	4	0.219811	0.631551	0.246063	0.0187167
Q8K3H0	Appl1	DCC-interacting protein 13-alpha	389	VNQSALEAVTPSPSFQQR	monophos-(389)VNQSALEAVTPSPSFQQR		591040															1	0	1	0	#DIV/0!	#DIV/0!	#DIV/0!	#DIV/0!
P55088	Aqp4	Aquaporin-4	274	GSYMEVEDNRSQVETEDLILKPGVVHVIDIDR	monophos-(274)GSYMEVEDNRSQVETEDLILKPGVVHVIDIDR			255068														1	0	1	0	#DIV/0!	#DIV/0!	#DIV/0!	#DIV/0!
Q9EPJ9	Arfgap1	ADP-ribosylation factor GTPase-activating protein 1	122	EWSLESSPAQNWTPPQPK	monophos-(122)EWSLESSPAQNWTPPQPK	137616	366239	873904		2.76101e+06	115861	394882	165785	359757	244956	850749	366579	147031	209133	238992	631264	7	8	7	8	0.00198725	0.434806	0.0135574	0.716304
Q9EPJ9	Arfgap1	ADP-ribosylation factor GTPase-activating protein 1	148	ASGQPQSAAASGDKAFEDWLNDDLGSYQGAQENR	monophos-(148)ASGQPQSAAASGDKAFEDWLNDDLGSYQGAQENR					43114.2												1	0	0	1	#DIV/0!	#DIV/0!	#DIV/0!	#DIV/0!
Q9EPJ9	Arfgap1	ADP-ribosylation factor GTPase-activating protein 1	297	AEDSSDRPLEGHSYQNSSGDNSQNSNIDQSFWETFGSAEPPK	diphos-(297)AEDSSDRPLEGHSYQNSSGDNSQNSNIDQSFWETFGSAEPPK					828471												1	0	0	1	#DIV/0!	#DIV/0!	#DIV/0!	#DIV/0!
Q9EPJ9	Arfgap1	ADP-ribosylation factor GTPase-activating protein 1	297	AEDSSDRPLEGHSYQNSSGDNSQNSNIDQSFWETFGSAEPPK	monophos-(297)AEDSSDRPLEGHSYQNSSGDNSQNSNIDQSFWETFGSAEPPK					76057.9												1	0	0	1	#DIV/0!	#DIV/0!	#DIV/0!	#DIV/0!
Q9EPJ9	Arfgap1	ADP-ribosylation factor GTPase-activating protein 1	339	AKSPSSDSWTCADASTGR	diphos-(339)AKSPSSDSWTCADASTGR	735772	1.83383e+06	5.37346e+06	182158	1.47205e+06	315082			613415	128916	1.52484e+06	282286	315989	1.36032e+06	184192	469369	6	8	8	6	0.00402687	0.250103	0.026087	0.35242
Q9EPJ9	Arfgap1	ADP-ribosylation factor GTPase-activating protein 1	339	AKSPSSDSWTCADASTGR	monophos-(339)AKSPSSDSWTCADASTGR	1.34745e+06	3.01813e+06	3.44606e+06	282970	2.55516e+06	677169	523255	315074	3.42319e+06	1.63939e+06	3.02763e+06	522672	1.00648e+06	984248	900214	738637	8	8	8	8	0.675025	0.987406	0.112716	0.0479866
Q9EPJ9	Arfgap1	ADP-ribosylation factor GTPase-activating protein 1	341	SPSSDSWTCADASTGR	diphos-(341)SPSSDSWTCADASTGR	261889	1.31318e+06	1.90873e+06	841895	733310	346510			973786	1.04434e+06	1.55324e+06			668467	1.18743e+06	925923	6	6	7	5	0.129245	0.586637	0.323962	0.211975
Q9EPJ9	Arfgap1	ADP-ribosylation factor GTPase-activating protein 1	357	RSSDSWDVWGSGSASNNK	monophos-(357)RSSDSWDVWGSGSASNNK	1.68604e+06	5.5628e+06	5.53853e+06	1.64345e+06	1.03875e+07	2.22418e+06	5.45825e+06	1.34977e+06	3.2415e+06	2.24178e+06	4.89718e+06	2.35308e+06	3.35907e+06	2.06397e+06	2.60625e+06	2.96693e+06	8	8	8	8	0.00426243	0.303031	0.170318	0.738763
Q9EPJ9	Arfgap1	ADP-ribosylation factor GTPase-activating protein 1	375	NSNSDGWESWEGASGEGR	monophos-(375)NSNSDGWESWEGASGEGR	160154	186264	579355		395720				397816	89806.7	265297		165537	135652			4	5	6	3	0.384761	0.298462	0.851559	0.70547
Q99K28	Arfgap2	ADP-ribosylation factor GTPase-activating protein 2	128	HGTDLWIDSMNSAPSHSPEKK	monophos-(128)HGTDLWIDSMNSAPSHSPEKK			1.03475e+06														1	0	1	0	#DIV/0!	#DIV/0!	#DIV/0!	#DIV/0!
Q99K28	Arfgap2	ADP-ribosylation factor GTPase-activating protein 2	428	AISSDMFFGR	monophos-(428)AISSDMFFGR		71945.8	187287		45381.9		309462										4	0	2	2	#DIV/0!	#DIV/0!	0.524313	0.771593
G3X9K3	Arfgef1	Brefeldin A-inhibited guanine nucleotide-exchange protein 1	1565	SVDIHDSIQPR	monophos-(1565)SVDIHDSIQPR		338553			136290								115176				2	1	1	2	#DIV/0!	#DIV/0!	#DIV/0!	#DIV/0!
A2A5R2	Arfgef2	Brefeldin A-inhibited guanine nucleotide-exchange protein 2	206	ELEKPMQSKPQSPVIQATAGSPK	diphos-(206)ELEKPMQSKPQSPVIQATAGSPK	588447	1.52402e+06	2.65826e+06		1.40494e+06		994671		1.21356e+06	1.93143e+06	1.63615e+06	670252				1.02211e+06	5	5	7	3	0.410202	0.744364	0.188435	0.4875
A2A5R2	Arfgef2	Brefeldin A-inhibited guanine nucleotide-exchange protein 2	206	ELEKPMQSKPQSPVIQATAGSPK	monophos-(206)ELEKPMQSKPQSPVIQATAGSPK		390990	748756						750402		332360		130884			257437	2	4	4	2	0.830579	0.427529	0.564556	0.105348
A2A5R2	Arfgef2	Brefeldin A-inhibited guanine nucleotide-exchange protein 2	351	QSLSSADNLEPDVQGHQVAAR	monophos-(351)QSLSSADNLEPDVQGHQVAAR			295420							275549	415678						1	2	3	0	#DIV/0!	#DIV/0!	#DIV/0!	#DIV/0!
A2A5R2	Arfgef2	Brefeldin A-inhibited guanine nucleotide-exchange protein 2	618	RCSVTSVESTVSSGTQTAIQDDPEQFEVIK	diphos-(618)RCSVTSVESTVSSGTQTAIQDDPEQFEVIK	132862	383970	449215						82160.7	172414	260157		102350				3	4	6	1	0.262629	0.133383	#DIV/0!	#DIV/0!
A2A5R2	Arfgef2	Brefeldin A-inhibited guanine nucleotide-exchange protein 2	618	RCSVTSVESTVSSGTQTAIQDDPEQFEVIK	monophos-(618)RCSVTSVESTVSSGTQTAIQDDPEQFEVIK									101462	107291							0	2	2	0	#DIV/0!	#DIV/0!	#DIV/0!	#DIV/0!
A2A5R2	Arfgef2	Brefeldin A-inhibited guanine nucleotide-exchange protein 2	1529	GQSQLSNPTDDSWK	monophos-(1529)GQSQLSNPTDDSWK				223492	118772		1.05957e+06			389431		242582	125095			275356	3	4	3	4	0.0312876	0.556946	0.0790457	0.701035
Q3UGY8	Arfgef3	Brefeldin A-inhibited guanine nucleotide-exchange protein 3	275	TITSAHSTSTSTSMESDSASLGVSDHGRGSGCSCTAPTLSGPVAR	monophos-(275)TITSAHSTSTSTSMESDSASLGVSDHGRGSGCSCTAPTLSGPVAR		6309.67					262190			8544.78						33986.8	2	2	2	2	0.126182	0.472212	0.0124702	0.433855
Q3UGY8	Arfgef3	Brefeldin A-inhibited guanine nucleotide-exchange protein 3	462	DGAESSRDSMEINEADFR	monophos-(462)DGAESSRDSMEINEADFR	140473	176693	375920			64067.1			725688	367896	264132		119498	146563			4	5	6	3	0.343038	0.356665	0.0771392	0.111282
Q3UGY8	Arfgef3	Brefeldin A-inhibited guanine nucleotide-exchange protein 3	1639	VAAPSSSPSAEAEYWR	monophos-(1639)VAAPSSSPSAEAEYWR	339802	691977				351004	781449		489177	1.17125e+06	490825		678674	613322			4	5	5	4	0.763261	0.426151	0.377716	0.872393
Q3UGY8	Arfgef3	Brefeldin A-inhibited guanine nucleotide-exchange protein 3	2050	GPDSPLLQRPQHLIDQGQMR	monophos-(2050)GPDSPLLQRPQHLIDQGQMR		277225	527013						346414								2	1	3	0	#DIV/0!	#DIV/0!	#DIV/0!	#DIV/0!
Q3UGY8	Arfgef3	Brefeldin A-inhibited guanine nucleotide-exchange protein 3	2084	RPRSGSTGSSLSVSVR	diphos-(2084)RPRSGSTGSSLSVSVR		84139.9															1	0	1	0	#DIV/0!	#DIV/0!	#DIV/0!	#DIV/0!
Q3UGY8	Arfgef3	Brefeldin A-inhibited guanine nucleotide-exchange protein 3	2087	SGSTGSSLSVSVR	diphos-(2087)SGSTGSSLSVSVR					213249												1	0	0	1	#DIV/0!	#DIV/0!	#DIV/0!	#DIV/0!
Q8K221	Arfip2	Arfaptin-2	69	HPSHSTSPSGPGDEVAR	diphos-(69)HPSHSTSPSGPGDEVAR	78358	39963.9	131773		94743.1						369229		62045.7		218926	138611	4	4	4	4	0.0715343	0.15569	0.233712	0.757833
Q8K221	Arfip2	Arfaptin-2	69	HPSHSTSPSGPGDEVAR	monophos-(69)HPSHSTSPSGPGDEVAR	605404	737866	1.48912e+06		1.49052e+06		1.5529e+06	3.43248e+06	1.1303e+06	740671	2.99134e+06	1.43901e+06	864832		2.38212e+06	2.21823e+06	6	7	7	6	0.693619	0.806892	0.831355	0.177677
Q5FWK3	Arhgap1	Rho GTPase-activating protein 1	24	LASIDEK	monophos-(24)LASIDEK	311497	215445		487735	180463	60613.5	282275		191162		975872	413290		108474	267238	624454	6	6	6	6	0.0989697	0.256762	0.443394	0.242804
Q5FWK3	Arhgap1	Rho GTPase-activating protein 1	43	SDDSKSSSPEPVTHLK	diphos-(43)SDDSKSSSPEPVTHLK	2.76067e+06	5.69848e+06	6.47911e+06	1.65475e+06	2.9811e+06	744844		7.28329e+06	3.19592e+06	937259	9.45758e+06	5.85225e+06	883868	1.66327e+06	2.54168e+06	4.39569e+06	7	8	8	7	0.746505	0.82143	0.613535	0.265416
Q5FWK3	Arhgap1	Rho GTPase-activating protein 1	48	SSSPEPVTHLK	monophos-(48)SSSPEPVTHLK	439315	927888	1.61995e+06	468108	640403		1.31535e+06	224341	834855	487773	1.75424e+06		239302			296441	7	5	7	5	0.626926	0.805233	0.773666	0.226801
Q8C0D4	Arhgap12	Rho GTPase-activating protein 12	226	ATTPPNQGRPDSPVYANLQELK	diphos-(226)ATTPPNQGRPDSPVYANLQELK			4.40134e+06		2.79043e+06									1.72264e+06			2	1	1	2	#DIV/0!	#DIV/0!	#DIV/0!	#DIV/0!
Q3UIA2	Arhgap17	Rho GTPase-activating protein 17	719	LGEQGPEPGPTPPQTPTPPSTPPLAK	diphos-(719)LGEQGPEPGPTPPQTPTPPSTPPLAK					325026												1	0	0	1	#DIV/0!	#DIV/0!	#DIV/0!	#DIV/0!
Q6IFT4	Arhgap20	Rho GTPase-activating protein 20	795	SKPVPISVASYSHGSSQDHPRK	diphos-(795)SKPVPISVASYSHGSSQDHPRK				1.96662e+06	2.47152e+06			869331									3	0	1	2	#DIV/0!	#DIV/0!	#DIV/0!	#DIV/0!
Q6DFV3	Arhgap21	Rho GTPase-activating protein 21	31	DGKDQGEPVSPSEDEPFSWPGPK	monophos-(31)DGKDQGEPVSPSEDEPFSWPGPK	877903	621085	1.14851e+06	1.7458e+06	252550	263287	2.58262e+06	934655	1.23105e+06	764656	1.32047e+06	744367	314276	623131	1.1841e+06	2.53221e+06	8	8	8	8	0.703199	0.923233	0.0232743	0.938434
Q6DFV3	Arhgap21	Rho GTPase-activating protein 21	450	SVSQERLEDSVLMK	monophos-(450)SVSQERLEDSVLMK						150882											1	0	0	1	#DIV/0!	#DIV/0!	#DIV/0!	#DIV/0!
Q6DFV3	Arhgap21	Rho GTPase-activating protein 21	468	SASQGALTSPPVSFNNHR	monophos-(468)SASQGALTSPPVSFNNHR	133164		294879														2	0	2	0	#DIV/0!	#DIV/0!	#DIV/0!	#DIV/0!
Q6DFV3	Arhgap21	Rho GTPase-activating protein 21	684	TSPQLSENLGTSDLELPAIPR	monophos-(684)TSPQLSENLGTSDLELPAIPR		73482.2	229214	150525			407016	165408		96214.1	140494			62810.2	237483		5	4	5	4	0.432264	0.357239	0.121468	0.292859
Q6DFV3	Arhgap21	Rho GTPase-activating protein 21	846	RQLSHDQESVGPPSLDGQHSSK	monophos-(846)RQLSHDQESVGPPSLDGQHSSK	247225		870048					760544			369731					1.36961e+06	3	2	3	2	0.334702	0.623888	0.643539	0.187427
Q6DFV3	Arhgap21	Rho GTPase-activating protein 21	943	VGGSIRPWK	monophos-(943)VGGSIRPWK		213579				80007.2		217005								245144	3	1	1	3	#DIV/0!	#DIV/0!	#DIV/0!	#DIV/0!
Q6DFV3	Arhgap21	Rho GTPase-activating protein 21	1086	TQSPHSPKEESER	monophos-(1086)TQSPHSPKEESER						5684.86											1	0	0	1	#DIV/0!	#DIV/0!	#DIV/0!	#DIV/0!
Q6DFV3	Arhgap21	Rho GTPase-activating protein 21	1118	GIPSIVR	monophos-(1118)GIPSIVR	120180			217565													2	0	2	0	#DIV/0!	#DIV/0!	#DIV/0!	#DIV/0!
Q69ZH9	Arhgap23	Rho GTPase-activating protein 23	348	ARSDDYLSR	monophos-(348)ARSDDYLSR			424376	881796	2.25195e+06		5.49749e+06				2.02319e+06			263222			4	2	3	3	0.750409	0.567481	0.177054	0.38388
Q69ZH9	Arhgap23	Rho GTPase-activating protein 23	360	SAEALGPGALVSPR	diphos-(360)SAEALGPGALVSPR	374541	603681	996340	2.28015e+06	1.33173e+06	644599	2.58733e+06	1.82365e+06	372098	578593	1.12445e+06	1.37608e+06	563515	677686	1.73815e+06	1.6255e+06	8	8	8	8	0.265511	0.366146	0.799312	0.246201
Q69ZH9	Arhgap23	Rho GTPase-activating protein 23	360	SAEALGPGALVSPR	monophos-(360)SAEALGPGALVSPR	503986	580622	1.11115e+06	1.60779e+06	876298	381416	1.69715e+06	1.26446e+06	939289	950633	1.23799e+06	2.0137e+06	414009	345123	1.69181e+06		8	7	8	7	0.593169	0.781488	0.644496	0.573356
Q69ZH9	Arhgap23	Rho GTPase-activating protein 23	528	VAPLATTEDSLASIPFIDEPTSPSIDLQAK	monophos-(528)VAPLATTEDSLASIPFIDEPTSPSIDLQAK				163289		50662.7	154450				175146						3	1	2	2	#DIV/0!	#DIV/0!	0.144825	0.330024
Q69ZH9	Arhgap23	Rho GTPase-activating protein 23	591	HYSQDCSSIK	monophos-(591)HYSQDCSSIK											103232			34215.1			0	2	1	1	#DIV/0!	#DIV/0!	#DIV/0!	#DIV/0!
Q69ZH9	Arhgap23	Rho GTPase-activating protein 23	616	SKSCDDGLNTFR	monophos-(616)SKSCDDGLNTFR					2.91335e+07						235818						1	1	1	1	#DIV/0!	#DIV/0!	#DIV/0!	#DIV/0!
Q69ZH9	Arhgap23	Rho GTPase-activating protein 23	648	SFFTDGSLDSWGTSEDADAPSK	diphos-(648)SFFTDGSLDSWGTSEDADAPSK		74126	199520	217616		63786.8		356862			870226			164743	1.13048e+06		5	3	4	4	0.0214987	0.199074	0.637445	0.778398
Q69ZH9	Arhgap23	Rho GTPase-activating protein 23	670	RHSTSDLSDATFSDIR	monophos-(670)RHSTSDLSDATFSDIR											623321						0	1	1	0	#DIV/0!	#DIV/0!	#DIV/0!	#DIV/0!
Q69ZH9	Arhgap23	Rho GTPase-activating protein 23	1102	TPVDDKEPQSVPNIEYLLPNIGR	diphos-(1102)TPVDDKEPQSVPNIEYLLPNIGR								53322.9									1	0	0	1	#DIV/0!	#DIV/0!	#DIV/0!	#DIV/0!
Q8BYW1	Arhgap25	Rho GTPase-activating protein 25	378	SSVGWDATEDPPLSR	monophos-(378)SSVGWDATEDPPLSR															764944		0	1	0	1	#DIV/0!	#DIV/0!	#DIV/0!	#DIV/0!
Q8BYW1	Arhgap25	Rho GTPase-activating protein 25	393	TDSFSNTASSPDATSPTGPLPSDQHQEDSGK	diphos-(393)TDSFSNTASSPDATSPTGPLPSDQHQEDSGK	191629										382327						1	1	2	0	#DIV/0!	#DIV/0!	#DIV/0!	#DIV/0!
Q8BYW1	Arhgap25	Rho GTPase-activating protein 25	393	TDSFSNTASSPDATSPTGPLPSDQHQEDSGK	monophos-(393)TDSFSNTASSPDATSPTGPLPSDQHQEDSGK											114622						0	1	1	0	#DIV/0!	#DIV/0!	#DIV/0!	#DIV/0!
A6X8Z5	Arhgap31	Rho GTPase-activating protein 31	762	NLSPPLTPAPPPPTPLEEEPEVLLSK	monophos-(762)NLSPPLTPAPPPPTPLEEEPEVLLSK	34277.3								88743.2								1	1	2	0	#DIV/0!	#DIV/0!	#DIV/0!	#DIV/0!
Q811P8	Arhgap32	Rho GTPase-activating protein 32	679	NESEPSEMK	monophos-(679)NESEPSEMK	43991.8																1	0	1	0	#DIV/0!	#DIV/0!	#DIV/0!	#DIV/0!
Q811P8	Arhgap32	Rho GTPase-activating protein 32	702	SAKSEESLTSLHAVDGDSK	diphos-(702)SAKSEESLTSLHAVDGDSK		260000	1.66982e+06				795797							793603			3	1	2	2	#DIV/0!	#DIV/0!	0.00198165	0.849166
Q811P8	Arhgap32	Rho GTPase-activating protein 32	702	SAKSEESLTSLHAVDGDSK	monophos-(702)SAKSEESLTSLHAVDGDSK	1.40908e+06	1.88611e+06	2.92237e+06	1.58772e+06	2.4976e+06	2.36146e+06	7.73176e+06	1.11102e+06	3.76867e+06	5.77264e+06	2.09849e+06	5.47748e+06	2.46601e+06	5.73296e+06	3.44642e+06	1.63467e+06	8	8	8	8	0.557582	0.266114	0.504997	0.80098
Q811P8	Arhgap32	Rho GTPase-activating protein 32	834	DAEAGGSQSQTPGSTASSEPVSPVQEK	diphos-(834)DAEAGGSQSQTPGSTASSEPVSPVQEK			292285		163243									91163.1			2	1	1	2	#DIV/0!	#DIV/0!	#DIV/0!	#DIV/0!
Q811P8	Arhgap32	Rho GTPase-activating protein 32	834	DAEAGGSQSQTPGSTASSEPVSPVQEK	monophos-(834)DAEAGGSQSQTPGSTASSEPVSPVQEK	274198	424223	647500		310958		393270		548643	700207	506967		190600	182566			5	5	6	4	0.399786	0.900183	0.519568	0.0231752
Q811P8	Arhgap32	Rho GTPase-activating protein 32	861	LSPFFTLDLSPTDDK	monophos-(861)LSPFFTLDLSPTDDK	72226.9	86497.7	334544	300094		93888.1	169592	235401	135202	146459	312590	294383	130488	111847	272045	374247	7	8	8	7	0.885291	0.499737	0.851847	0.830144
Q811P8	Arhgap32	Rho GTPase-activating protein 32	901	SPSMNISEPISVTLPPR	monophos-(901)SPSMNISEPISVTLPPR	234888	650388		713526	176946	37508.6	103310						87229.5		1.12508e+06		6	2	3	5	0.104206	0.413077	0.512062	0.471986
Q811P8	Arhgap32	Rho GTPase-activating protein 32	946	DVINRSPTQLQLGK	monophos-(946)DVINRSPTQLQLGK	1.24313e+06	2.08084e+06	2.6592e+06	2.87345e+06	2.75725e+06	603802	2.46901e+06	1.18399e+06	1.90318e+06	2.84713e+06	1.67667e+06	2.09952e+06	1.02302e+06	1.06773e+06	1.72047e+06	2.23369e+06	8	8	8	8	0.367984	0.668604	0.455881	0.139432
Q91YM2	Arhgap35	Rho GTPase-activating protein 35	945	NIIEATHMYDNVAEACSTTEEVFNSPR	monophos-(945)NIIEATHMYDNVAEACSTTEEVFNSPR			588669														1	0	1	0	#DIV/0!	#DIV/0!	#DIV/0!	#DIV/0!
Q91YM2	Arhgap35	Rho GTPase-activating protein 35	972	AGSPLCNSNLQDSEEDVEPPSYHLFR	diphos-(972)AGSPLCNSNLQDSEEDVEPPSYHLFR	83732.4	487073	753913			86142.4			226986	313470	297394		285554	404949			4	5	6	3	0.00882384	0.794807	0.70849	0.5254
Q91YM2	Arhgap35	Rho GTPase-activating protein 35	972	AGSPLCNSNLQDSEEDVEPPSYHLFR	monophos-(972)AGSPLCNSNLQDSEEDVEPPSYHLFR	64957.9	227322	433707						179488	294849			163917	77673.1			3	4	5	2	0.264104	0.570062	0.641827	0.307388
Q91YM2	Arhgap35	Rho GTPase-activating protein 35	1098	NEEENIYSVPHDSTQGK	monophos-(1098)NEEENIYSVPHDSTQGK			2.64583e+06		287960					805941	1.53585e+06		171721				2	3	3	2	0.2692	0.579443	0.125219	0.130159
Q91YM2	Arhgap35	Rho GTPase-activating protein 35	1172	TSFSVGSDDELGPIR	diphos-(1172)TSFSVGSDDELGPIR		137778	687533		279259					205152							3	1	3	1	#DIV/0!	#DIV/0!	#DIV/0!	#DIV/0!
Q91YM2	Arhgap35	Rho GTPase-activating protein 35	1172	TSFSVGSDDELGPIR	monophos-(1172)TSFSVGSDDELGPIR	226890	551812	844298	1.01211e+06	710765	305497	953651	1.50854e+06	527120	756935	493187	1.05356e+06	613084	797625	803231	1.08703e+06	8	8	8	8	0.119487	0.98927	0.572061	0.323278
P59281	Arhgap39	Rho GTPase-activating protein 39	377	FLSLEYSPVGK	monophos-(377)FLSLEYSPVGK		42356.1		140957			159320								135979		3	1	2	2	#DIV/0!	#DIV/0!	0.295954	0.384237
P59281	Arhgap39	Rho GTPase-activating protein 39	594	AFSEDEALAQQDSK	monophos-(594)AFSEDEALAQQDSK	345586	528132	1.37212e+06	718293	485826	273218		866621			952577		213487	418149	648603	1.19466e+06	7	5	5	7	0.866984	0.897192	0.728983	0.382516
P59281	Arhgap39	Rho GTPase-activating protein 39	679	KPSSETDIENWASK	monophos-(679)KPSSETDIENWASK								450411							691147		1	1	0	2	#DIV/0!	#DIV/0!	#DIV/0!	#DIV/0!
Q5SSM3	Arhgap44	Rho GTPase-activating protein 44	604	GSPGSIQGTPCPGTQLGPQPAASPSQLPADQSPHTLR	monophos-(604)GSPGSIQGTPCPGTQLGPQPAASPSQLPADQSPHTLR	120155		228756			88357.7											3	0	2	1	#DIV/0!	#DIV/0!	#DIV/0!	#DIV/0!
P97393	Arhgap5	Rho GTPase-activating protein 5	1190	HRGSEEDPLLSPVETWK	diphos-(1190)HRGSEEDPLLSPVETWK			403079										221553				1	1	1	1	#DIV/0!	#DIV/0!	#DIV/0!	#DIV/0!
P97393	Arhgap5	Rho GTPase-activating protein 5	1207	GGIDNPAITSDQEVDDKK	monophos-(1207)GGIDNPAITSDQEVDDKK					138618												1	0	0	1	#DIV/0!	#DIV/0!	#DIV/0!	#DIV/0!
Q99PT1	Arhgdia	Rho GDP-dissociation inhibitor 1	33	SIQEIQELDKDDESLR	monophos-(33)SIQEIQELDKDDESLR	540392	835679	1.24824e+06	1.35247e+06	1.10902e+06	490528	4.0352e+06	1.56736e+06	726451	548426	1.93973e+06	2.28925e+06	300166	445320	1.41029e+06	2.44529e+06	8	8	8	8	0.508141	0.794312	0.104601	0.571076
Q8R4H2	Arhgef12	Rho guanine nucleotide exchange factor 12	291	TDWSSGDASRPSSDSADSPK	monophos-(291)TDWSSGDASRPSSDSADSPK	162346								244930								1	1	2	0	#DIV/0!	#DIV/0!	#DIV/0!	#DIV/0!
Q8R4H2	Arhgef12	Rho guanine nucleotide exchange factor 12	326	SEGVQDAEPQSLVGSPSTR	monophos-(326)SEGVQDAEPQSLVGSPSTR	120875								191375	281527							1	2	3	0	#DIV/0!	#DIV/0!	#DIV/0!	#DIV/0!
Q60875	Arhgef2	Rho guanine nucleotide exchange factor 2	148	SVSTTNIAGHFNDESPLGLR	monophos-(148)SVSTTNIAGHFNDESPLGLR								33413.5									1	0	0	1	#DIV/0!	#DIV/0!	#DIV/0!	#DIV/0!
Q60875	Arhgef2	Rho guanine nucleotide exchange factor 2	168	QILSQSTDSLNMR	monophos-(168)QILSQSTDSLNMR						77374											1	0	0	1	#DIV/0!	#DIV/0!	#DIV/0!	#DIV/0!
Q60875	Arhgef2	Rho guanine nucleotide exchange factor 2	643	LESFESLR	monophos-(643)LESFESLR									121360		174066						0	2	2	0	#DIV/0!	#DIV/0!	#DIV/0!	#DIV/0!
Q60875	Arhgef2	Rho guanine nucleotide exchange factor 2	682	EPALPLDSDSGSCPGVTANGEAR	monophos-(682)EPALPLDSDSGSCPGVTANGEAR								80375.9									1	0	0	1	#DIV/0!	#DIV/0!	#DIV/0!	#DIV/0!
Q60875	Arhgef2	Rho guanine nucleotide exchange factor 2	884	SLPAGDALYLSFNPPQPSR	monophos-(884)SLPAGDALYLSFNPPQPSR	147934	343642	2.08651e+06	1.79388e+06		988841	2.56318e+06	1.05626e+06	872693	1.25035e+06	1.96648e+06	1.67796e+06	293226	610649	933066	3.47579e+06	7	8	8	7	0.802503	0.83995	0.27338	0.766779
Q60875	Arhgef2	Rho guanine nucleotide exchange factor 2	915	SLHRPFDDREAQELGSPEDR	monophos-(915)SLHRPFDDREAQELGSPEDR		398199	1.10751e+06	1.01994e+06	783036		1.51719e+06	357993	550175	576798	715802	845506			575319	1.12799e+06	6	6	7	5	0.159113	0.530902	0.20685	0.551294
Q60875	Arhgef2	Rho guanine nucleotide exchange factor 2	935	LQDSSDPDTGSEEEVSSRLSPPHSPR	diphos-(935)LQDSSDPDTGSEEEVSSRLSPPHSPR	641728	1.3135e+06	2.2454e+06	273516	6.20168e+06	95659.3	382052	236252	5.27713e+06	4.21066e+06	2.24909e+06	356579	1.74349e+06	376967	117530		8	7	8	7	0.983364	0.565674	0.621464	0.480534
Q8K4I3	Arhgef6	Rho guanine nucleotide exchange factor 6	485	MSGFMYQGK	monophos-(485)MSGFMYQGK			339124			71064.4	324363	453344								326687	4	1	1	4	#DIV/0!	#DIV/0!	#DIV/0!	#DIV/0!
Q9ES28	Arhgef7	Rho guanine nucleotide exchange factor 7	129	IKSFDSLGSQSSHSR	diphos-(129)IKSFDSLGSQSSHSR						159435							105463				1	1	0	2	#DIV/0!	#DIV/0!	#DIV/0!	#DIV/0!
Q9ES28	Arhgef7	Rho guanine nucleotide exchange factor 7	129	IKSFDSLGSQSSHSR	monophos-(129)IKSFDSLGSQSSHSR											1.70166e+06		110924				0	2	1	1	#DIV/0!	#DIV/0!	#DIV/0!	#DIV/0!
Q9ES28	Arhgef7	Rho guanine nucleotide exchange factor 7	154	SLDMTDNTNSQLVVR	monophos-(154)SLDMTDNTNSQLVVR	16399.2	282721	144962	1.07712e+06	238412	380872	558250	429351	276259	187207	296110	616753	445111	185929	656926	524579	8	8	8	8	0.174051	0.9551	0.0652862	0.627303
Q9ES28	Arhgef7	Rho guanine nucleotide exchange factor 7	218	EIKPSEKPVSPK	monophos-(218)EIKPSEKPVSPK	2.85303e+06	3.72214e+06	624599	2.84807e+06	1.77125e+06	2.41718e+06	1.48817e+06	837286	4.85926e+06	5.31774e+06	6.10966e+06	975134	1.54247e+06	1.45404e+06	3.10165e+06	7.25844e+06	8	8	8	8	0.0523298	0.0782151	0.931835	0.371391
Q9ES28	Arhgef7	Rho guanine nucleotide exchange factor 7	337	TLYLAYCANHPSAVSVLTEHSEDLGEFMETKGASSPGILVLTTGLSKPFMR	diphos-(337)TLYLAYCANHPSAVSVLTEHSEDLGEFMETKGASSPGILVLTTGLSKPFMR																557025	0	1	0	1	#DIV/0!	#DIV/0!	#DIV/0!	#DIV/0!
Q9ES28	Arhgef7	Rho guanine nucleotide exchange factor 7	495	MSGFIYQGK	monophos-(495)MSGFIYQGK	2.38075e+06	2.88948e+06	4.31011e+06	4.25532e+06	2.38468e+06	1.81041e+06	6.85945e+06	4.76253e+06	3.89103e+06	4.38009e+06	4.48779e+06	5.67818e+06	1.79902e+06	1.38774e+06	4.48575e+06	6.91562e+06	8	8	8	8	0.811978	0.637786	0.0492966	0.796586
Q9ES28	Arhgef7	Rho guanine nucleotide exchange factor 7	670	KPSDEEFAVRK	monophos-(670)KPSDEEFAVRK	3.05634e+06	4.8771e+06	4.63771e+06	3.92104e+06	2.36515e+06	1.65419e+06	7.57216e+06	5.75996e+06	4.04028e+06	5.32604e+06	6.04226e+06	5.27687e+06	1.99123e+06	1.12038e+06	6.98956e+06	6.91897e+06	8	8	8	8	0.741139	0.645263	0.0115778	0.741568
Q9ES28	Arhgef7	Rho guanine nucleotide exchange factor 7	743	LEPSDLSEDSEYDSIWTAHSYR	monophos-(743)LEPSDLSEDSEYDSIWTAHSYR						120035											1	0	0	1	#DIV/0!	#DIV/0!	#DIV/0!	#DIV/0!
A2BH40	Arid1a	AT-rich interactive domain-containing protein 1A	694	GPSPSPVGSPASVAQSR	monophos-(694)GPSPSPVGSPASVAQSR	138902																1	0	1	0	#DIV/0!	#DIV/0!	#DIV/0!	#DIV/0!
A2BH40	Arid1a	AT-rich interactive domain-containing protein 1A	1126	SQPKIQPPSPAGSGSMQGPQTPQSTSSSMAEGGDLKPPTPASTPHSQIPPLPGMSR	diphos-(1126)SQPKIQPPSPAGSGSMQGPQTPQSTSSSMAEGGDLKPPTPASTPHSQIPPLPGMSR	249735																1	0	1	0	#DIV/0!	#DIV/0!	#DIV/0!	#DIV/0!
Q9JM93	Arl6ip4	ADP-ribosylation factor-like protein 6-interacting protein 4	139	SAGEDNDGPVLTDEQK	monophos-(139)SAGEDNDGPVLTDEQK			306021														1	0	1	0	#DIV/0!	#DIV/0!	#DIV/0!	#DIV/0!
Q9D7A8	Armc1	Armadillo repeat-containing protein 1	213	SESGEEMLVPFQDAPVEVEENTELPDYLPEDESPTKEQDK	diphos-(213)SESGEEMLVPFQDAPVEVEENTELPDYLPEDESPTKEQDK					179638				39686.3		363262			47915.4		142447	1	4	2	3	#DIV/0!	#DIV/0!	0.155867	0.592273
Q9D7A8	Armc1	Armadillo repeat-containing protein 1	213	SESGEEMLVPFQDAPVEVEENTELPDYLPEDESPTKEQDK	monophos-(213)SESGEEMLVPFQDAPVEVEENTELPDYLPEDESPTKEQDK	271231		3.71383e+06	412901	650591	102637		459631	224756		2.54664e+06	1.44303e+06	101100		646625	985690	6	6	6	6	0.384597	0.935057	0.00723623	0.171772
Q9D0L7	Armc10	Armadillo repeat-containing protein 10	42	SAEDLTDGSYDDILNAEQLKK	monophos-(42)SAEDLTDGSYDDILNAEQLKK	2.35688e+06	1.93941e+06	9.63497e+06	5.57956e+06	7.76084e+06	2.5196e+06	1.27601e+07	1.20231e+07	5.21331e+06	984140	1.78582e+07	1.08525e+07	1.05615e+06	1.54764e+06	8.61224e+06	1.89323e+07	8	8	8	8	0.204426	0.669823	0.798337	0.660568
Q8BHS6	Armcx3	Armadillo repeat-containing X-linked protein 3	56	YNDWSDDDDDSNESK	monophos-(56)YNDWSDDDDDSNESK			875939								932814			139596			1	2	2	1	#DIV/0!	#DIV/0!	#DIV/0!	#DIV/0!
P53762	Arnt	Aryl hydrocarbon receptor nuclear translocator	465	NSSQEPRPTLSNTIPRSQLGPTANLSLEMGTGQLPSR	diphos-(465)NSSQEPRPTLSNTIPRSQLGPTANLSLEMGTGQLPSR								307435									1	0	0	1	#DIV/0!	#DIV/0!	#DIV/0!	#DIV/0!
Q9D898	Arpc5l	Actin-related protein 2/3 complex subunit 5-like protein	55	AFHAALRNSPINTK	monophos-(55)AFHAALRNSPINTK	745673	823771					8.9264e+06		1.2685e+06		3.90704e+06	5.11212e+06			3.6729e+06		3	4	5	2	0.115709	0.997387	0.275908	0.113042
Q9D898	Arpc5l	Actin-related protein 2/3 complex subunit 5-like protein	89	SSEIEQAVQSLDR	monophos-(89)SSEIEQAVQSLDR							252519										1	0	0	1	#DIV/0!	#DIV/0!	#DIV/0!	#DIV/0!
Q9DCB4	Arpp21	cAMP-regulated phosphoprotein 21	29	SESLDEEEKLELQR	monophos-(29)SESLDEEEKLELQR	887524	1.22246e+06	200054	1.07261e+06	295395	468647	657947		778310	441412	1.42496e+06	1.07565e+06			1.27944e+06		7	5	8	4	0.929152	0.202299	0.809621	0.420499
Q9DCB4	Arpp21	cAMP-regulated phosphoprotein 21	378	TASFGGITVLTR	monophos-(378)TASFGGITVLTR	84920.3	101024	295514			109004	574580		100112	75035.5	299934		138171	79887.3	421720		5	6	6	5	0.422247	0.667368	0.14657	0.326892
Q8BWG8	Arrb1	Beta-arrestin-1	363	EVPESETPVDTNLIELDTNDDDIVFEDFAR	monophos-(363)EVPESETPVDTNLIELDTNDDDIVFEDFAR			200807					45565.1					89233.5				2	1	1	2	#DIV/0!	#DIV/0!	#DIV/0!	#DIV/0!
Q8BWG8	Arrb1	Beta-arrestin-1	400	DDKDEEDDGTGSPHLNNR	monophos-(400)DDKDEEDDGTGSPHLNNR			465257														1	0	1	0	#DIV/0!	#DIV/0!	#DIV/0!	#DIV/0!
P98203	Arvcf	Armadillo repeat protein deleted in velo-cardio-facial syndrome homolog	0	MEDCNVHSAASILASVKEQEAR	monophos-(0)MEDCNVHSAASILASVKEQEAR		125937															1	0	1	0	#DIV/0!	#DIV/0!	#DIV/0!	#DIV/0!
P98203	Arvcf	Armadillo repeat protein deleted in velo-cardio-facial syndrome homolog	268	SLAADDEGGPDLEPDYSTATR	monophos-(268)SLAADDEGGPDLEPDYSTATR		156214						207354						40807.6	211047		2	2	1	3	0.371557	0.593898	#DIV/0!	#DIV/0!
P98203	Arvcf	Armadillo repeat protein deleted in velo-cardio-facial syndrome homolog	301	AFEDTADDAGELIEERPPFPAATAPLAQPERGSLGSLDR	diphos-(301)AFEDTADDAGELIEERPPFPAATAPLAQPERGSLGSLDR	64771.6		543203					448987								502581	3	1	2	2	#DIV/0!	#DIV/0!	0.142034	0.549459
P98203	Arvcf	Armadillo repeat protein deleted in velo-cardio-facial syndrome homolog	639	NFDTLDLPK	monophos-(639)NFDTLDLPK	104369	82033.3	214318				320107	263561	166891	144148					251019		5	3	5	3	0.493133	0.888865	0.718673	0.00787779
Q9QWY8	Asap1	Arf-GAP with SH3 domain, ANK repeat and PH domain-containing protein 1	523	NVGNNSFNDIMEANLPSPSPKPTPSSDMTVR	monophos-(523)NVGNNSFNDIMEANLPSPSPKPTPSSDMTVR			267079								454266						1	1	2	0	#DIV/0!	#DIV/0!	#DIV/0!	#DIV/0!
Q9QWY8	Asap1	Arf-GAP with SH3 domain, ANK repeat and PH domain-containing protein 1	725	QDEMDESDDDLDDKPSPIKK	diphos-(725)QDEMDESDDDLDDKPSPIKK		720953	1.53089e+06	835516		461198	971337	892024	995897	1.02106e+06	1.59823e+06			578682		1.1367e+06	6	5	6	5	0.929736	0.470408	0.633228	0.155806
Q9QWY8	Asap1	Arf-GAP with SH3 domain, ANK repeat and PH domain-containing protein 1	725	QDEMDESDDDLDDKPSPIKK	monophos-(725)QDEMDESDDDLDDKPSPIKK	2.56427e+06	2.47609e+06	3.76888e+06	1.35383e+06	674930	560113	2.34262e+06	1.90643e+06	5.16492e+06	3.77518e+06	6.27951e+06	1.05817e+06	289013	953986	1.16549e+06	4.86535e+06	8	8	8	8	0.0568773	0.295052	0.625942	0.0579205
Q9QWY8	Asap1	Arf-GAP with SH3 domain, ANK repeat and PH domain-containing protein 1	851	TLSDPPSPLPHGPPNK	monophos-(851)TLSDPPSPLPHGPPNK	974394	1.25746e+06	625864	256568		339006	1.00492e+06	700808	1.13892e+06	1.95799e+06	1.22257e+06	618824	185155	341573	1.02632e+06	1.41193e+06	7	8	8	7	0.271741	0.346369	0.751308	0.271892
Q9QWY8	Asap1	Arf-GAP with SH3 domain, ANK repeat and PH domain-containing protein 1	1056	QASEDSNDLTPTLPETPVPLPR	diphos-(1056)QASEDSNDLTPTLPETPVPLPR	317013	323577	960889	569820	202240	511611	723188	851898	84490.6	719381	1.64537e+06		359091	551781	557283	380302	8	7	7	8	0.139955	0.785395	0.0281638	0.517169
Q9QWY8	Asap1	Arf-GAP with SH3 domain, ANK repeat and PH domain-containing protein 1	1056	QASEDSNDLTPTLPETPVPLPR	monophos-(1056)QASEDSNDLTPTLPETPVPLPR	1.66307e+06	630767	4.04932e+06	1.94373e+06	5.61658e+06	671086	2.98956e+06	1.21303e+06	1.0919e+06	1.53356e+06	3.3817e+06	1.41222e+06	901471	598630	1.30292e+06	1.66381e+06	8	8	8	8	0.0701087	0.232047	0.343187	0.899264
Q9QWY8	Asap1	Arf-GAP with SH3 domain, ANK repeat and PH domain-containing protein 1	1134	GVFPVSFVHILSD	monophos-(1134)GVFPVSFVHILSD	22816.9		242458	329103		71987.3	340162	198480	51705.1	32731.8	289594	416322	87638.9	41281	142497	229502	6	8	7	7	0.93186	0.600266	0.325116	0.600222
Q7SIG6	Asap2	Arf-GAP with SH3 domain, ANK repeat and PH domain-containing protein 2	695	LLHEDLDESDDDVDEKLQPSPNR	monophos-(695)LLHEDLDESDDDVDEKLQPSPNR		1.61617e+06	2.86748e+06	2.09723e+06	443557	695964	3.08517e+06	1.70658e+06	3.79783e+06	2.78804e+06	3.84998e+06	2.76753e+06	764499	818696	1.62671e+06	3.29633e+06	7	8	7	8	0.604039	0.271995	0.477783	0.0264864
Q8BSY0	Asph	Aspartyl/asparaginyl beta-hydroxylase	8	GGGGNSSSSGSGSGSGSGSPSTGSSGSSSSPGAR	monophos-(8)GGGGNSSSSGSGSGSGSGSPSTGSSGSSSSPGAR	29811.4	42031.5	194887		55011.4					54617.8	362460			47380.9		17453.4	4	4	5	3	0.252717	0.671088	0.0381388	0.2056
Q8VBT9	Aspscr1	Tether containing UBX domain for GLUT4	187	SKAPGSPVSSLSADQASSSTLLPLNSGEFSR	monophos-(187)SKAPGSPVSSLSADQASSSTLLPLNSGEFSR											197671						0	1	1	0	#DIV/0!	#DIV/0!	#DIV/0!	#DIV/0!
Q61137	Astn1	Astrotactin-1	191	SASAEAANEIHYIPSVLIGGHGRESLR	diphos-(191)SASAEAANEIHYIPSVLIGGHGRESLR					88641												1	0	0	1	#DIV/0!	#DIV/0!	#DIV/0!	#DIV/0!
Q61137	Astn1	Astrotactin-1	191	SASAEAANEIHYIPSVLIGGHGR	monophos-(191)SASAEAANEIHYIPSVLIGGHGR			216629		517241		405676				439056	517726	175441		754725	384475	3	5	3	5	0.741659	0.61625	0.764865	0.70566
Q61137	Astn1	Astrotactin-1	221	VQGHNSSGTLSIR	monophos-(221)VQGHNSSGTLSIR	55456.6																1	0	1	0	#DIV/0!	#DIV/0!	#DIV/0!	#DIV/0!
Q61137	Astn1	Astrotactin-1	281	SGMDLTPGSDNAK	monophos-(281)SGMDLTPGSDNAK	93385.6																1	0	1	0	#DIV/0!	#DIV/0!	#DIV/0!	#DIV/0!
Q61137	Astn1	Astrotactin-1	337	AGSAFLNPEGDSSTEAENDPQLTFYTDPSR	diphos-(337)AGSAFLNPEGDSSTEAENDPQLTFYTDPSR											131532						0	1	1	0	#DIV/0!	#DIV/0!	#DIV/0!	#DIV/0!
Q61137	Astn1	Astrotactin-1	337	AGSAFLNPEGDSSTEAENDPQLTFYTDPSR	monophos-(337)AGSAFLNPEGDSSTEAENDPQLTFYTDPSR	1.00902e+06	577824	269912			84251.3		163230	950338	965623	232014			126464		199320	5	5	6	4	0.828996	0.778807	0.00803597	0.0151976
Q61137	Astn1	Astrotactin-1	373	VGSPRSPVNK	diphos-(373)VGSPRSPVNK														128370			0	1	0	1	#DIV/0!	#DIV/0!	#DIV/0!	#DIV/0!
Q8K341	Atat1	Alpha-tubulin N-acetyltransferase 1	258	RATPPAHPPPR	monophos-(258)RATPPAHPPPR								1.09679e+06			156559						1	1	1	1	#DIV/0!	#DIV/0!	#DIV/0!	#DIV/0!
Q8K341	Atat1	Alpha-tubulin N-acetyltransferase 1	269	SSSLGNSPDRGPLRPFVPEQELLR	diphos-(269)SSSLGNSPDRGPLRPFVPEQELLR					1.02365e+06			760938								848713	2	1	0	3	#DIV/0!	#DIV/0!	#DIV/0!	#DIV/0!
Q8BHE3	Atcay	Caytaxin	36	LGGAVEDSSSPPSTLNLSGAHR	monophos-(36)LGGAVEDSSSPPSTLNLSGAHR	2.12949e+06	4.89102e+06	6.69965e+06	1.28297e+06	2.50636e+06	1.08423e+06	4.39242e+06	1.60448e+06	5.91293e+06	4.71492e+06	6.11904e+06	2.83364e+06	2.731e+06	2.17593e+06	1.2826e+06		8	7	8	7	0.890657	0.561088	0.180711	0.0314495
Q8BHE3	Atcay	Caytaxin	346	SEEKPETVEEEDRAAEATEDQETSMS	monophos-(346)SEEKPETVEEEDRAAEATEDQETSMS			327553		132234						178759						2	1	2	1	#DIV/0!	#DIV/0!	#DIV/0!	#DIV/0!
Q8C0J2	Atg16l1	Autophagy-related protein 16-1	286	SVSSIPVPQDIMDTHPASGK	monophos-(286)SVSSIPVPQDIMDTHPASGK							339333										1	0	0	1	#DIV/0!	#DIV/0!	#DIV/0!	#DIV/0!
Q8BGE6	Atg4b	Cysteine protease ATG4B	379	FFDSEDEDFEILSL	diphos-(379)FFDSEDEDFEILSL											53006.1					64447.5	0	2	1	1	#DIV/0!	#DIV/0!	#DIV/0!	#DIV/0!
Q8BGE6	Atg4b	Cysteine protease ATG4B	379	FFDSEDEDFEILSL	monophos-(379)FFDSEDEDFEILSL		56602.6	1.09557e+06	197268		253714		458382			1.58158e+06	565620	298615	273439		925921	5	5	5	5	0.591212	0.328385	0.144716	0.432337
Q811C2	Atg4c	Cysteine protease ATG4C	358	DFPLETFHCPSPK	monophos-(358)DFPLETFHCPSPK		121910							151429								1	1	2	0	#DIV/0!	#DIV/0!	#DIV/0!	#DIV/0!
Q811C2	Atg4c	Cysteine protease ATG4C	424	DFDFTSTAASEEDLFSEDERK	monophos-(424)DFDFTSTAASEEDLFSEDERK	38572.3	58665.7	273389						77901.4		200756						3	2	5	0	0.853598	0.892339	#DIV/0!	#DIV/0!
Q811C2	Atg4c	Cysteine protease ATG4C	448	RFSTEEFVLL	monophos-(448)RFSTEEFVLL											62280						0	1	1	0	#DIV/0!	#DIV/0!	#DIV/0!	#DIV/0!
Q8BH66	Atl1	Atlastin-1	6	DRNSWGGFSEK	monophos-(6)DRNSWGGFSEK	131447	9.11471e+06	1.14269e+06		661305				224876	7.26572e+06	803246	2.17374e+06	302552	141768		836886	4	7	7	4	0.267545	0.604747	0.00203088	0.122415
Q8BH66	Atl1	Atlastin-1	8	NSWGGFSEK	monophos-(8)NSWGGFSEK			295564						116683		280103			73664.8			1	3	3	1	#DIV/0!	#DIV/0!	#DIV/0!	#DIV/0!
Q8BH66	Atl1	Atlastin-1	17	SSDWSSEEEEPVRK	diphos-(17)SSDWSSEEEEPVRK	654677	3.28963e+06	1.26171e+07	3.05631e+06	2.22245e+06			5.56873e+06	1.78812e+06	390093	1.10712e+07	2.47141e+06		1.11071e+06		5.18291e+06	6	6	8	4	0.8886	0.71346	0.236181	0.730145
Q8BH66	Atl1	Atlastin-1	17	SSDWSSEEEEPVRK	monophos-(17)SSDWSSEEEEPVRK		5.0508e+06	4.87402e+06		1.66521e+06		978117		853728	185063	1.32339e+06		725184				4	4	5	3	0.0334731	0.109204	0.0848874	0.37737
Q9Z1W8	Atp12a	Potassium-transporting ATPase alpha chain 2	487	VAEIPFNSTNK	monophos-(487)VAEIPFNSTNK	217553	449188	518061						445230	633154	386080						3	3	6	0	0.803492	0.472011	#DIV/0!	#DIV/0!
Q8VDN2	Atp1a1	Sodium/potassium-transporting ATPase subunit alpha-1	212	VDNSSLTGESEPQTR	monophos-(212)VDNSSLTGESEPQTR	1.62351e+06	4.51651e+06	3.86584e+06	1.18995e+06	2.96922e+06	960096	4.1831e+06		4.90954e+06	8.59914e+06	4.66276e+06	1.99247e+06	1.68991e+06	948398	1.76916e+06	1.4684e+06	7	8	8	7	0.19182	0.666106	0.103457	0.0768945
Q8VDN2	Atp1a1	Sodium/potassium-transporting ATPase subunit alpha-1	227	SPDFTNENPLETR	monophos-(227)SPDFTNENPLETR	2.59165e+06	4.22148e+06		4.30101e+06	2.70331e+06	1.54716e+06	6.70428e+06	1.42032e+06	5.5345e+06	8.45978e+06	5.17209e+06	4.6328e+06	3.6994e+06	2.16294e+06	3.98434e+06	4.97907e+06	7	8	7	8	0.925663	0.145289	0.987488	0.113693
Q8VDN2	Atp1a1	Sodium/potassium-transporting ATPase subunit alpha-1	359	NLEAVETLGSTSTICSDKTGTLTQNR	monophos-(359)NLEAVETLGSTSTICSDKTGTLTQNR										171413							0	1	1	0	#DIV/0!	#DIV/0!	#DIV/0!	#DIV/0!
Q8VDN2	Atp1a1	Sodium/potassium-transporting ATPase subunit alpha-1	445	AVAGDASESALLKCIEVCCGSVMEMR	monophos-(445)AVAGDASESALLKCIEVCCGSVMEMR												307534					0	1	1	0	#DIV/0!	#DIV/0!	#DIV/0!	#DIV/0!
Q8VDN2	Atp1a1	Sodium/potassium-transporting ATPase subunit alpha-1	476	IVEIPFNSTNK	monophos-(476)IVEIPFNSTNK		146121	289109				422243				177377		94614.6				3	2	3	2	0.574112	0.257511	0.182258	0.713524
Q8VDN2	Atp1a1	Sodium/potassium-transporting ATPase subunit alpha-1	629	GVGIISEGNETVEDIAAR	monophos-(629)GVGIISEGNETVEDIAAR		90259.1							113507	865898			97195.4				1	3	3	1	#DIV/0!	#DIV/0!	#DIV/0!	#DIV/0!
Q8VDN2	Atp1a1	Sodium/potassium-transporting ATPase subunit alpha-1	707	QGAIVAVTGDGVNDSPALKK	monophos-(707)QGAIVAVTGDGVNDSPALKK	269219	749729	251025						660489	1.43691e+06	251141						3	3	6	0	0.361341	0.402321	#DIV/0!	#DIV/0!
Q6PIE5	Atp1a2	Sodium/potassium-transporting ATPase subunit alpha-2	210	VDNSSLTGESEPQTR	monophos-(210)VDNSSLTGESEPQTR	1.62351e+06	4.51651e+06	3.86584e+06	1.18995e+06	2.96922e+06	960096	4.1831e+06		4.90954e+06	8.59914e+06	4.66276e+06	1.99247e+06	1.68991e+06	948398	1.76916e+06	1.4684e+06	7	8	8	7	0.19182	0.666106	0.103457	0.0768945
Q6PIE5	Atp1a2	Sodium/potassium-transporting ATPase subunit alpha-2	357	NLEAVETLGSTSTICSDKTGTLTQNR	monophos-(357)NLEAVETLGSTSTICSDKTGTLTQNR										171413							0	1	1	0	#DIV/0!	#DIV/0!	#DIV/0!	#DIV/0!
Q6PIE5	Atp1a2	Sodium/potassium-transporting ATPase subunit alpha-2	432	AGQENISVSKR	monophos-(432)AGQENISVSKR	111161	270923	206982	248654		72333.5			210375	350099	257217	278729		90261.1			5	5	8	2	0.840724	0.367804	0.280435	0.0140232
Q6PIE5	Atp1a2	Sodium/potassium-transporting ATPase subunit alpha-2	456	CIELSCGSVR	monophos-(456)CIELSCGSVR			783163		122915												2	0	1	1	#DIV/0!	#DIV/0!	#DIV/0!	#DIV/0!
Q6PIE5	Atp1a2	Sodium/potassium-transporting ATPase subunit alpha-2	474	VAEIPFNSTNK	monophos-(474)VAEIPFNSTNK	217553	449188	518061						445230	633154	386080						3	3	6	0	0.803492	0.472011	#DIV/0!	#DIV/0!
Q6PIE5	Atp1a2	Sodium/potassium-transporting ATPase subunit alpha-2	626	GVGIISEGNETVEDIAAR	monophos-(626)GVGIISEGNETVEDIAAR		90259.1							113507	865898			97195.4				1	3	3	1	#DIV/0!	#DIV/0!	#DIV/0!	#DIV/0!
Q6PIE5	Atp1a2	Sodium/potassium-transporting ATPase subunit alpha-2	644	LNIPVSQVNPR	monophos-(644)LNIPVSQVNPR													67092.7				0	1	0	1	#DIV/0!	#DIV/0!	#DIV/0!	#DIV/0!
Q6PIE5	Atp1a2	Sodium/potassium-transporting ATPase subunit alpha-2	704	QGAIVAVTGDGVNDSPALKK	monophos-(704)QGAIVAVTGDGVNDSPALKK	269219	749729	251025						660489	1.43691e+06	251141						3	3	6	0	0.361341	0.402321	#DIV/0!	#DIV/0!
Q6PIC6	Atp1a3	Sodium/potassium-transporting ATPase subunit alpha-3	202	VDNSSLTGESEPQTR	monophos-(202)VDNSSLTGESEPQTR	1.62351e+06	4.51651e+06	3.86584e+06	1.18995e+06	2.96922e+06	960096	4.1831e+06		4.90954e+06	8.59914e+06	4.66276e+06	1.99247e+06	1.68991e+06	948398	1.76916e+06	1.4684e+06	7	8	8	7	0.19182	0.666106	0.103457	0.0768945
Q6PIC6	Atp1a3	Sodium/potassium-transporting ATPase subunit alpha-3	217	SPDCTHDNPLETR	monophos-(217)SPDCTHDNPLETR	327461	1.89009e+06	1.06422e+06		1.04231e+06		581001		1.93087e+06	2.98151e+06	2.01342e+06		984366	610859			5	5	6	4	0.406296	0.18278	0.0544385	0.0945643
Q6PIC6	Atp1a3	Sodium/potassium-transporting ATPase subunit alpha-3	349	NLEAVETLGSTSTICSDKTGTLTQNR	monophos-(349)NLEAVETLGSTSTICSDKTGTLTQNR										171413							0	1	1	0	#DIV/0!	#DIV/0!	#DIV/0!	#DIV/0!
Q6PIC6	Atp1a3	Sodium/potassium-transporting ATPase subunit alpha-3	435	DVAGDASESALLK	monophos-(435)DVAGDASESALLK	113557	286062	418044	257045	554915				283575	534352	336341		230040	114827	262824		5	6	7	4	0.683098	0.734756	0.429299	0.778357
Q6PIC6	Atp1a3	Sodium/potassium-transporting ATPase subunit alpha-3	448	CIELSSGSVK	monophos-(448)CIELSSGSVK					163134												1	0	0	1	#DIV/0!	#DIV/0!	#DIV/0!	#DIV/0!
Q6PIC6	Atp1a3	Sodium/potassium-transporting ATPase subunit alpha-3	466	VAEIPFNSTNK	monophos-(466)VAEIPFNSTNK	217553	449188	518061						445230	633154	386080						3	3	6	0	0.803492	0.472011	#DIV/0!	#DIV/0!
Q6PIC6	Atp1a3	Sodium/potassium-transporting ATPase subunit alpha-3	619	GVGIISEGNETVEDIAAR	monophos-(619)GVGIISEGNETVEDIAAR		90259.1							113507	865898			97195.4				1	3	3	1	#DIV/0!	#DIV/0!	#DIV/0!	#DIV/0!
Q6PIC6	Atp1a3	Sodium/potassium-transporting ATPase subunit alpha-3	637	LNIPVSQVNPR	monophos-(637)LNIPVSQVNPR													67092.7				0	1	0	1	#DIV/0!	#DIV/0!	#DIV/0!	#DIV/0!
Q6PIC6	Atp1a3	Sodium/potassium-transporting ATPase subunit alpha-3	697	QGAIVAVTGDGVNDSPALKK	monophos-(697)QGAIVAVTGDGVNDSPALKK	269219	749729	251025						660489	1.43691e+06	251141						3	3	6	0	0.361341	0.402321	#DIV/0!	#DIV/0!
Q9WV27	Atp1a4	Sodium/potassium-transporting ATPase subunit alpha-4	369	NLEAVETLGSTSTICSDKTGTLTQNR	monophos-(369)NLEAVETLGSTSTICSDKTGTLTQNR										171413							0	1	1	0	#DIV/0!	#DIV/0!	#DIV/0!	#DIV/0!
Q9WV27	Atp1a4	Sodium/potassium-transporting ATPase subunit alpha-4	487	VAEIPFNSTNK	monophos-(487)VAEIPFNSTNK	217553	449188	518061						445230	633154	386080						3	3	6	0	0.803492	0.472011	#DIV/0!	#DIV/0!
Q8R429	Atp2a1	Sarcoplasmic/endoplasmic reticulum calcium ATPase 1	174	VDQSILTGESVSVIKHTDPVPDPR	diphos-(174)VDQSILTGESVSVIKHTDPVPDPR													1.29011e+06				0	1	0	1	#DIV/0!	#DIV/0!	#DIV/0!	#DIV/0!
O55143	Atp2a2	Sarcoplasmic/endoplasmic reticulum calcium ATPase 2	174	VDQSILTGESVSVIKHTDPVPDPR	diphos-(174)VDQSILTGESVSVIKHTDPVPDPR													1.29011e+06				0	1	0	1	#DIV/0!	#DIV/0!	#DIV/0!	#DIV/0!
O55143	Atp2a2	Sarcoplasmic/endoplasmic reticulum calcium ATPase 2	655	EFDELSPSAQR	monophos-(655)EFDELSPSAQR	370126	1.31175e+06	1.14604e+06	748814	629643		1.84626e+06		825908	1.36521e+06			266538	257564	455540		6	5	6	5	0.822078	0.253177	0.258818	0.418683
O55143	Atp2a2	Sarcoplasmic/endoplasmic reticulum calcium ATPase 2	712	SEIGIAMGSGTAVAKTASEMVLADDNFSTIVAAVEEGR	monophos-(712)SEIGIAMGSGTAVAKTASEMVLADDNFSTIVAAVEEGR		445839															1	0	1	0	#DIV/0!	#DIV/0!	#DIV/0!	#DIV/0!
Q9R0K7	Atp2b2	Plasma membrane calcium-transporting ATPase 2	15	NESSHGGEFGCTMEELR	monophos-(15)NESSHGGEFGCTMEELR	688613	1.43037e+06	1.38147e+06		991721	334579			1.54841e+06	1.50471e+06	356705		1.82767e+06	213599			5	5	6	4	0.380637	0.759114	0.417575	0.448746
Q9R0K7	Atp2b2	Plasma membrane calcium-transporting ATPase 2	1103	SSLYEGLEKPESR	monophos-(1103)SSLYEGLEKPESR		1.06793e+06						182617	263458	1.04986e+06			159272				2	3	3	2	0.654627	0.801843	0.0508075	0.166566
Q9R0K7	Atp2b2	Plasma membrane calcium-transporting ATPase 2	1116	TSIHNFMAHPEFR	monophos-(1116)TSIHNFMAHPEFR	942967	1.69389e+06	2.61912e+06	276841	1.68452e+06		757738	1.36532e+06	1.7991e+06	4.73235e+06	2.1934e+06	5.48079e+06	3.03482e+06			2.04523e+06	7	6	8	5	0.117351	0.0156144	0.166311	0.442267
Q9R0K7	Atp2b2	Plasma membrane calcium-transporting ATPase 2	1129	IEDSQPHIPLIDDTDLEEDAALK	diphos-(1129)IEDSQPHIPLIDDTDLEEDAALK		66503.9	1.98784e+06			221125		725408		2.43591e+06	2.11322e+06	1.46602e+06	2.9115e+06	898439		2.10462e+06	4	6	5	5	0.646784	0.0386831	0.752311	0.718173
Q9R0K7	Atp2b2	Plasma membrane calcium-transporting ATPase 2	1129	IEDSQPHIPLIDDTDLEEDAALK	monophos-(1129)IEDSQPHIPLIDDTDLEEDAALK	3.94276e+06	2.69236e+06	1.17803e+07	1.69904e+06	4.08652e+06	491184	2.56021e+06	1.55404e+06	5.05477e+06	2.61007e+06	5.68827e+06	4.3911e+06	6.50637e+06	1.04333e+06	251980	4.40849e+06	8	8	8	8	0.251298	0.923744	0.372334	0.141317
Q9R0K7	Atp2b2	Plasma membrane calcium-transporting ATPase 2	1152	QNSSPPSSLNKNNSAIDSGINLTTDTSK	diphos-(1152)QNSSPPSSLNKNNSAIDSGINLTTDTSK	41254.4	55896.3							520263					115122			2	2	3	1	0.0459954	0.410549	#DIV/0!	#DIV/0!
Q9R0K7	Atp2b2	Plasma membrane calcium-transporting ATPase 2	1152	QNSSPPSSLNK	monophos-(1152)QNSSPPSSLNK	992090	2.31454e+06	1.94993e+06	1.07191e+06	327045	203136	802651	228688	2.63742e+06	8.72657e+06	3.00643e+06	536804	233052	421139		801089	8	7	8	7	0.00234805	0.29076	1.90257e-05	0.0464138
Q9R0K7	Atp2b2	Plasma membrane calcium-transporting ATPase 2	1180	SATSSSPGSPIHSLETSL	diphos-(1180)SATSSSPGSPIHSLETSL	732934	4.85709e+06	6.81529e+06	3.18209e+06	3.65883e+06	1.73007e+06	6.2923e+06	409998	2.6076e+06	5.73734e+06	1.25411e+06	1.22809e+06	8.0451e+06	7.7093e+06	2.4703e+06		8	7	8	7	0.610321	0.627306	0.471096	0.466681
Q9R0K7	Atp2b2	Plasma membrane calcium-transporting ATPase 2	1180	SATSSSPGSPIHSLETSL	monophos-(1180)SATSSSPGSPIHSLETSL	1.22762e+06	2.2228e+06	5.44421e+06	2.22759e+06	3.07568e+06	767189	3.20942e+06	1.18246e+06	3.12413e+06	5.74079e+06	2.03432e+06	2.79587e+06	4.25441e+06	1.48208e+06	1.94331e+06	2.86954e+06	8	8	8	8	0.831268	0.413813	0.422786	0.309842
Q64436	Atp4a	Potassium-transporting ATPase alpha chain 1	221	VDNSSLTGESEPQTR	monophos-(221)VDNSSLTGESEPQTR	1.62351e+06	4.51651e+06	3.86584e+06	1.18995e+06	2.96922e+06	960096	4.1831e+06		4.90954e+06	8.59914e+06	4.66276e+06	1.99247e+06	1.68991e+06	948398	1.76916e+06	1.4684e+06	7	8	8	7	0.19182	0.666106	0.103457	0.0768945
Q64436	Atp4a	Potassium-transporting ATPase alpha chain 1	735	KADIGVAMGIAGSDAAK	monophos-(735)KADIGVAMGIAGSDAAK													503345				0	1	0	1	#DIV/0!	#DIV/0!	#DIV/0!	#DIV/0!
Q91VR2	Atp5c1	ATP synthase subunit gamma, mitochondrial	143	THSDQFLVSFK	monophos-(143)THSDQFLVSFK					69139												1	0	0	1	#DIV/0!	#DIV/0!	#DIV/0!	#DIV/0!
Q9DB20	Atp5o	ATP synthase subunit O, mitochondrial	136	GEVPCTVTTASPLDDAVLSELK	monophos-(136)GEVPCTVTTASPLDDAVLSELK											820360						0	1	1	0	#DIV/0!	#DIV/0!	#DIV/0!	#DIV/0!
P50518	Atp6v1e1	V-type proton ATPase subunit E 1	69	IQMSNLMNQAR	monophos-(69)IQMSNLMNQAR				507379	353673			2.24734e+06							368707	1.65871e+06	3	2	1	4	0.954428	0.982079	#DIV/0!	#DIV/0!
Q8BVE3	Atp6v1h	V-type proton ATPase subunit H	469	QLQSEQPQTAAARS	monophos-(469)QLQSEQPQTAAARS	49305.9	152684	183950		185060	27745			141241		181314	107760	104107	84215.8			5	5	6	4	0.213335	0.918974	0.588036	0.356924
P70704	Atp8a1	Probable phospholipid-transporting ATPase IA	20	TDDVSEKTSLADQEEVR	diphos-(20)TDDVSEKTSLADQEEVR		690465			388326					427326							2	1	2	1	#DIV/0!	#DIV/0!	#DIV/0!	#DIV/0!
Q811I0	Atpaf1	ATP synthase mitochondrial F1 complex assembly factor 1	49	RGSGLPPEGADGSGVSELEANPFYDR	monophos-(49)RGSGLPPEGADGSGVSELEANPFYDR		243704	1.78518e+06										491181				2	1	2	1	#DIV/0!	#DIV/0!	#DIV/0!	#DIV/0!
Q61687	Atrx	Transcriptional regulator ATRX	1204	IKPVTENLVLPSHTGFCQSSGDEALSK	diphos-(1204)IKPVTENLVLPSHTGFCQSSGDEALSK			444070														1	0	1	0	#DIV/0!	#DIV/0!	#DIV/0!	#DIV/0!
P54254	Atxn1	Ataxin-1	78	ALSAGLDYSPPSAPR	diphos-(78)ALSAGLDYSPPSAPR					281796										824549		1	1	0	2	#DIV/0!	#DIV/0!	#DIV/0!	#DIV/0!
Q7TQH0	Atxn2l	Ataxin-2-like protein	104	GPPQSPVFEGVYNNSR	monophos-(104)GPPQSPVFEGVYNNSR	222503				262430	290917			667814	1.06643e+06	905287			302730			3	4	4	3	0.021269	0.0627327	0.00634955	0.100676
Q7TQH0	Atxn2l	Ataxin-2-like protein	330	QGSGRESPSLVSR	diphos-(330)QGSGRESPSLVSR	286023	877441		326852		354357					515335					359212	4	2	4	2	0.562534	0.916703	0.0187036	0.362339
Q7TQH0	Atxn2l	Ataxin-2-like protein	330	QGSGRESPSLVSR	monophos-(330)QGSGRESPSLVSR					83331.6						248058						1	1	1	1	#DIV/0!	#DIV/0!	#DIV/0!	#DIV/0!
Q7TQH0	Atxn2l	Ataxin-2-like protein	582	EKEVDGLLTSDPMGSPVSSK	monophos-(582)EKEVDGLLTSDPMGSPVSSK	205864	208890	548878	502205		305714	405234	434370	599520	283089	356170	426086	316555	237526	418624	622109	7	8	8	7	0.956915	0.639659	0.636359	0.998814
Q80U56	Avl9	Late secretory pathway protein AVL9 homolog	242	KSMSEDAGPQESNPSADDFTSESTSDVLNTSLETVTR	monophos-(242)KSMSEDAGPQESNPSADDFTSESTSDVLNTSLETVTR		38473.2															1	0	1	0	#DIV/0!	#DIV/0!	#DIV/0!	#DIV/0!
Q80U56	Avl9	Late secretory pathway protein AVL9 homolog	361	DSLPSDSPPITVQPQANNR	monophos-(361)DSLPSDSPPITVQPQANNR			339230		268466												2	0	1	1	#DIV/0!	#DIV/0!	#DIV/0!	#DIV/0!
Q62036	Azi1	5-azacytidine-induced protein 1	970	ASLAQVVRQEFAEQLAASQEETQR	diphos-(970)ASLAQVVRQEFAEQLAASQEETQR			102082														1	0	1	0	#DIV/0!	#DIV/0!	#DIV/0!	#DIV/0!
Q3UI43	Babam1	BRISC and BRCA1-A complex member 1	41	ALGAQASVGSR	monophos-(41)ALGAQASVGSR	186700										203888						1	1	2	0	#DIV/0!	#DIV/0!	#DIV/0!	#DIV/0!
Q61337	Bad	Bcl2 antagonist of cell death	109	HSSYPAGTEEDEGMEEELSPFR	monophos-(109)HSSYPAGTEEDEGMEEELSPFR					1.62572e+06						806100						1	1	1	1	#DIV/0!	#DIV/0!	#DIV/0!	#DIV/0!
Q61337	Bad	Bcl2 antagonist of cell death	133	SRSAPPNLWAAQR	monophos-(133)SRSAPPNLWAAQR			172710	289615	79859.1		195452				402107	126708				179806	4	3	4	3	0.401206	0.577724	0.422698	0.279107
Q61337	Bad	Bcl2 antagonist of cell death	135	SAPPNLWAAQR	monophos-(135)SAPPNLWAAQR												313270				439347	0	2	1	1	#DIV/0!	#DIV/0!	#DIV/0!	#DIV/0!
Q61337	Bad	Bcl2 antagonist of cell death	152	RMSDEFEGSFK	monophos-(152)RMSDEFEGSFK			96838	351065	84797		537580				229130	133428					4	2	4	2	0.447093	0.63068	0.133662	0.54115
Q9Z1R2	Bag6	Large proline-rich protein BAG6	964	VGDPPQTLPEEPMEVQGAERTSPEPQR	monophos-(964)VGDPPQTLPEEPMEVQGAERTSPEPQR	440820	261288							353936					173741			2	2	3	1	0.997649	0.563691	#DIV/0!	#DIV/0!
Q9Z1R2	Bag6	Large proline-rich protein BAG6	984	TSPEPQRENASPAPGTTAEEAMSR	diphos-(984)TSPEPQRENASPAPGTTAEEAMSR	419083	466394	652929	338412	138507	200803	334974		591287	684539	662970			360284	360716	468549	7	6	7	6	0.739795	0.105864	0.796713	0.00763245
Q9Z1R2	Bag6	Large proline-rich protein BAG6	991	ENASPAPGTTAEEAMSR	monophos-(991)ENASPAPGTTAEEAMSR	215889								340666		341082			78205.8			1	3	3	1	#DIV/0!	#DIV/0!	#DIV/0!	#DIV/0!
Q3UHD1	Bai1	Brain-specific angiogenesis inhibitor 1	201	SSHPCGIMQTPCACLGGDVGDPASSPLVPR	diphos-(201)SSHPCGIMQTPCACLGGDVGDPASSPLVPR							444151										1	0	0	1	#DIV/0!	#DIV/0!	#DIV/0!	#DIV/0!
Q3UHD1	Bai1	Brain-specific angiogenesis inhibitor 1	1456	NENVATLSVSSLER	monophos-(1456)NENVATLSVSSLER	1.71369e+06	1.80361e+06			313425	795194	4.55663e+06		2.31378e+06				1.78747e+06	931001			5	3	3	5	0.316774	0.881616	0.0709355	0.802318
Q80ZF8	Bai3	Brain-specific angiogenesis inhibitor 3	1218	ISLNDDEEEKGTNPEGLSYSTLPGNVISK	monophos-(1218)ISLNDDEEEKGTNPEGLSYSTLPGNVISK													796246				0	1	0	1	#DIV/0!	#DIV/0!	#DIV/0!	#DIV/0!
Q80ZF8	Bai3	Brain-specific angiogenesis inhibitor 3	1400	SETGSTISMSSLER	diphos-(1400)SETGSTISMSSLER					217496												1	0	0	1	#DIV/0!	#DIV/0!	#DIV/0!	#DIV/0!
Q80ZF8	Bai3	Brain-specific angiogenesis inhibitor 3	1400	SETGSTISMSSLER	monophos-(1400)SETGSTISMSSLER													111701				0	1	0	1	#DIV/0!	#DIV/0!	#DIV/0!	#DIV/0!
Q8BKX1	Baiap2	Brain-specific angiogenesis inhibitor 1-associated protein 2	323	SLSPPQSQSK	monophos-(323)SLSPPQSQSK	1.1539e+06	1.91938e+06	3.41002e+06	1.07535e+06	541143	543755	2.42046e+06	1.06633e+06	1.7021e+06	648461	3.28468e+06	1.39169e+06		594784	1.86945e+06	2.31067e+06	8	7	8	7	0.903194	0.741701	0.667935	0.335297
Q8BKX1	Baiap2	Brain-specific angiogenesis inhibitor 1-associated protein 2	333	LSDSYSNTLPVR	monophos-(333)LSDSYSNTLPVR		346873															1	0	1	0	#DIV/0!	#DIV/0!	#DIV/0!	#DIV/0!
Q8BKX1	Baiap2	Brain-specific angiogenesis inhibitor 1-associated protein 2	351	NSYATTENKTLPR	monophos-(351)NSYATTENKTLPR		1.50872e+06															1	0	1	0	#DIV/0!	#DIV/0!	#DIV/0!	#DIV/0!
Q8BKX1	Baiap2	Brain-specific angiogenesis inhibitor 1-associated protein 2	364	SSSMAAGLER	monophos-(364)SSSMAAGLER	640725	1.37447e+06	1.60494e+06	394818	120787	520686	1.44314e+06	1.46099e+06	1.23292e+06	374644	3.34042e+06	407439		357786	842938	1.01377e+06	8	7	8	7	0.148046	0.757255	0.131519	0.424601
Q8BKX1	Baiap2	Brain-specific angiogenesis inhibitor 1-associated protein 2	452	SSSTGNLLDKDDLALPPPDYGTSSR	monophos-(452)SSSTGNLLDKDDLALPPPDYGTSSR	275399	1.91596e+06				1.93012e+06		1.45005e+06	496807					1.22655e+06		435909	4	3	3	4	0.50363	0.241497	0.551693	0.54815
Q91XV3	Basp1	Brain acid soluble protein 1	24	KAEGAGTEEEGTPK	monophos-(24)KAEGAGTEEEGTPK						5266.38								1607.33			1	1	0	2	#DIV/0!	#DIV/0!	#DIV/0!	#DIV/0!
Q91XV3	Basp1	Brain acid soluble protein 1	25	AEGAGTEEEGTPKESEPQAAADATEVK	diphos-(25)AEGAGTEEEGTPKESEPQAAADATEVK	1.62915e+06	2.08204e+06	3.15752e+06	123168	589081	322853	1.23546e+06	930216	3.50128e+06	718437	2.09674e+06	569786	308975	1.46666e+06	1.39876e+06	2.29026e+06	8	8	8	8	0.900684	0.590545	0.13986	0.19682
Q91XV3	Basp1	Brain acid soluble protein 1	25	AEGAGTEEEGTPKESEPQAAADATEVK	monophos-(25)AEGAGTEEEGTPKESEPQAAADATEVK	590386	1.22533e+06	988210		91597.2	360469	918760	556035	1.58095e+06	1.44348e+06	1.63063e+06	481019		738103	1.01064e+06	988874	7	7	7	7	0.785746	0.0666804	0.501588	0.0542572
Q91XV3	Basp1	Brain acid soluble protein 1	86	AEPEKSEGAAEEQPEPAPAPEQEAAAPGPAAGGEAPK	monophos-(86)AEPEKSEGAAEEQPEPAPAPEQEAAAPGPAAGGEAPK	312100	438036				87125.8	294449	344406	1.04568e+06	496110	680974				336866	792210	5	5	5	5	0.175571	0.0238697	0.850134	0.229508
Q91XV3	Basp1	Brain acid soluble protein 1	159	SDAAPAASDSKPSSAEPAPSSK	diphos-(159)SDAAPAASDSKPSSAEPAPSSK	38413.1																1	0	1	0	#DIV/0!	#DIV/0!	#DIV/0!	#DIV/0!
Q91XV3	Basp1	Brain acid soluble protein 1	159	SDAAPAASDSKPSSAEPAPSSK	monophos-(159)SDAAPAASDSKPSSAEPAPSSK	28641.1								42456.2								1	1	2	0	#DIV/0!	#DIV/0!	#DIV/0!	#DIV/0!
Q91XV3	Basp1	Brain acid soluble protein 1	181	ETPAASEAPSSAAK	monophos-(181)ETPAASEAPSSAAK	209802	364062	439556			94251.3	188768	178974	97035.8	153268		146998			133051	615395	6	5	6	5	0.285678	0.877048	0.35671	0.948723
Q91XV3	Basp1	Brain acid soluble protein 1	195	APAPAAPAAAEPQAEAPAAAASSEQSVAVKE	monophos-(195)APAPAAPAAAEPQAEAPAAAASSEQSVAVKE	247704	324051	326354						368268	192540					226010	228427	3	4	5	2	0.514504	0.412466	0.0363683	0.109928
Q80YN3	Bcas1	Breast carcinoma-amplified sequence 1 homolog	424	SVKEDTLSTGAEENAVCESPVETVR	monophos-(424)SVKEDTLSTGAEENAVCESPVETVR	836813	582185	1.03234e+06		99691.4	379614	646456	443556	895323	670376	1.13433e+06		85684.5	556563			7	5	6	6	0.55532	0.650679	0.82526	0.00330877
Q80YN3	Bcas1	Breast carcinoma-amplified sequence 1 homolog	522	TPSPPEPEPAGTAQK	monophos-(522)TPSPPEPEPAGTAQK							2.84956e+06	860141			756921	1.82006e+06					2	2	2	2	0.624886	0.665384	0.624886	0.665384
Q80YN3	Bcas1	Breast carcinoma-amplified sequence 1 homolog	598	RQSLGGFLK	monophos-(598)RQSLGGFLK	213508	264462	434649			100715	1.09509e+06	624215	357838		1.15131e+06	433471	81380			905286	6	5	6	5	0.695796	0.599616	0.529148	0.73204
Q80YN3	Bcas1	Breast carcinoma-amplified sequence 1 homolog	612	RMSDAQVQTDPVSIGPVGK	monophos-(612)RMSDAQVQTDPVSIGPVGK	58191.5		255803		118745			149678			419335	202911				201925	4	3	4	3	0.497433	0.157919	0.149083	0.43226
P50136	Bckdha	2-oxoisovalerate dehydrogenase subunit alpha, mitochondrial	329	IGHHSTSDDSSAYRSVDEVNYWDK	diphos-(329)IGHHSTSDDSSAYRSVDEVNYWDK	144832	126726	1.5296e+06	305728	819636			643805	1.26471e+06		1.86122e+06	508453	270187	1.02971e+06	196417	799528	6	7	7	6	0.840354	0.441376	0.108745	0.556657
P50136	Bckdha	2-oxoisovalerate dehydrogenase subunit alpha, mitochondrial	329	IGHHSTSDDSSAYR	monophos-(329)IGHHSTSDDSSAYR	845604	952808	1.75439e+06		282807	39005.9		750349	674251	248996	2.5702e+06	793827	201855		252794	1.31297e+06	6	7	7	6	0.453276	0.824722	0.293389	0.106249
P50136	Bckdha	2-oxoisovalerate dehydrogenase subunit alpha, mitochondrial	343	SVDEVNYWDKQDHPISR	monophos-(343)SVDEVNYWDKQDHPISR	270686	137121	1.37724e+06	232583	441505	99863.5	1.61369e+06	878174	560641	184959	858914	1.40987e+06	356224	70580.5	628270	1.81252e+06	8	8	8	8	0.948243	0.73313	0.573271	0.721465
O55028	Bckdk	[3-methyl-2-oxobutanoate dehydrogenase [lipoamide]] kinase, mitochondrial	30	STSATDTHHVELAR	diphos-(30)STSATDTHHVELAR															192129		0	1	0	1	#DIV/0!	#DIV/0!	#DIV/0!	#DIV/0!
O55028	Bckdk	[3-methyl-2-oxobutanoate dehydrogenase [lipoamide]] kinase, mitochondrial	30	STSATDTHHVELAR	monophos-(30)STSATDTHHVELAR			158383		2.16632e+06	610407	4.60334e+06	3.23212e+06	1.04877e+06		5.48523e+06	2.63368e+06	1.4618e+06	1.11556e+06	2.78634e+06	3.66373e+06	5	7	4	8	0.724989	0.664365	0.218034	0.908842
Q9QYE3	Bcl11a	B-cell lymphoma/leukemia 11A	79	GVDKPPSPSPIEMK	monophos-(79)GVDKPPSPSPIEMK			375329														1	0	1	0	#DIV/0!	#DIV/0!	#DIV/0!	#DIV/0!
Q9QYE3	Bcl11a	B-cell lymphoma/leukemia 11A	320	ELAGNTSSPPLSPGRPSPMQR	diphos-(320)ELAGNTSSPPLSPGRPSPMQR	199325																1	0	1	0	#DIV/0!	#DIV/0!	#DIV/0!	#DIV/0!
P59017	Bcl2l13	Bcl-2-like protein 13	338	AEKTSPTPSVFVELGEEELEAVTARPEAVER	diphos-(338)AEKTSPTPSVFVELGEEELEAVTARPEAVER	50670.6	50090.5	299701	175309		97660.7		418538		42646.5		283198	202841	18726.3		308197	6	5	6	5	0.859941	0.902743	0.542148	0.502372
P59017	Bcl2l13	Bcl-2-like protein 13	338	AEKTSPTPSVFVELGEEELEAVTARPEAVER	monophos-(338)AEKTSPTPSVFVELGEEELEAVTARPEAVER	974244	1.46952e+06	5.98441e+06	3.78575e+06	1.02088e+06	2.79663e+06	1.40262e+06	2.65586e+06	2.28506e+06	2.03435e+06	1.73247e+06	4.28156e+06	2.32556e+06	1.43431e+06	3.69216e+06	5.09097e+06	8	8	8	8	0.508623	0.656872	0.552452	0.734767
P59017	Bcl2l13	Bcl-2-like protein 13	341	TSPTPSVFVELGEEELEAVTARPEAVER	diphos-(341)TSPTPSVFVELGEEELEAVTARPEAVER	26157.7	32790.9	57108.5	48654.1		27979.1		89651.4		27519		71263.8	19527.4	28761			6	4	6	4	0.979306	0.523102	0.245866	0.881362
P41183	Bcl6	B-cell lymphoma 6 protein homolog	453	SLAGSPRSSSESHSPLYMHPPK	diphos-(453)SLAGSPRSSSESHSPLYMHPPK									167836								0	1	1	0	#DIV/0!	#DIV/0!	#DIV/0!	#DIV/0!
Q8K019	Bclaf1	Bcl-2-associated transcription factor 1	254	NTPSQHSHSIQHSPER	diphos-(254)NTPSQHSHSIQHSPER			30341.5														1	0	1	0	#DIV/0!	#DIV/0!	#DIV/0!	#DIV/0!
Q8K019	Bclaf1	Bcl-2-associated transcription factor 1	254	NTPSQHSHSIQHSPER	monophos-(254)NTPSQHSHSIQHSPER											13775.7		48799.6				0	2	1	1	#DIV/0!	#DIV/0!	#DIV/0!	#DIV/0!
Q8K019	Bclaf1	Bcl-2-associated transcription factor 1	368	ADGDWDDQEVLDYFSDKESAK	monophos-(368)ADGDWDDQEVLDYFSDKESAK			374960													356653	1	1	1	1	#DIV/0!	#DIV/0!	#DIV/0!	#DIV/0!
Q8K019	Bclaf1	Bcl-2-associated transcription factor 1	391	FHDSEGDDTEETEDYR	monophos-(391)FHDSEGDDTEETEDYR			197286								215638						1	1	2	0	#DIV/0!	#DIV/0!	#DIV/0!	#DIV/0!
Q8K019	Bclaf1	Bcl-2-associated transcription factor 1	651	RIDISPSALR	monophos-(651)RIDISPSALR													91212				0	1	0	1	#DIV/0!	#DIV/0!	#DIV/0!	#DIV/0!
Q8K019	Bclaf1	Bcl-2-associated transcription factor 1	652	IDISPSALR	monophos-(652)IDISPSALR			232448				261366									246609	2	1	1	2	#DIV/0!	#DIV/0!	#DIV/0!	#DIV/0!
Q571C7	Bdp1	Transcription factor TFIIIB component B'' homolog	1475	VSECQVSESQGHADPVENLSVNKASVVHEQMR	diphos-(1475)VSECQVSESQGHADPVENLSVNKASVVHEQMR				156517								2.67639e+06					1	1	2	0	#DIV/0!	#DIV/0!	#DIV/0!	#DIV/0!
Q68EF6	Begain	Brain-enriched guanylate kinase-associated protein	223	GDIYCSDPALYCPDER	monophos-(223)GDIYCSDPALYCPDER	140083																1	0	1	0	#DIV/0!	#DIV/0!	#DIV/0!	#DIV/0!
Q68EF6	Begain	Brain-enriched guanylate kinase-associated protein	243	RPSVDTPVTDVGFLR	diphos-(243)RPSVDTPVTDVGFLR															500494		0	1	0	1	#DIV/0!	#DIV/0!	#DIV/0!	#DIV/0!
Q68EF6	Begain	Brain-enriched guanylate kinase-associated protein	243	RPSVDTPVTDVGFLR	monophos-(243)RPSVDTPVTDVGFLR							244632								431000		1	1	0	2	#DIV/0!	#DIV/0!	#DIV/0!	#DIV/0!
O35623	Bet1	BET1 homolog	47	SLSIEIGHEVK	monophos-(47)SLSIEIGHEVK		91078.1					1.00904e+06	408316			137480				235292		3	2	2	3	0.208652	0.431901	0.114075	0.245472
Q8C6A8	Bhlhe22	Class E basic helix-loop-helix protein 22	173	VAEGCSNAHLHGGSGLPPGGPTSGGGSGGGGGGSSKK	diphos-(173)VAEGCSNAHLHGGSGLPPGGPTSGGGSGGGGGGSSKK											267767						0	1	1	0	#DIV/0!	#DIV/0!	#DIV/0!	#DIV/0!
O08539	Bin1	Myc box-dependent-interacting protein 1	292	GNKSPSPPPDGSPAATPEIR	diphos-(292)GNKSPSPPPDGSPAATPEIR	4.92457e+07	2.98582e+07	7.27297e+07	6.33357e+07	1.7595e+07	1.43301e+07	6.27858e+07	4.50938e+07	5.56744e+07	4.44507e+07	8.90358e+07	3.61768e+07	1.25975e+07	2.5943e+07	3.96431e+07	8.71198e+07	8	8	8	8	0.573009	0.724192	0.450655	0.166241
O08539	Bin1	Myc box-dependent-interacting protein 1	292	GNKSPSPPPDGSPAATPEIR	monophos-(292)GNKSPSPPPDGSPAATPEIR	7.51422e+06	8.06062e+06	1.86639e+07	1.17206e+07	4.05269e+06	2.75978e+06	2.24986e+07	2.03672e+07	1.23973e+07	1.43135e+07	4.13855e+07	1.54667e+07	3.63572e+06	4.46981e+06	1.73719e+07	2.59345e+07	8	8	8	8	0.240828	0.350234	0.803449	0.502916
O08539	Bin1	Myc box-dependent-interacting protein 1	312	VNHEPEPASGASPGATIPK	monophos-(312)VNHEPEPASGASPGATIPK	248773								674274		473989						1	2	3	0	#DIV/0!	#DIV/0!	#DIV/0!	#DIV/0!
Q5U5M8	Bloc1s3	Biogenesis of lysosome-related organelles complex 1 subunit 3	51	VAGEAAETDSEPEPEPTVVPVDLPPLVVQR	diphos-(51)VAGEAAETDSEPEPEPTVVPVDLPPLVVQR											258029	405799				248124	0	3	2	1	#DIV/0!	#DIV/0!	#DIV/0!	#DIV/0!
Q9CY64	Blvra	Biliverdin reductase A	233	SGSLEEVPNVGVNK	monophos-(233)SGSLEEVPNVGVNK	168494	613168	324952	300502	1.10086e+06	1.0415e+06	460228	878916	488613	343780	437146	286156	1.44102e+06	848132	426427	464712	8	8	8	8	0.866333	0.919259	0.0201299	0.00842475
P98063	Bmp1	Bone morphogenetic protein 1	165	HTCVTFLERTDEDSYIVFTYRPCGCCSYVGR	monophos-(165)HTCVTFLERTDEDSYIVFTYRPCGCCSYVGR					252683												1	0	0	1	#DIV/0!	#DIV/0!	#DIV/0!	#DIV/0!
O35607	Bmpr2	Bone morphogenetic protein receptor type-2	512	SVSPTVNPMSTAMQNER	monophos-(512)SVSPTVNPMSTAMQNER	826106	403716	545225		183289	486733	1.29338e+06	267100	591558	533201	510220	345192		236787	803818	391182	7	7	7	7	0.104196	0.60512	0.0354422	0.936581
O35607	Bmpr2	Bone morphogenetic protein receptor type-2	857	LNINSSPDEHEPLLR	diphos-(857)LNINSSPDEHEPLLR			343855				617533	365486							240583		3	1	1	3	#DIV/0!	#DIV/0!	#DIV/0!	#DIV/0!
O35607	Bmpr2	Bone morphogenetic protein receptor type-2	857	LNINSSPDEHEPLLR	monophos-(857)LNINSSPDEHEPLLR	207217	223043	625441			56210.8		456545				275296				754534	5	2	4	3	0.414725	0.384237	0.365864	0.680894
O54940	Bnip2	BCL2/adenovirus E1B 19 kDa protein-interacting protein 2	111	KGSITEYTATEEK	monophos-(111)KGSITEYTATEEK	148910	945505	493211		205785	296551		374955	344502	247250	342315						6	3	6	3	0.0719583	0.585433	0.169888	0.479813
O55003	Bnip3	BCL2/adenovirus E1B 19 kDa protein-interacting protein 3	54	SSHCDSPPRSQTPQDTNR	diphos-(54)SSHCDSPPRSQTPQDTNR		242187	193642	38109.4	41491.3	17161.7					561437	30790.2		94388.4		85147.1	5	4	5	4	0.125857	0.496879	0.0149858	0.188143
O55003	Bnip3	BCL2/adenovirus E1B 19 kDa protein-interacting protein 3	54	SSHCDSPPRSQTPQDTNR	monophos-(54)SSHCDSPPRSQTPQDTNR			37716.2								47125.3						1	1	2	0	#DIV/0!	#DIV/0!	#DIV/0!	#DIV/0!
O55003	Bnip3	BCL2/adenovirus E1B 19 kDa protein-interacting protein 3	72	AEIDSHSFGEKNSTLSEEDYIER	diphos-(72)AEIDSHSFGEKNSTLSEEDYIER						132236					748379						1	1	1	1	#DIV/0!	#DIV/0!	#DIV/0!	#DIV/0!
O55003	Bnip3	BCL2/adenovirus E1B 19 kDa protein-interacting protein 3	83	NSTLSEEDYIER	monophos-(83)NSTLSEEDYIER	960588	887922	1.32285e+06	1.2098e+06	1.35494e+06	524074	2.16885e+06	1.33312e+06	1.02286e+06	1.35796e+06	1.88996e+06	1.53215e+06	364003	738528	1.03331e+06	2.16694e+06	8	8	8	8	0.577529	0.876004	0.0732916	0.820142
O35425	Bok	Bcl-2-related ovarian killer protein	6	SSVFAAEIMDAFDR	monophos-(6)SSVFAAEIMDAFDR							103704										1	0	0	1	#DIV/0!	#DIV/0!	#DIV/0!	#DIV/0!
P28028	Braf	Serine/threonine-protein kinase B-raf	130	NNPKSPQKPIVR	monophos-(130)NNPKSPQKPIVR		20380.3	135047	94599.3		33052.8	386470				219230	207367				422301	5	3	5	3	0.869769	0.195122	0.102575	0.208594
P28028	Braf	Serine/threonine-protein kinase B-raf	345	SSSAPNVHINTIEPVNIDEKFPEVELQDQR	monophos-(345)SSSAPNVHINTIEPVNIDEKFPEVELQDQR		226596	871200		610762		383081	147252	160952	225570		552354	1.36196e+06			502693	5	5	5	5	0.372248	0.665553	0.434445	0.452489
P28028	Braf	Serine/threonine-protein kinase B-raf	480	RDSSDDWEIPDGQITVGQR	diphos-(480)RDSSDDWEIPDGQITVGQR													237752				0	1	0	1	#DIV/0!	#DIV/0!	#DIV/0!	#DIV/0!
P28028	Braf	Serine/threonine-protein kinase B-raf	480	RDSSDDWEIPDGQITVGQR	monophos-(480)RDSSDDWEIPDGQITVGQR	356796	1.33807e+06	2.70427e+06	2.46786e+06	2.26428e+06	642317	1.52627e+06	665104	2.04918e+06	3.17518e+06	710193	4.80643e+06	2.33039e+06	518376	706514	1.05746e+06	8	8	8	8	0.20652	0.505113	0.101542	0.10613
P28028	Braf	Serine/threonine-protein kinase B-raf	763	SASEPSLNR	monophos-(763)SASEPSLNR	438723	1.65633e+06	2.4419e+06	818217			1.90422e+06	1.05329e+06	1.0702e+06	2.25219e+06	1.57066e+06	1.98444e+06	926679	269950	386102	1.28722e+06	6	8	8	6	0.858319	0.676366	0.751525	0.146073
P28028	Braf	Serine/threonine-protein kinase B-raf	772	AGFQTEDFSLYACASPK	monophos-(772)AGFQTEDFSLYACASPK		330787							210258	266898			183726				1	3	3	1	#DIV/0!	#DIV/0!	#DIV/0!	#DIV/0!
Q99MP8	Brap	BRCA1-associated protein	104	EQSESVNTAPESPSK	monophos-(104)EQSESVNTAPESPSK							332273										1	0	0	1	#DIV/0!	#DIV/0!	#DIV/0!	#DIV/0!
Q99MP8	Brap	BRCA1-associated protein	262	CTVCLERMDESVNGILTTLCNHSFHSQCLQR	monophos-(262)CTVCLERMDESVNGILTTLCNHSFHSQCLQR		709398	1.09925e+07		1.4804e+07						5.17332e+07		9.06146e+06	967496			3	3	3	3	0.133374	0.510808	0.124466	0.468628
Q5RJI5	Brsk1	Serine/threonine-protein kinase BRSK1	398	SMEVLSITDAGSGGSPVPTR	diphos-(398)SMEVLSITDAGSGGSPVPTR		278664															1	0	1	0	#DIV/0!	#DIV/0!	#DIV/0!	#DIV/0!
Q5RJI5	Brsk1	Serine/threonine-protein kinase BRSK1	398	SMEVLSITDAGSGGSPVPTR	monophos-(398)SMEVLSITDAGSGGSPVPTR	307642	541253		467228		243169	660133		587167	374528	672336			234293	480041	619835	5	6	6	5	0.935803	0.629302	0.408091	0.675112
Q5RJI5	Brsk1	Serine/threonine-protein kinase BRSK1	429	SRSVSGASTGLSSSPLSSPR	diphos-(429)SRSVSGASTGLSSSPLSSPR														69635.9			0	1	0	1	#DIV/0!	#DIV/0!	#DIV/0!	#DIV/0!
Q5RJI5	Brsk1	Serine/threonine-protein kinase BRSK1	431	SVSGASTGLSSSPLSSPR	diphos-(431)SVSGASTGLSSSPLSSPR					1.00563e+06												1	0	0	1	#DIV/0!	#DIV/0!	#DIV/0!	#DIV/0!
Q5RJI5	Brsk1	Serine/threonine-protein kinase BRSK1	449	SPVFSFSPEPGAGDEAR	monophos-(449)SPVFSFSPEPGAGDEAR	167020	334045	525051	472227		245187	454944	275155	299965	385116	339581		164973	222792	4.17002e+06		7	6	7	6	7.68158e-06	0.415336	3.48567e-06	0.428155
Q5RJI5	Brsk1	Serine/threonine-protein kinase BRSK1	498	STPLPGPPGSPR	diphos-(498)STPLPGPPGSPR					75252.5												1	0	0	1	#DIV/0!	#DIV/0!	#DIV/0!	#DIV/0!
Q5RJI5	Brsk1	Serine/threonine-protein kinase BRSK1	498	STPLPGPPGSPR	monophos-(498)STPLPGPPGSPR	353119	612328	628276	526563		172851		733202	524698	747705	394750	450610	189384	158668	523412	612783	6	8	8	6	0.91242	0.630378	0.11012	0.230736
Q5RJI5	Brsk1	Serine/threonine-protein kinase BRSK1	510	SSGGTPLHSPLHTPR	diphos-(510)SSGGTPLHSPLHTPR							494584										1	0	0	1	#DIV/0!	#DIV/0!	#DIV/0!	#DIV/0!
Q5RJI5	Brsk1	Serine/threonine-protein kinase BRSK1	510	SSGGTPLHSPLHTPR	monophos-(510)SSGGTPLHSPLHTPR								192735									1	0	0	1	#DIV/0!	#DIV/0!	#DIV/0!	#DIV/0!
Q5RJI5	Brsk1	Serine/threonine-protein kinase BRSK1	525	ASPTGTPGTTPPPSPGGGVGGAAWR	diphos-(525)ASPTGTPGTTPPPSPGGGVGGAAWR					2.43351e+06										279813		1	1	0	2	#DIV/0!	#DIV/0!	#DIV/0!	#DIV/0!
Q5RJI5	Brsk1	Serine/threonine-protein kinase BRSK1	525	ASPTGTPGTTPPPSPGGGVGGAAWR	monophos-(525)ASPTGTPGTTPPPSPGGGVGGAAWR			706666				1.0445e+06		307915		400587	519455					2	3	4	1	0.306111	0.0518025	#DIV/0!	#DIV/0!
Q5RJI5	Brsk1	Serine/threonine-protein kinase BRSK1	557	NSFLGSPR	monophos-(557)NSFLGSPR	455725	1.10765e+06	1.17296e+06	466175	716063	406339	844820	1.00307e+06	664412	1.22305e+06	2.52713e+06	369731	616076	479539	367598	521278	8	8	8	8	0.0358882	0.796412	0.00666867	0.185235
Q5RJI5	Brsk1	Serine/threonine-protein kinase BRSK1	570	MQVPTAEEMSSLTPESSPELAK	diphos-(570)MQVPTAEEMSSLTPESSPELAK		153512	419390	255969										197891			3	1	3	1	#DIV/0!	#DIV/0!	#DIV/0!	#DIV/0!
Q5RJI5	Brsk1	Serine/threonine-protein kinase BRSK1	570	MQVPTAEEMSSLTPESSPELAKR	monophos-(570)MQVPTAEEMSSLTPESSPELAKR			328897														1	0	1	0	#DIV/0!	#DIV/0!	#DIV/0!	#DIV/0!
Q5RJI5	Brsk1	Serine/threonine-protein kinase BRSK1	679	DGSSGGGIYSVTFTLISGPSR	diphos-(679)DGSSGGGIYSVTFTLISGPSR										2.29927e+07							0	1	1	0	#DIV/0!	#DIV/0!	#DIV/0!	#DIV/0!
Q69Z98	Brsk2	Serine/threonine-protein kinase BRSK2	382	SMEVLSVTDGGSPVPAR	diphos-(382)SMEVLSVTDGGSPVPAR	148830	409864	1.33092e+06	456937	187849	301105	580451	629723			472841			366982	417664		8	3	5	6	0.0393868	0.543067	0.0532761	0.464269
Q69Z98	Brsk2	Serine/threonine-protein kinase BRSK2	382	SMEVLSVTDGGSPVPAR	monophos-(382)SMEVLSVTDGGSPVPAR	829358	1.48537e+06	659652	1.09371e+06	274006	1.01415e+06			889702	1.49148e+06	1.41347e+06		643563	1.05053e+06			6	5	7	4	0.800333	0.405354	0.821789	0.119684
Q69Z98	Brsk2	Serine/threonine-protein kinase BRSK2	410	SRSISGASSGLSTSPLSSPR	diphos-(410)SRSISGASSGLSTSPLSSPR		194873	1.32914e+06		540837		320826		199374	572590	235272		516752	151353			4	5	5	4	0.0942464	0.320283	0.139892	0.647658
Q69Z98	Brsk2	Serine/threonine-protein kinase BRSK2	410	SRSISGASSGLSTSPLSSPR	monophos-(410)SRSISGASSGLSTSPLSSPR													73816.1				0	1	0	1	#DIV/0!	#DIV/0!	#DIV/0!	#DIV/0!
Q69Z98	Brsk2	Serine/threonine-protein kinase BRSK2	412	SISGASSGLSTSPLSSPR	diphos-(412)SISGASSGLSTSPLSSPR		639674			300057		268985			832576	386627			319366			3	3	3	3	0.704283	0.611857	0.0255052	0.127397
Q69Z98	Brsk2	Serine/threonine-protein kinase BRSK2	412	SISGASSGLSTSPLSSPR	monophos-(412)SISGASSGLSTSPLSSPR		316966			236897				299633	357494			121055	61086.6			2	4	3	3	0.569141	0.570552	0.198842	0.0272082
Q69Z98	Brsk2	Serine/threonine-protein kinase BRSK2	446	GTPVHTPKESPAGTPNPTPPSSPSVGGVPWR	diphos-(446)GTPVHTPKESPAGTPNPTPPSSPSVGGVPWR		262035								380730			356268				1	2	2	1	#DIV/0!	#DIV/0!	#DIV/0!	#DIV/0!
Q69Z98	Brsk2	Serine/threonine-protein kinase BRSK2	484	NSFLGSPR	monophos-(484)NSFLGSPR	455725	1.10765e+06	1.17296e+06	466175	716063	406339	844820	1.00307e+06	664412	1.22305e+06	2.52713e+06	369731	616076	479539	367598	521278	8	8	8	8	0.0358882	0.796412	0.00666867	0.185235
Q69Z98	Brsk2	Serine/threonine-protein kinase BRSK2	496	KLQVPTPEEMSNLTPESSPELAK	diphos-(496)KLQVPTPEEMSNLTPESSPELAK	359338	1.77427e+06	4.45056e+06	865713		528070	1.08512e+06	1.32777e+06		1.58933e+06	848727		1.40599e+06	1.121e+06			7	4	6	5	0.0366026	0.672035	0.0148058	0.406989
Q69Z98	Brsk2	Serine/threonine-protein kinase BRSK2	497	LQVPTPEEMSNLTPESSPELAKK	diphos-(497)LQVPTPEEMSNLTPESSPELAKK	414849	779672	2.04595e+06	482357	1.00656e+06	776166	1.86572e+06		415056	451871	626873	833391	1.66258e+06	1.90144e+06	410936	3.0821e+06	7	8	8	7	0.355598	0.785324	0.225272	0.0603854
Q80Y55	Bsdc1	BSD domain-containing protein 1	210	ADQSISEEPGWEEEEEELEGIVPSPK	diphos-(210)ADQSISEEPGWEEEEEELEGIVPSPK		50245.2												187705			1	1	1	1	#DIV/0!	#DIV/0!	#DIV/0!	#DIV/0!
Q80Y55	Bsdc1	BSD domain-containing protein 1	210	ADQSISEEPGWEEEEEELEGIVPSPK	monophos-(210)ADQSISEEPGWEEEEEELEGIVPSPK		201529												166143			1	1	1	1	#DIV/0!	#DIV/0!	#DIV/0!	#DIV/0!
O88737	Bsn	Protein bassoon	234	SQQQLHSPALSPAHSPAK	diphos-(234)SQQQLHSPALSPAHSPAK						124686								77042.1			1	1	0	2	#DIV/0!	#DIV/0!	#DIV/0!	#DIV/0!
O88737	Bsn	Protein bassoon	775	RPHSLSITPEAFDSDEELGDILEEDDSLAWGR	monophos-(775)RPHSLSITPEAFDSDEELGDILEEDDSLAWGR			3.32936e+06	531797		349682		264898				1.83569e+06	152151	154893		3.57842e+06	4	4	3	5	0.870446	0.787156	0.970255	0.387125
O88737	Bsn	Protein bassoon	826	HDYVEDSSEGGLSPLPPQPPAR	diphos-(826)HDYVEDSSEGGLSPLPPQPPAR					64073.4												1	0	0	1	#DIV/0!	#DIV/0!	#DIV/0!	#DIV/0!
O88737	Bsn	Protein bassoon	859	QILEMSAEEDNLEEDDTAVSGR	monophos-(859)QILEMSAEEDNLEEDDTAVSGR		787430													292844		1	1	1	1	#DIV/0!	#DIV/0!	#DIV/0!	#DIV/0!
O88737	Bsn	Protein bassoon	942	TIELNSTGSYGHELDLGQGPDPNLDREPELEMESLTGSPEDR	monophos-(942)TIELNSTGSYGHELDLGQGPDPNLDREPELEMESLTGSPEDR			254123										56397.8				1	1	1	1	#DIV/0!	#DIV/0!	#DIV/0!	#DIV/0!
O88737	Bsn	Protein bassoon	986	GEHSSTLPASTPSYTSGTSPTSLSSLEEDSDSSPSR	diphos-(986)GEHSSTLPASTPSYTSGTSPTSLSSLEEDSDSSPSR											145093						0	1	1	0	#DIV/0!	#DIV/0!	#DIV/0!	#DIV/0!
O88737	Bsn	Protein bassoon	1038	SHGPLLPTIEDSSEEEELREEEELLR	diphos-(1038)SHGPLLPTIEDSSEEEELREEEELLR	65757.2	94981.1	1.63159e+06	151109		127259	1.10807e+06	453192	160992		565594	406253	131854	62597	445403	368841	7	7	7	7	0.0109284	0.409051	0.305242	0.832096
O88737	Bsn	Protein bassoon	1038	SHGPLLPTIEDSSEEEELREEEELLR	monophos-(1038)SHGPLLPTIEDSSEEEELREEEELLR	81114								370431	73228.2							1	2	3	0	#DIV/0!	#DIV/0!	#DIV/0!	#DIV/0!
O88737	Bsn	Protein bassoon	1099	SKTPPSNLSPIEDASPTEELR	diphos-(1099)SKTPPSNLSPIEDASPTEELR			8.85406e+07	4.9772e+07	3.58631e+06	4.64658e+07	1.17177e+06	4.11071e+07		5.93816e+07	3.80825e+07	4.43472e+07	2.95571e+06	853977	1.99759e+06	541579	6	7	5	8	0.548934	0.304319	0.908823	0.00243376
O88737	Bsn	Protein bassoon	1101	TPPSNLSPIEDASPTEELR	diphos-(1101)TPPSNLSPIEDASPTEELR	1.61864e+06	1.64641e+06	2.40894e+06	5.78231e+06	1.06158e+06	975161	1.11873e+07	1.92152e+06	4.19089e+06	6.35042e+06	1.45929e+06	5.13229e+06	1.22296e+06	1.33678e+06	1.18058e+07	2.50237e+06	8	8	8	8	0.957191	0.611849	0.0433045	0.816592
O88737	Bsn	Protein bassoon	1232	SQGSFEYQDTQDHDYGGR	monophos-(1232)SQGSFEYQDTQDHDYGGR	1.35448e+06	737098	1.98491e+06	1.41549e+06	145313	718491	1.79997e+06	671587	1.24435e+06	1.4202e+06	1.08944e+06	737419	368814	477423	1.18242e+06	1.75614e+06	8	8	8	8	0.465501	0.809207	0.279436	0.196299
O88737	Bsn	Protein bassoon	1455	EKPLSGGDSEVGAPQPSR	monophos-(1455)EKPLSGGDSEVGAPQPSR											29176						0	1	1	0	#DIV/0!	#DIV/0!	#DIV/0!	#DIV/0!
O88737	Bsn	Protein bassoon	1473	GYSYFTGSSPPLSPSTPSESPTFSPGK	diphos-(1473)GYSYFTGSSPPLSPSTPSESPTFSPGK	1.67755e+06	180519	1.50663e+06	782760	1.24026e+06	793710	1.3398e+06	395898	1.33529e+06	1.02355e+06	538072	679838	973507	1.02731e+06	729472	1.36853e+06	8	8	8	8	0.146032	0.891393	0.28225	0.935022
O88737	Bsn	Protein bassoon	1473	GYSYFTGSSPPLSPSTPSESPTFSPGKLGPR	monophos-(1473)GYSYFTGSSPPLSPSTPSESPTFSPGKLGPR						78620.8											1	0	0	1	#DIV/0!	#DIV/0!	#DIV/0!	#DIV/0!
O88737	Bsn	Protein bassoon	1620	APSAGTDGPLALYGWGALPAENISLCRISSVPGTSR	diphos-(1620)APSAGTDGPLALYGWGALPAENISLCRISSVPGTSR				55229.3													1	0	1	0	#DIV/0!	#DIV/0!	#DIV/0!	#DIV/0!
O88737	Bsn	Protein bassoon	2036	YLGQGLQYGSFTDLR	monophos-(2036)YLGQGLQYGSFTDLR	79298.4	59002.2	302179	254950		160054		188279	85059.8	75646.5	274292		195093		205463	270720	6	6	7	5	0.842074	0.847279	0.078159	0.432278
O88737	Bsn	Protein bassoon	2065	YSSVSNIYSDHR	monophos-(2065)YSSVSNIYSDHR	472260	452874	370891						440103	210486				112119			3	3	5	1	0.185463	0.156376	#DIV/0!	#DIV/0!
O88737	Bsn	Protein bassoon	2571	DACEPESGPDPSTVR	monophos-(2571)DACEPESGPDPSTVR	195330								396770	489960					8.06363e+06		1	3	3	1	#DIV/0!	#DIV/0!	#DIV/0!	#DIV/0!
O88737	Bsn	Protein bassoon	2587	IADSSVQTDDEEGEGR	monophos-(2587)IADSSVQTDDEEGEGR	584231	495318	627591	394917		256642	1.13956e+06	490436	934209	805141	475336	392684		246374	876110	678946	7	7	8	6	0.883241	0.686122	0.150067	0.862826
O88737	Bsn	Protein bassoon	2614	SADCSVQTDDEDNADWEQPVRR	monophos-(2614)SADCSVQTDDEDNADWEQPVRR	207897					118161			387070	328195				95609.4			2	3	3	2	0.559047	0.436032	0.245082	0.0610886
O88737	Bsn	Protein bassoon	2643	HSDSGSDSKHDATASSSTTAAATAR	monophos-(2643)HSDSGSDSKHDATASSSTTAAATAR	259969		309525		25171.8				113481	267087	89169.4	60391.7			39507.7		3	5	6	2	0.341225	0.352217	0.143064	0.108587
O88737	Bsn	Protein bassoon	2652	HDATASSSTTAAATAR	diphos-(2652)HDATASSSTTAAATAR					202968												1	0	0	1	#DIV/0!	#DIV/0!	#DIV/0!	#DIV/0!
O88737	Bsn	Protein bassoon	2652	HDATASSSTTAAATAR	monophos-(2652)HDATASSSTTAAATAR													207095				0	1	0	1	#DIV/0!	#DIV/0!	#DIV/0!	#DIV/0!
O88737	Bsn	Protein bassoon	2857	SLSDPKPLSPTAEESAK	diphos-(2857)SLSDPKPLSPTAEESAK	3.96897e+06	2.00354e+06	4.71915e+06	4.25494e+06	859736	1.97867e+06	7.19704e+06	3.41465e+06	4.32119e+06	2.95804e+06	1.94565e+06	3.05557e+06	736239	1.85933e+06	8.25397e+06	4.96179e+06	8	8	8	8	0.663248	0.972512	0.0183492	0.819896
O88737	Bsn	Protein bassoon	2857	SLSDPKPLSPTAEESAK	monophos-(2857)SLSDPKPLSPTAEESAK	2.33194e+06	1.25309e+06	1.77659e+06	2.14979e+06	322851	1.21929e+06	4.0928e+06	1.3619e+06	2.43493e+06	5.19632e+06	1.20181e+06	1.43666e+06	796362	644942	4.1476e+06	3.89987e+06	8	8	8	8	0.263561	0.383306	0.509059	0.831878
O88737	Bsn	Protein bassoon	3018	DYLSDSELNQLR	monophos-(3018)DYLSDSELNQLR	246908	203132	352518	507201		224191	540976	395393	961026	327558	660863	261391		180342	1.18366e+06	663959	7	7	8	6	0.0263447	0.134565	0.384418	0.594761
O88737	Bsn	Protein bassoon	3155	QTSLADLEQK	monophos-(3155)QTSLADLEQK						139958											1	0	0	1	#DIV/0!	#DIV/0!	#DIV/0!	#DIV/0!
O88737	Bsn	Protein bassoon	3296	GEEESEEDSYDPR	monophos-(3296)GEEESEEDSYDPR				278862		143680	576991				285521	259263		155570	702343	481164	3	5	3	5	0.862233	0.793794	0.00585454	0.290193
O88737	Bsn	Protein bassoon	3454	MASAYSGEKLSSHDYSSR	diphos-(3454)MASAYSGEKLSSHDYSSR							4.17868e+06					2.87506e+06					1	1	1	1	#DIV/0!	#DIV/0!	#DIV/0!	#DIV/0!
Q9CQH7	Btf3l4	Transcription factor BTF3 homolog 4	128	APKPEDIDEEDDDVPDLVENFDEASKNEAN	monophos-(128)APKPEDIDEEDDDVPDLVENFDEASKNEAN											154869						0	1	1	0	#DIV/0!	#DIV/0!	#DIV/0!	#DIV/0!
O54825	Bysl	Bystin	87	LGPGLPQDGSDEEDEEWPTLEK	monophos-(87)LGPGLPQDGSDEEDEEWPTLEK	106112	121346	452786				242840	492104	225135	210984	475979					813942	5	4	6	3	0.411528	0.368403	0.26058	0.127055
Q9CQC6	Bzw1	Basic leucine zipper and W2 domain-containing protein 1	405	NAEEESESEAEEGD	monophos-(405)NAEEESESEAEEGD																105217	0	1	0	1	#DIV/0!	#DIV/0!	#DIV/0!	#DIV/0!
Q91VK1	Bzw2	Basic leucine zipper and W2 domain-containing protein 2	400	FVEWLQNAEEESESEGEES	diphos-(400)FVEWLQNAEEESESEGEES			297182	189860				662298			1.19757e+06	203310				901659	3	3	4	2	0.381014	0.305749	0.498623	0.451357
Q80X80	C2cd2l	C2 domain-containing protein 2-like	355	SSSCGDAELLGQATLPVGSPSRPMSR	diphos-(355)SSSCGDAELLGQATLPVGSPSRPMSR	592890	370819	1.38466e+06	320579	1.02084e+06		315364	333464	1.15132e+06	269411	1.15052e+06	757845		542172	300030	343276	7	7	8	6	0.822648	0.909268	0.361585	0.203232
Q80X80	C2cd2l	C2 domain-containing protein 2-like	355	SSSCGDAELLGQATLPVGSPSRPMSR	monophos-(355)SSSCGDAELLGQATLPVGSPSRPMSR	290181		512036			343711			436383	345990	511531			177691			3	4	5	2	0.833492	0.895386	0.605216	0.125729
Q80X80	C2cd2l	C2 domain-containing protein 2-like	393	SLSPAATVTAELHYEQGSPR	diphos-(393)SLSPAATVTAELHYEQGSPR	392188	189178	3.25956e+06	2.51047e+06	2.78912e+06	458297	289709	1.54237e+06	657730	283576	948866	60744.9	635273	790479	1.63973e+06	201339	8	8	8	8	0.0262917	0.140969	0.455038	0.991783
Q80X80	C2cd2l	C2 domain-containing protein 2-like	393	SLSPAATVTAELHYEQGSPR	monophos-(393)SLSPAATVTAELHYEQGSPR				225932	3.04555e+06		2.13146e+06	224182			783443	571874				157444	4	3	3	4	0.0972202	0.33738	0.0746394	0.361485
Q80X80	C2cd2l	C2 domain-containing protein 2-like	413	NLGTPTSSTPRPSITPTKK	diphos-(413)NLGTPTSSTPRPSITPTKK	848964	904873	2.8932e+06	3.83122e+06	1.33732e+07	1.07461e+06	1.49183e+06	1.97006e+06	892983	1.98836e+06	2.49597e+06	1.95559e+06	1.02979e+06	999051	1.60176e+06	2.70598e+06	8	8	8	8	0.000110245	0.324504	0.00188798	0.512952
Q80X80	C2cd2l	C2 domain-containing protein 2-like	413	NLGTPTSSTPRPSITPTK	monophos-(413)NLGTPTSSTPRPSITPTK		231079	371465			54010.3											3	0	2	1	#DIV/0!	#DIV/0!	#DIV/0!	#DIV/0!
Q80X80	C2cd2l	C2 domain-containing protein 2-like	605	SDISERPSVDDVESETGSTGALETR	diphos-(605)SDISERPSVDDVESETGSTGALETR	8.08832e+06	2.14241e+06	1.43425e+07	4.07342e+06	7.68077e+06	2.30369e+06	3.2173e+06	3.74225e+06	9.66045e+06	4.89309e+06	5.0202e+06	4.56185e+06	3.89544e+06	3.2685e+06	3.22474e+06	4.25065e+06	8	8	8	8	0.0832907	0.611771	0.0325389	0.109515
Q80X80	C2cd2l	C2 domain-containing protein 2-like	605	SDISERPSVDDVESETGSTGALETR	monophos-(605)SDISERPSVDDVESETGSTGALETR	2.47096e+06	969690	5.30257e+06	653525	1.28487e+06	108817	804879	314302	7.69898e+06	4.87103e+06	2.6322e+06	1.1908e+06	1.1243e+06	155040	435646	739655	8	8	8	8	0.267344	0.448406	0.000162292	0.0215714
Q80X80	C2cd2l	C2 domain-containing protein 2-like	653	QKEAGLSQSHDDLSNTTATPSVR	monophos-(653)QKEAGLSQSHDDLSNTTATPSVR		710559												194078			1	1	1	1	#DIV/0!	#DIV/0!	#DIV/0!	#DIV/0!
Q80X80	C2cd2l	C2 domain-containing protein 2-like	655	EAGLSQSHDDLSNTTATPSVR	monophos-(655)EAGLSQSHDDLSNTTATPSVR	786866	3.1102e+06	1.44988e+06	9.9272e+06		1.03554e+06	1.00423e+06	1.50216e+06	1.38229e+06	1.24214e+06	1.44661e+06			1.36783e+06	876741	2.46406e+06	7	6	7	6	0.00101535	0.366521	0.00170305	0.305609
Q5HZI2	C2cd4cC2CD4 family	C2 calcium-dependent domain-containing protein 4C	140	AQTSYGFATLAESPHTR	monophos-(140)AQTSYGFATLAESPHTR		47841.1															1	0	1	0	#DIV/0!	#DIV/0!	#DIV/0!	#DIV/0!
Q5HZI2	C2cd4cC2CD4 family	C2 calcium-dependent domain-containing protein 4C	256	HGSLSADDSTPDTSPGVR	diphos-(256)HGSLSADDSTPDTSPGVR		410857	564803														2	0	2	0	#DIV/0!	#DIV/0!	#DIV/0!	#DIV/0!
Q5HZI2	C2cd4cC2CD4 family	C2 calcium-dependent domain-containing protein 4C	256	HGSLSADDSTPDTSPGVR	monophos-(256)HGSLSADDSTPDTSPGVR	686394	1.276e+06	1.33857e+06		172289	332237	536846		1.11323e+06	766519	1.13992e+06		180120	222176	434247		6	6	6	6	0.79213	0.765434	0.223199	0.00014766
Q5HZI2	C2cd4cC2CD4 family	C2 calcium-dependent domain-containing protein 4C	279	RATPEPGPESGQAPR	monophos-(279)RATPEPGPESGQAPR	147277	199157	195717			82766.7			153596								4	1	4	1	#DIV/0!	#DIV/0!	#DIV/0!	#DIV/0!
P00920	Ca2	Carbonic anhydrase 2	80	GGPLSDSYR	monophos-(80)GGPLSDSYR											191689						0	1	1	0	#DIV/0!	#DIV/0!	#DIV/0!	#DIV/0!
Q9ERQ8	Ca7	Carbonic anhydrase 7	0	MTGHHCWGYGQDDGPSNWHKLYPIAQGDR	monophos-(0)MTGHHCWGYGQDDGPSNWHKLYPIAQGDR				515086													1	0	1	0	#DIV/0!	#DIV/0!	#DIV/0!	#DIV/0!
Q9ESJ1	Cables1	CDK5 and ABL1 enzyme substrate 1	250	SSLETLEDIEENAPLRR	monophos-(250)SSLETLEDIEENAPLRR		488583															1	0	1	0	#DIV/0!	#DIV/0!	#DIV/0!	#DIV/0!
P97445	Cacna1a	Voltage-dependent P/Q-type calcium channel subunit alpha-1A	744	AKEVAEVSPLSAANMSIAVK	diphos-(744)AKEVAEVSPLSAANMSIAVK		103327	560592				411299		155808	311513			389345		311993		3	4	4	3	0.191668	0.62337	0.122614	0.509269
O55017	Cacna1b	Voltage-dependent N-type calcium channel subunit alpha-1B	739	EVAEVSPMSAANISIAAR	diphos-(739)EVAEVSPMSAANISIAAR		235927															1	0	1	0	#DIV/0!	#DIV/0!	#DIV/0!	#DIV/0!
O55017	Cacna1b	Voltage-dependent N-type calcium channel subunit alpha-1B	889	SHSKETPGADTQVR	monophos-(889)SHSKETPGADTQVR							149155			48796.3							1	1	1	1	#DIV/0!	#DIV/0!	#DIV/0!	#DIV/0!
O55017	Cacna1b	Voltage-dependent N-type calcium channel subunit alpha-1B	2218	GLSEHNALLQK	monophos-(2218)GLSEHNALLQK		185898															1	0	1	0	#DIV/0!	#DIV/0!	#DIV/0!	#DIV/0!
O55017	Cacna1b	Voltage-dependent N-type calcium channel subunit alpha-1B	2241	IGSDPYLGQR	monophos-(2241)IGSDPYLGQR		207516	230357		520800					248886			121668				3	2	3	2	0.684416	0.403926	0.0106958	0.724174
Q61290	Cacna1e	Voltage-dependent R-type calcium channel subunit alpha-1E	3	FGEAVVVGRPGSGDGDSDQSR	monophos-(3)FGEAVVVGRPGSGDGDSDQSR	199494	453295	744933						729792	955854	488078		508641				3	4	6	1	0.690644	0.318962	#DIV/0!	#DIV/0!
Q61290	Cacna1e	Voltage-dependent R-type calcium channel subunit alpha-1E	853	GGSLKGDIGGLTSALDNQR	monophos-(853)GGSLKGDIGGLTSALDNQR			248517										141118				1	1	1	1	#DIV/0!	#DIV/0!	#DIV/0!	#DIV/0!
Q61290	Cacna1e	Voltage-dependent R-type calcium channel subunit alpha-1E	1046	GISQSEPDLSCMTANMDK	monophos-(1046)GISQSEPDLSCMTANMDK		843248			305474					487971			621615	146477			2	3	2	3	0.521723	0.606105	0.816087	0.262572
Q8R3Z5	Cacnb1	Voltage-dependent L-type calcium channel subunit beta-1	9	GPYPPSQEIPMEVFDPSPQGK	monophos-(9)GPYPPSQEIPMEVFDPSPQGK	95582.2														261415		1	1	1	1	#DIV/0!	#DIV/0!	#DIV/0!	#DIV/0!
Q8R3Z5	Cacnb1	Voltage-dependent L-type calcium channel subunit beta-1	180	LSSSKSGDNSSSSLGDVVTGTR	monophos-(180)LSSSKSGDNSSSSLGDVVTGTR												632904					0	1	1	0	#DIV/0!	#DIV/0!	#DIV/0!	#DIV/0!
Q8R3Z5	Cacnb1	Voltage-dependent L-type calcium channel subunit beta-1	185	SGDNSSSSLGDVVTGTR	monophos-(185)SGDNSSSSLGDVVTGTR	679655	869779	506951	574144		286211		750760	517822	308972	703115		143725	200955	1.12125e+06	286326	6	7	7	6	0.267428	0.397177	0.0852803	0.442678
Q8R3Z5	Cacnb1	Voltage-dependent L-type calcium channel subunit beta-1	410	ATHPPSSTPPNPLLNR	monophos-(410)ATHPPSSTPPNPLLNR	215935																1	0	1	0	#DIV/0!	#DIV/0!	#DIV/0!	#DIV/0!
Q8R3Z5	Cacnb1	Voltage-dependent L-type calcium channel subunit beta-1	492	ALSRQDTFDADTPGSR	diphos-(492)ALSRQDTFDADTPGSR	110949	347579	365976	229650	344128	142332	441501				589320		186547	385928	365223	245575	7	5	5	7	0.592212	0.395537	0.291197	0.751008
Q8R3Z5	Cacnb1	Voltage-dependent L-type calcium channel subunit beta-1	496	QDTFDADTPGSR	monophos-(496)QDTFDADTPGSR	286744	394128		771689	170451					489947					606431	1.5802e+06	4	3	4	3	0.208046	0.19781	0.0737249	0.45391
Q8R3Z5	Cacnb1	Voltage-dependent L-type calcium channel subunit beta-1	508	NSAYTEPGDSCVDMETDPSEGPGPGDPAGGGTPPAR	monophos-(508)NSAYTEPGDSCVDMETDPSEGPGPGDPAGGGTPPAR	176586								270564								1	1	2	0	#DIV/0!	#DIV/0!	#DIV/0!	#DIV/0!
Q8R3Z5	Cacnb1	Voltage-dependent L-type calcium channel subunit beta-1	544	QGSWEDEEDYEEEMTDNR	monophos-(544)QGSWEDEEDYEEEMTDNR		407455	1.07691e+06	551922	94257.1	342109	1.0548e+06	447705		275039	929344			302929	668590	1.06008e+06	7	5	5	7	0.996282	0.716998	0.894886	0.71148
Q8CC27	Cacnb2	Voltage-dependent L-type calcium channel subunit beta-2	66	QGSADSYTSRPSDSDVSLEEDR	diphos-(66)QGSADSYTSRPSDSDVSLEEDR											302187			150964			0	2	1	1	#DIV/0!	#DIV/0!	#DIV/0!	#DIV/0!
Q8CC27	Cacnb2	Voltage-dependent L-type calcium channel subunit beta-2	66	QGSADSYTSRPSDSDVSLEEDR	monophos-(66)QGSADSYTSRPSDSDVSLEEDR	279764	213176	579926			127613		162312	379970	308691	845929			304606	180209	431355	5	6	6	5	0.661096	0.312939	0.240317	0.13743
P54285	Cacnb3	Voltage-dependent L-type calcium channel subunit beta-3	388	VEEHSPLER	monophos-(388)VEEHSPLER												647951		29675.6			0	2	1	1	#DIV/0!	#DIV/0!	#DIV/0!	#DIV/0!
Q8R0S4	Cacnb4	Voltage-dependent L-type calcium channel subunit beta-4	7	NGAADGPHSPSSQVAR	monophos-(7)NGAADGPHSPSSQVAR	25625.4	29850.7				33161.1			92008	171979	322375			61109.5			3	4	5	2	0.00209116	0.108176	0.238535	0.421443
Q8R0S4	Cacnb4	Voltage-dependent L-type calcium channel subunit beta-4	34	SDGSTTSTSFILR	diphos-(34)SDGSTTSTSFILR	1.69317e+06	1.4137e+06	820175	1.09885e+06	562351	2.36329e+06	4.291e+06	1.33396e+06		236498	1.09032e+07		241191	2.96695e+06	3.71799e+06	634884	8	6	6	8	0.00508533	0.443258	0.0250671	0.709498
Q8R0S4	Cacnb4	Voltage-dependent L-type calcium channel subunit beta-4	34	SDGSTTSTSFILR	monophos-(34)SDGSTTSTSFILR	531060	295245			168272	410314	1.48029e+06		458696	503461	974460		246356	258089			5	5	5	5	0.29501	0.749236	0.163407	0.886077
Q8R0S4	Cacnb4	Voltage-dependent L-type calcium channel subunit beta-4	47	QGSADSYTSRPSDSDVSLEEDR	diphos-(47)QGSADSYTSRPSDSDVSLEEDR									123075		302187			150964			0	3	2	1	#DIV/0!	#DIV/0!	#DIV/0!	#DIV/0!
Q8R0S4	Cacnb4	Voltage-dependent L-type calcium channel subunit beta-4	47	QGSADSYTSRPSDSDVSLEEDR	monophos-(47)QGSADSYTSRPSDSDVSLEEDR	279764	213176	579926			127613		162312	379970	308691	845929			304606	180209	431355	5	6	6	5	0.661096	0.312939	0.240317	0.13743
Q8R0S4	Cacnb4	Voltage-dependent L-type calcium channel subunit beta-4	174	SSGNSSSSLGEMVSGTFR	diphos-(174)SSGNSSSSLGEMVSGTFR						126721								147271			1	1	0	2	#DIV/0!	#DIV/0!	#DIV/0!	#DIV/0!
Q8R0S4	Cacnb4	Voltage-dependent L-type calcium channel subunit beta-4	399	ATHTSSSTPMTPLLGR	diphos-(399)ATHTSSSTPMTPLLGR	1.24003e+06	924279	1.80939e+06	865532	2.00503e+06	889857	1.44689e+06	1.63431e+06	1.28255e+06	436616	2.27163e+06	1.69763e+06	1.21177e+06	1.31425e+06	1.1087e+06	4.02513e+06	8	8	8	8	0.0305038	0.463524	0.189855	0.359032
Q8R0S4	Cacnb4	Voltage-dependent L-type calcium channel subunit beta-4	399	ATHTSSSTPMTPLLGR	monophos-(399)ATHTSSSTPMTPLLGR	207696								534542								1	1	2	0	#DIV/0!	#DIV/0!	#DIV/0!	#DIV/0!
Q8R0S4	Cacnb4	Voltage-dependent L-type calcium channel subunit beta-4	438	HSNHSTENSPIERR	diphos-(438)HSNHSTENSPIERR	22727.2													12826.9			1	1	1	1	#DIV/0!	#DIV/0!	#DIV/0!	#DIV/0!
Q8R0S4	Cacnb4	Voltage-dependent L-type calcium channel subunit beta-4	438	HSNHSTENSPIER	monophos-(438)HSNHSTENSPIER			2018.21	40349.9		947267		24214.8	107787		19707.4		13461.7	1351.73	10545.4		4	5	4	5	0.000514094	0.407052	0.00431842	0.450565
Q9JJV5	Cacng3	Voltage-dependent calcium channel gamma-3 subunit	245	DLSPISK	monophos-(245)DLSPISK	461724	704347	1.3248e+06		215417					1.56432e+06			400720	215912			4	3	4	3	0.484812	0.915471	0.0826239	0.0634462
Q8VHW2	Cacng8	Voltage-dependent calcium channel gamma-8 subunit	243	AGGGAGGSGGSGPSAILR	diphos-(243)AGGGAGGSGGSGPSAILR			370943		410125												2	0	1	1	#DIV/0!	#DIV/0!	#DIV/0!	#DIV/0!
Q8BLQ9	Cadm2	Cell adhesion molecule 2	76	IELVRASWHELSISVSDVSLSDEGQYTCSLFTMPVK	monophos-(76)IELVRASWHELSISVSDVSLSDEGQYTCSLFTMPVK			52337.8														1	0	1	0	#DIV/0!	#DIV/0!	#DIV/0!	#DIV/0!
Q8BLQ9	Cadm2	Cell adhesion molecule 2	405	GAEDAPDADTAIINAEGSQVNAEEKK	monophos-(405)GAEDAPDADTAIINAEGSQVNAEEKK	1.39086e+06	1.41214e+06	1.7265e+06		549029	620855	955417	692775	1.67384e+06	1.43467e+06	2.32668e+06		544817	679576		1.58859e+06	7	6	6	7	0.397523	0.322134	0.941161	0.00144469
Q99N28	Cadm3	Cell adhesion molecule 3	366	GSDDAPDADTAIINAEGGQSGGDDKK	monophos-(366)GSDDAPDADTAIINAEGGQSGGDDKK	1.50549e+06	1.59333e+06	1.70993e+06			675900		484328	1.70823e+06	729095	1.75615e+06		357878	804156	1.08718e+06	1.44941e+06	5	7	6	6	0.837118	0.839935	0.937234	0.0129306
Q8R464	Cadm4	Cell adhesion molecule 4	352	GSYLTHEASGLDEQGEAR	monophos-(352)GSYLTHEASGLDEQGEAR	4.55052e+06	5.96318e+06	5.46143e+06		5.86449e+06	1.828e+06	8.40973e+06	5.27865e+06	6.367e+06	3.55534e+06	1.39674e+07	4.4275e+06	4.85046e+06	1.6182e+06	5.01224e+06	1.43761e+06	7	8	7	8	0.10932	0.913671	0.379527	0.210307
Q80TJ1	Cadps	Calcium-dependent secretion activator 1	32	LSPSRTSEGSAGSAGMGGSGAGAGVGAGGGGGSGASSGGGAGGLQPSSR	diphos-(32)LSPSRTSEGSAGSAGMGGSGAGAGVGAGGGGGSGASSGGGAGGLQPSSR	2.56863e+06				1.10169e+06				3.02156e+06	2.78904e+06		805973	320119	1.10621e+06	624078		2	6	4	4	0.826065	0.689923	0.147547	0.0316187
Q80TJ1	Cadps	Calcium-dependent secretion activator 1	37	TSEGSAGSAGMGGSGAGAGVGAGGGGGSGASSGGGAGGLQPSSRAGGGRPSSPSPSVVSEK	diphos-(37)TSEGSAGSAGMGGSGAGAGVGAGGGGGSGASSGGGAGGLQPSSRAGGGRPSSPSPSVVSEK															316396		0	1	0	1	#DIV/0!	#DIV/0!	#DIV/0!	#DIV/0!
Q80TJ1	Cadps	Calcium-dependent secretion activator 1	81	AGGGRPSSPSPSVVSEK	monophos-(81)AGGGRPSSPSPSVVSEK			690932														1	0	1	0	#DIV/0!	#DIV/0!	#DIV/0!	#DIV/0!
Q80TJ1	Cadps	Calcium-dependent secretion activator 1	218	SLPEIDGLSK	monophos-(218)SLPEIDGLSK										152779							0	1	1	0	#DIV/0!	#DIV/0!	#DIV/0!	#DIV/0!
Q80TJ1	Cadps	Calcium-dependent secretion activator 1	370	SHNASIIDMGEESENQLSK	monophos-(370)SHNASIIDMGEESENQLSK	205731	862251	612310			143232			266201	427192	246663			187942		295441	4	5	6	3	0.0249608	0.394406	0.173793	0.188695
Q80TJ1	Cadps	Calcium-dependent secretion activator 1	1323	LTVEEATASVSEGGGLQGISMKDSDEEDEEDD	monophos-(1323)LTVEEATASVSEGGGLQGISMKDSDEEDEEDD		149175	1.26487e+07	3.26487e+06	5.69846e+06	805051	1.79548e+06	750097	2.79766e+06	1.26178e+06	6.08748e+06	194592	2.87274e+06	718774	451050	2.57578e+06	7	8	7	8	0.0470954	0.440258	0.0290288	0.340866
Q8BYR5	Cadps2	Calcium-dependent secretion activator 2	189	SLPEIDGLSK	monophos-(189)SLPEIDGLSK										152779							0	1	1	0	#DIV/0!	#DIV/0!	#DIV/0!	#DIV/0!
Q8CGU1	Calcoco1	Calcium-binding and coiled-coil domain-containing protein 1	548	LPSYGLCESGNTSSSPPGPR	monophos-(548)LPSYGLCESGNTSSSPPGPR	170265								252572								1	1	2	0	#DIV/0!	#DIV/0!	#DIV/0!	#DIV/0!
Q91YS8	Camk1	Calcium/calmodulin-dependent protein kinase type 1	167	MEDPGSVLSTACGTPGYVAPEVLAQKPYSK	monophos-(167)MEDPGSVLSTACGTPGYVAPEVLAQKPYSK					83043.9								100771				1	1	0	2	#DIV/0!	#DIV/0!	#DIV/0!	#DIV/0!
Q91YS8	Camk1	Calcium/calmodulin-dependent protein kinase type 1	317	KLQLGTSQEGQGQTGSHGELLTPTAGGPAAGCCCR	monophos-(317)KLQLGTSQEGQGQTGSHGELLTPTAGGPAAGCCCR			221589														1	0	1	0	#DIV/0!	#DIV/0!	#DIV/0!	#DIV/0!
Q8BW96	Camk1d	Calcium/calmodulin-dependent protein kinase type 1D	174	GDVMSTACGTPGYVAPEVLAQKPYSK	monophos-(174)GDVMSTACGTPGYVAPEVLAQKPYSK	116213		1.13428e+06		2.00238e+06	301640		198150	660582		979199		556076		235038	459663	5	5	4	6	0.0588255	0.663967	0.515087	0.811414
P11798	Camk2a	Calcium/calmodulin-dependent protein kinase type II subunit alpha	226	AGAYDFPSPEWDTVTPEAK	monophos-(226)AGAYDFPSPEWDTVTPEAK	255367	434582	1.17297e+06	220855	5.00438e+06	220737	831175	760707	591648	454143	1.7774e+06	725529	243889	364453	550868	1.29645e+06	8	8	8	8	0.00823072	0.561007	0.00931622	0.46421
P11798	Camk2a	Calcium/calmodulin-dependent protein kinase type II subunit alpha	267	HPWISHR	monophos-(267)HPWISHR		1.05229e+06			408901				257668								2	1	2	1	#DIV/0!	#DIV/0!	#DIV/0!	#DIV/0!
P11798	Camk2a	Calcium/calmodulin-dependent protein kinase type II subunit alpha	274	STVASCMHR	diphos-(274)STVASCMHR	126665								785075		588134			144513		594064	1	4	3	2	#DIV/0!	#DIV/0!	0.892379	0.694948
P11798	Camk2a	Calcium/calmodulin-dependent protein kinase type II subunit alpha	274	STVASCMHR	monophos-(274)STVASCMHR	647194	985294	116310	371554	698830	918183			1.20065e+06	948254	6.65542e+06	1.27453e+06	483496	1.96825e+06		1.2467e+06	6	7	8	5	0.00085665	0.145221	0.0250113	0.573945
P11798	Camk2a	Calcium/calmodulin-dependent protein kinase type II subunit alpha	283	QETVDCLKK	monophos-(283)QETVDCLKK	9.31424e+06	1.07019e+07	3.45777e+07	5.39847e+06	4.63121e+06	6.47389e+06	7.1745e+06	6.6982e+06	7.91341e+06	4.54844e+06	3.98466e+07	4.86069e+06	1.47884e+06	8.56367e+06	4.57624e+06	1.49422e+07	8	8	8	8	0.565132	0.969228	0.00310604	0.170128
P11798	Camk2a	Calcium/calmodulin-dependent protein kinase type II subunit alpha	323	NDGVKESSESTNTTIEDEDTK	diphos-(323)NDGVKESSESTNTTIEDEDTK	1.43267e+06	2.17662e+07	1.53234e+07	8.49176e+06	1.00316e+07	3.37284e+06	1.22482e+06	6.56022e+06	2.89062e+06	4.29634e+06	4.81882e+07	4.82147e+06	5.17356e+06	1.48498e+07	5.49076e+06	3.59297e+07	8	8	8	8	0.0329107	0.337927	0.390397	0.658344
P11798	Camk2a	Calcium/calmodulin-dependent protein kinase type II subunit alpha	323	NDGVKESSESTNTTIEDEDTK	monophos-(323)NDGVKESSESTNTTIEDEDTK	8.13164e+06	1.32122e+07	4.0093e+07	5.48893e+06	1.60282e+07	4.09489e+06	1.02e+07	8.78125e+06	1.0297e+07	3.89121e+06	1.94736e+07	7.49351e+06	3.98256e+06	4.03815e+06	3.77684e+06	1.66087e+07	8	8	8	8	0.129962	0.341796	0.0585477	0.288279
P11798	Camk2a	Calcium/calmodulin-dependent protein kinase type II subunit alpha	328	ESSESTNTTIEDEDTK	diphos-(328)ESSESTNTTIEDEDTK			1.99299e+06	6.68342e+06			930465	3.02759e+06			744641	1.03512e+06		86876.2		921729	4	4	4	4	0.0157229	0.142595	0.226897	0.400828
P11798	Camk2a	Calcium/calmodulin-dependent protein kinase type II subunit alpha	396	FYFENLWSR	monophos-(396)FYFENLWSR		12501.4	194746	108004	179740		206469	126837			231559	293580	41661.2		127655	278459	6	5	5	6	0.415347	0.325356	0.5164	0.89312
P28652	Camk2b	Calcium/calmodulin-dependent protein kinase type II subunit beta	227	AGAYDFPSPEWDTVTPEAK	monophos-(227)AGAYDFPSPEWDTVTPEAK	255367	434582	1.17297e+06	220855	5.00438e+06	220737	831175	760707	591648	454143	1.7774e+06	725529	243889	364453	550868	1.29645e+06	8	8	8	8	0.00823072	0.561007	0.00931622	0.46421
P28652	Camk2b	Calcium/calmodulin-dependent protein kinase type II subunit beta	275	STVASMMHR	diphos-(275)STVASMMHR	238403	163568	1.6464e+06	625592	114836	238546	1.60783e+06	795587	1.20885e+06		1.2694e+06	1.14817e+06		350293	463912	1.25864e+06	8	6	7	7	0.398839	0.383056	0.986215	0.497286
P28652	Camk2b	Calcium/calmodulin-dependent protein kinase type II subunit beta	275	STVASMMHR	monophos-(275)STVASMMHR	180942		2.06847e+06	159475	145593		1.26203e+06	346262	891075	317326	1.15993e+06	500337	69819.7	382412	797269	527504	6	8	7	7	0.0522394	0.724464	0.235995	0.426872
P28652	Camk2b	Calcium/calmodulin-dependent protein kinase type II subunit beta	284	QETVECLKK	monophos-(284)QETVECLKK	1.61045e+06	2.35993e+06	4.89511e+06		642403	375964	3.77138e+06	2.0368e+06	1.75007e+06	1.22075e+06	8.07188e+06		351019	1.48187e+06	1.36358e+06	4.28771e+06	7	7	6	8	0.248068	0.738728	0.166457	0.197422
P28652	Camk2b	Calcium/calmodulin-dependent protein kinase type II subunit beta	318	QTTAPATMSTAASGTTMGLVEQAK	monophos-(318)QTTAPATMSTAASGTTMGLVEQAK	91145.3	205806	479861		144830		131479		216841	111998	332822			110742			5	4	6	3	0.547182	0.853884	0.0274647	0.1231
P28652	Camk2b	Calcium/calmodulin-dependent protein kinase type II subunit beta	360	NSSAITSPKGSLPPAALEPQTTVIHNPVDGIK	diphos-(360)NSSAITSPKGSLPPAALEPQTTVIHNPVDGIK					134548		271059						207883				2	1	0	3	#DIV/0!	#DIV/0!	#DIV/0!	#DIV/0!
P28652	Camk2b	Calcium/calmodulin-dependent protein kinase type II subunit beta	369	GSLPPAALEPQTTVIHNPVDGIKESSDSTNTTIEDEDAK	diphos-(369)GSLPPAALEPQTTVIHNPVDGIKESSDSTNTTIEDEDAK				742209	4.59203e+06			1.50598e+06				1.16793e+06	1.18369e+06	626120		1.35682e+06	3	4	2	5	0.0130762	0.416546	0.285965	0.480353
P28652	Camk2b	Calcium/calmodulin-dependent protein kinase type II subunit beta	369	GSLPPAALEPQTTVIHNPVDGIK	monophos-(369)GSLPPAALEPQTTVIHNPVDGIK		516062	1.32892e+06		896880	435662	1.6744e+06	1.3806e+06					260636	407574	707619	1.11806e+06	6	4	2	8	0.680208	0.199403	0.581063	0.881537
P28652	Camk2b	Calcium/calmodulin-dependent protein kinase type II subunit beta	392	ESSDSTNTTIEDEDAK	monophos-(392)ESSDSTNTTIEDEDAK	355124	1.32501e+06	7.15316e+06	969882	131629			1.08583e+06	845897	717568	295292	1.32754e+06		102574	145234	2.19452e+06	6	7	8	5	0.00826438	0.392361	0.0995711	0.425772
P28652	Camk2b	Calcium/calmodulin-dependent protein kinase type II subunit beta	469	NSKPIHTTILNPHVHVIGEDAACIAYIR	diphos-(469)NSKPIHTTILNPHVHVIGEDAACIAYIR					605801												1	0	0	1	#DIV/0!	#DIV/0!	#DIV/0!	#DIV/0!
Q6PHZ2	Camk2d	Calcium/calmodulin-dependent protein kinase type II subunit delta	227	AGAYDFPSPEWDTVTPEAK	monophos-(227)AGAYDFPSPEWDTVTPEAK	255367	434582	1.17297e+06	220855	5.00438e+06	220737	831175	760707	591648	454143	1.7774e+06	725529	243889	364453	550868	1.29645e+06	8	8	8	8	0.00823072	0.561007	0.00931622	0.46421
Q6PHZ2	Camk2d	Calcium/calmodulin-dependent protein kinase type II subunit delta	275	STVASMMHR	diphos-(275)STVASMMHR	238403	163568	1.6464e+06	625592	114836	238546	1.60783e+06	795587	1.20885e+06		1.2694e+06	1.14817e+06		350293	463912	1.25864e+06	8	6	7	7	0.398839	0.383056	0.986215	0.497286
Q6PHZ2	Camk2d	Calcium/calmodulin-dependent protein kinase type II subunit delta	275	STVASMMHR	monophos-(275)STVASMMHR	180942		2.06847e+06	159475	145593		1.26203e+06	346262	891075	317326	1.15993e+06	500337	69819.7	382412	797269	527504	6	8	7	7	0.0522394	0.724464	0.235995	0.426872
Q6PHZ2	Camk2d	Calcium/calmodulin-dependent protein kinase type II subunit delta	284	QETVDCLKK	monophos-(284)QETVDCLKK	9.31424e+06	1.07019e+07	3.45777e+07	5.39847e+06	4.63121e+06	6.47389e+06	7.1745e+06	6.6982e+06	7.91341e+06	4.54844e+06	3.98466e+07	4.86069e+06	1.47884e+06	8.56367e+06	4.57624e+06	1.49422e+07	8	8	8	8	0.565132	0.969228	0.00310604	0.170128
Q6PHZ2	Camk2d	Calcium/calmodulin-dependent protein kinase type II subunit delta	312	NFSAAKSLLK	diphos-(312)NFSAAKSLLK	327720	94913.2	768690		85719.8			540705	93658.3		567863					619947	5	3	5	3	0.905882	0.776135	0.922598	0.841243
Q6PHZ2	Camk2d	Calcium/calmodulin-dependent protein kinase type II subunit delta	322	KPDGVKESTESSNTTIEDEDVK	monophos-(322)KPDGVKESTESSNTTIEDEDVK			607940								272124						1	1	2	0	#DIV/0!	#DIV/0!	#DIV/0!	#DIV/0!
Q923T9	Camk2g	Calcium/calmodulin-dependent protein kinase type II subunit gamma	227	AGAYDFPSPEWDTVTPEAK	monophos-(227)AGAYDFPSPEWDTVTPEAK	255367	434582	1.17297e+06	220855	5.00438e+06	220737	831175	760707	591648	454143	1.7774e+06	725529	243889	364453	550868	1.29645e+06	8	8	8	8	0.00823072	0.561007	0.00931622	0.46421
Q923T9	Camk2g	Calcium/calmodulin-dependent protein kinase type II subunit gamma	275	STVASMMHR	diphos-(275)STVASMMHR	238403	163568	1.6464e+06	625592	114836	238546	1.60783e+06	795587	1.20885e+06		1.2694e+06	1.14817e+06		350293	463912	1.25864e+06	8	6	7	7	0.398839	0.383056	0.986215	0.497286
Q923T9	Camk2g	Calcium/calmodulin-dependent protein kinase type II subunit gamma	275	STVASMMHR	monophos-(275)STVASMMHR	180942		2.06847e+06	159475	145593		1.26203e+06	346262	891075	317326	1.15993e+06	500337	69819.7	382412	797269	527504	6	8	7	7	0.0522394	0.724464	0.235995	0.426872
Q923T9	Camk2g	Calcium/calmodulin-dependent protein kinase type II subunit gamma	284	QETVECLRK	monophos-(284)QETVECLRK	2.18517e+06	3.48123e+06	3.71434e+06	987948	1.27983e+06	820002	3.61749e+06	2.95355e+06	2.15483e+06	2.3187e+06	3.58425e+06	1.19263e+06	480517	1.03511e+06	2.90246e+06	3.10298e+06	8	8	8	8	0.788148	0.633602	0.691846	0.46892
Q923T9	Camk2g	Calcium/calmodulin-dependent protein kinase type II subunit gamma	333	SSSSVHLMPQSNNK	monophos-(333)SSSSVHLMPQSNNK					174549												1	0	0	1	#DIV/0!	#DIV/0!	#DIV/0!	#DIV/0!
Q923T9	Camk2g	Calcium/calmodulin-dependent protein kinase type II subunit gamma	456	NSKPIHTTILNPHVHVIGEDAACIAYIR	diphos-(456)NSKPIHTTILNPHVHVIGEDAACIAYIR					605801												1	0	0	1	#DIV/0!	#DIV/0!	#DIV/0!	#DIV/0!
P08414	Camk4	Calcium/calmodulin-dependent protein kinase type IV	195	TVCGTPGYCAPEILR	monophos-(195)TVCGTPGYCAPEILR	704479	286240			841612	644264	490178	377382	873674	322054			244716	495491	252379	498417	6	6	4	8	0.795035	0.41672	0.373803	0.648279
P08414	Camk4	Calcium/calmodulin-dependent protein kinase type IV	350	ASSDPPSTQDAK	monophos-(350)ASSDPPSTQDAK														219387			0	1	0	1	#DIV/0!	#DIV/0!	#DIV/0!	#DIV/0!
P08414	Camk4	Calcium/calmodulin-dependent protein kinase type IV	436	LKSVEEEMDPMTEEEAPDAGLGVPQQDAIQPEY	monophos-(436)LKSVEEEMDPMTEEEAPDAGLGVPQQDAIQPEY	1.2506e+06				66884.3		123526								6.91581e+06		3	1	1	3	#DIV/0!	#DIV/0!	#DIV/0!	#DIV/0!
Q8VBY2	Camkk1	Calcium/calmodulin-dependent protein kinase kinase 1	457	SFGNPFEPQAR	monophos-(457)SFGNPFEPQAR	1.12195e+06	1.02136e+06	1.04509e+06	1.52186e+06	1.22668e+06	708973	5.69178e+06	2.26066e+06	1.46849e+06	1417350	1.63804e+06	2.51851e+06	518675	600544	3.02383e+06	2.93863e+06	8	8	8	8	0.199392	0.930897	0.00286088	0.344019
Q8VBY2	Camkk1	Calcium/calmodulin-dependent protein kinase kinase 1	472	SMSAPGSLLMK	monophos-(472)SMSAPGSLLMK	210276	224997	395538	285161	132398	173471	1.07015e+06	462075	311682	245376	355852	585731	58790.6	159282	615131		8	7	8	7	0.367755	0.795504	0.011184	0.714915
Q8VBY2	Camkk1	Calcium/calmodulin-dependent protein kinase kinase 1	483	EGCGEGCKSPELPGVQEDEAAS	monophos-(483)EGCGEGCKSPELPGVQEDEAAS	159441				134393						1.47069e+06						2	1	2	1	#DIV/0!	#DIV/0!	#DIV/0!	#DIV/0!
Q8C078	Camkk2	Calcium/calmodulin-dependent protein kinase kinase 2	69	DQPPEADGQELPLEASDPESR	monophos-(69)DQPPEADGQELPLEASDPESR			589207				329884							296117	454583		2	2	1	3	0.6984	0.635202	#DIV/0!	#DIV/0!
Q8C078	Camkk2	Calcium/calmodulin-dependent protein kinase kinase 2	96	KMSLQEPSQGGPASSSNSLDMNGR	monophos-(96)KMSLQEPSQGGPASSSNSLDMNGR			193641						1.08371e+06		215737						1	2	3	0	#DIV/0!	#DIV/0!	#DIV/0!	#DIV/0!
Q8C078	Camkk2	Calcium/calmodulin-dependent protein kinase kinase 2	494	SFGNPFEGSR	monophos-(494)SFGNPFEGSR	456173	365957	513925		191707	245835	1.65465e+06	604869	774862	656842	846338	951541	195822	204213	991295	975756	7	8	7	8	0.300676	0.575129	0.0422149	0.927769
Q8C078	Camkk2	Calcium/calmodulin-dependent protein kinase kinase 2	508	SLSAPGNLLTK	monophos-(508)SLSAPGNLLTK	178811	174644	285367	280540	96313.9	115768	694693	351136	283516	244077	317043	366565	111385	97245.2	414393	471916	8	8	8	8	0.365282	0.848746	0.00430557	0.74531
Q8C078	Camkk2	Calcium/calmodulin-dependent protein kinase kinase 2	557	GGPCVESWGAPAPGSPPR	monophos-(557)GGPCVESWGAPAPGSPPR	868617	895609	871195		229165	391685	205038		1.33381e+06	1.41027e+06	2.22494e+06		173928	556069	511404	307982	6	7	6	7	0.101326	0.308371	0.00858048	0.00664292
Q3UHL1	Camkv	CaM kinase-like vesicle-associated protein	395	SATPATDGSATPATDGSVTPATDGSITPATDGSVTPATDR	monophos-(395)SATPATDGSATPATDGSVTPATDGSITPATDGSVTPATDR	834561	799863							1.40923e+06	1.22046e+06							2	2	4	0	0.231448	0.0352359	#DIV/0!	#DIV/0!
Q3UHL1	Camkv	CaM kinase-like vesicle-associated protein	435	SATPATDGRATPATEESTVPATQSSALPAAK	diphos-(435)SATPATDGRATPATEESTVPATQSSALPAAK	4.75891e+06	3.9258e+06	1.05439e+07	455549	2.32326e+07	1.57552e+06	7.08866e+06	1.64261e+06	1.36204e+07	3.8303e+06	3.2136e+06	3.61224e+06	3.70074e+06	2.7389e+06	895093	1.17367e+06	8	8	8	8	0.122948	0.408357	0.167435	0.939088
Q3UHL1	Camkv	CaM kinase-like vesicle-associated protein	435	SATPATDGRATPATEESTVPATQSSALPAAK	monophos-(435)SATPATDGRATPATEESTVPATQSSALPAAK	1.43664e+06	657466	711410		857334				2.71686e+06	1.7891e+06	1.0472e+06	318341	412376	142746	357343	374638	4	8	7	5	0.151425	0.966346	0.0446052	0.0415013
Q3UHL1	Camkv	CaM kinase-like vesicle-associated protein	444	ATPATEESTVPATQSSALPAAK	monophos-(444)ATPATEESTVPATQSSALPAAK	209319	484050	552034				211027		827858	538684	216859				204864		4	4	6	2	0.431409	0.649877	0.0283808	0.0393947
Q3UHL1	Camkv	CaM kinase-like vesicle-associated protein	466	AAATPEPAVAQPDSTALEGATGQAPPSSKGEEATGCAQESQR	diphos-(466)AAATPEPAVAQPDSTALEGATGQAPPSSKGEEATGCAQESQR									370317								0	1	1	0	#DIV/0!	#DIV/0!	#DIV/0!	#DIV/0!
A2AHC3	Camsap1	Calmodulin-regulated spectrin-associated protein 1	139	MSGHMAMVDALMMAYTVEMISIEK	diphos-(139)MSGHMAMVDALMMAYTVEMISIEK									1.00424e+07								0	1	1	0	#DIV/0!	#DIV/0!	#DIV/0!	#DIV/0!
A2AHC3	Camsap1	Calmodulin-regulated spectrin-associated protein 1	464	NRPVSQPTSFALHHAASCDVDPSSGDSVSLAR	monophos-(464)NRPVSQPTSFALHHAASCDVDPSSGDSVSLAR			351450														1	0	1	0	#DIV/0!	#DIV/0!	#DIV/0!	#DIV/0!
A2AHC3	Camsap1	Calmodulin-regulated spectrin-associated protein 1	546	TDVSPPSPQMPR	diphos-(546)TDVSPPSPQMPR					654485		1.48501e+06							377544	137502		2	2	0	4	0.358233	0.201011	#DIV/0!	#DIV/0!
A2AHC3	Camsap1	Calmodulin-regulated spectrin-associated protein 1	731	QDSDSDVVDVEDTEQDFIGEDHPVVIPR	diphos-(731)QDSDSDVVDVEDTEQDFIGEDHPVVIPR			818045	331443			444861	426579		167277	418478	331751	223196	145053	429159	318238	4	7	5	6	0.17982	0.0546492	0.175252	0.486974
A2AHC3	Camsap1	Calmodulin-regulated spectrin-associated protein 1	731	QDSDSDVVDVEDTEQDFIGEDHPVVIPR	monophos-(731)QDSDSDVVDVEDTEQDFIGEDHPVVIPR	102163	192285	677330	246265		93209.5	215167	233295	261202	279501	339766		498123	156513	204542	525253	7	7	7	7	0.433142	0.446547	0.849692	0.797264
A2AHC3	Camsap1	Calmodulin-regulated spectrin-associated protein 1	1132	SPSDPGGELPEK	monophos-(1132)SPSDPGGELPEK							588868							40872.9			1	1	0	2	#DIV/0!	#DIV/0!	#DIV/0!	#DIV/0!
A2AHC3	Camsap1	Calmodulin-regulated spectrin-associated protein 1	1404	VESLEALPILSR	monophos-(1404)VESLEALPILSR															116610		0	1	0	1	#DIV/0!	#DIV/0!	#DIV/0!	#DIV/0!
Q8C1B1	Camsap2	Calmodulin-regulated spectrin-associated protein 2	388	SSSMSYVDGFIGTWPK	diphos-(388)SSSMSYVDGFIGTWPK						67764.9								117926			1	1	0	2	#DIV/0!	#DIV/0!	#DIV/0!	#DIV/0!
Q8C1B1	Camsap2	Calmodulin-regulated spectrin-associated protein 2	388	SSSMSYVDGFIGTWPK	monophos-(388)SSSMSYVDGFIGTWPK			242116	297516		100909		181428			265572						4	1	3	2	#DIV/0!	#DIV/0!	0.354393	0.0398048
Q8C1B1	Camsap2	Calmodulin-regulated spectrin-associated protein 2	436	SVSNEGLTLNNSR	monophos-(436)SVSNEGLTLNNSR	682263	2.56211e+06	1.10097e+06	502493	2.52589e+06	345382	477159	1.00516e+06	1.23792e+06	849303	1.09124e+06		342055	1.15214e+06	835878	1.37127e+06	8	7	7	8	0.0319331	0.637058	0.886031	0.706292
Q8C1B1	Camsap2	Calmodulin-regulated spectrin-associated protein 2	568	LNQSSPDNLTDTK	monophos-(568)LNQSSPDNLTDTK			352866		433235	247824	557678	275789			575975		148906	286008			5	3	2	6	0.319184	0.76865	0.65921	0.292566
Q8C1B1	Camsap2	Calmodulin-regulated spectrin-associated protein 2	581	GALSPITDTTEVDTGIHVPSEDIPETMDEDSSLR	monophos-(581)GALSPITDTTEVDTGIHVPSEDIPETMDEDSSLR	40815.7																1	0	1	0	#DIV/0!	#DIV/0!	#DIV/0!	#DIV/0!
Q8C1B1	Camsap2	Calmodulin-regulated spectrin-associated protein 2	832	WLKSPTTPVDPER	diphos-(832)WLKSPTTPVDPER							293945										1	0	0	1	#DIV/0!	#DIV/0!	#DIV/0!	#DIV/0!
Q8C1B1	Camsap2	Calmodulin-regulated spectrin-associated protein 2	989	RFSPSQVPIQTR	monophos-(989)RFSPSQVPIQTR				132748													1	0	1	0	#DIV/0!	#DIV/0!	#DIV/0!	#DIV/0!
Q8C1B1	Camsap2	Calmodulin-regulated spectrin-associated protein 2	1282	SESVEGFLSPSR	diphos-(1282)SESVEGFLSPSR		112611		842912	198848	443319	1.12819e+06	528549						160440	763524	226541	6	3	2	7	0.94842	0.564119	0.38808	0.962162
Q8C1B1	Camsap2	Calmodulin-regulated spectrin-associated protein 2	1282	SESVEGFLSPSR	monophos-(1282)SESVEGFLSPSR	118983	510398		1.81527e+06		231997	993553							428000	1.77673e+06	391011	5	3	3	5	0.734162	0.812832	0.511216	0.927365
Q80VC9	Camsap3	Calmodulin-regulated spectrin-associated protein 3	325	DLPDGHAVSPR	monophos-(325)DLPDGHAVSPR					240484									207623			1	1	0	2	#DIV/0!	#DIV/0!	#DIV/0!	#DIV/0!
Q80VC9	Camsap3	Calmodulin-regulated spectrin-associated protein 3	428	SVSSDSLGPPRPVSTSSR	monophos-(428)SVSSDSLGPPRPVSTSSR	174944		324632								356541						2	1	3	0	#DIV/0!	#DIV/0!	#DIV/0!	#DIV/0!
Q80VC9	Camsap3	Calmodulin-regulated spectrin-associated protein 3	577	AEAESGLGSPTSTPVAPEALSSEMSELGAR	monophos-(577)AEAESGLGSPTSTPVAPEALSSEMSELGAR	104873								291942	355573			2.4332e+06	106546			1	4	3	2	#DIV/0!	#DIV/0!	0.0124317	0.541696
Q80VC9	Camsap3	Calmodulin-regulated spectrin-associated protein 3	809	KFSPSQVPVQTR	monophos-(809)KFSPSQVPVQTR			253250						453833	401399	480537		169977	160531			1	5	4	2	#DIV/0!	#DIV/0!	0.0966779	0.0381702
Q6ZQ38	Cand1	Cullin-associated NEDD8-dissociated protein 1	548	VIRPLDQPSSFDATPYIK	monophos-(548)VIRPLDQPSSFDATPYIK								137201			136538					256938	1	2	1	2	#DIV/0!	#DIV/0!	#DIV/0!	#DIV/0!
Q6ZQ38	Cand1	Cullin-associated NEDD8-dissociated protein 1	1217	DSSSTNLESMDTS	monophos-(1217)DSSSTNLESMDTS											703286						0	1	1	0	#DIV/0!	#DIV/0!	#DIV/0!	#DIV/0!
P35564	Canx	Calnexin	550	QKSDAEEDGVTGSQDEEDSKPK	diphos-(550)QKSDAEEDGVTGSQDEEDSKPK	1.34325e+07	1.16724e+07	5.20339e+07	5.5065e+06	2.21746e+06	1.48585e+06	1.67337e+07	3.56854e+06	1.28124e+07	8.87559e+06	4.45713e+06	3.25191e+06	198903	1.00878e+06	1.72947e+06	1.6819e+07	8	8	8	8	0.0164965	0.280675	0.0482797	0.195208
P35564	Canx	Calnexin	550	QKSDAEEDGVTGSQDEEDSKPK	monophos-(550)QKSDAEEDGVTGSQDEEDSKPK	1.21582e+06	1.64719e+06	8.44025e+06	1.61286e+06	76661.6		3.61424e+06	606368	4.11902e+06	268368	1.23824e+06	920288	327781	474294	70770	9.26187e+06	7	8	8	7	0.813447	0.815639	0.538244	0.817063
P35564	Canx	Calnexin	552	SDAEEDGVTGSQDEEDSKPK	monophos-(552)SDAEEDGVTGSQDEEDSKPK	157646	162029	583727	298516					310420	274962						706646	4	3	6	1	0.729528	0.467004	#DIV/0!	#DIV/0!
P35564	Canx	Calnexin	572	AEEDEILNRSPR	monophos-(572)AEEDEILNRSPR	1.36499e+07	1.69065e+07	2.0325e+07	2.04648e+07	9.5649e+06	8.03778e+06	2.47758e+07	2.29905e+07	2.41008e+07	2.56774e+07	2.73624e+07	1.91728e+07	6.24393e+06	7.83467e+06	3.16201e+07	2.91275e+07	8	8	8	8	0.266573	0.303871	0.041056	0.421923
P40124	Cap1	Adenylyl cyclase-associated protein 1	17	LEAVSHTSDMHCGYGDSPSK	monophos-(17)LEAVSHTSDMHCGYGDSPSK		2.92522e+06	2.22141e+06		522403				2.54315e+06	813083	1.33078e+06		606855				3	4	5	2	0.555405	0.504254	0.102461	0.0848849
P40124	Cap1	Adenylyl cyclase-associated protein 1	293	SGPKPFSAPKPQTSPSPKPATK	monophos-(293)SGPKPFSAPKPQTSPSPKPATK					201429					196355							1	1	1	1	#DIV/0!	#DIV/0!	#DIV/0!	#DIV/0!
Q9CYT6	Cap2	Adenylyl cyclase-associated protein 2	260	SALFAQLNQGEAITK	monophos-(260)SALFAQLNQGEAITK		100090			233095					105248			92051.8				2	2	2	2	0.125915	0.416289	0.0465423	0.551614
Q9CYT6	Cap2	Adenylyl cyclase-associated protein 2	293	AQGQIRSPTK	monophos-(293)AQGQIRSPTK		16841.6			207981				9692.91				95303.7	24162.8			2	3	2	3	0.196598	0.444599	0.0770689	0.259572
Q9CYT6	Cap2	Adenylyl cyclase-associated protein 2	299	SPTKTHTPSPTSPK	diphos-(299)SPTKTHTPSPTSPK		50710.9			452417				43004.5				418291				2	2	2	2	0.956724	0.94627	0.282783	0.00202124
Q9CYT6	Cap2	Adenylyl cyclase-associated protein 2	303	THTPSPTSPKSNSPQK	diphos-(303)THTPSPTSPKSNSPQK	124064	401873	2.48279e+06	189801	1.19888e+06	62748.4			357105	391345	273339		1.76377e+06	454733			6	5	7	4	0.442337	0.85235	0.948928	0.611917
Q9CYT6	Cap2	Adenylyl cyclase-associated protein 2	303	THTPSPTSPK	monophos-(303)THTPSPTSPK				344484						306537			106396	233693			1	3	2	2	#DIV/0!	#DIV/0!	0.368866	0.144084
Q9CYT6	Cap2	Adenylyl cyclase-associated protein 2	313	SNSPQKHTPVLELEGK	monophos-(313)SNSPQKHTPVLELEGK					216237												1	0	0	1	#DIV/0!	#DIV/0!	#DIV/0!	#DIV/0!
P47757	Capzb	F-actin-capping protein subunit beta	260	ELSQVLTQR	monophos-(260)ELSQVLTQR	222611	245578	357431	744734	278156			574906	192409	119700	584514	1.35144e+06			728025	518383	6	6	8	4	0.127477	0.393874	0.221023	0.83337
Q9CR86	Carhsp1	Calcium-regulated heat stable protein 1	28	DRSPSPLR	monophos-(28)DRSPSPLR											399669						0	1	1	0	#DIV/0!	#DIV/0!	#DIV/0!	#DIV/0!
Q9CR86	Carhsp1	Calcium-regulated heat stable protein 1	36	GNVVPSPLPTRR	monophos-(36)GNVVPSPLPTRR	227837	262494		592425	282582		1.36325e+06	315056	226483		559662		136320		316873	665962	6	5	5	6	0.21652	0.576793	0.109637	0.536327
Q9CR86	Carhsp1	Calcium-regulated heat stable protein 1	50	TFSATVR	monophos-(50)TFSATVR	182248				201788			572401	142009		719230		39708.2			607501	3	4	3	4	0.626836	0.806305	0.770919	0.974851
Q8K3W3	Casc3	Protein CASC3	136	GTVTGERQSGDGQESTEPVENK	monophos-(136)GTVTGERQSGDGQESTEPVENK			118275								128449						1	1	2	0	#DIV/0!	#DIV/0!	#DIV/0!	#DIV/0!
Q6P9K8	Caskin1	Caskin-1	352	TGSEPSPPQGGGSLGPSAPPEEIWVLR	diphos-(352)TGSEPSPPQGGGSLGPSAPPEEIWVLR														322446			0	1	0	1	#DIV/0!	#DIV/0!	#DIV/0!	#DIV/0!
Q6P9K8	Caskin1	Caskin-1	352	TGSEPSPPQGGGSLGPSAPPEEIWVLR	monophos-(352)TGSEPSPPQGGGSLGPSAPPEEIWVLR	177091	321854	723015	387593		201925	423509	250359	379274	306685	365612			403368	268315	503437	7	6	7	6	0.0907132	0.849091	0.463772	0.648401
Q6P9K8	Caskin1	Caskin-1	387	SGSLSNVAGGR	monophos-(387)SGSLSNVAGGR							470674	255568	691222		447431			567539			2	3	2	3	0.676796	0.188284	0.78642	0.424487
Q6P9K8	Caskin1	Caskin-1	422	SVSESSPGDSPVKPPEGSSGAAR	diphos-(422)SVSESSPGDSPVKPPEGSSGAAR											560813						0	1	1	0	#DIV/0!	#DIV/0!	#DIV/0!	#DIV/0!
Q6P9K8	Caskin1	Caskin-1	422	SVSESSPGDSPVKPPEGSSGAAR	monophos-(422)SVSESSPGDSPVKPPEGSSGAAR	707583		753052			283684			1.0641e+06		2.36049e+06			292072			3	3	4	2	0.115585	0.349916	0.0112397	0.0953214
Q6P9K8	Caskin1	Caskin-1	624	KTPQSLEMMAIESPPPSEPAAAECQSPK	monophos-(624)KTPQSLEMMAIESPPPSEPAAAECQSPK	1.23444e+06	1.06205e+06	1.63396e+06	215874		874948	273667	526533	1.76452e+06	1.70956e+06	1.35984e+06	1.03994e+06		1.02393e+06		1.24483e+06	7	6	8	5	0.301686	0.0563913	0.641962	0.108746
Q6P9K8	Caskin1	Caskin-1	625	TPQSLEMMAIESPPPSEPAAAECQSPK	diphos-(625)TPQSLEMMAIESPPPSEPAAAECQSPK														172411			0	1	0	1	#DIV/0!	#DIV/0!	#DIV/0!	#DIV/0!
Q6P9K8	Caskin1	Caskin-1	705	HISSSQELLGDGPPGPGSPMSR	diphos-(705)HISSSQELLGDGPPGPGSPMSR						140639											1	0	0	1	#DIV/0!	#DIV/0!	#DIV/0!	#DIV/0!
Q6P9K8	Caskin1	Caskin-1	705	HISSSQELLGDGPPGPGSPMSR	monophos-(705)HISSSQELLGDGPPGPGSPMSR	161389	162625	257572	1.15315e+06		246312					321224			166720		219393	5	3	5	3	0.0664329	0.553794	0.0184336	0.348026
Q6P9K8	Caskin1	Caskin-1	727	SQEYLLDEGMAPGTPPK	monophos-(727)SQEYLLDEGMAPGTPPK						220891	227399							108635			2	1	0	3	#DIV/0!	#DIV/0!	#DIV/0!	#DIV/0!
Q6P9K8	Caskin1	Caskin-1	756	RASVPPVPGKPR	monophos-(756)RASVPPVPGKPR			226555														1	0	1	0	#DIV/0!	#DIV/0!	#DIV/0!	#DIV/0!
Q6P9K8	Caskin1	Caskin-1	768	QVLPSGASHFTPPQTPTK	monophos-(768)QVLPSGASHFTPPQTPTK	121695																1	0	1	0	#DIV/0!	#DIV/0!	#DIV/0!	#DIV/0!
Q6P9K8	Caskin1	Caskin-1	786	AQPGSPQALGGPHGPATAK	monophos-(786)AQPGSPQALGGPHGPATAK	889677	1.07565e+06				745090	1.45588e+06	1.29012e+06		332709	1.1777e+06		139812	690374	532152	2.01095e+06	5	6	4	7	0.11892	0.422951	0.418481	0.759001
Q6P9K8	Caskin1	Caskin-1	887	YAASDSEPERDELLVPAAAGPYATVQR	diphos-(887)YAASDSEPERDELLVPAAAGPYATVQR	741137	905578	4.64105e+06	1.9103e+06		786289	2.46697e+06	1.10802e+06	431529	476928	1.07828e+06	2.17921e+06	313934	737173	1.08537e+06	1.17698e+06	7	8	8	7	0.0415435	0.173579	0.0935183	0.454888
Q6P9K8	Caskin1	Caskin-1	887	YAASDSEPERDELLVPAAAGPYATVQR	monophos-(887)YAASDSEPERDELLVPAAAGPYATVQR	211331	242700	679812	538444		277992			254454	223837	367242			268292	639919	460557	5	6	7	4	0.567852	0.853115	0.963339	0.656354
Q6P9K8	Caskin1	Caskin-1	954	SSSAMASANLADEPAPDVEAEDGR	monophos-(954)SSSAMASANLADEPAPDVEAEDGR			395850				157234							142240			2	1	1	2	#DIV/0!	#DIV/0!	#DIV/0!	#DIV/0!
Q6P9K8	Caskin1	Caskin-1	986	RASDLAGSVDTGSAGSVK	monophos-(986)RASDLAGSVDTGSAGSVK	331000	386454				127632		189297	538631	531210				114641	707137		4	4	4	4	0.256031	0.176137	0.134489	0.324295
Q6P9K8	Caskin1	Caskin-1	1023	RPPEGHPTPRPASPEPGR	monophos-(1023)RPPEGHPTPRPASPEPGR			675939					800045					198940			796095	2	2	1	3	0.260901	0.513001	#DIV/0!	#DIV/0!
Q6P9K8	Caskin1	Caskin-1	1080	RGSGEPAEQSHFMEDGTAR	monophos-(1080)RGSGEPAEQSHFMEDGTAR	786300	924195	869254		151115			653923	757166	1.29269e+06	1.48364e+06						5	3	6	2	0.666078	0.0860925	0.573582	0.0500413
Q6P9K8	Caskin1	Caskin-1	1250	KVPLPGPGSPEVK	monophos-(1250)KVPLPGPGSPEVK	1.59292e+06	1.86119e+06	1.02937e+06	2.30018e+06		904063	3.9238e+06	2.38561e+06	2.51264e+06	2.51982e+06	2.80959e+06	1.49548e+06	225578	753959	2.43507e+06	3.9736e+06	7	8	8	7	0.704323	0.877954	0.0321762	0.910977
Q6P9K8	Caskin1	Caskin-1	1264	AHGTPPPVSPKPPPPPTAPKPAK	monophos-(1264)AHGTPPPVSPKPPPPPTAPKPAK			301429														1	0	1	0	#DIV/0!	#DIV/0!	#DIV/0!	#DIV/0!
Q6P9K8	Caskin1	Caskin-1	1307	QPPAALIKPASSPPSQSASPVKPPSPGTPALHVPAKPPR	diphos-(1307)QPPAALIKPASSPPSQSASPVKPPSPGTPALHVPAKPPR			502173		408328			450887			2.1362e+06					4.37666e+06	3	2	2	3	0.00175722	0.241906	0.67495	0.828529
Q6P9K8	Caskin1	Caskin-1	1346	AAASVVSGPPVASDCASPGDSAR	monophos-(1346)AAASVVSGPPVASDCASPGDSAR	306773	565395				199846			466329	614948	359427			399439	301519		3	5	5	3	0.406005	0.531323	0.797957	0.117227
P70677	Casp3	Caspase-3	25	SVDSGIYLDSSYK	monophos-(25)SVDSGIYLDSSYK	96524.6	127931	321462	173783	213805		217906	371323		166172		187721	59055.2	1.61009e+06	228246	234543	7	6	6	7	0.000450136	0.454046	0.000604017	0.281035
P70343	Casp4	Caspase-4	185	DFAALSEHQTSDSTFLVLMSHGTLHGICGTMHSEK	monophos-(185)DFAALSEHQTSDSTFLVLMSHGTLHGICGTMHSEK										86481.5							0	1	1	0	#DIV/0!	#DIV/0!	#DIV/0!	#DIV/0!
P51125	Cast	Calpastatin	292	NEGITQPLPDSPKPMGTDQAIDALSSDFTCSSPTGK	monophos-(292)NEGITQPLPDSPKPMGTDQAIDALSSDFTCSSPTGK									44065.1								0	1	1	0	#DIV/0!	#DIV/0!	#DIV/0!	#DIV/0!
Q9WVC3	Cav2	Caveolin-2	0	MGLETEKADVQLFMADDAYSHHSGVDYADPEK	monophos-(0)MGLETEKADVQLFMADDAYSHHSGVDYADPEK											179640						0	1	1	0	#DIV/0!	#DIV/0!	#DIV/0!	#DIV/0!
Q9WVC3	Cav2	Caveolin-2	7	ADVQLFMADDAYSHHSGVDYADPEK	diphos-(7)ADVQLFMADDAYSHHSGVDYADPEK			565513				453389				367032						2	1	2	1	#DIV/0!	#DIV/0!	#DIV/0!	#DIV/0!
Q61686	Cbx5	Chromobox protein homolog 5	90	KSSFSNSADDIK	monophos-(90)KSSFSNSADDIK	529372	2.00161e+06	1.36842e+06	629909	325290		697593	1.24007e+06			4.28589e+06	351378	255830			687386	7	4	6	5	0.0159254	0.695161	0.0228862	0.211422
Q8K1A6	Cc2d1a	Coiled-coil and C2 domain-containing protein 1A	82	DLDEDEEGTDEDDVEADEDLLAELNEVLGEEQK	monophos-(82)DLDEDEEGTDEDDVEADEDLLAELNEVLGEEQK			303663					137560				178848					2	1	2	1	#DIV/0!	#DIV/0!	#DIV/0!	#DIV/0!
Q8K1A6	Cc2d1a	Coiled-coil and C2 domain-containing protein 1A	427	LANHDEGSDDEEEETPKK	monophos-(427)LANHDEGSDDEEEETPKK	353928	328084	691715	148071				244898	340235	448055		141026	50618.1		285271	502815	5	6	7	4	0.715514	0.6204	0.927497	0.51583
Q8K1A6	Cc2d1a	Coiled-coil and C2 domain-containing protein 1A	457	SSPSKAPPSGPAPAGK	monophos-(457)SSPSKAPPSGPAPAGK	104732	92040.9	168402						354626	112504	317013				88046.2	259361	3	5	6	2	0.212871	0.205985	0.683643	0.857163
Q8VDP4	Ccar2	Cell cycle and apoptosis regulator protein 2	666	LEETEVRSVASNQSEMEYSSLQDMPK	diphos-(666)LEETEVRSVASNQSEMEYSSLQDMPK	57248.4		746290		904762				132233		284736		172629	165036			3	4	4	3	0.0112094	0.27993	0.588314	0.70799
Q8VDP4	Ccar2	Cell cycle and apoptosis regulator protein 2	673	SVASNQSEMEYSSLQDMPK	diphos-(673)SVASNQSEMEYSSLQDMPK	228429	198819	671189	204843	265889	282756		217488		231113	538907			219893	849956		7	4	6	5	0.215345	0.265385	0.554693	0.883502
Q8R344	Ccdc12	Coiled-coil domain-containing protein 12	142	LKGQEDSLASAVDATTGQEACDSD	monophos-(142)LKGQEDSLASAVDATTGQEACDSD			331707					642563			398977	347046				230810	2	3	3	2	0.250537	0.309752	0.0286943	0.77103
Q8CI71	Ccdc132	Coiled-coil domain-containing protein 132	10	QGLKSPPESLNDLGAFESLR	monophos-(10)QGLKSPPESLNDLGAFESLR	166802	125000	584618	219946		165042	509927	311441	283509	188974	570059	200754	211588	134545		661506	7	7	8	6	0.756801	0.821578	0.693366	0.710431
Q8CI71	Ccdc132	Coiled-coil domain-containing protein 132	487	FLEQSRSPSVSPSK	diphos-(487)FLEQSRSPSVSPSK			1.75795e+06	568183	1.40969e+06	364268	3.72979e+06	1.81373e+06	2.0923e+06	1.53716e+06	3.26525e+06		1.06679e+06	698112	1.26745e+06	1.05589e+06	6	7	5	8	0.449379	0.948127	0.975994	0.482482
Q8CI71	Ccdc132	Coiled-coil domain-containing protein 132	487	FLEQSRSPSVSPSK	monophos-(487)FLEQSRSPSVSPSK	350289		311404			99444	403703		295657	260595	388072	350571	114693	59813.8		457694	4	7	6	5	0.97515	0.860696	0.00830016	0.308757
Q8CI71	Ccdc132	Coiled-coil domain-containing protein 132	551	SAYQDYDSDSDVPEELKR	diphos-(551)SAYQDYDSDSDVPEELKR		2.26017e+06	1.62444e+07	1.48775e+07	8.20448e+06	1.10848e+06	2.33508e+07	8.55213e+06	3.90281e+06	3.31832e+06	1.4419e+07	1.35564e+07	2.0252e+06	5.00222e+06	3.9477e+06	1.4602e+07	7	8	7	8	0.359436	0.39855	0.695238	0.692846
Q8CI71	Ccdc132	Coiled-coil domain-containing protein 132	551	SAYQDYDSDSDVPEELKR	monophos-(551)SAYQDYDSDSDVPEELKR	1.0628e+06	1.10571e+06	1.59305e+06	2.74388e+06	1.83742e+06	774782	4.20947e+06	1.46092e+06	1.80708e+06	3.20039e+06	3.55416e+06	2.85916e+06	462126	978826	2.09665e+06	2.64752e+06	8	8	8	8	0.908491	0.533654	0.571627	0.443209
Q3TVA9	Ccdc136	Coiled-coil domain-containing protein 136	47	GLSLTETELEELR	monophos-(47)GLSLTETELEELR	545282	560267	1.07628e+06	1.09969e+06	1.40445e+06	802603	3.57403e+06	1.86444e+06	806458	797185	1.07409e+06	1.39163e+06	672694	657443	2.34653e+06	1.65782e+06	8	8	8	8	0.19602	0.64896	0.00451931	0.0906673
Q3TVA9	Ccdc136	Coiled-coil domain-containing protein 136	366	SRLCTLQQK	monophos-(366)SRLCTLQQK							388923										1	0	0	1	#DIV/0!	#DIV/0!	#DIV/0!	#DIV/0!
Q3UHB8	Ccdc177	Coiled-coil domain-containing protein 177	85	YVLTSPR	monophos-(85)YVLTSPR	421329	370696		461725	337400	202020	762996	452725	533416	589557		412501		154661	533367	704230	7	6	6	7	0.810677	0.572421	0.0358305	0.876554
Q3UHB8	Ccdc177	Coiled-coil domain-containing protein 177	300	SFSLGDLSHSPQTAQHVER	diphos-(300)SFSLGDLSHSPQTAQHVER	640823	1.38218e+06	1.10228e+06	901187	3.67512e+06	1.37736e+06	2.06153e+06	2.906e+06	1.50029e+06	1.64734e+06		852824	1.18883e+06	1.12324e+06	917763	1.84866e+06	8	7	7	8	0.0228594	0.280008	0.0337	0.0751772
Q3UHB8	Ccdc177	Coiled-coil domain-containing protein 177	300	SFSLGDLSHSPQTAQHVER	monophos-(300)SFSLGDLSHSPQTAQHVER	400993		616504		550203	294688		403695		614684			338817			726250	5	3	3	5	0.413816	0.384998	0.714393	0.51413
Q78PG9	Ccdc25	Coiled-coil domain-containing protein 25	191	VENMSSNQDGNDSDEFM	monophos-(191)VENMSSNQDGNDSDEFM		394283	1.0057e+06		545871	80585.5		172090			2.00911e+06			310567		558551	5	3	3	5	0.116063	0.286185	0.0302117	0.226921
D3YZP9	Ccdc6	Coiled-coil domain-containing protein 6	227	LDQPVSAPPSPR	diphos-(227)LDQPVSAPPSPR					1.26391e+06			1.04568e+06									2	0	0	2	#DIV/0!	#DIV/0!	#DIV/0!	#DIV/0!
D3YZP9	Ccdc6	Coiled-coil domain-containing protein 6	227	LDQPVSAPPSPR	monophos-(227)LDQPVSAPPSPR															354638		0	1	0	1	#DIV/0!	#DIV/0!	#DIV/0!	#DIV/0!
D3YZP9	Ccdc6	Coiled-coil domain-containing protein 6	313	QLSESESSLEMDDERYFNEMSAQGLRPR	diphos-(313)QLSESESSLEMDDERYFNEMSAQGLRPR					189136												1	0	0	1	#DIV/0!	#DIV/0!	#DIV/0!	#DIV/0!
D3YZP9	Ccdc6	Coiled-coil domain-containing protein 6	313	QLSESESSLEMDDERYFNEMSAQGLRPR	monophos-(313)QLSESESSLEMDDERYFNEMSAQGLRPR	241091	217507	443648		495410		267434		699839		409723			119638			5	3	5	3	0.15421	0.613161	0.917461	0.470483
D3YZV8	Ccdc8	Coiled-coil domain-containing protein 8 homolog	138	FLGSDVESEDDQELVEAFLR	diphos-(138)FLGSDVESEDDQELVEAFLR								53269.3									1	0	0	1	#DIV/0!	#DIV/0!	#DIV/0!	#DIV/0!
Q5SP85	Ccdc85a	Coiled-coil domain-containing protein 85A	221	HHASGGSPEHLQKPR	monophos-(221)HHASGGSPEHLQKPR					14473.6												1	0	0	1	#DIV/0!	#DIV/0!	#DIV/0!	#DIV/0!
Q5SP85	Ccdc85a	Coiled-coil domain-containing protein 85A	247	STSPEHLHKPR	monophos-(247)STSPEHLHKPR			8806.36			102359			117586								2	1	2	1	#DIV/0!	#DIV/0!	#DIV/0!	#DIV/0!
Q5SP85	Ccdc85a	Coiled-coil domain-containing protein 85A	270	GPSPEHHKPLCKGSPEQQR	monophos-(270)GPSPEHHKPLCKGSPEQQR			44628.9														1	0	1	0	#DIV/0!	#DIV/0!	#DIV/0!	#DIV/0!
Q5SP85	Ccdc85a	Coiled-coil domain-containing protein 85A	289	HPHPGSSPEVLPK	monophos-(289)HPHPGSSPEVLPK			455413														1	0	1	0	#DIV/0!	#DIV/0!	#DIV/0!	#DIV/0!
Q5SP85	Ccdc85a	Coiled-coil domain-containing protein 85A	336	HALGGSLEHLPR	monophos-(336)HALGGSLEHLPR			365508														1	0	1	0	#DIV/0!	#DIV/0!	#DIV/0!	#DIV/0!
Q5SNZ0	Ccdc88a	Girdin	218	DGVHFLPHASSSAQSPCGSPGMK	diphos-(218)DGVHFLPHASSSAQSPCGSPGMK									208158		466081						0	2	2	0	#DIV/0!	#DIV/0!	#DIV/0!	#DIV/0!
Q5SNZ0	Ccdc88a	Girdin	1674	AGSPGSEVVTLQQFLEESNK	monophos-(1674)AGSPGSEVVTLQQFLEESNK	84203.3	54060.6	193212			165075	189309	124053	132792	141009	153348				345046	273151	6	5	6	5	0.298531	0.144137	0.237213	0.0560761
Q5SNZ0	Ccdc88a	Girdin	1701	SSSQENLLDEVMK	monophos-(1701)SSSQENLLDEVMK								138988									1	0	0	1	#DIV/0!	#DIV/0!	#DIV/0!	#DIV/0!
Q8VDN4	Ccdc92	Coiled-coil domain-containing protein 92	191	SLSAPLHPEFEEVYR	monophos-(191)SLSAPLHPEFEEVYR	465484	559832	1.43549e+06	2.97361e+06	2.0735e+06	535666	889644	2.22895e+06	932092	295272	1.70863e+06	1.70494e+06	502620	509198	1.80705e+06	2.57396e+06	8	8	8	8	0.702983	0.752868	0.955568	0.77061
Q8K2Y9	Ccm2	Malcavernin	65	EVKYLGQLTSIPGYLNPSSR	diphos-(65)EVKYLGQLTSIPGYLNPSSR													526361				0	1	0	1	#DIV/0!	#DIV/0!	#DIV/0!	#DIV/0!
Q8K2Y9	Ccm2	Malcavernin	387	GIITDSFGR	monophos-(387)GIITDSFGR	237996	224364	459514	445869	146203	211892	638019	486682	333941	285396	560528	505136	98157.6	146866	544053	633005	8	8	8	8	0.708682	0.73808	0.133033	0.847373
Q8K2Y9	Ccm2	Malcavernin	432	MISDISSDIEALGCSMDQDSA	monophos-(432)MISDISSDIEALGCSMDQDSA			117865								230044						1	1	2	0	#DIV/0!	#DIV/0!	#DIV/0!	#DIV/0!
Q61458	Ccnh	Cyclin-H	308	QEEEEWTDDDLVDSL	monophos-(308)QEEEEWTDDDLVDSL			357217														1	0	1	0	#DIV/0!	#DIV/0!	#DIV/0!	#DIV/0!
Q8BGU5	Ccny	Cyclin-Y	22	LESYRPDTDLSREDTGCNLQHISDR	diphos-(22)LESYRPDTDLSREDTGCNLQHISDR	52927.8	244918			335311	609024									714410	1.6442e+06	4	2	2	4	0.130909	0.0596584	0.346678	0.190974
Q8BGU5	Ccny	Cyclin-Y	22	LESYRPDTDLSR	monophos-(22)LESYRPDTDLSR			333319								243123					182249	1	2	2	1	#DIV/0!	#DIV/0!	#DIV/0!	#DIV/0!
Q8BGU5	Ccny	Cyclin-Y	64	ASTIFLSKSQTDVR	monophos-(64)ASTIFLSKSQTDVR	154945		96283.5		263962		342415						222314				4	1	2	3	#DIV/0!	#DIV/0!	0.866877	0.0583088
Q8BGU5	Ccny	Cyclin-Y	96	KYSSCSTIFLDDSTVSQPNLK	monophos-(96)KYSSCSTIFLDDSTVSQPNLK	136952	696510	2.69398e+06		1.01207e+07	951385			790792		5.90312e+06	452204	339592	387098	237900	813797	5	7	6	6	0.125178	0.380462	0.234743	0.847397
Q8BGU5	Ccny	Cyclin-Y	322	RSASADNLILPR	monophos-(322)RSASADNLILPR	6.61524e+06	9.12068e+06	1.47561e+07	1.06551e+07	8.48673e+06	3.51281e+06	2.38364e+07	1.86726e+07	9.81533e+06	6.98639e+06	1.4042e+07	1.83457e+07	3.99605e+06	3.66986e+06	1.8238e+07	2.08259e+07	8	8	8	8	0.971576	0.992361	0.0688947	0.691335
Q8QZT2	Ccsap	Centriole, cilia and spindle-associated protein	69	GALGEPSAPSAR	monophos-(69)GALGEPSAPSAR							464061										1	0	0	1	#DIV/0!	#DIV/0!	#DIV/0!	#DIV/0!
Q8QZT2	Ccsap	Centriole, cilia and spindle-associated protein	219	AHSVDVEK	monophos-(219)AHSVDVEK				62595.7		16515.4	56089.9							34829			3	1	1	3	#DIV/0!	#DIV/0!	#DIV/0!	#DIV/0!
Q76KJ5	Cd3eap	DNA-directed RNA polymerase I subunit RPA34	0	MAGTQACSATRFSCPPHFTEMSPDSEPSR	monophos-(0)MAGTQACSATRFSCPPHFTEMSPDSEPSR						917664											1	0	0	1	#DIV/0!	#DIV/0!	#DIV/0!	#DIV/0!
Q91W92	Cdc42ep1	Cdc42 effector protein 1	203	RSDSLLSFR	diphos-(203)RSDSLLSFR								474634			277458						1	1	1	1	#DIV/0!	#DIV/0!	#DIV/0!	#DIV/0!
Q91W92	Cdc42ep1	Cdc42 effector protein 1	203	RSDSLLSFR	monophos-(203)RSDSLLSFR			250675					183879			474220						2	1	2	1	#DIV/0!	#DIV/0!	#DIV/0!	#DIV/0!
Q9JM96	Cdc42ep4	Cdc42 effector protein 4	17	SRADLTAEMISAPLGDFR	monophos-(17)SRADLTAEMISAPLGDFR								74739.4									1	0	0	1	#DIV/0!	#DIV/0!	#DIV/0!	#DIV/0!
Q9JM96	Cdc42ep4	Cdc42 effector protein 4	56	AREADDESLDEQASASK	monophos-(56)AREADDESLDEQASASK	189327	267411	710838					675729			305842					268973	4	2	4	2	0.141309	0.441772	0.611257	0.65365
Q9JM96	Cdc42ep4	Cdc42 effector protein 4	135	SLSSSPVKK	diphos-(135)SLSSSPVKK						45258.8					238638						1	1	1	1	#DIV/0!	#DIV/0!	#DIV/0!	#DIV/0!
Q9JM96	Cdc42ep4	Cdc42 effector protein 4	218	DQWGSEEEEEAGGYR	monophos-(218)DQWGSEEEEEAGGYR	249541		447639			54494.3					372529						3	1	3	1	#DIV/0!	#DIV/0!	#DIV/0!	#DIV/0!
P70408	Cdh10	Cadherin-10	699	RTPTAPDNTDVR	monophos-(699)RTPTAPDNTDVR	101093	116059				56473.8								59695.5	149269		3	2	2	3	0.355474	0.765185	0.281323	0.647185
P70408	Cdh10	Cadherin-10	774	LAEMYGGGESDKDA	monophos-(774)LAEMYGGGESDKDA	398369		738628		640278	283122	1.2149e+06				1.24515e+06		220452	376926	941905	1.02435e+06	5	5	3	7	0.713844	0.686711	0.747297	0.671489
P55288	Cdh11	Cadherin-11	781	LADLYGSKDTFDDDS	monophos-(781)LADLYGSKDTFDDDS				363345			636801							181442			2	1	1	2	#DIV/0!	#DIV/0!	#DIV/0!	#DIV/0!
P97326	Cdh6	Cadherin-6	776	LADMYGGMDSDKDS	monophos-(776)LADMYGGMDSDKDS	205821		504105		176921	156811	559117							200469	600771		5	2	2	5	0.438289	0.674991	0.788452	0.933248
P24788	Cdk11b	Cyclin-dependent kinase 11B	260	DLLSDLQDISDSER	monophos-(260)DLLSDLQDISDSER		85499.1							129002						489692		1	2	2	1	#DIV/0!	#DIV/0!	#DIV/0!	#DIV/0!
P24788	Cdk11b	Cyclin-dependent kinase 11B	574	EYGSPLKAYTPVVVTLWYR	diphos-(574)EYGSPLKAYTPVVVTLWYR											110901						0	1	1	0	#DIV/0!	#DIV/0!	#DIV/0!	#DIV/0!
Q14AX6	Cdk12	Cyclin-dependent kinase 12	659	HLLTDLPLPPELPGGDPSPPDSPEPK	diphos-(659)HLLTDLPLPPELPGGDPSPPDSPEPK			734789	197555		201961		298953	114876		318400		191572	160783		312928	4	5	4	5	0.076889	0.291097	0.0209768	0.494131
O35495	Cdk14	Cyclin-dependent kinase 14	75	TQSTFDPFEKPANQVK	monophos-(75)TQSTFDPFEKPANQVK	185827	888498	1.07463e+06		313048					192073				110260		410267	4	3	4	3	0.232017	0.215564	0.199545	0.328842
O35495	Cdk14	Cyclin-dependent kinase 14	92	VHSENNACINFK	monophos-(92)VHSENNACINFK		668990	155222		198739												3	0	2	1	#DIV/0!	#DIV/0!	#DIV/0!	#DIV/0!
O35495	Cdk14	Cyclin-dependent kinase 14	116	RHSSPSSPTSPK	monophos-(116)RHSSPSSPTSPK	15867.7	77049.7	5739.67											43668.4		137235	3	2	3	2	0.457007	0.292514	0.457007	0.292514
O35495	Cdk14	Cyclin-dependent kinase 14	131	ADSYEKLEK	monophos-(131)ADSYEKLEK																604511	0	1	0	1	#DIV/0!	#DIV/0!	#DIV/0!	#DIV/0!
Q04735	Cdk16	Cyclin-dependent kinase 16	116	RLSLPADIR	monophos-(116)RLSLPADIR	271753	340607			346926	216618		1.24127e+06	287578		391032		206246	105912		591724	5	5	4	6	0.136781	0.44609	0.00655169	0.491891
Q04735	Cdk16	Cyclin-dependent kinase 16	150	RVSLSEIGFGK	monophos-(150)RVSLSEIGFGK	92051.7	103142			108357		375599	310523	110751				71154.1				5	2	3	4	0.309263	0.339106	0.00789615	0.223125
Q8K0D0	Cdk17	Cyclin-dependent kinase 17	134	RISMEDLNK	monophos-(134)RISMEDLNK					566594												1	0	0	1	#DIV/0!	#DIV/0!	#DIV/0!	#DIV/0!
Q8K0D0	Cdk17	Cyclin-dependent kinase 17	143	RLSLPADIR	monophos-(143)RLSLPADIR	271753	340607			346926	216618		1.24127e+06	287578		391032		206246	105912		591724	5	5	4	6	0.136781	0.44609	0.00655169	0.491891
Q8K0D0	Cdk17	Cyclin-dependent kinase 17	160	LQISSPPFDQPMSR	monophos-(160)LQISSPPFDQPMSR	1.42262e+06	177134				448539		321271	354918	187372				352798			4	3	4	3	0.0566281	0.423066	0.0244002	0.628052
Q8K0D0	Cdk17	Cyclin-dependent kinase 17	177	RASLSEIGFGK	monophos-(177)RASLSEIGFGK	288722	322698			352489	164884		520184	450110	206343	317234		168585	314822		244669	5	6	5	6	0.601679	0.519133	0.431827	0.75298
Q04899	Cdk18	Cyclin-dependent kinase 18	63	RFSMEDLNK	monophos-(63)RFSMEDLNK	109533	214035			256071	170038	569070	404383	205048		779077		326014		288922	511855	6	5	4	7	0.529035	0.290296	0.107632	0.803086
Q04899	Cdk18	Cyclin-dependent kinase 18	72	RLSLPMDIR	monophos-(72)RLSLPMDIR	76758.1	153573	254041		167474	79509	551222	269843	129395		317771		165634		481622	367166	7	5	5	7	0.856336	0.459665	0.274717	0.233161
Q04899	Cdk18	Cyclin-dependent kinase 18	106	RASLSDIGFGK	monophos-(106)RASLSDIGFGK	377462	629075	1.31302e+06		694106	324075	2.12961e+06	998572	589474		1.3995e+06	1.07657e+06	333568	275917	1.19601e+06	1.41268e+06	7	7	6	8	0.546431	0.93288	0.361778	0.941156
O35926	Cdk5r2	Cyclin-dependent kinase 5 activator 2	81	KVTPKPASTGPDPLVQQR	diphos-(81)KVTPKPASTGPDPLVQQR	45717.1																1	0	1	0	#DIV/0!	#DIV/0!	#DIV/0!	#DIV/0!
O35926	Cdk5r2	Cyclin-dependent kinase 5 activator 2	81	KVTPKPASTGPDPLVQQR	monophos-(81)KVTPKPASTGPDPLVQQR	86583.8										280813						1	1	2	0	#DIV/0!	#DIV/0!	#DIV/0!	#DIV/0!
Q03147	Cdk7	Cyclin-dependent kinase 7	167	AYTHQVVTR	monophos-(167)AYTHQVVTR		98092.6															1	0	1	0	#DIV/0!	#DIV/0!	#DIV/0!	#DIV/0!
Q3UTQ8	Cdkl5	Cyclin-dependent kinase-like 5	340	SNSKDIQNLSVGLPR	monophos-(340)SNSKDIQNLSVGLPR			306326														1	0	1	0	#DIV/0!	#DIV/0!	#DIV/0!	#DIV/0!
P46414	Cdkn1b	Cyclin-dependent kinase inhibitor 1B	5	VSNGSPSLER	monophos-(5)VSNGSPSLER											168452						0	1	1	0	#DIV/0!	#DIV/0!	#DIV/0!	#DIV/0!
P46414	Cdkn1b	Cyclin-dependent kinase inhibitor 1B	100	VLAQESQDVSGSR	monophos-(100)VLAQESQDVSGSR	257414	1.34073e+06	685247	745327	253779		378128	336617		1.29468e+06	176156	586843	536875	202692	1.40956e+06	428075	7	7	7	7	0.582998	0.710341	0.818924	0.362322
A2A6T1	Cdr2l	Cerebellar degeneration-related protein 2-like	267	EEHLAEALLAPLTQAPEADDPQPGSGDDSNAQDGVSSPAASPSHAVR	diphos-(267)EEHLAEALLAPLTQAPEADDPQPGSGDDSNAQDGVSSPAASPSHAVR					112120			142126			596038						2	1	1	2	#DIV/0!	#DIV/0!	#DIV/0!	#DIV/0!
P98191	Cds1	Phosphatidate cytidylyltransferase 1	22	EGEAAGGDHETESTSDKETDIDDR	monophos-(22)EGEAAGGDHETESTSDKETDIDDR		318914	421799														2	0	2	0	#DIV/0!	#DIV/0!	#DIV/0!	#DIV/0!
Q99L43	Cds2	Phosphatidate cytidylyltransferase 2	25	LDGETASDSESRAETAPLPTSVDDTPEVLNR	diphos-(25)LDGETASDSESRAETAPLPTSVDDTPEVLNR										202424							0	1	1	0	#DIV/0!	#DIV/0!	#DIV/0!	#DIV/0!
Q99L43	Cds2	Phosphatidate cytidylyltransferase 2	25	LDGETASDSESRAETAPLPTSVDDTPEVLNR	monophos-(25)LDGETASDSESRAETAPLPTSVDDTPEVLNR	40784.8	1.00533e+06	1.41694e+06						435426	1.78231e+06	58190.9		468317				3	4	6	1	0.997577	0.819653	#DIV/0!	#DIV/0!
Q4VAA2	Cdv3	Protein CDV3	27	AANAASGAGGSSAAAGSRPGDGGSLGSGARSGDGGSLGSGSR	diphos-(27)AANAASGAGGSSAAAGSRPGDGGSLGSGARSGDGGSLGSGSR							230597				744024	715047					1	2	2	1	#DIV/0!	#DIV/0!	#DIV/0!	#DIV/0!
Q9JKC6	Cend1	Cell cycle exit and neuronal differentiation protein 1	6	SASSPKPDTKVPQATAEAK	monophos-(6)SASSPKPDTKVPQATAEAK	1.52836e+06	345669	4.64744e+06	9.33488e+06	678427	152643	3.14956e+06	1.27475e+07	1.1531e+06	87919.3	8.52389e+06	5.24396e+06	609709	1.18455e+06	4.10834e+06	1.71896e+07	8	8	8	8	0.579004	0.796526	0.160251	0.674915
Q9JKC6	Cend1	Cell cycle exit and neuronal differentiation protein 1	66	ADPVLLNNHSNLKPAPTVPAAPSSPDATSEPK	diphos-(66)ADPVLLNNHSNLKPAPTVPAAPSSPDATSEPK			118762		137491				308811		2.46457e+06					670855	2	3	3	2	0.0162234	0.265565	0.401035	0.611695
Q9JKC6	Cend1	Cell cycle exit and neuronal differentiation protein 1	66	ADPVLLNNHSNLKPAPTVPAAPSSPDATSEPKGPGDGAEEDESNTGGR	monophos-(66)ADPVLLNNHSNLKPAPTVPAAPSSPDATSEPKGPGDGAEEDESNTGGR	1.87028e+06	48890.1	4.38664e+06	3.49747e+06	3.61956e+06	1.31265e+06	3.64697e+06	3.71881e+06	3.37768e+06		2.17031e+07	272236	93278.7		1.89504e+06	7.24041e+06	8	6	7	7	0.000277883	0.416577	0.0108662	0.533914
Q9JKC6	Cend1	Cell cycle exit and neuronal differentiation protein 1	98	GPGDGAEEDESNTGGR	monophos-(98)GPGDGAEEDESNTGGR											15817.5						0	1	1	0	#DIV/0!	#DIV/0!	#DIV/0!	#DIV/0!
Q6A065	Cep170	Centrosomal protein of 170 kDa	202	SQEAGASGCSTEAKHVEGQSAAASEEALFPFCR	monophos-(202)SQEAGASGCSTEAKHVEGQSAAASEEALFPFCR			334228														1	0	1	0	#DIV/0!	#DIV/0!	#DIV/0!	#DIV/0!
Q6A065	Cep170	Centrosomal protein of 170 kDa	354	SIKSDVPVYLK	diphos-(354)SIKSDVPVYLK				264171			262157	253677							210982		3	1	1	3	#DIV/0!	#DIV/0!	#DIV/0!	#DIV/0!
Q6A065	Cep170	Centrosomal protein of 170 kDa	371	HDDGTQSDSENAGAHRR	monophos-(371)HDDGTQSDSENAGAHRR																5628.79	0	1	0	1	#DIV/0!	#DIV/0!	#DIV/0!	#DIV/0!
Q6A065	Cep170	Centrosomal protein of 170 kDa	409	AQSTEKHQEQAATSSTHHR	monophos-(409)AQSTEKHQEQAATSSTHHR						2668.05											1	0	0	1	#DIV/0!	#DIV/0!	#DIV/0!	#DIV/0!
Q6A065	Cep170	Centrosomal protein of 170 kDa	459	SSGSLGHRPSQEMDVMLK	monophos-(459)SSGSLGHRPSQEMDVMLK			569442					289548									2	0	1	1	#DIV/0!	#DIV/0!	#DIV/0!	#DIV/0!
Q6A065	Cep170	Centrosomal protein of 170 kDa	869	SDSLDTDSSMDTTLILK	monophos-(869)SDSLDTDSSMDTTLILK	165712		463237	348703			61201.3	174216		626882					502041	199946	5	3	4	4	0.53595	0.183455	0.961981	0.263562
Q6A065	Cep170	Centrosomal protein of 170 kDa	1003	IRQPSIDLTDDDQTSSVPHSAISDIMSSDQETYSCK	diphos-(1003)IRQPSIDLTDDDQTSSVPHSAISDIMSSDQETYSCK			1.1227e+06			174807											2	0	1	1	#DIV/0!	#DIV/0!	#DIV/0!	#DIV/0!
Q6A065	Cep170	Centrosomal protein of 170 kDa	1003	IRQPSIDLTDDDQTSSVPHSAISDIMSSDQETYSCK	monophos-(1003)IRQPSIDLTDDDQTSSVPHSAISDIMSSDQETYSCK			210334														1	0	1	0	#DIV/0!	#DIV/0!	#DIV/0!	#DIV/0!
Q80U49	Cep170b	Centrosomal protein of 170 kDa protein B	350	GHKHEDGTQSDSEDPLAK	monophos-(350)GHKHEDGTQSDSEDPLAK	1.07455e+06	462336	1.0441e+06			291997		685233	373087	254730	2.41257e+06		119677		497211		5	5	6	4	0.0764551	0.966136	0.0795621	0.236476
Q80U49	Cep170b	Centrosomal protein of 170 kDa protein B	353	HEDGTQSDSEDPLAKTASVSGASAEASGEQVR	diphos-(353)HEDGTQSDSEDPLAKTASVSGASAEASGEQVR											8309.15						0	1	1	0	#DIV/0!	#DIV/0!	#DIV/0!	#DIV/0!
Q80U49	Cep170b	Centrosomal protein of 170 kDa protein B	418	SQSFTHTPPADPK	monophos-(418)SQSFTHTPPADPK		397464			240562	114594									332140		3	1	1	3	#DIV/0!	#DIV/0!	#DIV/0!	#DIV/0!
Q80U49	Cep170b	Centrosomal protein of 170 kDa protein B	531	GASPVTPSTTPPPPTDPQLTK	diphos-(531)GASPVTPSTTPPPPTDPQLTK					95796.8										531173		1	1	0	2	#DIV/0!	#DIV/0!	#DIV/0!	#DIV/0!
Q80U49	Cep170b	Centrosomal protein of 170 kDa protein B	859	QESFTKEPTSGPPAPGK	monophos-(859)QESFTKEPTSGPPAPGK	1.19256e+06	1.33961e+06	1.67923e+06			520402	1.38081e+06	836722	191982	1.07101e+06	1.92319e+06		422787	1.03029e+06	1.35014e+06		6	6	6	6	0.388456	0.613902	0.411311	0.319905
Q80U49	Cep170b	Centrosomal protein of 170 kDa protein B	923	SKSADECDGGSTPRPPEDSLSGDSDVDTASTISLLSGK	diphos-(923)SKSADECDGGSTPRPPEDSLSGDSDVDTASTISLLSGK												231795					0	1	1	0	#DIV/0!	#DIV/0!	#DIV/0!	#DIV/0!
Q80U49	Cep170b	Centrosomal protein of 170 kDa protein B	923	SKSADECDGGSTPRPPEDSLSGDSDVDTASTISLLSGK	monophos-(923)SKSADECDGGSTPRPPEDSLSGDSDVDTASTISLLSGK											847686						0	1	1	0	#DIV/0!	#DIV/0!	#DIV/0!	#DIV/0!
Q80U49	Cep170b	Centrosomal protein of 170 kDa protein B	961	NGPSPTTPQTPGPQK	monophos-(961)NGPSPTTPQTPGPQK														233102			0	1	0	1	#DIV/0!	#DIV/0!	#DIV/0!	#DIV/0!
Q80U49	Cep170b	Centrosomal protein of 170 kDa protein B	1025	GHGSRGSLDWPEEER	diphos-(1025)GHGSRGSLDWPEEER	384730	879345	814948	1.11862e+06	774137	437410		720503			1.08722e+06		392362				7	2	5	4	0.202629	0.977651	0.519248	0.152589
Q80U49	Cep170b	Centrosomal protein of 170 kDa protein B	1030	GSLDWPEEER	monophos-(1030)GSLDWPEEER	180248	172246		438703	161582	127140	842201	270683	263740	265424	357302	350520		109555	510553	585750	7	7	7	7	0.279005	0.759519	0.0219385	0.482613
Q80U49	Cep170b	Centrosomal protein of 170 kDa protein B	1098	SNSLSTPRPTR	monophos-(1098)SNSLSTPRPTR	508309	584545	606825	797588	263976	444059				790693	749894		120810	397210	275695		6	5	6	5	0.301639	0.649855	0.913455	0.000785893
Q80U49	Cep170b	Centrosomal protein of 170 kDa protein B	1117	LGDASDTEAVDGER	monophos-(1117)LGDASDTEAVDGER							580675										1	0	0	1	#DIV/0!	#DIV/0!	#DIV/0!	#DIV/0!
Q80U49	Cep170b	Centrosomal protein of 170 kDa protein B	1282	SQGPRDTDDDEEEPDPYGFIVQTAEIAEIAR	monophos-(1282)SQGPRDTDDDEEEPDPYGFIVQTAEIAEIAR	120130	124701	709900	273016		110308		393196	107827		421694	845103	70846.2	44758.7		263302	6	6	7	5	0.576312	0.981641	0.189315	0.214138
Q80U49	Cep170b	Centrosomal protein of 170 kDa protein B	1287	DTDDDEEEPDPYGFIVQTAEIAEIAR	monophos-(1287)DTDDDEEEPDPYGFIVQTAEIAEIAR			81965.3			60407.6	100473	145443				605424		105539	95968.5	179031	4	4	2	6	0.0108713	0.306071	0.000599429	0.541773
Q80U49	Cep170b	Centrosomal protein of 170 kDa protein B	1327	EIHDVAGDGDSLGSPGPTRSPSLGNVPNTPASTISAR	diphos-(1327)EIHDVAGDGDSLGSPGPTRSPSLGNVPNTPASTISAR													166541	223626			0	2	0	2	#DIV/0!	#DIV/0!	#DIV/0!	#DIV/0!
Q80U49	Cep170b	Centrosomal protein of 170 kDa protein B	1327	EIHDVAGDGDSLGSPGPTR	monophos-(1327)EIHDVAGDGDSLGSPGPTR	512748	6.76391e+06	804720	5.79214e+06		1.49475e+06	1.48702e+06	298208	377724	582435	870247	2.35143e+07		501320	1.19258e+07	3.23331e+06	7	7	8	6	0.0103435	0.360168	0.21493	0.63854
Q80U49	Cep170b	Centrosomal protein of 170 kDa protein B	1346	SPSLGNVPNTPASTISAR	monophos-(1346)SPSLGNVPNTPASTISAR		1.12318e+06			132527	358239			583402	1.57835e+06				301174	1010476		3	4	3	4	0.994401	0.460679	0.650814	0.109493
Q99NF3	Cep41	Centrosomal protein of 41 kDa	90	LEDNDSATSEADAEIAAK	diphos-(90)LEDNDSATSEADAEIAAK			332351								800757					659076	1	2	2	1	#DIV/0!	#DIV/0!	#DIV/0!	#DIV/0!
Q99NF3	Cep41	Centrosomal protein of 41 kDa	343	GGQNLPTSCPASHSSPR	monophos-(343)GGQNLPTSCPASHSSPR											280876						0	1	1	0	#DIV/0!	#DIV/0!	#DIV/0!	#DIV/0!
P18760	Cfl1	Cofilin-1	34	AVLFCLSEDKK	monophos-(34)AVLFCLSEDKK		146786	296465	328359	59196.1		760185		204615		504878	351602	125386		230056	230493	5	6	6	5	0.156644	0.73436	0.109431	0.850129
P18760	Cfl1	Cofilin-1	132	HELQANCYEEVKDR	monophos-(132)HELQANCYEEVKDR											627650						0	1	1	0	#DIV/0!	#DIV/0!	#DIV/0!	#DIV/0!
P18760	Cfl1	Cofilin-1	152	LGGSAVISLEGKPL	monophos-(152)LGGSAVISLEGKPL			35411.2				140268				64462.9						2	1	2	1	#DIV/0!	#DIV/0!	#DIV/0!	#DIV/0!
Q9D1L0	Chchd2	Coiled-coil-helix-coiled-coil-helix domain-containing protein 2, mitochondrial	27	RAPAAQPPAAAAPSAVGSPAAAPR	monophos-(27)RAPAAQPPAAAAPSAVGSPAAAPR	82608	103867	106226	154053	59713		305430	337855			518237	304253			164524	294882	7	4	6	5	0.522955	0.0759794	0.486097	0.821768
Q9CRB9	Chchd3	Coiled-coil-helix-coiled-coil-helix domain-containing protein 3, mitochondrial	48	YSSVYGASVSDEDLK	monophos-(48)YSSVYGASVSDEDLK		186513	238195		220797			455972		302266	661051	128076				211750	4	4	5	3	0.313142	0.716201	0.650012	0.960991
Q91VN4	Chchd6	Coiled-coil-helix-coiled-coil-helix domain-containing protein 6, mitochondrial	10	RVSFEMDEEER	monophos-(10)RVSFEMDEEER	132980	203629					308777			182122	166783						3	2	4	1	0.172752	0.582284	#DIV/0!	#DIV/0!
Q91VN4	Chchd6	Coiled-coil-helix-coiled-coil-helix domain-containing protein 6, mitochondrial	29	LSESVVNR	monophos-(29)LSESVVNR		140290					221936				153786						2	1	2	1	#DIV/0!	#DIV/0!	#DIV/0!	#DIV/0!
Q91VN4	Chchd6	Coiled-coil-helix-coiled-coil-helix domain-containing protein 6, mitochondrial	161	KASLTHEQQQSAR	monophos-(161)KASLTHEQQQSAR											23595.2						0	1	1	0	#DIV/0!	#DIV/0!	#DIV/0!	#DIV/0!
Q8CGZ0	Cherp	Calcium homeostasis endoplasmic reticulum protein	823	SRSPTPPSAAGLGSNSAPPIPDSR	diphos-(823)SRSPTPPSAAGLGSNSAPPIPDSR														70061.6			0	1	0	1	#DIV/0!	#DIV/0!	#DIV/0!	#DIV/0!
P16014	Chgb	Secretogranin-1	96	WASSREDAGAPVEDSQGQTK	monophos-(96)WASSREDAGAPVEDSQGQTK			479482					142680			474491	430356				367469	2	3	3	2	0.0948089	0.454084	0.0554731	0.0963008
P70232	Chl1	Neural cell adhesion molecule L1-like protein	1154	NMQPTESADSLVEYGEGDQSIFNEDGSFIGAYTGAK	diphos-(1154)NMQPTESADSLVEYGEGDQSIFNEDGSFIGAYTGAK							120355										1	0	0	1	#DIV/0!	#DIV/0!	#DIV/0!	#DIV/0!
Q8BJF9	Chmp2b	Charged multivesicular body protein 2b	195	ATISDEEIER	monophos-(195)ATISDEEIER			224102				761643	409260				304630			250145	565104	3	3	2	4	0.550723	0.646446	0.377368	0.233935
Q9CQ10	Chmp3	Charged multivesicular body protein 3	183	VTDALPEPEPAGAMAASEEGEEEEDEEDLEAMQSR	monophos-(183)VTDALPEPEPAGAMAASEEGEEEEDEEDLEAMQSR		89425.6					154458				441047	191445					2	2	3	1	0.324521	0.270888	#DIV/0!	#DIV/0!
P0C0A3	Chmp6	Charged multivesicular body protein 6	113	MHQVMSIEEVER	monophos-(113)MHQVMSIEEVER	532452	763314	853107	226872	448545		1.96769e+06		927613	852044	725979	511721	1.51634e+06		409585	413340	6	7	8	5	0.299076	0.907431	0.0103121	0.457379
Q8R1T1	Chmp7	Charged multivesicular body protein 7	230	VSPVNDVDVGVYQLMQSEQLLSR	monophos-(230)VSPVNDVDVGVYQLMQSEQLLSR			252597		237314	90407.7		110989			439507		98530.6				4	2	2	4	0.127858	0.474243	0.304186	0.0518571
Q9ERZ4	Chrm2	Muscarinic acetylcholine receptor M2	221	KEPVANQDPVSPSLVQGR	monophos-(221)KEPVANQDPVSPSLVQGR													93249.6				0	1	0	1	#DIV/0!	#DIV/0!	#DIV/0!	#DIV/0!
Q8WTY4	Ciapin1	Anamorsin	132	EALSPEEVQSVQEHLGYHSDSLR	monophos-(132)EALSPEEVQSVQEHLGYHSDSLR			275581								995116					261805	1	2	2	1	#DIV/0!	#DIV/0!	#DIV/0!	#DIV/0!
Q924A2	Cic	Protein capicua homolog	2260	FAELPEFRPEEVLPSPTLQSLATSPR	diphos-(2260)FAELPEFRPEEVLPSPTLQSLATSPR						96321.3		178566			234119	167671	108514				2	3	2	3	0.90483	0.600562	0.801496	0.175076
Q9DA19	Cir1	Corepressor interacting with RBPJ 1	188	NLTANDPSQDYVASDCEEDPEVEFLK	monophos-(188)NLTANDPSQDYVASDCEEDPEVEFLK			225544						65693.2		100832						1	2	3	0	#DIV/0!	#DIV/0!	#DIV/0!	#DIV/0!
Q04447	Ckb	Creatine kinase B-type	32	VLTPELYAELR	monophos-(32)VLTPELYAELR	19605.6	22040						110962	37454.5	21192.3					87212.2	117009	3	4	4	3	0.750211	0.699442	0.320187	0.000309716
Q04447	Ckb	Creatine kinase B-type	156	LAVEALSSLDGDLSGR	monophos-(156)LAVEALSSLDGDLSGR	104300	55640.5	659814		249043	167218	326027	2.52842e+06	180843	275854	2.41317e+06	639731	104942		794442		7	6	7	6	0.990805	0.762602	0.772815	0.878094
Q04447	Ckb	Creatine kinase B-type	304	HEKFSEVLK	monophos-(304)HEKFSEVLK					128344												1	0	0	1	#DIV/0!	#DIV/0!	#DIV/0!	#DIV/0!
Q04447	Ckb	Creatine kinase B-type	319	RGTGGVDTAAVGGVFDVSNADR	monophos-(319)RGTGGVDTAAVGGVFDVSNADR			263109		105109					301969							2	1	2	1	#DIV/0!	#DIV/0!	#DIV/0!	#DIV/0!
Q04447	Ckb	Creatine kinase B-type	320	GTGGVDTAAVGGVFDVSNADR	monophos-(320)GTGGVDTAAVGGVFDVSNADR	55227.4	75946.2			163273	56062.5			91238	75679.3							4	2	4	2	0.311931	0.919598	0.0286852	0.630033
P30275	Ckmt1	Creatine kinase U-type, mitochondrial	149	IRSGYFDER	monophos-(149)IRSGYFDER							581280	235083									2	0	0	2	#DIV/0!	#DIV/0!	#DIV/0!	#DIV/0!
P30275	Ckmt1	Creatine kinase U-type, mitochondrial	353	RGTGGVDTAATGSVFDISNLDR	diphos-(353)RGTGGVDTAATGSVFDISNLDR						497712						198565		386293			1	2	1	2	#DIV/0!	#DIV/0!	#DIV/0!	#DIV/0!
P30275	Ckmt1	Creatine kinase U-type, mitochondrial	353	RGTGGVDTAATGSVFDISNLDR	monophos-(353)RGTGGVDTAATGSVFDISNLDR			268076		157870		148512		119975		631330		93657.6		211451		3	4	3	4	0.133613	0.651584	0.0210359	0.343145
P30275	Ckmt1	Creatine kinase U-type, mitochondrial	354	GTGGVDTAATGSVFDISNLDR	monophos-(354)GTGGVDTAATGSVFDISNLDR	291613	688530	2.03905e+06	329809	433531	297414	908895	1.19987e+06	532427	276323	1.56339e+06	573942	137658	386909	469586	453098	8	8	8	8	0.393852	0.409146	0.114192	0.354329
Q80TV8	Clasp1	CLIP-associating protein 1	142	TREGICLCLIATLNASGAQTLTLSK	diphos-(142)TREGICLCLIATLNASGAQTLTLSK						105984											1	0	0	1	#DIV/0!	#DIV/0!	#DIV/0!	#DIV/0!
Q80TV8	Clasp1	CLIP-associating protein 1	597	SRSDIDVNAAASAK	monophos-(597)SRSDIDVNAAASAK	1.36219e+06	1.77034e+06		617626	2.35195e+06	1.1429e+06			3.86177e+06	1.40368e+06	755500		1.3152e+06	396537	2.2044e+06		5	6	6	5	0.236528	0.746153	0.484418	0.81944
Q80TV8	Clasp1	CLIP-associating protein 1	685	SSSPGKLLGSGLAGGSSR	monophos-(685)SSSPGKLLGSGLAGGSSR													147220				0	1	0	1	#DIV/0!	#DIV/0!	#DIV/0!	#DIV/0!
Q80TV8	Clasp1	CLIP-associating protein 1	1079	NSSNTGVGSPSNTIGR	monophos-(1079)NSSNTGVGSPSNTIGR	561765	564976			395079	295213			1.42975e+06				194412	358110	412115		4	4	3	5	0.0403587	0.648154	0.00695455	0.211087
Q80TV8	Clasp1	CLIP-associating protein 1	1104	TSPLTSPTNCSHGGLSPSR	diphos-(1104)TSPLTSPTNCSHGGLSPSR					436598									104301			1	1	0	2	#DIV/0!	#DIV/0!	#DIV/0!	#DIV/0!
Q80TV8	Clasp1	CLIP-associating protein 1	1192	SQEDLNEPIKR	monophos-(1192)SQEDLNEPIKR						170941								371840	321062		1	2	0	3	#DIV/0!	#DIV/0!	#DIV/0!	#DIV/0!
Q8BRT1	Clasp2	CLIP-associating protein 2	8	ICDYKSFDDEESVDGNRPSSAASAFK	monophos-(8)ICDYKSFDDEESVDGNRPSSAASAFK	338324	495757	519767			107642			391094	490698	966596		69295.7				4	4	6	2	0.299312	0.604048	0.183811	0.0369894
Q8BRT1	Clasp2	CLIP-associating protein 2	288	NHFPGEAETLYNSLEPSYQKSLQTYLK	monophos-(288)NHFPGEAETLYNSLEPSYQKSLQTYLK															238877		0	1	0	1	#DIV/0!	#DIV/0!	#DIV/0!	#DIV/0!
Q8BRT1	Clasp2	CLIP-associating protein 2	328	SSSSSQESLNRPFSSK	monophos-(328)SSSSSQESLNRPFSSK					218943	467735											2	0	0	2	#DIV/0!	#DIV/0!	#DIV/0!	#DIV/0!
Q8BRT1	Clasp2	CLIP-associating protein 2	373	SRSDIDVNAAAGAK	monophos-(373)SRSDIDVNAAAGAK	1.71132e+06	2.4693e+06	2.61375e+06	1.64242e+06	2.09606e+06	1.25771e+06	634512	1.68944e+06	4.30612e+06	2.61171e+06	5.811e+06	1.27858e+06	1.25965e+06	1.87514e+06	2.58988e+06	62166.7	8	8	8	8	0.0127403	0.329822	0.117113	0.0416162
Q8BRT1	Clasp2	CLIP-associating protein 2	400	LGAGALNPGSYASLEDTSDKMDGTASDDGR	diphos-(400)LGAGALNPGSYASLEDTSDKMDGTASDDGR						122016								195093			1	1	0	2	#DIV/0!	#DIV/0!	#DIV/0!	#DIV/0!
Q8BRT1	Clasp2	CLIP-associating protein 2	400	LGAGALNPGSYASLEDTSDKMDGTASDDGR	monophos-(400)LGAGALNPGSYASLEDTSDKMDGTASDDGR						134162								382069			1	1	0	2	#DIV/0!	#DIV/0!	#DIV/0!	#DIV/0!
Q8BRT1	Clasp2	CLIP-associating protein 2	524	IPRPSVSQGCSR	monophos-(524)IPRPSVSQGCSR	106926										216570						1	1	2	0	#DIV/0!	#DIV/0!	#DIV/0!	#DIV/0!
Q8BRT1	Clasp2	CLIP-associating protein 2	575	VLNTGSDVEEAVADALLLGDIR	monophos-(575)VLNTGSDVEEAVADALLLGDIR				52896.4				53500.4			308312	59845.3				29543.6	2	3	3	2	0.00394905	0.463623	0.164097	0.430718
Q8BRT1	Clasp2	CLIP-associating protein 2	946	SQEDMSEPVRR	monophos-(946)SQEDMSEPVRR	231906							260227									2	0	1	1	#DIV/0!	#DIV/0!	#DIV/0!	#DIV/0!
Q8BRT1	Clasp2	CLIP-associating protein 2	961	EDGDTICSGPGMSDPRAGGDAADGSQPALDNK	monophos-(961)EDGDTICSGPGMSDPRAGGDAADGSQPALDNK											30764						0	1	1	0	#DIV/0!	#DIV/0!	#DIV/0!	#DIV/0!
Q8BRT1	Clasp2	CLIP-associating protein 2	993	ASLLHSMPLHSSPR	monophos-(993)ASLLHSMPLHSSPR								283992									1	0	0	1	#DIV/0!	#DIV/0!	#DIV/0!	#DIV/0!
O35454	Clcn6	Chloride transport protein 6	24	TPEELTILGETQEEEDEILPR	monophos-(24)TPEELTILGETQEEEDEILPR		41854.5								52712.3							1	1	2	0	#DIV/0!	#DIV/0!	#DIV/0!	#DIV/0!
Q60771	Cldn11	Claudin-11	189	FYYSSGSSSPTHAK	diphos-(189)FYYSSGSSSPTHAK		313523	1.06786e+06		421881								435234				3	1	2	2	#DIV/0!	#DIV/0!	0.022536	0.613326
Q60771	Cldn11	Claudin-11	189	FYYSSGSSSPTHAK	monophos-(189)FYYSSGSSSPTHAK		875444	580287	162156					985611	1.21791e+06	2.03379e+06		367949	449900			3	5	6	2	0.46463	0.314114	0.138664	0.275478
P0C7M9	Clec2l	C-type lectin domain family 2 member L	28	SPAEAEAR	monophos-(28)SPAEAEAR							7533.03	4982.96			4536.4	6546.6				6533.24	2	3	2	3	0.51875	0.783245	0.767745	0.553759
P0C7M9	Clec2l	C-type lectin domain family 2 member L	43	RSGSGYEGSTSWK	diphos-(43)RSGSGYEGSTSWK		247937									996478					393423	1	2	2	1	#DIV/0!	#DIV/0!	#DIV/0!	#DIV/0!
P0C7M9	Clec2l	C-type lectin domain family 2 member L	43	RSGSGYEGSTSWK	monophos-(43)RSGSGYEGSTSWK			253129														1	0	1	0	#DIV/0!	#DIV/0!	#DIV/0!	#DIV/0!
P0C7M9	Clec2l	C-type lectin domain family 2 member L	44	SGSGYEGSTSWK	diphos-(44)SGSGYEGSTSWK	349031	796745	581133	1.51622e+06	1.00371e+06	227292	3.1025e+06	1.51914e+06	758549		4.05464e+06	1.49303e+06	115854	494625	573708	2.72484e+06	8	7	7	8	0.28067	0.609351	0.78158	0.820195
P0C7M9	Clec2l	C-type lectin domain family 2 member L	44	SGSGYEGSTSWK	monophos-(44)SGSGYEGSTSWK	497476	689422	3.12478e+06	2.37642e+06	1.28827e+06	178831	1.13077e+06	7.84151e+06	322016		5.01491e+06	2.19667e+06	160611	602822	847464	4.10736e+06	8	7	7	8	0.5637	0.836097	0.291819	0.992036
P52194	Clgn	Calmegin	579	SGSEDEMKDADESPGSGDAPLK	diphos-(579)SGSEDEMKDADESPGSGDAPLK								264386									1	0	0	1	#DIV/0!	#DIV/0!	#DIV/0!	#DIV/0!
P52194	Clgn	Calmegin	579	SGSEDEMKDADESPGSGDAPLK	monophos-(579)SGSEDEMKDADESPGSGDAPLK								498888									1	0	0	1	#DIV/0!	#DIV/0!	#DIV/0!	#DIV/0!
Q9QYB1	Clic4	Chloride intracellular channel protein 4	150	LDEYLNSPLPDEIDENSMEDIK	monophos-(150)LDEYLNSPLPDEIDENSMEDIK											129263						0	1	1	0	#DIV/0!	#DIV/0!	#DIV/0!	#DIV/0!
Q922J3	Clip1	CAP-Gly domain-containing linker protein 1	189	TASESISNLSEAGSVK	diphos-(189)TASESISNLSEAGSVK					1.37147e+07	395912		1.25734e+06						382883			3	1	0	4	#DIV/0!	#DIV/0!	#DIV/0!	#DIV/0!
Q922J3	Clip1	CAP-Gly domain-containing linker protein 1	189	TASESISNLSEAGSVK	monophos-(189)TASESISNLSEAGSVK	161161	279948				106807		182466	243511	460261				84396.2			4	3	4	3	0.15338	0.462178	0.290969	0.0951025
Q922J3	Clip1	CAP-Gly domain-containing linker protein 1	344	KISGTTALQEALK	monophos-(344)KISGTTALQEALK		249584				149867		295745									3	0	1	2	#DIV/0!	#DIV/0!	#DIV/0!	#DIV/0!
Q9Z0H8	Clip2	CAP-Gly domain-containing linker protein 2	47	QASGPSSSGAATTVSEKPGPK	monophos-(47)QASGPSSSGAATTVSEKPGPK	289769	474789	540070		229120		426110	282250	384061	411620	718036			94218.1		1.04452e+06	6	5	6	5	0.037126	0.399939	0.0692244	0.747536
Q9Z0H8	Clip2	CAP-Gly domain-containing linker protein 2	198	TGNESGSNLSDSGSVKR	diphos-(198)TGNESGSNLSDSGSVKR		64856.5															1	0	1	0	#DIV/0!	#DIV/0!	#DIV/0!	#DIV/0!
Q9Z0H8	Clip2	CAP-Gly domain-containing linker protein 2	288	IGFPSTSPAK	monophos-(288)IGFPSTSPAK	356348	638992	1.59554e+06	1.46436e+06	148640	399782	1.06955e+06	1.53626e+06	1.03418e+06	906518	512793	895024		264490	919734	1.33855e+06	8	7	8	7	0.230154	0.810321	0.565937	0.658998
Q9Z0H8	Clip2	CAP-Gly domain-containing linker protein 2	350	KISGTTALQEALK	monophos-(350)KISGTTALQEALK		249584				149867		295745									3	0	1	2	#DIV/0!	#DIV/0!	#DIV/0!	#DIV/0!
Q9Z0H8	Clip2	CAP-Gly domain-containing linker protein 2	914	VLLLEANRHSPGPER	monophos-(914)VLLLEANRHSPGPER	298159		404735					619735									3	0	2	1	#DIV/0!	#DIV/0!	#DIV/0!	#DIV/0!
Q9Z0H8	Clip2	CAP-Gly domain-containing linker protein 2	971	RYSLIDPASPPELLK	monophos-(971)RYSLIDPASPPELLK	148213	233335	207280	313525		123262	366310	545866	208590		441051				464540	433837	7	4	6	5	0.796458	0.23484	0.366712	0.144472
O08585	Clta	Clathrin light chain A	101	LQSEPESIRK	monophos-(101)LQSEPESIRK	213424	212860								188530	356751	263975			250139	401770	2	5	5	2	0.0069668	0.108471	0.3713	0.274773
O08585	Clta	Clathrin light chain A	169	QPFADLIGYVAAEEAFVNDIDESSPGTEWER	monophos-(169)QPFADLIGYVAAEEAFVNDIDESSPGTEWER											39766.6						0	1	1	0	#DIV/0!	#DIV/0!	#DIV/0!	#DIV/0!
Q9D4C9	Clvs1	Clavesin-1	285	TLLGPDYSDENDYTHTSYNAMHVKHTCSNLER	monophos-(285)TLLGPDYSDENDYTHTSYNAMHVKHTCSNLER		324771															1	0	1	0	#DIV/0!	#DIV/0!	#DIV/0!	#DIV/0!
Q9D4C9	Clvs1	Clavesin-1	326	SQSVVEAGTLKHEEK	monophos-(326)SQSVVEAGTLKHEEK	460168	1.08643e+06	1.5961e+06	1.03552e+06	611681	206888	1.81125e+06	1.06513e+06	557252	645580	1.80185e+06	879698	193755	240429	1.0342e+06	1.63911e+06	8	8	8	8	0.826428	0.706009	0.467	0.588576
Q8BG92	Clvs2	Clavesin-2	286	DVDKELSPK	monophos-(286)DVDKELSPK	275707	452353	1.15219e+06	860893		63856.2	526114			1.10262e+06	2.30632e+06	824922		126857		894579	6	5	7	4	0.15963	0.208551	0.40818	0.138948
Q8BG92	Clvs2	Clavesin-2	299	SQSVVDPTALKR	monophos-(299)SQSVVDPTALKR	535088	726570	1.45414e+06	710570	1.91346e+06	223694	4.32552e+06	788484	459204	444371	3.9797e+06	1.22366e+06	417340	378103	761071	1.29068e+06	8	8	8	8	0.825346	0.739061	0.730812	0.913192
Q8CHQ9	Cml2	Probable N-acetyltransferase CML2	165	DQGYSDVVLETGSVQHSAQALYQAMGFQKTGQYFVSISK	monophos-(165)DQGYSDVVLETGSVQHSAQALYQAMGFQKTGQYFVSISK										384824		1.3731e+06					0	2	2	0	#DIV/0!	#DIV/0!	#DIV/0!	#DIV/0!
Q8CJ61	Cmtm4	CKLF-like MARVEL transmembrane domain-containing protein 4	191	TESRDVDSRPEIQR	monophos-(191)TESRDVDSRPEIQR		1.45054e+06	434604							526263	836389						2	2	4	0	0.377233	0.671488	#DIV/0!	#DIV/0!
Q8CJ61	Cmtm4	CKLF-like MARVEL transmembrane domain-containing protein 4	195	DVDSRPEIQRLDT	monophos-(195)DVDSRPEIQRLDT			222767								217277						1	1	2	0	#DIV/0!	#DIV/0!	#DIV/0!	#DIV/0!
Q80YA9	Cnksr2	Connector enhancer of kinase suppressor of ras 2	324	SPTSSVATPSSTISTPTKR	diphos-(324)SPTSSVATPSSTISTPTKR						363393											1	0	0	1	#DIV/0!	#DIV/0!	#DIV/0!	#DIV/0!
Q80YA9	Cnksr2	Connector enhancer of kinase suppressor of ras 2	324	SPTSSVATPSSTISTPTKR	monophos-(324)SPTSSVATPSSTISTPTKR		232515				85823.4											2	0	1	1	#DIV/0!	#DIV/0!	#DIV/0!	#DIV/0!
Q80YA9	Cnksr2	Connector enhancer of kinase suppressor of ras 2	386	GSESPNSFLDQEYRK	monophos-(386)GSESPNSFLDQEYRK	1.46363e+06	3.38996e+06	1.4936e+06	1.56981e+06	1.69911e+06	2.91258e+06	1.21972e+06	768848	1.38032e+06	2.62632e+06	1.28087e+06	2.85776e+06	677187	2.17726e+06	2.40328e+06	3.20369e+06	8	8	8	8	0.989007	0.561695	0.702254	0.78211
Q80YA9	Cnksr2	Connector enhancer of kinase suppressor of ras 2	502	SNSPAHYSLLPSLQMDALR	monophos-(502)SNSPAHYSLLPSLQMDALR				460335							161564	166563					1	2	3	0	#DIV/0!	#DIV/0!	#DIV/0!	#DIV/0!
Q80YA9	Cnksr2	Connector enhancer of kinase suppressor of ras 2	678	QEQDYWSESDKEEADTPSTPK	diphos-(678)QEQDYWSESDKEEADTPSTPK											249187						0	1	1	0	#DIV/0!	#DIV/0!	#DIV/0!	#DIV/0!
Q80YA9	Cnksr2	Connector enhancer of kinase suppressor of ras 2	746	QEVTGSSAVSPIRK	monophos-(746)QEVTGSSAVSPIRK	137043	217934													188068		2	1	2	1	#DIV/0!	#DIV/0!	#DIV/0!	#DIV/0!
Q80YA9	Cnksr2	Connector enhancer of kinase suppressor of ras 2	843	SFTLPR	monophos-(843)SFTLPR				150622													1	0	1	0	#DIV/0!	#DIV/0!	#DIV/0!	#DIV/0!
Q80YA9	Cnksr2	Connector enhancer of kinase suppressor of ras 2	902	LGDSLQDLYR	monophos-(902)LGDSLQDLYR	363150	483368	824752	1.07204e+06	437862	237847	1.40576e+06	857598	501097	585416	715082	790591	189457	238671	862115	1.59917e+06	8	8	8	8	0.797781	0.906883	0.0344685	0.775767
Q0GA42	Cnnm1	Metal transporter CNNM1	819	GTPQTPKDDPVLTLLSNR	diphos-(819)GTPQTPKDDPVLTLLSNR	172604	182181	729417					412019	309699			518227	393265	280531	1.31149e+06		4	5	5	4	0.442873	0.468091	0.213125	0.400759
Q8C5L3	Cnot2	CCR4-NOT transcription complex subunit 2	154	TNSMSSSGLGSPNR	monophos-(154)TNSMSSSGLGSPNR	173157	156104			191467	132131			231513								4	1	3	2	#DIV/0!	#DIV/0!	0.799753	0.544254
P16330	Cnp	2',3'-cyclic-nucleotide 3'-phosphodiesterase	8	SHTFLPK	monophos-(8)SHTFLPK	411702	1.18625e+06	1.5841e+06	1.84156e+06	626510	280015	3.50501e+06	3.0275e+06	471887	256365	3.78005e+06	1.33525e+06	391826	988889	1.00475e+06	2.11149e+06	8	8	8	8	0.959345	0.66056	0.832421	0.825417
P16330	Cnp	2',3'-cyclic-nucleotide 3'-phosphodiesterase	19	KMSSSGAK	monophos-(19)KMSSSGAK		4820.4					12277.2				1395.64					12123.8	2	2	2	2	0.773374	0.809876	0.0569868	0.0337505
P16330	Cnp	2',3'-cyclic-nucleotide 3'-phosphodiesterase	163	NQWQLSADDLKK	monophos-(163)NQWQLSADDLKK	678809	539115	830822	600294	435643	215852	2.55098e+06	1.53422e+06	785818	323115	4.12273e+06	1.00802e+06	283813	380066	888692	1.31445e+06	8	8	8	8	0.209749	0.68585	0.291478	0.762942
P16330	Cnp	2',3'-cyclic-nucleotide 3'-phosphodiesterase	399	GKPVPIHGSR	monophos-(399)GKPVPIHGSR				324872		58498				7280.17		407745		56578.8		256367	2	4	3	3	0.767441	0.954882	0.455512	0.426464
P47746	Cnr1	Cannabinoid receptor 1	312	GTQKSIIIHTSEDGK	diphos-(312)GTQKSIIIHTSEDGK	4.39254e+06	3.23992e+06	1.07444e+06	6.7551e+06	725777	294027			9.11339e+06	3.79027e+06	9.4425e+06		621500	348426			6	5	7	4	0.250221	0.389521	0.000912294	0.00599278
P47746	Cnr1	Cannabinoid receptor 1	312	GTQKSIIIHTSEDGK	monophos-(312)GTQKSIIIHTSEDGK			672382		221313								483379				2	1	1	2	#DIV/0!	#DIV/0!	#DIV/0!	#DIV/0!
P47746	Cnr1	Cannabinoid receptor 1	316	SIIIHTSEDGK	monophos-(316)SIIIHTSEDGK	524570	2.00575e+06	1.05186e+06	653175	1.18984e+06	426624	804057		1.57223e+06	2.20744e+06	662373			190196	765541		7	5	7	5	0.367353	0.745092	0.274066	0.131566
P12960	Cntn1	Contactin-1	979	AHSDGGDGVVSQVK	monophos-(979)AHSDGGDGVVSQVK													270139				0	1	0	1	#DIV/0!	#DIV/0!	#DIV/0!	#DIV/0!
O54991	Cntnap1	Contactin-associated protein 1	1371	DQNLPQILEESRSE	monophos-(1371)DQNLPQILEESRSE	442387	538686	1.02397e+06					740453		769332	775028	1.38201e+06	1.07137e+06			839741	4	5	6	3	0.985727	0.151142	0.419707	0.780631
Q9CPW0	Cntnap2	Contactin-associated protein-like 2	603	HLGQTSNYYWIDPDGSGPLGPLK	diphos-(603)HLGQTSNYYWIDPDGSGPLGPLK									236166								0	1	1	0	#DIV/0!	#DIV/0!	#DIV/0!	#DIV/0!
Q9CPW0	Cntnap2	Contactin-associated protein-like 2	1300	GAESAESADAAIMNNDPNFTETIDESKK	diphos-(1300)GAESAESADAAIMNNDPNFTETIDESKK	192064	468177			547031	284809	418824	243936	549134	565470	724364			691742	352510	554644	6	6	5	7	0.899856	0.0211919	0.652696	0.587514
Q9EQG9	Col4a3bp	Collagen type IV alpha-3-binding protein	374	SSSMSSIDLVSASDDVHR	diphos-(374)SSSMSSIDLVSASDDVHR															162842		0	1	0	1	#DIV/0!	#DIV/0!	#DIV/0!	#DIV/0!
O88587	Comt	Catechol O-methyltransferase	252	AVYQGPGSSPVKS	monophos-(252)AVYQGPGSSPVKS	1.53207e+06	2.06922e+06	2.30109e+06	4.74099e+06	1.79364e+06	408993	9.60351e+06	1.09908e+06	2.20539e+06	1.51594e+06	6.23487e+06	3.83856e+06	343740	519269	3.10102e+06	6.23072e+06	8	8	8	8	0.527783	0.967612	0.0962679	0.901903
O55029	Copb2	Coatomer subunit beta'	384	NKSFGSAQEFAWAHDSSEYAIR	diphos-(384)NKSFGSAQEFAWAHDSSEYAIR										1.55774e+06							0	1	1	0	#DIV/0!	#DIV/0!	#DIV/0!	#DIV/0!
O88543	Cops3	COP9 signalosome complex subunit 3	406	SMGSQEDDSGNKPSSYS	monophos-(406)SMGSQEDDSGNKPSSYS	238015	248646	550200		194346				158236	95173.1				184982			4	3	5	2	0.149499	0.163884	0.0567746	0.623641
O35864	Cops5	COP9 signalosome complex subunit 5	282	GSFMLGLETHDR	monophos-(282)GSFMLGLETHDR		129467			248369		496073										3	0	1	2	#DIV/0!	#DIV/0!	#DIV/0!	#DIV/0!
Q8K1Z0	Coq9	Ubiquinone biosynthesis protein COQ9, mitochondrial	76	YTDQSGEEEEDYESEEQLQHR	monophos-(76)YTDQSGEEEEDYESEEQLQHR	295659	612490	1.21215e+06	856986	628006	203935	451796		625843	549198	1.55909e+06	510731		226825	627466		7	6	8	5	0.520961	0.742926	0.19466	0.111116
Q9D2V7	Coro7	Coronin-7	900	LGNREDPLPQDSFEGVDEDEWD	monophos-(900)LGNREDPLPQDSFEGVDEDEWD			985592				1.33476e+06	406150						224062	215791		3	2	1	4	0.0176337	0.12594	#DIV/0!	#DIV/0!
P19783	Cox4i1	Cytochrome c oxidase subunit 4 isoform 1, mitochondrial	42	DYPLPDVAHVTMLSASQK	monophos-(42)DYPLPDVAHVTMLSASQK			203455				496795	202391									3	0	1	2	#DIV/0!	#DIV/0!	#DIV/0!	#DIV/0!
O89001	Cpd	Carboxypeptidase D	1354	SLLSHEFQDETDTEEETLYSSK	diphos-(1354)SLLSHEFQDETDTEEETLYSSK	530366		1.78881e+06	474995		499499	532286	972215			2.56534e+06	413042	765026	465763	288469	526837	6	6	5	7	0.291031	0.9286	0.00291271	0.259435
Q7TN99	Cpeb3	Cytoplasmic polyadenylation element-binding protein 3	418	SSLFPFEDAFLDDSHGDQALSSGLSSPTR	monophos-(418)SSLFPFEDAFLDDSHGDQALSSGLSSPTR		28329.6	382051					136139			116116						3	1	3	1	#DIV/0!	#DIV/0!	#DIV/0!	#DIV/0!
P84086	Cplx2	Complexin-2	83	AALEQPCEGSLTRPK	monophos-(83)AALEQPCEGSLTRPK		237429										74326.2					1	1	2	0	#DIV/0!	#DIV/0!	#DIV/0!	#DIV/0!
Q8JZW4	Cpne5	Copine-5	93	FDLYDVDSKSPDLSK	monophos-(93)FDLYDVDSKSPDLSK		528613							163551								1	1	2	0	#DIV/0!	#DIV/0!	#DIV/0!	#DIV/0!
Q9Z140	Cpne6	Copine-6	64	SCSSPVFSR	monophos-(64)SCSSPVFSR	385088	785668	1.16514e+06		521311	136471			830144	707179	1.81323e+06		157261	170894		514833	5	6	6	5	0.416276	0.760087	0.104408	0.0227992
Q9Z140	Cpne6	Copine-6	321	SSQSLHCLSPR	monophos-(321)SSQSLHCLSPR	512069	835324	846881		1.38904e+06	435183	1.37683e+06	718311	1.05509e+06	540834	1.13401e+06	1.18247e+06	571137		1.77021e+06	1.43395e+06	7	7	7	7	0.731582	0.326701	0.143346	0.322252
Q9Z140	Cpne6	Copine-6	528	QVVEYYASQGISPGAPRPSTPAMTPSPSP	diphos-(528)QVVEYYASQGISPGAPRPSTPAMTPSPSP	133273	296536	2.99129e+06	1.52735e+06	1.61052e+06	323430	776871	1.43299e+06	387970	237276	1.95376e+06	1.94261e+06	633263	414789		1.64449e+06	8	7	8	7	0.632415	0.819525	0.148596	0.654564
Q8BTV2	Cpsf7	Cleavage and polyadenylation specificity factor subunit 7	192	DSSDSADGRATPSENLVPSSAR	monophos-(192)DSSDSADGRATPSENLVPSSAR			538628						466239	331975							1	2	3	0	#DIV/0!	#DIV/0!	#DIV/0!	#DIV/0!
Q91ZR3	Crebzf	CREB/ATF bZIP transcription factor	120	QPDWHLEPGLSSPGPLSSSGGGSESGGLLRGDDDDDTAAAEMQR	monophos-(120)QPDWHLEPGLSSPGPLSSSGGGSESGGLLRGDDDDDTAAAEMQR															143662		0	1	0	1	#DIV/0!	#DIV/0!	#DIV/0!	#DIV/0!
P35347	Crhr1	Corticotropin-releasing factor receptor 1	393	AMSIPTSPTR	diphos-(393)AMSIPTSPTR					377869												1	0	0	1	#DIV/0!	#DIV/0!	#DIV/0!	#DIV/0!
Q60748	Crhr2	Corticotropin-releasing factor receptor 2	389	AMSIPTSPTR	diphos-(389)AMSIPTSPTR					377869												1	0	0	1	#DIV/0!	#DIV/0!	#DIV/0!	#DIV/0!
Q9DCT8	Crip2	Cysteine-rich protein 2	108	GPSKASSVTTFTGEPNMCPR	diphos-(108)GPSKASSVTTFTGEPNMCPR				881187					150194								1	1	2	0	#DIV/0!	#DIV/0!	#DIV/0!	#DIV/0!
Q9DCT8	Crip2	Cysteine-rich protein 2	112	ASSVTTFTGEPNMCPR	monophos-(112)ASSVTTFTGEPNMCPR	366637	1.16497e+06	834069	787539		496831	1.89729e+06	474082	245863	251622	1.41846e+06	289183		443274	721161	206310	7	7	8	6	0.648813	0.204774	0.468114	0.898643
Q64010	Crk	Adapter molecule crk	31	HGVFLVRDSSTSPGDYVLSVSENSR	monophos-(31)HGVFLVRDSSTSPGDYVLSVSENSR					163289												1	0	0	1	#DIV/0!	#DIV/0!	#DIV/0!	#DIV/0!
Q64010	Crk	Adapter molecule crk	38	DSSTSPGDYVLSVSENSR	monophos-(38)DSSTSPGDYVLSVSENSR	1.83496e+06	2.37019e+06	5.09914e+06	2.19881e+06	3.07487e+06	1.04432e+06	2.96394e+06	2.74281e+06	2.91712e+06	1789100	1.10108e+07	1.85267e+06	1.732e+06	1.41524e+06	1.1818e+06	4.48266e+06	8	8	8	8	0.0149868	0.62225	0.0191046	0.305035
P47941	Crkl	Crk-like protein	39	DSSTCPGDYVLSVSENSR	monophos-(39)DSSTCPGDYVLSVSENSR	233084	430496	280460	76414.6	730400	236561		217469	474217	409594	1.49713e+06	203315	306200	429825	278621	273309	7	8	8	7	0.113799	0.353566	0.0430065	0.581867
P47941	Crkl	Crk-like protein	104	YPSPPVGSVSAPNLPTAEENLEYVR	monophos-(104)YPSPPVGSVSAPNLPTAEENLEYVR					573676						177397	322309	234489				1	3	2	2	#DIV/0!	#DIV/0!	0.514084	0.490995
P97427	Crmp1	Dihydropyrimidinase-related protein 1	6	KSIPHITSDR	monophos-(6)KSIPHITSDR	7.73377e+06	1.34935e+07	1.6241e+07	1.00669e+07	1.12991e+07	5.03361e+06	4.35031e+07	2.29208e+07	1.51796e+07	1.46472e+07	1.86155e+07	1.79319e+07	6.44974e+06	4.61636e+06	1.97792e+07	2.3706e+07	8	8	8	8	0.120054	0.815463	0.00352102	0.564566
P97427	Crmp1	Dihydropyrimidinase-related protein 1	487	VFGLHSVSR	monophos-(487)VFGLHSVSR					118880												1	0	0	1	#DIV/0!	#DIV/0!	#DIV/0!	#DIV/0!
P97427	Crmp1	Dihydropyrimidinase-related protein 1	496	GMYDGPVYEVPATPK	monophos-(496)GMYDGPVYEVPATPK	4.35415e+06	5.2755e+06	6.27542e+06	4.73187e+06	4.44178e+06	2.96374e+06	1.24e+07	5.95523e+06	7.80667e+06	6.87341e+06	5.71956e+06	8.38507e+06	3.26404e+06	2.7861e+06	5922700	9.85461e+06	8	8	8	8	0.685307	0.697667	0.0321076	0.867315
P97427	Crmp1	Dihydropyrimidinase-related protein 1	511	HAAPAPSAKSSPSK	diphos-(511)HAAPAPSAKSSPSK			11192.7			41211.6		10377.2		11360.4			5585.48	317940		28780.8	3	4	2	5	0.0265473	0.425652	0.00133391	0.308586
P97427	Crmp1	Dihydropyrimidinase-related protein 1	511	HAAPAPSAK	monophos-(511)HAAPAPSAK	299887	1.26034e+06		8.30176e+06	5.57186e+06	3.83406e+06	7.61801e+06	328609	6.22385e+06	2.64161e+06	1.39689e+07	3.05194e+07	7.15935e+06	4.60674e+06	3.74473e+06	2.5905e+07	7	8	7	8	0.0119706	0.0799069	0.449567	0.729301
P97427	Crmp1	Dihydropyrimidinase-related protein 1	532	NLHQSNFSLSGAQIDDNNPRR	diphos-(532)NLHQSNFSLSGAQIDDNNPRR	1.135e+06	1.24437e+06	2.80625e+06	1.2725e+06	490800	972360	1.12932e+06	1.49198e+06	725041	518587	1.54267e+06	910143	652233	647704	1.12914e+06	1.02568e+06	8	8	8	8	0.0878692	0.130854	0.0630823	0.252369
P97427	Crmp1	Dihydropyrimidinase-related protein 1	532	NLHQSNFSLSGAQIDDNNPR	monophos-(532)NLHQSNFSLSGAQIDDNNPR	6.47575e+06	5.58103e+06	9.83663e+06	2.65357e+06	1.93009e+06	2.59849e+06	7.05915e+06	3.52582e+06	7.03609e+06	5.0117e+06	5.79712e+06	1.88252e+06	1.94236e+06	2.83756e+06	2.56617e+06	6.19267e+06	8	8	8	8	0.475513	0.522635	0.538235	0.103735
P97427	Crmp1	Dihydropyrimidinase-related protein 1	557	IVAPPGGRSNITSLG	diphos-(557)IVAPPGGRSNITSLG	821607	2.17373e+06	3.73259e+06				1.41328e+07		817055			2.7534e+06					4	2	5	1	0.328316	0.496054	#DIV/0!	#DIV/0!
Q8CJ40	Crocc	Rootletin	493	TPTPPRHSPGR	diphos-(493)TPTPPRHSPGR								98946.1									1	0	0	1	#DIV/0!	#DIV/0!	#DIV/0!	#DIV/0!
Q8CJ40	Crocc	Rootletin	1478	SQPPSPGLIASPAPPDLDPEAVR	diphos-(1478)SQPPSPGLIASPAPPDLDPEAVR								251327									1	0	0	1	#DIV/0!	#DIV/0!	#DIV/0!	#DIV/0!
Q91X84	Crtc3	CREB-regulated transcription coactivator 3	347	CHPQPSVANASALHPSLRLFSLSNPSLSTTNLSGPSR	diphos-(347)CHPQPSVANASALHPSLRLFSLSNPSLSTTNLSGPSR		235696															1	0	1	0	#DIV/0!	#DIV/0!	#DIV/0!	#DIV/0!
P23927	Cryab	Alpha-crystallin B chain	56	APSWIDTGLSEMR	monophos-(56)APSWIDTGLSEMR					117966		320197	254677								490221	3	1	0	4	#DIV/0!	#DIV/0!	#DIV/0!	#DIV/0!
P41241	Csk	Tyrosine-protein kinase CSK	17	YNFHGTAEQDLPFCK	monophos-(17)YNFHGTAEQDLPFCK											922378						0	1	1	0	#DIV/0!	#DIV/0!	#DIV/0!	#DIV/0!
Q8BK63	Csnk1a1	Casein kinase I isoform alpha	304	AAQQAASSSGQGQQAQTPTGK	monophos-(304)AAQQAASSSGQGQQAQTPTGK	48875.3	29677.2								84366.6							2	1	3	0	#DIV/0!	#DIV/0!	#DIV/0!	#DIV/0!
Q9DC28	Csnk1d	Casein kinase I isoform delta	375	GAPVNVSSSDLTGR	monophos-(375)GAPVNVSSSDLTGR	92333.3								193920								1	1	2	0	#DIV/0!	#DIV/0!	#DIV/0!	#DIV/0!
Q9JMK2	Csnk1e	Casein kinase I isoform epsilon	382	GAPANVSSSDLTGR	monophos-(382)GAPANVSSSDLTGR		179048								200607							1	1	2	0	#DIV/0!	#DIV/0!	#DIV/0!	#DIV/0!
Q8C4X2	Csnk1g3	Casein kinase I isoform gamma-3	27	GTGSSSSGVLMVGPNFR	monophos-(27)GTGSSSSGVLMVGPNFR			168904														1	0	1	0	#DIV/0!	#DIV/0!	#DIV/0!	#DIV/0!
Q8C4X2	Csnk1g3	Casein kinase I isoform gamma-3	329	QLPTPVGAVQQDPALSSNR	monophos-(329)QLPTPVGAVQQDPALSSNR	155532	414536	492340			113963		365784	118443							229472	5	2	4	3	0.680053	0.339109	0.659955	0.65982
Q71M36	Cspg5	Chondroitin sulfate proteoglycan 5	529	LKEEESFNIQNSMSPK	monophos-(529)LKEEESFNIQNSMSPK					500193		97517.8									171510	2	1	0	3	#DIV/0!	#DIV/0!	#DIV/0!	#DIV/0!
P97315	Csrp1	Cysteine and glycine-rich protein 1	91	HEEAPGHRPTTNPNASK	monophos-(91)HEEAPGHRPTTNPNASK					2119.33												1	0	0	1	#DIV/0!	#DIV/0!	#DIV/0!	#DIV/0!
P97315	Csrp1	Cysteine and glycine-rich protein 1	178	GFGFGQGAGALVHSE	monophos-(178)GFGFGQGAGALVHSE	147620	259190	508626	690826	678674	165517	1.73856e+06	580609	253091		653858	979879	264878	135708	707183	973729	8	7	7	8	0.378249	0.900593	0.186165	0.500621
Q99LI7	Cstf3	Cleavage stimulation factor subunit 3	685	RPNEDSDEDEEKGAVVPPVHDIYR	monophos-(685)RPNEDSDEDEEKGAVVPPVHDIYR			722881														1	0	1	0	#DIV/0!	#DIV/0!	#DIV/0!	#DIV/0!
Q7TSG2	Ctdp1	RNA polymerase II subunit A C-terminal domain phosphatase	842	EDLESMDKEVDDILGEGSDDSDIEK	diphos-(842)EDLESMDKEVDDILGEGSDDSDIEK			479464	271075			309782	299357						192103		297687	4	2	2	4	0.974019	0.289371	0.15236	0.257068
P26231	Ctnna1	Catenin alpha-1	551	VIHVVTSEMDNYEPGVYTEK	monophos-(551)VIHVVTSEMDNYEPGVYTEK															112856		0	1	0	1	#DIV/0!	#DIV/0!	#DIV/0!	#DIV/0!
P26231	Ctnna1	Catenin alpha-1	633	TPEELDDSDFETEDFDVR	monophos-(633)TPEELDDSDFETEDFDVR	11511	414853	1.80975e+06	2.16753e+06	351911	581019	1.40222e+06	3.19306e+06	124648	626989	1.30124e+06	1.67798e+06	416870	516087	2.65147e+06	3.23714e+06	8	8	8	8	0.940389	0.891262	0.270467	0.34532
P26231	Ctnna1	Catenin alpha-1	651	SRTSVQTEDDQLIAGQSAR	diphos-(651)SRTSVQTEDDQLIAGQSAR	6.34279e+06	6.63701e+06	1.26048e+07	7.09983e+06	6.15831e+06	2.75304e+06	1.35339e+07	5.29847e+06	1.09893e+07	7.68496e+06	1.43091e+07	1.49244e+07	1.5187e+06	3.98022e+06	5.4042e+06	6.66852e+06	8	8	8	8	0.482844	0.772548	0.967468	0.0278501
P26231	Ctnna1	Catenin alpha-1	651	SRTSVQTEDDQLIAGQSAR	monophos-(651)SRTSVQTEDDQLIAGQSAR	904387	667271	857135	185699		207074		322764	2.77723e+06	628445	1.15892e+06		220334	591319			6	5	7	4	0.0291548	0.297132	0.0289646	0.0722368
P26231	Ctnna1	Catenin alpha-1	653	TSVQTEDDQLIAGQSAR	diphos-(653)TSVQTEDDQLIAGQSAR	561406	403379	354915	761057	231460	221720	1.08299e+06	987310	604844	1.12034e+06	454148	391487	274032	256527	1.01441e+06	787330	8	8	8	8	0.975915	0.8255	0.274998	0.880325
P26231	Ctnna1	Catenin alpha-1	653	TSVQTEDDQLIAGQSAR	monophos-(653)TSVQTEDDQLIAGQSAR					108702				219444						238667		1	2	1	2	#DIV/0!	#DIV/0!	#DIV/0!	#DIV/0!
Q61301	Ctnna2	Catenin alpha-2	245	QVQEAIAGISSAAQATSPTDEAK	monophos-(245)QVQEAIAGISSAAQATSPTDEAK	904302	1.49665e+06	5.21534e+06	522562	2.23494e+06	307035	5.9964e+06	907283	6.25086e+06	1953924	7.13041e+06	5.4868e+06	316787	286498	6.11656e+06	8.36268e+06	8	8	8	8	0.354586	0.115004	0.607064	0.7149
Q61301	Ctnna2	Catenin alpha-2	625	AVLMIRTPEELEDDSDFEQEDYDVR	diphos-(625)AVLMIRTPEELEDDSDFEQEDYDVR				656826		60747						937012		58591.1			2	2	2	2	0.759112	0.817902	0.00979708	0.119528
Q61301	Ctnna2	Catenin alpha-2	625	AVLMIRTPEELEDDSDFEQEDYDVR	monophos-(625)AVLMIRTPEELEDDSDFEQEDYDVR			94701.7					4.87261e+06									2	0	1	1	#DIV/0!	#DIV/0!	#DIV/0!	#DIV/0!
Q61301	Ctnna2	Catenin alpha-2	631	TPEELEDDSDFEQEDYDVRSR	diphos-(631)TPEELEDDSDFEQEDYDVRSR														382169			0	1	0	1	#DIV/0!	#DIV/0!	#DIV/0!	#DIV/0!
Q61301	Ctnna2	Catenin alpha-2	631	TPEELEDDSDFEQEDYDVR	monophos-(631)TPEELEDDSDFEQEDYDVR	78544.9	2.13665e+06	1.0689e+07	1.17514e+07	1.96855e+06	3.85213e+06	1.85608e+07	9.48691e+06	160273	3.99918e+06	6.72806e+06	1.10416e+07	2.62615e+06	3.05061e+06	9.62003e+06	1.72464e+07	8	8	8	8	0.744885	0.867898	0.445919	0.410042
Q61301	Ctnna2	Catenin alpha-2	650	SRTSVQTEDDQLIAGQSAR	diphos-(650)SRTSVQTEDDQLIAGQSAR	6.34279e+06	6.63701e+06	1.26048e+07	7.09983e+06	6.15831e+06	2.75304e+06	1.35339e+07	5.29847e+06	1.09893e+07	7.68496e+06	1.43091e+07	1.49244e+07	1.5187e+06	3.98022e+06	5.4042e+06	6.66852e+06	8	8	8	8	0.482844	0.772548	0.967468	0.0278501
Q61301	Ctnna2	Catenin alpha-2	650	SRTSVQTEDDQLIAGQSAR	monophos-(650)SRTSVQTEDDQLIAGQSAR	904387	667271	857135	185699		207074		322764	2.77723e+06	628445	1.15892e+06		220334	591319			6	5	7	4	0.0291548	0.297132	0.0289646	0.0722368
Q61301	Ctnna2	Catenin alpha-2	652	TSVQTEDDQLIAGQSAR	diphos-(652)TSVQTEDDQLIAGQSAR	561406	403379	354915	761057	231460	221720	1.08299e+06	987310	604844	1.12034e+06	454148	391487	274032	256527	1.01441e+06	787330	8	8	8	8	0.975915	0.8255	0.274998	0.880325
Q61301	Ctnna2	Catenin alpha-2	652	TSVQTEDDQLIAGQSAR	monophos-(652)TSVQTEDDQLIAGQSAR					108702				219444						238667		1	2	1	2	#DIV/0!	#DIV/0!	#DIV/0!	#DIV/0!
Q61301	Ctnna2	Catenin alpha-2	936	HISPVQALSEFK	monophos-(936)HISPVQALSEFK	311481	258506	432108	800597		189224	508288	481369	308258	259546	514268	728616	158561	124717	878761	831681	7	8	8	7	0.339192	0.721562	0.331371	0.991104
Q02248	Ctnnb1	Catenin beta-1	549	RTSMGGTQQQFVEGVR	monophos-(549)RTSMGGTQQQFVEGVR	1.96542e+06	5.47548e+06	9.47618e+06	3.50072e+06	4.20355e+06	720607	7.18832e+06	2.92272e+06	5.76454e+06	8.01038e+06	4.87294e+06	3.64195e+06	3.35646e+06	1.29272e+06	1.54047e+06	1.98247e+06	8	8	8	8	0.595012	0.639054	0.671278	0.0504145
P30999	Ctnnd1	Catenin delta-1	264	VGGSSVDLHR	monophos-(264)VGGSSVDLHR	100411																1	0	1	0	#DIV/0!	#DIV/0!	#DIV/0!	#DIV/0!
P30999	Ctnnd1	Catenin delta-1	287	SMGYDDLDYGMMSDYGTAR	monophos-(287)SMGYDDLDYGMMSDYGTAR	50023.3	126365						338159							198516	209298	3	2	2	3	0.0721796	0.790065	0.881868	0.0887275
P30999	Ctnnd1	Catenin delta-1	344	GSLASLDSLRK	diphos-(344)GSLASLDSLRK	348279	624370			405067	312010								681725	1.64781e+06		4	2	2	4	0.032889	0.363086	0.459217	0.586548
P30999	Ctnnd1	Catenin delta-1	344	GSLASLDSLRK	monophos-(344)GSLASLDSLRK						49056.9		128452							307181		2	1	0	3	#DIV/0!	#DIV/0!	#DIV/0!	#DIV/0!
P30999	Ctnnd1	Catenin delta-1	633	KPTEDPANDTVDFPK	monophos-(633)KPTEDPANDTVDFPK	201315														56774		1	1	1	1	#DIV/0!	#DIV/0!	#DIV/0!	#DIV/0!
P30999	Ctnnd1	Catenin delta-1	858	SQSSHSYDDSTLPLIDR	diphos-(858)SQSSHSYDDSTLPLIDR														85266.1			0	1	0	1	#DIV/0!	#DIV/0!	#DIV/0!	#DIV/0!
O35927	Ctnnd2	Catenin delta-2	4	KQSGAAPFGAMPVPDQPPSASEK	monophos-(4)KQSGAAPFGAMPVPDQPPSASEK					968330	527194		2.6557e+06					1.49641e+06	1.80113e+06	980442		3	3	0	6	0.240004	0.954203	#DIV/0!	#DIV/0!
O35927	Ctnnd2	Catenin delta-2	27	NSSLSPGLNTSNGDGSETETTSAILASVK	monophos-(27)NSSLSPGLNTSNGDGSETETTSAILASVK				335347													1	0	1	0	#DIV/0!	#DIV/0!	#DIV/0!	#DIV/0!
O35927	Ctnnd2	Catenin delta-2	261	GGSPLTTTQGGSPTK	diphos-(261)GGSPLTTTQGGSPTK	1.01898e+06	1.38087e+06	2.49527e+06	4.16225e+06	1.40384e+06	930565	2.88168e+06	1.96478e+06	1.38765e+06	1875609	2.34541e+06	1.31428e+06	694584	1.35932e+06	2.36477e+06	2.79091e+06	8	8	8	8	0.250112	0.577914	0.605208	0.675154
O35927	Ctnnd2	Catenin delta-2	261	GGSPLTTTQGGSPTK	monophos-(261)GGSPLTTTQGGSPTK		1.56133e+06							1.37045e+06					183878			1	2	2	1	#DIV/0!	#DIV/0!	#DIV/0!	#DIV/0!
O35927	Ctnnd2	Catenin delta-2	279	GGSAPEGAAYAAPR	monophos-(279)GGSAPEGAAYAAPR					168599												1	0	0	1	#DIV/0!	#DIV/0!	#DIV/0!	#DIV/0!
O35927	Ctnnd2	Catenin delta-2	293	GSSPKQSPSR	diphos-(293)GSSPKQSPSR				3142.29											1938.98		1	1	1	1	#DIV/0!	#DIV/0!	#DIV/0!	#DIV/0!
O35927	Ctnnd2	Catenin delta-2	306	SYSTSSPINIVVSSAGLSPIR	diphos-(306)SYSTSSPINIVVSSAGLSPIR											106158						0	1	1	0	#DIV/0!	#DIV/0!	#DIV/0!	#DIV/0!
O35927	Ctnnd2	Catenin delta-2	408	ALQSPEHHIDPIYEDR	monophos-(408)ALQSPEHHIDPIYEDR	3.59236e+06	4.59548e+06	3.75339e+06	3.50511e+06	1.56017e+06	1.3493e+06	3.1643e+06	4.28882e+06	5.26368e+06	3.16705e+06	6.12967e+06	3.9026e+06	2.88341e+06	862397	5.23238e+06	4.89966e+06	8	8	8	8	0.359171	0.283685	0.208991	0.102863
O35927	Ctnnd2	Catenin delta-2	432	SLSQSQGDPLPPAHTGTFR	monophos-(432)SLSQSQGDPLPPAHTGTFR	1.25836e+06	807786	1.02951e+06	424241	989543	695428					593862			375718	393026	460144	6	4	5	5	0.105968	0.0278878	0.646868	0.24034
O35927	Ctnnd2	Catenin delta-2	451	TSTAPSSPGVDSVPLQR	diphos-(451)TSTAPSSPGVDSVPLQR	318697		321041	510318	324252	263948	940945	357574	392477	992746	421631	363485		1.00483e+06	574885	597187	7	7	7	7	0.737877	0.195219	0.608617	0.473718
O35927	Ctnnd2	Catenin delta-2	451	TSTAPSSPGVDSVPLQR	monophos-(451)TSTAPSSPGVDSVPLQR	1.81294e+06	2.28349e+06	981942	1.05861e+06	1.11911e+06	948576	1.00685e+06	760400	1.14805e+06	2.47382e+06	2.02815e+06	852095	316368	439786	1.09193e+06	2.33914e+06	8	8	8	8	0.229613	0.801394	0.912918	0.0881712
O35927	Ctnnd2	Catenin delta-2	468	TGSQHGPQNAAAATFQR	monophos-(468)TGSQHGPQNAAAATFQR	2.35357e+06	1.77857e+06	3.45651e+06	735385	524199	385544	1.59212e+06	906725	3.86671e+06	1.26118e+06	2.80899e+06	783013	814981	1.96976e+06	1.11704e+06	1.31366e+06	8	8	8	8	0.933497	0.615097	0.0509496	0.0387411
O35927	Ctnnd2	Catenin delta-2	501	QLQYCASVDSPYSK	diphos-(501)QLQYCASVDSPYSK											241775						0	1	1	0	#DIV/0!	#DIV/0!	#DIV/0!	#DIV/0!
O35927	Ctnnd2	Catenin delta-2	501	QLQYCASVDSPYSK	monophos-(501)QLQYCASVDSPYSK	555357	275205			154738	314142			685738	879620	1.43673e+06			401999	331143		4	5	5	4	0.142028	0.118048	0.041231	0.0732438
O35927	Ctnnd2	Catenin delta-2	528	SPSIDSIQKDPR	diphos-(528)SPSIDSIQKDPR		4.89859e+06	4.75723e+06	1.31115e+07	4.03854e+06	3.42902e+06	4.01305e+06	5.3804e+06			5.76646e+06		2.53241e+06	5.46342e+06	8.5381e+06		7	4	4	7	0.65244	0.96541	0.127657	0.213055
O35927	Ctnnd2	Catenin delta-2	528	SPSIDSIQKDPR	monophos-(528)SPSIDSIQKDPR	825177	1.21556e+06	400554	1.21665e+06	566107	979851	705794	453898	1.01231e+06	1.81464e+06	940413	1.82794e+06	540047	147790	2.39088e+06	659510	8	8	8	8	0.035132	0.237191	0.384966	0.254859
O35927	Ctnnd2	Catenin delta-2	771	LAAETSQGQHMGTDELDGLLCGETNGK	monophos-(771)LAAETSQGQHMGTDELDGLLCGETNGK					62983.4							364261					1	1	1	1	#DIV/0!	#DIV/0!	#DIV/0!	#DIV/0!
O35927	Ctnnd2	Catenin delta-2	1050	DGWSQYHFVASSSTIER	monophos-(1050)DGWSQYHFVASSSTIER										349667	299722						0	2	2	0	#DIV/0!	#DIV/0!	#DIV/0!	#DIV/0!
O35927	Ctnnd2	Catenin delta-2	1077	TPSISPVRVSPNNR	diphos-(1077)TPSISPVRVSPNNR	243897	485279			3.35462e+06	325421			391261				584794	444642			4	3	3	4	0.00879107	0.46524	0.0138971	0.350503
O35927	Ctnnd2	Catenin delta-2	1077	TPSISPVR	monophos-(1077)TPSISPVR					104871	73765.6	364582		693208	705602				83061.4	264905		3	4	2	5	0.428216	0.257824	0.101033	0.00305286
P70698	Ctps1	CTP synthase 1	570	SGSSSPDSEITELKFPSISQD	diphos-(570)SGSSSPDSEITELKFPSISQD										56567.1	101285				230003		0	3	2	1	#DIV/0!	#DIV/0!	#DIV/0!	#DIV/0!
P70698	Ctps1	CTP synthase 1	570	SGSSSPDSEITELKFPSISQD	monophos-(570)SGSSSPDSEITELKFPSISQD	52810.4	153391							248231	170627					307537		2	3	4	1	0.81818	0.116066	#DIV/0!	#DIV/0!
Q60598	Cttn	Src substrate cortactin	3	ASAGHAVSITQDDGGADDWETDPDFVNDVSEK	monophos-(3)ASAGHAVSITQDDGGADDWETDPDFVNDVSEK	237514	303912	377062	160518		90723.6	469974		249444	217621	315805				325665	285740	6	5	7	4	0.0486361	0.929604	0.0997688	0.697726
Q60598	Cttn	Src substrate cortactin	398	KQTPPASPSPQPIEDRPPSSPIYEDAAPFK	diphos-(398)KQTPPASPSPQPIEDRPPSSPIYEDAAPFK	2.3164e+07	1.33403e+07	1.92257e+07	1.62518e+07	2.40694e+07	1.35815e+07	3.89349e+07	3.24669e+07	2.42105e+07	2.10949e+07	1.95496e+07	2.90871e+07	9.83761e+06	1.09415e+07	1.56028e+07	4.74142e+07	8	8	8	8	0.482202	0.939723	0.0118997	0.540119
Q60598	Cttn	Src substrate cortactin	398	KQTPPASPSPQPIEDRPPSSPIYEDAAPFK	monophos-(398)KQTPPASPSPQPIEDRPPSSPIYEDAAPFK	1.39813e+06	1.55358e+06	4.26461e+06	1.0442e+06	264289	1.07506e+06	6.22561e+06	854880	6.05603e+06	2.51805e+06	1.71956e+06	3.82175e+06	372030	996048	1.36124e+06	7.1308e+06	8	8	8	8	0.643284	0.435148	0.262366	0.663726
Q60598	Cttn	Src substrate cortactin	399	QTPPASPSPQPIEDRPPSSPIYEDAAPFK	monophos-(399)QTPPASPSPQPIEDRPPSSPIYEDAAPFK		537729							292475	396225				84898.8		449853	1	4	3	2	#DIV/0!	#DIV/0!	0.342042	0.452067
B9EJA2	Cttnbp2	Cortactin-binding protein 2	357	QSSHSDLGPSPPTALPSSANR	monophos-(357)QSSHSDLGPSPPTALPSSANR														624955			0	1	0	1	#DIV/0!	#DIV/0!	#DIV/0!	#DIV/0!
Q3U308	Ctu2	Cytoplasmic tRNA 2-thiolation protein 2	495	GSVSEEIQEYLITDEEEDS	monophos-(495)GSVSEEIQEYLITDEEEDS								76947.8									1	0	0	1	#DIV/0!	#DIV/0!	#DIV/0!	#DIV/0!
Q3TCH7	Cul4a	Cullin-4A	211	SLLRSLLSMLSDLQVYK	diphos-(211)SLLRSLLSMLSDLQVYK												3.69377e+06					0	1	1	0	#DIV/0!	#DIV/0!	#DIV/0!	#DIV/0!
Q3TKY6	Cwc27	Peptidyl-prolyl cis-trans isomerase CWC27 homolog	200	NFSLLSFGEEAEEEEEEVNR	monophos-(200)NFSLLSFGEEAEEEEEEVNR	64987.6	99669.3	287373		82690.1		391019	96150.6	143848	57625.9	157048			66921.4	265428	153922	6	6	6	6	0.223631	0.650763	0.388118	0.528062
O35188	Cx3cl1	Fractalkine	258	SLGSEEINPVHTDNFQER	monophos-(258)SLGSEEINPVHTDNFQER		436475			379820			667583	836531	985592	959846				627440	905134	3	5	4	4	0.8174	0.0137796	0.791729	0.374439
O35188	Cx3cl1	Fractalkine	276	GPGNTVHPSVAPISSEETPSPELVASGSQAPK	diphos-(276)GPGNTVHPSVAPISSEETPSPELVASGSQAPK		213597															1	0	1	0	#DIV/0!	#DIV/0!	#DIV/0!	#DIV/0!
P97792	Cxadr	Coxsackievirus and adenovirus receptor homolog	315	TQYNQVPSEDFERAPQSPTLAPAK	monophos-(315)TQYNQVPSEDFERAPQSPTLAPAK					486502												1	0	0	1	#DIV/0!	#DIV/0!	#DIV/0!	#DIV/0!
P97792	Cxadr	Coxsackievirus and adenovirus receptor homolog	328	APQSPTLAPAK	monophos-(328)APQSPTLAPAK	674552	529514				591238	1.27743e+06								880525		4	1	2	3	#DIV/0!	#DIV/0!	0.41198	0.316926
Q9CQX2	Cyb5b	Cytochrome b5 type B	50	FLSEHPGGEEVLLEQAGADATESFEDVGHSPDAR	monophos-(50)FLSEHPGGEEVLLEQAGADATESFEDVGHSPDAR								99664									1	0	0	1	#DIV/0!	#DIV/0!	#DIV/0!	#DIV/0!
Q8R4T1	Cys1	Cystin-1	89	LAPAVSPEKK	monophos-(89)LAPAVSPEKK		56771.8									56757.5						1	1	2	0	#DIV/0!	#DIV/0!	#DIV/0!	#DIV/0!
Q8R4T1	Cys1	Cystin-1	99	VKGNPEDSCASEAPGNSPK	monophos-(99)VKGNPEDSCASEAPGNSPK											158444						0	1	1	0	#DIV/0!	#DIV/0!	#DIV/0!	#DIV/0!
Q9QX11	Cyth1	Cytohesin-1	36	LKEEIAEVANEIESLGSTEER	monophos-(36)LKEEIAEVANEIESLGSTEER											111353						0	1	1	0	#DIV/0!	#DIV/0!	#DIV/0!	#DIV/0!
Q8VEB3	D1Ertd622e	UNC119-binding protein C5orf30 homolog	166	SLDYLNLDK	monophos-(166)SLDYLNLDK	29899.2	49181	46464.8	143829	59378.4	34091.7	205437	119801		38834.3	160559					185328	8	3	6	5	0.563988	0.376804	0.57826	0.314742
Q80U19	Daam2	Disheveled-associated activator of morphogenesis 2	700	ELGSTEDIYITSR	monophos-(700)ELGSTEDIYITSR	731145	378660	637149		672476		1.90079e+06	1.27956e+06	1.29195e+06	1.08451e+06	1.55725e+06		405415	577357			6	5	6	5	0.801364	0.878815	0.480831	0.950565
Q3UHC7	Dab2ip	Disabled homolog 2-interacting protein	699	LPSPTPENK	monophos-(699)LPSPTPENK	342721	437432				191639			617176	506172							3	2	4	1	0.817248	0.100458	#DIV/0!	#DIV/0!
Q3UHC7	Dab2ip	Disabled homolog 2-interacting protein	968	QQSSSSKGDSPELKPR	diphos-(968)QQSSSSKGDSPELKPR											501540						0	1	1	0	#DIV/0!	#DIV/0!	#DIV/0!	#DIV/0!
Q3UHC7	Dab2ip	Disabled homolog 2-interacting protein	968	QQSSSSKGDSPELKPR	monophos-(968)QQSSSSKGDSPELKPR											424080						0	1	1	0	#DIV/0!	#DIV/0!	#DIV/0!	#DIV/0!
Q8R4A3	Dact1	Dapper homolog 1	442	TSPGRGPVAPAESK	monophos-(442)TSPGRGPVAPAESK										7446.43							0	1	1	0	#DIV/0!	#DIV/0!	#DIV/0!	#DIV/0!
Q0PHV7	Dact3	Dapper homolog 3	3	AFSFPVSPER	diphos-(3)AFSFPVSPER	112257	125666	422721	544217	226898	104471	643730	304748	127211		293159			122217	456563	390864	8	5	6	7	0.567808	0.768001	0.916731	0.638495
Q0PHV7	Dact3	Dapper homolog 3	164	SLGDASPSAPESVGAR	monophos-(164)SLGDASPSAPESVGAR	450139	580753	695633	537186	196679	345449	1.12618e+06	567829	565843	619526	908638	426022	182260	301751	857407	828332	8	8	8	8	0.955604	0.864027	0.0422427	0.7353
Q0PHV7	Dact3	Dapper homolog 3	306	AWAAAWEAEVPPEPAPPAAASPPSSPAEGR	diphos-(306)AWAAAWEAEVPPEPAPPAAASPPSSPAEGR	75959.8	72514.8	367083			93748.5							140052	159191		246971	4	3	3	4	0.278827	0.752412	0.149749	0.900354
Q0PHV7	Dact3	Dapper homolog 3	406	SQSETSLLGR	monophos-(406)SQSETSLLGR	225931	272954	398231	387031	158669	108839	918101		253902	253486	407441			77617.8	351232	685624	7	6	7	6	0.545894	0.915967	0.00259377	0.650139
Q6WQJ1	Dagla	Sn1-specific diacylglycerol lipase alpha	817	DEGHLFYIDPAIPEENPSLSSR	monophos-(817)DEGHLFYIDPAIPEENPSLSSR		35454.9															1	0	1	0	#DIV/0!	#DIV/0!	#DIV/0!	#DIV/0!
Q6WQJ1	Dagla	Sn1-specific diacylglycerol lipase alpha	1022	TSTPTGHGASPTKQDDLVISAR	diphos-(1022)TSTPTGHGASPTKQDDLVISAR		370860								301229							1	1	2	0	#DIV/0!	#DIV/0!	#DIV/0!	#DIV/0!
Q6WQJ1	Dagla	Sn1-specific diacylglycerol lipase alpha	1022	TSTPTGHGASPTKQDDLVISAR	monophos-(1022)TSTPTGHGASPTKQDDLVISAR										532448							0	1	1	0	#DIV/0!	#DIV/0!	#DIV/0!	#DIV/0!
O54784	Dapk3	Death-associated protein kinase 3	310	NTSYASFER	monophos-(310)NTSYASFER			302679								267203						1	1	2	0	#DIV/0!	#DIV/0!	#DIV/0!	#DIV/0!
Q9QXS6	Dbn1	Drebrin	139	LSSPVLHR	monophos-(139)LSSPVLHR	2.05419e+06	3.66351e+06	3.40277e+06	2.78232e+06	1.25865e+06	1.05562e+06	3.20501e+06	3.00694e+06	2.66299e+06	3.58913e+06	3.71641e+06	3.00557e+06	1.04724e+06	836467	3.00126e+06	4.39578e+06	8	8	8	8	0.539036	0.692065	0.0458711	0.118934
Q9QXS6	Dbn1	Drebrin	329	ASDSGPSSSSSSSSSPPR	monophos-(329)ASDSGPSSSSSSSSSPPR	563329	308273	469620	441722	467746	72404.3	747069		1.0888e+06	537000	456342	346311	304567	51352.1	94978.5	895022	7	8	8	7	0.200138	0.835396	0.396058	0.338604
Q9QXS6	Dbn1	Drebrin	375	MAPTPIPTRSPSDSSTASTPIAEQIER	diphos-(375)MAPTPIPTRSPSDSSTASTPIAEQIER							1.00311e+06										1	0	0	1	#DIV/0!	#DIV/0!	#DIV/0!	#DIV/0!
Q9QXS6	Dbn1	Drebrin	384	SPSDSSTASTPIAEQIER	monophos-(384)SPSDSSTASTPIAEQIER	317444	435756	446784	535466		151116	418210			588658	368460			130871	503982		6	4	6	4	0.404518	0.897625	0.21311	0.141331
Q9QXS6	Dbn1	Drebrin	645	EGTQASEGYFSQSQEEEFAQSEEPCAK	monophos-(645)EGTQASEGYFSQSQEEEFAQSEEPCAK	1.78689e+06	1.30707e+06	3.37908e+06	1.40087e+06	1.86667e+06	2.18298e+06	1.79354e+06	918901	1.48552e+06	1.44169e+06	4.58603e+06	1.53814e+06	942850	1.2176e+06	1.07403e+06	3.41315e+06	8	8	8	8	0.152278	0.806498	0.371398	0.412605
Q9CRD4	Dbndd2	Dysbindin domain-containing protein 2	114	TSSLSSDSSNLR	monophos-(114)TSSLSSDSSNLR			191859								277934					747427	1	2	2	1	#DIV/0!	#DIV/0!	#DIV/0!	#DIV/0!
Q9CRD4	Dbndd2	Dysbindin domain-containing protein 2	126	SPNPSDGGGDTPLAQSDEEDGDDGGAEPGPCS	diphos-(126)SPNPSDGGGDTPLAQSDEEDGDDGGAEPGPCS											153965						0	1	1	0	#DIV/0!	#DIV/0!	#DIV/0!	#DIV/0!
Q9CRD4	Dbndd2	Dysbindin domain-containing protein 2	126	SPNPSDGGGDTPLAQSDEEDGDDGGAEPGPCS	monophos-(126)SPNPSDGGGDTPLAQSDEEDGDDGGAEPGPCS			350033								940861					266866	1	2	2	1	#DIV/0!	#DIV/0!	#DIV/0!	#DIV/0!
Q62418	Dbnl	Drebrin-like protein	18	VVTEKSPTDWALFTYEGNSNDIR	monophos-(18)VVTEKSPTDWALFTYEGNSNDIR			317542		405716	110074					186042		101563				3	2	2	3	0.536213	0.336738	0.709818	0.760923
Q62418	Dbnl	Drebrin-like protein	272	ERAMSTTSVTSSQPGK	monophos-(272)ERAMSTTSVTSSQPGK	1.35009e+06	3.23324e+06	1.40104e+06	395081	833868	657610	856968	233572	993611	1.86044e+06	1.64979e+06	308997	1.341e+06	685729	803160	774726	8	8	8	8	0.141457	0.861468	0.00876397	0.104773
Q62418	Dbnl	Drebrin-like protein	296	QLTQPETSYGR	monophos-(296)QLTQPETSYGR	941123	1.13387e+06	1.30698e+06	540065	540213	419462	1.8726e+06	1.22105e+06	1.07641e+06	638963	1.97399e+06	438110	193454	433794	953458	1.49349e+06	8	8	8	8	0.602771	0.729962	0.645052	0.680547
Q9DC22	Dcaf6	DDB1- and CUL4-associated factor 6	331	DGEQSPNVSLMQR	monophos-(331)DGEQSPNVSLMQR														76668.4			0	1	0	1	#DIV/0!	#DIV/0!	#DIV/0!	#DIV/0!
Q9DC22	Dcaf6	DDB1- and CUL4-associated factor 6	663	DSALQDTDDSDDDPVLIPGAR	diphos-(663)DSALQDTDDSDDDPVLIPGAR				340764			987856	548836			353984	410013		365145	583441	287412	3	5	3	5	0.0689397	0.19378	0.0360517	0.201897
Q8N7N5	Dcaf8	DDB1- and CUL4-associated factor 8	95	GHGHSDEEDEEQPR	monophos-(95)GHGHSDEEDEEQPR																18055.2	0	1	0	1	#DIV/0!	#DIV/0!	#DIV/0!	#DIV/0!
Q8N7N5	Dcaf8	DDB1- and CUL4-associated factor 8	119	DQDSSDDERALEDWVSSETTALPRPR	diphos-(119)DQDSSDDERALEDWVSSETTALPRPR								606669								422682	1	1	0	2	#DIV/0!	#DIV/0!	#DIV/0!	#DIV/0!
Q9JLM8	Dclk1	Serine/threonine-protein kinase DCLK1	233	LYTLDGKQVMCLQDFFGDDDIFIACGPEK	diphos-(233)LYTLDGKQVMCLQDFFGDDDIFIACGPEK															466141		0	1	0	1	#DIV/0!	#DIV/0!	#DIV/0!	#DIV/0!
Q9JLM8	Dclk1	Serine/threonine-protein kinase DCLK1	304	SKSPASTSSVNGTPGSQLSTPR	diphos-(304)SKSPASTSSVNGTPGSQLSTPR						247395											1	0	0	1	#DIV/0!	#DIV/0!	#DIV/0!	#DIV/0!
Q9JLM8	Dclk1	Serine/threonine-protein kinase DCLK1	304	SKSPASTSSVNGTPGSQLSTPR	monophos-(304)SKSPASTSSVNGTPGSQLSTPR															2.51243e+06		0	1	0	1	#DIV/0!	#DIV/0!	#DIV/0!	#DIV/0!
Q9JLM8	Dclk1	Serine/threonine-protein kinase DCLK1	326	SGKSPSPSPTSPGSLR	diphos-(326)SGKSPSPSPTSPGSLR		257155	566018	1.07078e+06	465038	1.68144e+06		947962			623104			3.33175e+06	1.79815e+06		6	3	4	5	0.0720536	0.112475	0.0820571	0.118949
Q9JLM8	Dclk1	Serine/threonine-protein kinase DCLK1	329	SPSPSPTSPGSLRK	monophos-(329)SPSPSPTSPGSLRK	3.88996e+06	7.01058e+06	7.2994e+06	4.29518e+06	2.43107e+06	3.76168e+06	5.61083e+06	8.50806e+06	6.18736e+06	7.25653e+06	1.01144e+07	2.94229e+06	1.9365e+06	1.21542e+06	7.73429e+06	5.1969e+06	8	8	8	8	0.325975	0.983493	0.714577	0.230113
Q9JLM8	Dclk1	Serine/threonine-protein kinase DCLK1	345	ISQHGGSSTSLSSTK	diphos-(345)ISQHGGSSTSLSSTK	839132	2.94742e+06	3.4265e+06	2.04748e+06	2.2854e+06	1.25255e+06	1.47131e+06	4.03661e+06	1.03376e+06	1.39231e+06	4.76884e+06	1.22683e+06	847276	1.48385e+06	2.18401e+06	1.79126e+06	8	8	8	8	0.759847	0.463523	0.374694	0.635084
Q9JLM8	Dclk1	Serine/threonine-protein kinase DCLK1	345	ISQHGGSSTSLSSTK	monophos-(345)ISQHGGSSTSLSSTK	2.17176e+06	3.13998e+06	6.10499e+06	1.84413e+06	1.36624e+06	1.37745e+06	1.59521e+06	2.14321e+06	3.99769e+06	5.35842e+06	3.27865e+06	1.85968e+06	1.36799e+06	2.8859e+06	305054	3.1886e+06	8	8	8	8	0.994328	0.698499	0.176758	0.021489
Q9JLM8	Dclk1	Serine/threonine-protein kinase DCLK1	360	VCSSMDENDGPGEGDELGRR	monophos-(360)VCSSMDENDGPGEGDELGRR	1.00049e+06	1.45199e+06	3.21749e+06	232909	788100	457261	294255	231077	1.43768e+06	598228	2.22126e+06		84677	490105	587448	291572	8	7	7	8	0.487671	0.762854	0.000817429	0.0333889
Q9JLM8	Dclk1	Serine/threonine-protein kinase DCLK1	388	REESEEGFQIPATITER	monophos-(388)REESEEGFQIPATITER	1.16698e+06	2.15596e+06	3.04902e+06	3.30926e+06	848684	1.09327e+06	2.88148e+06	2.14143e+06	1.69621e+06	1.81656e+06	2.51937e+06	2.96724e+06	593066	1.02737e+06	3.68458e+06	2.84148e+06	8	8	8	8	0.82537	0.902565	0.282337	0.375141
Q9JLM8	Dclk1	Serine/threonine-protein kinase DCLK1	683	HFNTGPKPSSTAAGVSVIATTALDKER	diphos-(683)HFNTGPKPSSTAAGVSVIATTALDKER															1.18269e+06		0	1	0	1	#DIV/0!	#DIV/0!	#DIV/0!	#DIV/0!
Q9JLM8	Dclk1	Serine/threonine-protein kinase DCLK1	726	AQPAPPELNSESEDYSPSSSETVR	diphos-(726)AQPAPPELNSESEDYSPSSSETVR	1.66803e+06	1.9954e+06	1.10185e+07	2.53949e+06	1.89788e+06	870602	1.44268e+06	928233	4.7357e+06	4.68083e+06	4.9613e+06	2.2923e+06	928499	2.10841e+06	1.09242e+06	2.22168e+06	8	8	8	8	0.0827433	0.951337	0.000231063	0.036033
Q9JLM8	Dclk1	Serine/threonine-protein kinase DCLK1	726	AQPAPPELNSESEDYSPSSSETVR	monophos-(726)AQPAPPELNSESEDYSPSSSETVR	1.19305e+06	747828	2.82356e+06	910739	1.82757e+06	404948	1.41534e+06	598338	1.88594e+06	2.01731e+06	1.66311e+06	870330	407118	570114		822236	8	7	8	7	0.686127	0.869357	0.533493	0.0733086
Q6PGN3	Dclk2	Serine/threonine-protein kinase DCLK2	5	SIELEHFEER	monophos-(5)SIELEHFEER						79723.2		358008									2	0	0	2	#DIV/0!	#DIV/0!	#DIV/0!	#DIV/0!
O08788	Dctn1	Dynactin subunit 1	90	QSQIQVFEDGADTTSPETPDSSASK	diphos-(90)QSQIQVFEDGADTTSPETPDSSASK					830323									630135			1	1	0	2	#DIV/0!	#DIV/0!	#DIV/0!	#DIV/0!
O08788	Dctn1	Dynactin subunit 1	90	QSQIQVFEDGADTTSPETPDSSASK	monophos-(90)QSQIQVFEDGADTTSPETPDSSASK					209871									498729			1	1	0	2	#DIV/0!	#DIV/0!	#DIV/0!	#DIV/0!
Q99KJ8	Dctn2	Dynactin subunit 2	78	TGYESGDYEMLGEGLGVK	monophos-(78)TGYESGDYEMLGEGLGVK		78232.2	158474					280680	121554	83743	187631			75479.9		197289	3	5	5	3	0.295637	0.499906	0.174808	0.301836
O88809	Dcx	Neuronal migration protein doublecortin	303	SKSPADSGNDQDANGTSSSQLSTPK	monophos-(303)SKSPADSGNDQDANGTSSSQLSTPK			143153														1	0	1	0	#DIV/0!	#DIV/0!	#DIV/0!	#DIV/0!
O88809	Dcx	Neuronal migration protein doublecortin	328	SKQSPISTPTSPGSLR	diphos-(328)SKQSPISTPTSPGSLR			259511					811355									2	0	1	1	#DIV/0!	#DIV/0!	#DIV/0!	#DIV/0!
Q9CWS0	Ddah1	N(G),N(G)-dimethylarginine dimethylaminohydrolase 1	32	SQGEEVDFAR	monophos-(32)SQGEEVDFAR	139644																1	0	1	0	#DIV/0!	#DIV/0!	#DIV/0!	#DIV/0!
Q80YA3	Ddhd1	Phospholipase DDHD1	354	EPTSVSDSENIAAIPSPVTSPVLSR	diphos-(354)EPTSVSDSENIAAIPSPVTSPVLSR	266061	285651	611473	1.14872e+06	511860		903239	710321	310755		517942		412808	463481			7	4	6	5	0.058379	0.245048	0.350547	0.666663
Q80YA3	Ddhd1	Phospholipase DDHD1	354	EPTSVSDSENIAAIPSPVTSPVLSR	monophos-(354)EPTSVSDSENIAAIPSPVTSPVLSR	77236.8																1	0	1	0	#DIV/0!	#DIV/0!	#DIV/0!	#DIV/0!
A2ADY9	Ddi2	Protein DDI1 homolog 2	114	TQAQHSSPGEMASSPQGLDNPALLR	diphos-(114)TQAQHSSPGEMASSPQGLDNPALLR		201424	1.06634e+06		344535					239763			185714	352773			3	3	3	3	0.0654105	0.364743	0.0716038	0.508863
A2ADY9	Ddi2	Protein DDI1 homolog 2	114	TQAQHSSPGEMASSPQGLDNPALLR	monophos-(114)TQAQHSSPGEMASSPQGLDNPALLR			367686														1	0	1	0	#DIV/0!	#DIV/0!	#DIV/0!	#DIV/0!
Q810A7	Ddx42	ATP-dependent RNA helicase DDX42	99	QQFHSKPADSDSDDDPLEAFMAEVEDQAAR	diphos-(99)QQFHSKPADSDSDDDPLEAFMAEVEDQAAR			3.53e+06					348142			423935	717375	126689			1.0143e+06	2	4	3	3	0.0194875	0.546743	0.135338	0.359355
Q810A7	Ddx42	ATP-dependent RNA helicase DDX42	162	YMAENPTAGVVQEEEEDNLEYDSDGNPIAPSKK	monophos-(162)YMAENPTAGVVQEEEEDNLEYDSDGNPIAPSKK	850335	464987	1.54961e+06	407679			301690	842393	798413	887293	954427					557111	6	4	7	3	0.139939	0.802482	0.759345	0.286849
Q810A7	Ddx42	ATP-dependent RNA helicase DDX42	906	TDKTPDGFAVPEPPK	diphos-(906)TDKTPDGFAVPEPPK									3143.79								0	1	1	0	#DIV/0!	#DIV/0!	#DIV/0!	#DIV/0!
Q569Z5	Ddx46	Probable ATP-dependent RNA helicase DDX46	796	AALGLQDSDDEDAAVDIDEQIESMFNSK	monophos-(796)AALGLQDSDDEDAAVDIDEQIESMFNSK			859946							99681.4			166132	64574.4			1	3	2	2	#DIV/0!	#DIV/0!	0.169082	0.442247
Q99J78	Def8	Differentially expressed in FDCP 8	434	KQSLFQEPGLDMDA	monophos-(434)KQSLFQEPGLDMDA			255614														1	0	1	0	#DIV/0!	#DIV/0!	#DIV/0!	#DIV/0!
Q7TNV0	Dek	Protein DEK	30	EESEEEEEDDEDDDEEDEEEEKEK	monophos-(30)EESEEEEEDDEDDDEEDEEEEKEK								64538.1			283260						1	1	1	1	#DIV/0!	#DIV/0!	#DIV/0!	#DIV/0!
Q8K382	Dennd1a	DENN domain-containing protein 1A	591	SLEDLRAPK	monophos-(591)SLEDLRAPK													203847				0	1	0	1	#DIV/0!	#DIV/0!	#DIV/0!	#DIV/0!
Q9CQJ6	Denr	Density-regulated protein	67	LTVENSPKQETGITEGQGPVGEEEEK	monophos-(67)LTVENSPKQETGITEGQGPVGEEEEK	1.49635e+06	2.46629e+06	1.03381e+06	642077	344947		498377	600714	507173	1.03717e+06	747338	571361	529658	260359	461124	688736	7	8	8	7	0.00644002	0.205122	0.00184256	0.0413415
O54786	Dffa	DNA fragmentation factor subunit alpha	93	WIYNDSDGGTAWVSQESFEADEPDSR	diphos-(93)WIYNDSDGGTAWVSQESFEADEPDSR											177994						0	1	1	0	#DIV/0!	#DIV/0!	#DIV/0!	#DIV/0!
O54786	Dffa	DNA fragmentation factor subunit alpha	93	WIYNDSDGGTAWVSQESFEADEPDSR	monophos-(93)WIYNDSDGGTAWVSQESFEADEPDSR			257308								146255						1	1	2	0	#DIV/0!	#DIV/0!	#DIV/0!	#DIV/0!
Q6NS52	Dgkb	Diacylglycerol kinase beta	633	LHESVEIECDGVQIDLINISLEGIAILNIPSMHGGSNLWGESK	diphos-(633)LHESVEIECDGVQIDLINISLEGIAILNIPSMHGGSNLWGESK														173951			0	1	0	1	#DIV/0!	#DIV/0!	#DIV/0!	#DIV/0!
Q99PU8	Dhx30	Putative ATP-dependent RNA helicase DHX30	246	GGSFEMTDDDSAIR	monophos-(246)GGSFEMTDDDSAIR		201655	366058	272534	154843				289215	336046				139118	198821	305221	4	5	5	4	0.800255	0.934803	0.728418	0.0808505
Q8BTT6	Diexf	Digestive organ expansion factor homolog	40	EAKPQICQLPESSDSSHSESESESEQEHVSGYHR	diphos-(40)EAKPQICQLPESSDSSHSESESESEQEHVSGYHR				949441	1.29233e+07			2.53096e+06				6.4323e+06					3	1	2	2	#DIV/0!	#DIV/0!	0.618125	0.563035
Q5PR73	Diras2	GTP-binding protein Di-Ras2	29	GTFRESYIPTVEDTYR	monophos-(29)GTFRESYIPTVEDTYR	314658	1.34986e+06	304268		391338	333856	1.73422e+06		874148	90919.8	342745	1.53082e+06	90332.7	52015.2	1.52907e+06	505904	6	8	7	7	0.91859	0.748453	0.667844	0.9434
Q5PR73	Diras2	GTP-binding protein Di-Ras2	33	ESYIPTVEDTYR	monophos-(33)ESYIPTVEDTYR							405659										1	0	0	1	#DIV/0!	#DIV/0!	#DIV/0!	#DIV/0!
Q5PR73	Diras2	GTP-binding protein Di-Ras2	122	CDESPNREVQSSEAEALAR	monophos-(122)CDESPNREVQSSEAEALAR		181731	527701		149241					301789	417059		223206	117469		388426	3	5	4	4	0.330023	0.977559	0.741014	0.201753
Q5PR73	Diras2	GTP-binding protein Di-Ras2	172	TVSLQIDGKK	monophos-(172)TVSLQIDGKK		42834.3	108878		36510.1		362555				195980	98460.9					4	2	4	2	0.63276	0.939987	0.0714363	0.470621
Q8CI75	Dis3l2	DIS3-like exonuclease 2	856	RPGLEKASDEEPED	monophos-(856)RPGLEKASDEEPED		661096	395429		355961					852829			397340				3	2	3	2	0.383613	0.515889	0.179421	0.22787
Q811D0	Dlg1	Disks large homolog 1	561	EQMMNSSVSSGSGSLR	monophos-(561)EQMMNSSVSSGSGSLR	600406	1.14207e+06	542051		106936	348985			736708	500016	813567			313292	278545	220314	5	6	6	5	0.373251	0.719782	0.0995589	0.00258617
Q91XM9	Dlg2	Disks large homolog 2	362	HYSPVECDK	monophos-(362)HYSPVECDK											225204						0	1	1	0	#DIV/0!	#DIV/0!	#DIV/0!	#DIV/0!
Q91XM9	Dlg2	Disks large homolog 2	411	AISLEGEPR	monophos-(411)AISLEGEPR	1.31199e+06		1.65684e+06	2.16227e+06	1.0337e+06		2.6471e+06	764514	1.61634e+06	947492	1.82421e+06	1.75557e+06	251757	650183	2.09378e+06	2.34427e+06	6	8	7	7	0.967632	0.689137	0.0478833	0.596335
Q62108	Dlg4	Disks large homolog 4	408	EQLMNSSLGSGTASLR	diphos-(408)EQLMNSSLGSGTASLR	564398		1.35007e+06			219135					568056			201367			3	2	3	2	0.603214	0.523243	0.0392542	0.141831
Q62108	Dlg4	Disks large homolog 4	408	EQLMNSSLGSGTASLR	monophos-(408)EQLMNSSLGSGTASLR	391206	548587				177821			409257					109183			3	2	3	2	0.74466	0.569967	0.740334	0.0213618
Q9D415	Dlgap1	Disks large-associated protein 1	355	AMGDEDSGDSDTSPKPSPK	diphos-(355)AMGDEDSGDSDTSPKPSPK							207532										1	0	0	1	#DIV/0!	#DIV/0!	#DIV/0!	#DIV/0!
Q9D415	Dlgap1	Disks large-associated protein 1	415	AVSEVSINR	monophos-(415)AVSEVSINR						204210											1	0	0	1	#DIV/0!	#DIV/0!	#DIV/0!	#DIV/0!
Q9D415	Dlgap1	Disks large-associated protein 1	424	SLDSLDPAGLLTSPK	diphos-(424)SLDSLDPAGLLTSPK				206399		98253.2		243275							166161		3	1	1	3	#DIV/0!	#DIV/0!	#DIV/0!	#DIV/0!
Q9D415	Dlgap1	Disks large-associated protein 1	424	SLDSLDPAGLLTSPK	monophos-(424)SLDSLDPAGLLTSPK	158232	206554	493002	751092		328931	994252	696760	196978	207680	186671	392527		204184	566043	794611	7	7	8	6	0.529866	0.315741	0.394977	0.0640799
Q9D415	Dlgap1	Disks large-associated protein 1	506	GCSQDDECVSLR	monophos-(506)GCSQDDECVSLR	348462	502150	446734			257396					392637						4	1	4	1	#DIV/0!	#DIV/0!	#DIV/0!	#DIV/0!
Q9D415	Dlgap1	Disks large-associated protein 1	970	QNSATESAESIEIYIPEAQTR	monophos-(970)QNSATESAESIEIYIPEAQTR	276571	172852	240990	615802	315482	270761	577887	516725	142886	177780	266516			248505	245943	761554	8	6	7	7	0.465358	0.543577	0.593736	0.151821
Q8BJ42	Dlgap2	Disks large-associated protein 2	87	NQPQLCAGHTCGLSPPDDCEHPHDHMHHGSDVR	monophos-(87)NQPQLCAGHTCGLSPPDDCEHPHDHMHHGSDVR		39309.8															1	0	1	0	#DIV/0!	#DIV/0!	#DIV/0!	#DIV/0!
Q8BJ42	Dlgap2	Disks large-associated protein 2	623	TTSKPLISVTAQSSTESTQDAYQDSR	diphos-(623)TTSKPLISVTAQSSTESTQDAYQDSR		285698	449084	217081							379170	223639		129514			3	3	5	1	0.943805	0.505529	#DIV/0!	#DIV/0!
Q8BJ42	Dlgap2	Disks large-associated protein 2	661	GGLYNSMDSLDSNK	diphos-(661)GGLYNSMDSLDSNK											200169			126407			0	2	1	1	#DIV/0!	#DIV/0!	#DIV/0!	#DIV/0!
Q8BJ42	Dlgap2	Disks large-associated protein 2	661	GGLYNSMDSLDSNK	monophos-(661)GGLYNSMDSLDSNK	164766	162063	294260			151262					345062			544829		225766	4	3	4	3	0.191352	0.0966504	0.216662	0.591881
Q8BJ42	Dlgap2	Disks large-associated protein 2	699	SIDKAVLASK	monophos-(699)SIDKAVLASK	91140.8	146091															2	0	2	0	#DIV/0!	#DIV/0!	#DIV/0!	#DIV/0!
Q8BJ42	Dlgap2	Disks large-associated protein 2	717	CSSIGVQDSEFPDHQPYPR	monophos-(717)CSSIGVQDSEFPDHQPYPR	311272	177012				158867											3	0	2	1	#DIV/0!	#DIV/0!	#DIV/0!	#DIV/0!
Q8BJ42	Dlgap2	Disks large-associated protein 2	736	SDVETATDSDTESR	monophos-(736)SDVETATDSDTESR	172650	85021		680828			2.12245e+06		102399	388501	84913.4	692106		130333	85304.3	884192	4	7	7	4	0.0308153	0.438011	0.0120658	0.382089
Q8BJ42	Dlgap2	Disks large-associated protein 2	773	SNSVTAAVQADLELEGFPGHVSMEDK	monophos-(773)SNSVTAAVQADLELEGFPGHVSMEDK				21064.2			107314	119989				66164.3					3	1	2	2	#DIV/0!	#DIV/0!	0.348838	0.0960147
Q8BJ42	Dlgap2	Disks large-associated protein 2	1009	EKSLDLPDR	monophos-(1009)EKSLDLPDR	2.47257e+06	3.20853e+06	2.05068e+06	2.57107e+06	1.03432e+06	1.79329e+06	4.3554e+06	3.27286e+06	2.76303e+06	3.64698e+06	3.12586e+07	2.61193e+06		643113	4.21014e+06	3.81777e+06	8	7	8	7	2.81808e-06	0.322345	0.000217277	0.351948
Q8BJ42	Dlgap2	Disks large-associated protein 2	1032	AASFRQNSATER	diphos-(1032)AASFRQNSATER		134451	106927								98561.5						2	1	3	0	#DIV/0!	#DIV/0!	#DIV/0!	#DIV/0!
Q8BJ42	Dlgap2	Disks large-associated protein 2	1037	QNSATERADSIEIYIPEAQTR	diphos-(1037)QNSATERADSIEIYIPEAQTR	826364	559847	1.49476e+06	559901	1.80339e+06	1.14561e+06	862671	1.16926e+06	421069	354686	969790		379904	849152	545424	1.73397e+06	8	7	7	8	0.756851	0.232405	0.550692	0.203934
Q8BJ42	Dlgap2	Disks large-associated protein 2	1044	ADSIEIYIPEAQTR	monophos-(1044)ADSIEIYIPEAQTR	511499	531347	779891	719107	228640	422445	1.40811e+06	737154	648515	540696	937375	516662			982324	1.39497e+06	8	6	8	6	0.96152	0.381624	0.00840757	0.344325
Q6PFD5	Dlgap3	Disks large-associated protein 3	551	ISITAQSSTDSAHESFTAAEGPAR	diphos-(551)ISITAQSSTDSAHESFTAAEGPAR	108777		744532		472182						158555						3	1	3	1	#DIV/0!	#DIV/0!	#DIV/0!	#DIV/0!
Q6PFD5	Dlgap3	Disks large-associated protein 3	671	SNSVTAGVQADLELEGLAGLATVATEDK	monophos-(671)SNSVTAGVQADLELEGLAGLATVATEDK											601715						0	1	1	0	#DIV/0!	#DIV/0!	#DIV/0!	#DIV/0!
Q6PFD5	Dlgap3	Disks large-associated protein 3	955	HSSATESADSIEIYIPEAQTR	diphos-(955)HSSATESADSIEIYIPEAQTR	555348		1.40371e+06	707176	1.75242e+06	804154	1.59141e+06				631204			1.14534e+06	243577		6	3	4	5	0.995617	0.226168	0.490778	0.450229
Q6PFD5	Dlgap3	Disks large-associated protein 3	955	HSSATESADSIEIYIPEAQTR	monophos-(955)HSSATESADSIEIYIPEAQTR	628431		257825			233177					689636						3	1	3	1	#DIV/0!	#DIV/0!	#DIV/0!	#DIV/0!
B1AZP2	Dlgap4	Disks large-associated protein 4	132	GESPGRIR	monophos-(132)GESPGRIR									128633								0	1	1	0	#DIV/0!	#DIV/0!	#DIV/0!	#DIV/0!
B1AZP2	Dlgap4	Disks large-associated protein 4	198	SNISGWWSSDDNLDGEGGAFR	monophos-(198)SNISGWWSSDDNLDGEGGAFR	145431	243258				44666.2		394995			422435				198963		4	2	3	3	0.734665	0.473788	0.7806	0.68073
B1AZP2	Dlgap4	Disks large-associated protein 4	400	ATQQSLGEQSNPR	monophos-(400)ATQQSLGEQSNPR	407152	552342	362883	390404	112514	273305	367554	215972	395534	471709	558170	167054	111110	211275	573835	440660	8	8	8	8	0.45092	0.702189	0.494172	0.10599
B1AZP2	Dlgap4	Disks large-associated protein 4	414	SLDRLDSVDMLLPSK	diphos-(414)SLDRLDSVDMLLPSK	431306	534744	2.0311e+06	2.45665e+06	866447	1.08445e+06	2.95035e+06	2.25195e+06	271491	367324	1.28172e+06	1.3677e+06	460996	974552	1.98369e+06	1.67822e+06	8	8	8	8	0.300905	0.216653	0.988423	0.308819
B1AZP2	Dlgap4	Disks large-associated protein 4	414	SLDRLDSVDMLLPSK	monophos-(414)SLDRLDSVDMLLPSK		149460		217586			980754	314857	98593.3	95886.9	236845	199389			339772		4	5	6	3	0.0274927	0.334448	0.00184161	0.223099
B1AZP2	Dlgap4	Disks large-associated protein 4	596	SEVTSQSGLSNSSDSLDSSTRPPSVTR	diphos-(596)SEVTSQSGLSNSSDSLDSSTRPPSVTR					103556						306733						1	1	1	1	#DIV/0!	#DIV/0!	#DIV/0!	#DIV/0!
B1AZP2	Dlgap4	Disks large-associated protein 4	760	NLSYGDNSDPALEASSLPPPDPWLETSSSSPAEPAQPGACR	monophos-(760)NLSYGDNSDPALEASSLPPPDPWLETSSSSPAEPAQPGACR	149107																1	0	1	0	#DIV/0!	#DIV/0!	#DIV/0!	#DIV/0!
B1AZP2	Dlgap4	Disks large-associated protein 4	970	QNSATESADSIEIYVPEAQTR	monophos-(970)QNSATESADSIEIYVPEAQTR	192340	406763	1.85354e+06	199656	147294	95446.4	347087	1.05093e+06	288331	264136	1.54973e+06			561098	337543	149942	8	6	7	7	0.741071	0.971111	0.0917085	0.3384
P11531	Dmd	Dystrophin	3613	SDSSQPMLLR	monophos-(3613)SDSSQPMLLR					207736										216571		1	1	0	2	#DIV/0!	#DIV/0!	#DIV/0!	#DIV/0!
Q9WV69	Dmtn	Dematin	6	QPLTSPGSVSSSR	monophos-(6)QPLTSPGSVSSSR	193898	183124			197280				160448	295485							3	2	4	1	0.0118816	0.684215	#DIV/0!	#DIV/0!
Q9WV69	Dmtn	Dematin	19	DSSVPGSPSSIVAK	monophos-(19)DSSVPGSPSSIVAK	1.32158e+06	1.61582e+06	1.68125e+06	788913	951071	397689	3.92415e+06	3.22631e+06	1.99942e+06	1.14354e+06	5.59127e+06	1.76964e+06	415091	485632	3.63947e+06	1.71296e+06	8	8	8	8	0.37489	0.643077	0.974902	0.851018
Q9WV69	Dmtn	Dematin	89	STSPPPSPEVWAESR	diphos-(89)STSPPPSPEVWAESR	9.17759e+06	7.07603e+06	1.32997e+07	1.01888e+07	1.0607e+07	8.86451e+06	3.70635e+07	1.30307e+07	7.33092e+06	8.34256e+06	2.06301e+07	2.03708e+07	5.00433e+06	8.67599e+06	1.63783e+07	1.28826e+07	8	8	8	8	0.241408	0.768682	0.151241	0.624389
Q9WV69	Dmtn	Dematin	89	STSPPPSPEVWAESR	monophos-(89)STSPPPSPEVWAESR	1.1885e+07	1.2224e+07	2.76968e+07	2.43358e+07	2.28643e+07	1.16392e+07	3.26083e+07	2.25277e+07	2.42308e+07	1.11634e+07	1.52094e+07	3.85807e+07	1.39354e+07	7.93925e+06	3.73048e+07	4.25218e+07	8	8	8	8	0.169655	0.586327	0.515539	0.572664
Q9WV69	Dmtn	Dematin	212	KGAEEEEEEEDDDSEEEIK	monophos-(212)KGAEEEEEEEDDDSEEEIK	60206.3	535129	2.62912e+06	811781	217064	513264	370152	2.74569e+06		178463	5.64314e+06	1.92127e+06	302533	370574	502145	1.71354e+06	8	7	7	8	0.143881	0.515559	0.0588029	0.299158
Q9WV69	Dmtn	Dematin	266	TRSLPDR	monophos-(266)TRSLPDR					1.4068e+06							3.50339e+06	1.34787e+06				1	2	1	2	#DIV/0!	#DIV/0!	#DIV/0!	#DIV/0!
Q9WV69	Dmtn	Dematin	286	SSSLPSYGR	monophos-(286)SSSLPSYGR	1.59924e+06	1.95178e+06	4.44337e+06	1.45914e+06	1.65456e+06	655649	2.168e+06	2.15899e+06	2.54849e+06	1.54999e+06	6.05705e+06	2.26683e+06	760550	915164	1.81555e+06	8.54069e+06	8	8	8	8	0.025851	0.346119	0.263187	0.716995
Q9WV69	Dmtn	Dematin	300	LQSTEFSPSGSEAGSPGLQNGEGQR	monophos-(300)LQSTEFSPSGSEAGSPGLQNGEGQR	1.09586e+06		229954		203294	62494.1					300560			83192.7			4	2	3	3	0.468706	0.597281	0.0487748	0.263282
Q9WV69	Dmtn	Dematin	327	MDRGNSLPCVLEQK	monophos-(327)MDRGNSLPCVLEQK	2.25432e+06	2.46704e+06	5.38232e+06	2.0097e+06	3.96461e+06	1.26259e+06	4.01677e+06	3.43269e+06	3.39125e+06	1.55713e+06	6.17086e+06	3.13255e+06	1.8102e+06	1.30552e+06	3.45894e+06	4.8328e+06	8	8	8	8	0.563887	0.888461	0.625935	0.71224
Q9WV69	Dmtn	Dematin	369	HLSAEDFSR	monophos-(369)HLSAEDFSR	957963	1.29178e+06	2.14275e+06	1.04281e+06	1.06467e+06	745428	2.74856e+06	2.19669e+06	1.28543e+06	370632	3.14071e+06	1.47401e+06	638811	454438	1.81792e+06	2.69676e+06	8	8	8	8	0.393108	0.93157	0.783622	0.856366
Q6PNC0	Dmxl1	DmX-like protein 1	54	HGNIQVGCVDCSMQQGKIAASYGNVISVFEPVSLPK	monophos-(54)HGNIQVGCVDCSMQQGKIAASYGNVISVFEPVSLPK														446917			0	1	0	1	#DIV/0!	#DIV/0!	#DIV/0!	#DIV/0!
Q8BPN8	Dmxl2	DmX-like protein 2	323	RSSVLVTHAELMPDK	monophos-(323)RSSVLVTHAELMPDK			803133						266749				309678				1	2	2	1	#DIV/0!	#DIV/0!	#DIV/0!	#DIV/0!
Q8BPN8	Dmxl2	DmX-like protein 2	417	QLDHESDDADREDEER	monophos-(417)QLDHESDDADREDEER			256816										96648				1	1	1	1	#DIV/0!	#DIV/0!	#DIV/0!	#DIV/0!
Q8BPN8	Dmxl2	DmX-like protein 2	454	ESEAGTGSSEHEDGEREGSPR	monophos-(454)ESEAGTGSSEHEDGEREGSPR	6393.61									28047.7			11378.2				1	2	2	1	#DIV/0!	#DIV/0!	#DIV/0!	#DIV/0!
Q8BPN8	Dmxl2	DmX-like protein 2	1131	VGSVLDSRVSVDSNLFVYSK	diphos-(1131)VGSVLDSRVSVDSNLFVYSK			620294		1.2454e+06	96341.2					268731	397210	2.2265e+06				3	3	3	3	0.432534	0.686506	0.0541686	0.289854
Q8BPN8	Dmxl2	DmX-like protein 2	1139	VSVDSNLFVYSK	diphos-(1139)VSVDSNLFVYSK	116918	267153	1.11296e+06	546751	616995	172219	895341	583165	260349	620256	448371		895596	238319	547332	807078	8	7	7	8	0.44781	0.96862	0.651597	0.483681
Q8BPN8	Dmxl2	DmX-like protein 2	1280	FGNVDADSPVEETIQDHSALK	monophos-(1280)FGNVDADSPVEETIQDHSALK		727621	1.43527e+06	1.72386e+06	1.98e+06	275839	862049	599769	1.50173e+06	1.82517e+06			1.33399e+06	296346			7	4	5	6	0.843585	0.712665	0.421831	0.145576
Q8BPN8	Dmxl2	DmX-like protein 2	1396	TISVSGSTAKDTVTIGK	diphos-(1396)TISVSGSTAKDTVTIGK		258960			484513								446637		133854		2	2	1	3	0.795466	0.713661	#DIV/0!	#DIV/0!
Q8BPN8	Dmxl2	DmX-like protein 2	1396	TISVSGSTAKDTVTIGK	monophos-(1396)TISVSGSTAKDTVTIGK		415594											103398				1	1	1	1	#DIV/0!	#DIV/0!	#DIV/0!	#DIV/0!
Q8BPN8	Dmxl2	DmX-like protein 2	1852	NLASPEGTLATLGLK	monophos-(1852)NLASPEGTLATLGLK	36723.6	83076.9	462134	182530	428191	58422.5	255057	207530	141234	240594	135187	560575	650372	66777.9	179098	306669	8	8	8	8	0.493324	0.464333	0.888003	0.691024
Q8BPN8	Dmxl2	DmX-like protein 2	2013	ALLTPQDEECADGDTEVDVIAEQLK	monophos-(2013)ALLTPQDEECADGDTEVDVIAEQLK		53762.3															1	0	1	0	#DIV/0!	#DIV/0!	#DIV/0!	#DIV/0!
Q8BPN8	Dmxl2	DmX-like protein 2	2391	RQSESIAAPPVASEDMDK	monophos-(2391)RQSESIAAPPVASEDMDK													144793				0	1	0	1	#DIV/0!	#DIV/0!	#DIV/0!	#DIV/0!
Q8BPN8	Dmxl2	DmX-like protein 2	2633	KQSEVEADLGYPGGK	monophos-(2633)KQSEVEADLGYPGGK													305768				0	1	0	1	#DIV/0!	#DIV/0!	#DIV/0!	#DIV/0!
Q8BPN8	Dmxl2	DmX-like protein 2	2763	RMTSHPVHQYYLTGAQDGSVR	diphos-(2763)RMTSHPVHQYYLTGAQDGSVR													88146				0	1	0	1	#DIV/0!	#DIV/0!	#DIV/0!	#DIV/0!
Q8BW94	Dnah3	Dynein heavy chain 3, axonemal	1779	KLCLMSGEIIQMSSK	monophos-(1779)KLCLMSGEIIQMSSK											541195						0	1	1	0	#DIV/0!	#DIV/0!	#DIV/0!	#DIV/0!
P54103	Dnajc2	DnaJ homolog subfamily C member 2	56	KELSEESEDEELQLEEFPMLK	diphos-(56)KELSEESEDEELQLEEFPMLK			300119	202225		78917.8		488488	59677.4	81052.9	192041			108105	153400		4	5	5	4	0.0472052	0.18403	0.234102	0.691348
P54103	Dnajc2	DnaJ homolog subfamily C member 2	175	DNFFQVFSPVFER	monophos-(175)DNFFQVFSPVFER			55172.6			30980.7		43340.2			34764.6						3	1	2	2	#DIV/0!	#DIV/0!	0.693334	0.579979
P60904	Dnajc5	DnaJ homolog subfamily C member 5	5	QRSLSTSGESLYHVLGLDK	diphos-(5)QRSLSTSGESLYHVLGLDK		461348	3.29413e+06	3.58577e+06	6.38594e+06	1.06037e+06	2.07586e+06	6.20737e+06	113493		7.07604e+06	6.15888e+06	1.38509e+06	1.49552e+06	2.16193e+06	1.01182e+07	7	7	6	8	0.279997	0.648167	0.766803	0.810874
P60904	Dnajc5	DnaJ homolog subfamily C member 5	7	SLSTSGESLYHVLGLDK	monophos-(7)SLSTSGESLYHVLGLDK	132358	59823.3	2.14872e+07	7.13011e+06	2.83047e+07	1.26615e+07	1.70975e+07	6.53844e+06	2.11839e+06		6.21464e+07	8.99611e+06	5.07835e+06	1.2687e+06	5.15351e+06	1.38806e+07	8	7	7	8	0.0672369	0.781257	0.026151	0.719947
P60904	Dnajc5	DnaJ homolog subfamily C member 5	139	APEGEETEFYVSPEDLEAQLQSDER	diphos-(139)APEGEETEFYVSPEDLEAQLQSDER			1.64142e+06	758001	271251	118934	342830	691043			947837	557664		189597	929278	2.31916e+06	6	5	4	7	0.424429	0.412949	0.446556	0.529516
P60904	Dnajc5	DnaJ homolog subfamily C member 5	139	APEGEETEFYVSPEDLEAQLQSDER	monophos-(139)APEGEETEFYVSPEDLEAQLQSDER	2.39627e+06	1.74533e+06	2.25832e+07	1.02437e+07	6.76833e+06	4.49333e+06	1.27687e+07	6.16214e+06	4.79528e+06	2.1139e+06	3.02109e+07	1.62151e+07	1.92404e+06	5.49553e+06	2.14521e+07	1.76864e+07	8	8	8	8	0.286196	0.369342	0.272626	0.713532
P60904	Dnajc5	DnaJ homolog subfamily C member 5	164	EATDTPIVIQPASATETTQLTADSHPSYHTDGFN	monophos-(164)EATDTPIVIQPASATETTQLTADSHPSYHTDGFN				212925			194290		367925		1.1974e+06	436571			401564	296675	2	5	4	3	0.05325	0.279922	0.106411	0.377423
Q80TZ3	Dnajc6	Putative tyrosine-protein phosphatase auxilin	27	DSENKGASSPDMEPSYGGGLFDMVK	monophos-(27)DSENKGASSPDMEPSYGGGLFDMVK	165167	511853	1.5426e+06	385487		128917	1.0462e+06	253645	579711	1.29525e+06	368393	777544	1.03788e+06	282029	334188	491281	7	8	8	7	0.354569	0.768481	0.578749	0.409058
Q80TZ3	Dnajc6	Putative tyrosine-protein phosphatase auxilin	463	SRCEEDHAALVNQESEQSDDELLTLSSPHGNAEGDKPHGAK	diphos-(463)SRCEEDHAALVNQESEQSDDELLTLSSPHGNAEGDKPHGAK		142670	1.11262e+07		2.35303e+06				71977	55788.9	155741		1.18503e+06				3	4	5	2	0.00300738	0.339257	0.249913	0.889401
Q80TZ3	Dnajc6	Putative tyrosine-protein phosphatase auxilin	465	CEEDHAALVNQESEQSDDELLTLSSPHGNAEGDKPHGAK	diphos-(465)CEEDHAALVNQESEQSDDELLTLSSPHGNAEGDKPHGAK			1.20582e+06										554976				1	1	1	1	#DIV/0!	#DIV/0!	#DIV/0!	#DIV/0!
Q80TZ3	Dnajc6	Putative tyrosine-protein phosphatase auxilin	586	RTATSASASPTLR	monophos-(586)RTATSASASPTLR		452780	350024		440892				285014	587148			462095				3	3	4	2	0.241122	0.76289	0.166745	0.757553
Q80TZ3	Dnajc6	Putative tyrosine-protein phosphatase auxilin	587	TATSASASPTLR	diphos-(587)TATSASASPTLR							197948										1	0	0	1	#DIV/0!	#DIV/0!	#DIV/0!	#DIV/0!
Q05A62	Dnal1	Dynein light chain 1, axonemal	52	LSLSTNCIEK	monophos-(52)LSLSTNCIEK		199196			96705.6	37771.1	437044	197364			600280	304792	47903.2	89861.8	178034	427713	5	6	3	8	0.541157	0.494119	0.506272	0.158546
P39053	Dnm1	Dynamin-1	343	IEGSGDQIDTYELSGGAR	monophos-(343)IEGSGDQIDTYELSGGAR										292008							0	1	1	0	#DIV/0!	#DIV/0!	#DIV/0!	#DIV/0!
P39053	Dnm1	Dynamin-1	509	KTSGNQDEILVIR	monophos-(509)KTSGNQDEILVIR		925445								1.1967e+06			333528				1	2	2	1	#DIV/0!	#DIV/0!	#DIV/0!	#DIV/0!
Q8K1M6	Dnm1l	Dynamin-1-like protein	612	SKPIPIMPASPQK	monophos-(612)SKPIPIMPASPQK	2.05303e+06	3.32116e+06	2.12219e+06	2.97925e+06		1.87764e+06		3.46349e+06		2.38076e+06			742871	1.09357e+06	2.89964e+06	3.95581e+06	6	5	5	6	0.197636	0.5129	0.123335	0.720662
Q8BZ98	Dnm3	Dynamin-3	761	RSPPPSPTTQR	diphos-(761)RSPPPSPTTQR											93598.2						0	1	1	0	#DIV/0!	#DIV/0!	#DIV/0!	#DIV/0!
Q8BZ98	Dnm3	Dynamin-3	761	RSPPPSPTTQR	monophos-(761)RSPPPSPTTQR	196003	281667	1.64944e+06	764789	421873	422797			606918	1.01952e+06	4.21015e+06	1.75573e+06	357035	941258	300906		6	7	8	5	0.0588078	0.272722	0.00727066	0.12272
Q8BZ98	Dnm3	Dynamin-3	762	SPPPSPTTQR	diphos-(762)SPPPSPTTQR		106080															1	0	1	0	#DIV/0!	#DIV/0!	#DIV/0!	#DIV/0!
Q8R1A4	Dock7	Dedicator of cytokinesis protein 7	893	SRSLSNSNPDISGTPTSPDDEVR	diphos-(893)SRSLSNSNPDISGTPTSPDDEVR					856852								157482				1	1	0	2	#DIV/0!	#DIV/0!	#DIV/0!	#DIV/0!
Q8R1A4	Dock7	Dedicator of cytokinesis protein 7	926	SNSWVNTGPK	monophos-(926)SNSWVNTGPK					234192												1	0	0	1	#DIV/0!	#DIV/0!	#DIV/0!	#DIV/0!
Q8R1A4	Dock7	Dedicator of cytokinesis protein 7	1419	SPSGSAFGSQENLR	diphos-(1419)SPSGSAFGSQENLR					341948												1	0	0	1	#DIV/0!	#DIV/0!	#DIV/0!	#DIV/0!
Q8R1A4	Dock7	Dedicator of cytokinesis protein 7	1419	SPSGSAFGSQENLR	monophos-(1419)SPSGSAFGSQENLR					102764								108111				1	1	0	2	#DIV/0!	#DIV/0!	#DIV/0!	#DIV/0!
Q8BL99	Dopey1	Protein dopey-1	1137	ASSPDDDVQQVVFDLICK	monophos-(1137)ASSPDDDVQQVVFDLICK			168731	59087.8			118635					571352	94158.6				3	2	3	2	0.0509115	0.319425	0.0906487	0.484711
Q8BL99	Dopey1	Protein dopey-1	2012	VIPLLVNIMHYVVPYLRNHSAHNAPSYR	diphos-(2012)VIPLLVNIMHYVVPYLRNHSAHNAPSYR			1.10578e+07														1	0	1	0	#DIV/0!	#DIV/0!	#DIV/0!	#DIV/0!
Q66L44	Dos	Protein Dos	180	IATIHECDSGEASAAATPHPATTSKDSLAIFQPPGK	diphos-(180)IATIHECDSGEASAAATPHPATTSKDSLAIFQPPGK		42129									188524	737147				411569	1	3	3	1	#DIV/0!	#DIV/0!	#DIV/0!	#DIV/0!
Q66L44	Dos	Protein Dos	294	HASLDGASPYFK	diphos-(294)HASLDGASPYFK						98899.7											1	0	0	1	#DIV/0!	#DIV/0!	#DIV/0!	#DIV/0!
Q66L44	Dos	Protein Dos	294	HASLDGASPYFK	monophos-(294)HASLDGASPYFK	318264	509405	787435	729537	630899	816051		767823	580050	393187	767253	787837	1.1629e+06		903945	873460	7	7	8	6	0.480192	0.281564	0.935227	0.026436
Q66L44	Dos	Protein Dos	385	LEAAEAAGGASPETPPEHGISLGPEHAQQQDPQQEQDAEHAQCSYR	diphos-(385)LEAAEAAGGASPETPPEHGISLGPEHAQQQDPQQEQDAEHAQCSYR	254071	146284															2	0	2	0	#DIV/0!	#DIV/0!	#DIV/0!	#DIV/0!
Q66L44	Dos	Protein Dos	512	GAGDEVSELPAPARSPPR	monophos-(512)GAGDEVSELPAPARSPPR									903238								0	1	1	0	#DIV/0!	#DIV/0!	#DIV/0!	#DIV/0!
Q66L44	Dos	Protein Dos	613	RGDSVDCPPEGR	monophos-(613)RGDSVDCPPEGR	42773.8	129851							71591								2	1	3	0	#DIV/0!	#DIV/0!	#DIV/0!	#DIV/0!
Q61103	Dpf2	Zinc finger protein ubi-d4	137	VDDDSLGEFPVSNSR	monophos-(137)VDDDSLGEFPVSNSR			254011														1	0	1	0	#DIV/0!	#DIV/0!	#DIV/0!	#DIV/0!
Q9Z218	Dpp6	Dipeptidyl aminopeptidase-like protein 6	162	IPHGDPQSLDPPEVSNAKLQYAGWGPK	diphos-(162)IPHGDPQSLDPPEVSNAKLQYAGWGPK												114651					0	1	1	0	#DIV/0!	#DIV/0!	#DIV/0!	#DIV/0!
A6X919	Dpy19l1	Probable C-mannosyltransferase DPY19L1	21	SSPPPLSGASEVDAGELGSER	monophos-(21)SSPPPLSGASEVDAGELGSER		254215								567523			223038				1	2	2	1	#DIV/0!	#DIV/0!	#DIV/0!	#DIV/0!
O08553	Dpysl2	Dihydropyrimidinase-related protein 2	400	ISVGSDADLVIWDPDSVK	monophos-(400)ISVGSDADLVIWDPDSVK	182347	186571	540548		293365	518106	1.03479e+06	707859	746141	220947	730554		501955	537278	843510	1.71308e+06	7	7	6	8	0.331854	0.242128	0.291952	0.131281
O08553	Dpysl2	Dihydropyrimidinase-related protein 2	423	THNSALEYNIFEGMECR	monophos-(423)THNSALEYNIFEGMECR					69798.7												1	0	0	1	#DIV/0!	#DIV/0!	#DIV/0!	#DIV/0!
O08553	Dpysl2	Dihydropyrimidinase-related protein 2	496	GLYDGPVCEVSVTPK	diphos-(496)GLYDGPVCEVSVTPK	1.23536e+07	8.93493e+06	2.30792e+07	8.84451e+06	9.7779e+06	1.36297e+07	1.58296e+07	2.00611e+07	2.70853e+07	1.35854e+07	1.06829e+07	1.92125e+07	1.20055e+07	1.4303e+07	8.99442e+06	1.85336e+07	8	8	8	8	0.793018	0.602326	0.162734	0.641301
O08553	Dpysl2	Dihydropyrimidinase-related protein 2	496	GLYDGPVCEVSVTPK	monophos-(496)GLYDGPVCEVSVTPK	1.39842e+07	1.32785e+07	1.83543e+07	1.31932e+07	1.76262e+07	9.98587e+06	3.89547e+07	1.60616e+07	1.88891e+07	1.83927e+07	1.94472e+07	2.35382e+07	8.3629e+06	8.79133e+06	2.32316e+07	2.925e+07	8	8	8	8	0.564265	0.79882	0.00965176	0.694658
O08553	Dpysl2	Dihydropyrimidinase-related protein 2	511	TVTPASSAKTSPAK	diphos-(511)TVTPASSAKTSPAK	6.0138e+06	4.56446e+06	1.12674e+07	9.74216e+06	1.24752e+07	7.28623e+06	3.33415e+06	9.59614e+06	8.11293e+06	2.54324e+06	3.12541e+07	9.54553e+06	3.84558e+06	7.6038e+06	561155	6.74457e+06	8	8	8	8	0.0108383	0.840644	0.036939	0.277127
O08553	Dpysl2	Dihydropyrimidinase-related protein 2	520	TSPAKQQAPPVR	monophos-(520)TSPAKQQAPPVR	819393	318203	1.24572e+07	3.03384e+06	9.1781e+06	1.54125e+06	1.11405e+06	1.04552e+06	1.15656e+06	375308	3.27905e+06	1.18661e+07	3.66589e+06	2.40606e+06	1.39849e+06	5.37094e+06	8	8	8	8	0.581216	0.999485	0.148852	0.651146
O08553	Dpysl2	Dihydropyrimidinase-related protein 2	532	NLHQSGFSLSGAQIDDNIPRR	diphos-(532)NLHQSGFSLSGAQIDDNIPRR	4.27061e+06	4.70313e+06	9.77634e+06	1.30067e+07	9.0196e+06	6.53692e+06	2.27945e+07	1.37299e+07	7.93925e+06	5.09555e+06	1.33893e+07	1.75227e+07	5.79186e+06	1.18348e+07	1.11169e+07	1.95338e+07	8	8	8	8	0.698632	0.716948	0.585131	0.277181
O08553	Dpysl2	Dihydropyrimidinase-related protein 2	532	NLHQSGFSLSGAQIDDNIPR	monophos-(532)NLHQSGFSLSGAQIDDNIPR	2.19464e+07	1.07146e+07	3.16465e+07	3.80271e+07	2.24194e+07	3.09986e+07	7.4628e+07	1.22473e+07	2.52058e+07	1.41978e+07	2.64975e+07	4.61593e+07	2.1142e+07	2.01285e+07	3.6049e+07	4.47889e+07	8	8	8	8	0.177102	0.900228	0.194189	0.472662
Q62188	Dpysl3	Dihydropyrimidinase-related protein 3	81	GMTTVDDFFQGTKAALAGGTTMIIDHVVPEPESSLTEAYEK	diphos-(81)GMTTVDDFFQGTKAALAGGTTMIIDHVVPEPESSLTEAYEK												113498					0	1	1	0	#DIV/0!	#DIV/0!	#DIV/0!	#DIV/0!
Q62188	Dpysl3	Dihydropyrimidinase-related protein 3	496	GMYDGPVFDLTTTPKGGTPAGSTR	diphos-(496)GMYDGPVFDLTTTPKGGTPAGSTR	368556	212935	4.60932e+06	1.06469e+06	3.5645e+06	307622	3.29164e+06	3.47333e+06	1.23371e+06	491688	1.50766e+06	4.4541e+06	1.61532e+06	1.33343e+06	1.7739e+06	4.10861e+06	8	8	8	8	0.554097	0.954788	0.483061	0.396194
Q62188	Dpysl3	Dihydropyrimidinase-related protein 3	496	GMYDGPVFDLTTTPK	monophos-(496)GMYDGPVFDLTTTPK	994406	1.27594e+06	2.0146e+06	1.73902e+06	4.9174e+06	1.20534e+06	6.07331e+06	5.32003e+06	1.63407e+06	1.44626e+06	2.57869e+06	3.6667e+06	2.10692e+06	1.10554e+06	3.43732e+06	3.57234e+06	8	8	8	8	0.0748492	0.557322	0.0532602	0.0527303
Q62188	Dpysl3	Dihydropyrimidinase-related protein 3	511	GGTPAGSTRGSPTRPNPPVR	diphos-(511)GGTPAGSTRGSPTRPNPPVR	2.54347e+06	4.82714e+06	1.38754e+07	810291	9.41813e+06	901404	1.08757e+07	2.12668e+07	1.08072e+07	8.76932e+06	1.5868e+07	5.53592e+06	472564	5.77651e+06	2.35714e+06	1.25195e+07	8	8	8	8	0.412527	0.924889	0.485781	0.982823
Q62188	Dpysl3	Dihydropyrimidinase-related protein 3	511	GGTPAGSTRGSPTRPNPPVR	monophos-(511)GGTPAGSTRGSPTRPNPPVR	170778	579451	2.03495e+06		1.83188e+06		1.99621e+06	1.22472e+06	827357		843938	1.65374e+06	1.64405e+06		501042	1.85591e+06	6	6	6	6	0.477639	0.833523	0.651399	0.208369
Q62188	Dpysl3	Dihydropyrimidinase-related protein 3	520	GSPTRPNPPVR	monophos-(520)GSPTRPNPPVR	9.45049e+06	1.23989e+07	1.80591e+07	8.67602e+06	1.41197e+07	4.52632e+06	2.8044e+07	1.63602e+07	1.94189e+07	1.26925e+07	2.84381e+07	1.51876e+07	6.8461e+06	5.4504e+06	1.72051e+07	2.97084e+07	8	8	8	8	0.581255	0.483313	0.299624	0.951022
Q62188	Dpysl3	Dihydropyrimidinase-related protein 3	531	NLHQSGFSLSGTQVDEGVR	diphos-(531)NLHQSGFSLSGTQVDEGVR	142680		593275	466441	282369	195714		559125	245662		442265		348615	217332		655764	6	5	5	6	0.899311	0.940259	0.959103	0.989107
Q62188	Dpysl3	Dihydropyrimidinase-related protein 3	531	NLHQSGFSLSGTQVDEGVR	monophos-(531)NLHQSGFSLSGTQVDEGVR	374418	459770	1.27591e+06	303735	812953	132469	281438	817588	500800	239982	403271		472916				8	4	7	5	0.0786152	0.459292	0.84687	0.980925
O35098	Dpysl4	Dihydropyrimidinase-related protein 4	532	NLHQSGFSLSGSQADDHIAR	diphos-(532)NLHQSGFSLSGSQADDHIAR							413267										1	0	0	1	#DIV/0!	#DIV/0!	#DIV/0!	#DIV/0!
Q9EQF6	Dpysl5	Dihydropyrimidinase-related protein 5	505	EMGTPLADTPTRPVTR	diphos-(505)EMGTPLADTPTRPVTR		2.79053e+06	9.56692e+06	3.46716e+06	3.7364e+06	592891	7.44192e+06	2.79782e+06	3.30567e+06	3.06188e+06	1.68624e+06	7.051e+06	649862	2.2243e+06	2.75721e+06	1.72622e+06	7	8	7	8	0.241106	0.260783	0.520636	0.216406
Q9EQF6	Dpysl5	Dihydropyrimidinase-related protein 5	505	EMGTPLADTPTRPVTR	monophos-(505)EMGTPLADTPTRPVTR			343091														1	0	1	0	#DIV/0!	#DIV/0!	#DIV/0!	#DIV/0!
Q9EQF6	Dpysl5	Dihydropyrimidinase-related protein 5	526	DLHESSFSLSGSQIDDHVPKR	diphos-(526)DLHESSFSLSGSQIDDHVPKR		182104	4.73506e+06		2.94637e+06	141370	478248	4.07749e+06	698751			1.06095e+06	778348	604441		2.08138e+06	6	5	4	7	0.0325429	0.284702	0.445008	0.940212
Q9EQF6	Dpysl5	Dihydropyrimidinase-related protein 5	526	DLHESSFSLSGSQIDDHVPKR	monophos-(526)DLHESSFSLSGSQIDDHVPKR		1.171e+06	7.10598e+06	813720	2.13877e+06	437637	2.87454e+06	4.56326e+06	1.15855e+06	622701	801297		975359	133614	261655	3.77468e+06	7	7	6	8	0.132539	0.135688	0.330775	0.965039
Q9R0P5	Dstn	Destrin	151	LGGSLIVAFEGSPV	monophos-(151)LGGSLIVAFEGSPV			81747				371948	105747			82638.7	176277			238582	95065.4	3	4	3	4	0.23014	0.684712	0.303362	0.322807
Q9DD18	Dtd1	D-tyrosyl-tRNA(Tyr) deacylase 1	193	SASSGAEGDVSSEREP	diphos-(193)SASSGAEGDVSSEREP			1.38611e+06	615334			148064				327720	691410				570232	3	3	4	2	0.161324	0.645923	0.892859	0.333806
Q9DD18	Dtd1	D-tyrosyl-tRNA(Tyr) deacylase 1	193	SASSGAEGDVSSEREP	monophos-(193)SASSGAEGDVSSEREP	646879	1.24972e+06	2.55978e+06	1.90957e+06	464281	566965	5.40718e+06	409804	1.03689e+06	608970	1.05343e+06	2.45121e+06	394290	619071	296974	1.96765e+06	8	8	8	8	0.0539179	0.380867	0.0451708	0.80329
Q9D2N4	Dtna	Dystrobrevin alpha	566	SSPSHTISRPIPMPIR	monophos-(566)SSPSHTISRPIPMPIR	154733																1	0	1	0	#DIV/0!	#DIV/0!	#DIV/0!	#DIV/0!
Q9D2N4	Dtna	Dystrobrevin alpha	637	ELNSEVASETESTVDSEFSRPQFEDLAPSPTSEK	monophos-(637)ELNSEVASETESTVDSEFSRPQFEDLAPSPTSEK	67142.1									102594							1	1	2	0	#DIV/0!	#DIV/0!	#DIV/0!	#DIV/0!
Q9D7B1	Dus2	tRNA-dihydrouridine(20) synthase [NAD(P)+]-like	299	LLHAAQSSQEICEAFGLGAFYEETIRELDAR	diphos-(299)LLHAAQSSQEICEAFGLGAFYEETIRELDAR		302655															1	0	1	0	#DIV/0!	#DIV/0!	#DIV/0!	#DIV/0!
Q9JHU4	Dync1h1	Cytoplasmic dynein 1 heavy chain 1	4363	TDSTSDGRPAWMR	monophos-(4363)TDSTSDGRPAWMR			876497														1	0	1	0	#DIV/0!	#DIV/0!	#DIV/0!	#DIV/0!
O88485	Dync1i1	Cytoplasmic dynein 1 intermediate chain 1	57	ETEALLQSIGISPEPPLVPTPMSPSSK	monophos-(57)ETEALLQSIGISPEPPLVPTPMSPSSK				231911		69522.4					191922	200243	171121				2	3	3	2	0.0332797	0.727513	0.152988	0.121956
O88485	Dync1i1	Cytoplasmic dynein 1 intermediate chain 1	151	ETQTPLATHQSEEDEEDEEMVEPK	monophos-(151)ETQTPLATHQSEEDEEDEEMVEPK	3.17212e+06	9.2534e+06	6.97317e+06	2.37156e+06	1.20493e+06	1.25812e+06	5.69224e+06	2.12372e+06	1.20325e+07	1.30676e+07	4.01878e+06	4.04177e+06	2.77293e+06	1.82103e+06	5.94492e+06	7.01942e+06	8	8	8	8	0.385584	0.218324	0.156249	0.0644857
O88485	Dync1i1	Cytoplasmic dynein 1 intermediate chain 1	175	IGHDSELENQEK	monophos-(175)IGHDSELENQEK															226551		0	1	0	1	#DIV/0!	#DIV/0!	#DIV/0!	#DIV/0!
O88485	Dync1i1	Cytoplasmic dynein 1 intermediate chain 1	612	ANRADSEEEGAVELAA	monophos-(612)ANRADSEEEGAVELAA				1.13169e+06	1.11677e+06	474557				1.26561e+06		827367	797933		850696		3	4	3	4	0.40128	0.906108	0.893602	0.221961
Q8R1Q8	Dync1li1	Cytoplasmic dynein 1 light intermediate chain 1	192	DFQEYVEPGEDFPASPQRR	monophos-(192)DFQEYVEPGEDFPASPQRR	6.25708e+06	8.69559e+06	1.93263e+07	5.78846e+06	9.6816e+06	3.81705e+06	1.95275e+07	1.30708e+07	1.21674e+07	5.82382e+06	1.93859e+07	1.59299e+07	4.79311e+06	4.96986e+06	1.13381e+07	1.79245e+07	8	8	8	8	0.955706	0.799662	0.963886	0.73398
Q8R1Q8	Dync1li1	Cytoplasmic dynein 1 light intermediate chain 1	411	SVSSNVASVSPIPAGSK	monophos-(411)SVSSNVASVSPIPAGSK	940171	5.39181e+06	294169				889068		1.50396e+06	1.40925e+06			374829				4	3	5	2	0.13301	0.607336	0.270106	0.435827
Q8R1Q8	Dync1li1	Cytoplasmic dynein 1 light intermediate chain 1	504	KPASVSPTTPTSPTEGEAS	diphos-(504)KPASVSPTTPTSPTEGEAS	3.37168e+06	4.80654e+06	7.26097e+06	3.20114e+06	6.38698e+06	2.4269e+06	2.85283e+06	8.1183e+06	6.07019e+06	5.14347e+06	9.68104e+06	5.23593e+06	1.67039e+06	4.93343e+06	6.52307e+06	8.45588e+06	8	8	8	8	0.798525	0.331703	0.587252	0.726103
Q8R1Q8	Dync1li1	Cytoplasmic dynein 1 light intermediate chain 1	504	KPASVSPTTPTSPTEGEAS	monophos-(504)KPASVSPTTPTSPTEGEAS	4.71595e+06	3.84564e+06	9.73986e+06	3.24752e+06	3.44448e+06	1.85792e+06	7.35383e+06	3.15958e+06	6.37179e+06	2.51178e+06	1.28906e+07	2.85571e+06	1.76862e+06	1.60716e+06	5.56699e+06	4.21569e+06	8	8	8	8	0.362681	0.974174	0.132441	0.173649
Q6PDL0	Dync1li2	Cytoplasmic dynein 1 light intermediate chain 2	179	EFQDYIEPEEGCQGSPQRR	monophos-(179)EFQDYIEPEEGCQGSPQRR	2.16078e+06	2.92534e+06	9.74168e+06	769581	4.4382e+06	1.07846e+06	2.29815e+06	2.36225e+06	5.23823e+06	2536650	8.3667e+06	4.1312e+06	1.94336e+06	2.14546e+06	1.31056e+06	3.60793e+06	8	8	8	8	0.573979	0.740598	0.0146716	0.111196
Q6PDL0	Dync1li2	Cytoplasmic dynein 1 light intermediate chain 2	439	KTGSPGSPSAGGVQSTAK	monophos-(439)KTGSPGSPSAGGVQSTAK		100436	116462			52412.5		97343.9	20313.6	136762							4	2	4	2	0.115628	0.765887	0.845082	0.670765
Q6PDL0	Dync1li2	Cytoplasmic dynein 1 light intermediate chain 2	440	TGSPGSPSAGGVQSTAKK	diphos-(440)TGSPGSPSAGGVQSTAKK						112653											1	0	0	1	#DIV/0!	#DIV/0!	#DIV/0!	#DIV/0!
Q6PDL0	Dync1li2	Cytoplasmic dynein 1 light intermediate chain 2	477	KPDSMVTNSSTENEA	monophos-(477)KPDSMVTNSSTENEA	395877	1.27953e+06	696845	1.00791e+06	1.41317e+06	464379	619631		1.58287e+06	1.64646e+06	1.0082e+06			285570		754979	7	5	7	5	0.410228	0.4567	0.964742	0.17501
Q9D0M5	Dynll2	Dynein light chain 2, cytoplasmic	9	NADMSEDMQQDAVDCATQAMEK	monophos-(9)NADMSEDMQQDAVDCATQAMEK											135821			35875.6			0	2	1	1	#DIV/0!	#DIV/0!	#DIV/0!	#DIV/0!
Q61214	Dyrk1a	Dual specificity tyrosine-phosphorylation-regulated kinase 1A	317	IYQYIQSR	monophos-(317)IYQYIQSR	220474	859341	1.0184e+06	423610			1.26514e+06	643945	560146	1.03726e+06	599199	655687	330403	95252.7		788392	6	7	8	5	0.575534	0.428017	0.282037	0.819474
Q9Z188	Dyrk1b	Dual specificity tyrosine-phosphorylation-regulated kinase 1B	269	IYQYIQSR	monophos-(269)IYQYIQSR	220474	859341	1.0184e+06	423610			1.26514e+06	643945	560146	1.03726e+06	599199	655687	330403	95252.7		788392	6	7	8	5	0.575534	0.428017	0.282037	0.819474
Q8C008	Dzank1	Double zinc ribbon and ankyrin repeat-containing protein 1	758	FTQGLEDQLSPPGNR	monophos-(758)FTQGLEDQLSPPGNR													243604				0	1	0	1	#DIV/0!	#DIV/0!	#DIV/0!	#DIV/0!
Q7TPV2	Dzip3	E3 ubiquitin-protein ligase DZIP3	1096	SAQDGNNASPSHTASQPNAPQDPK	monophos-(1096)SAQDGNNASPSHTASQPNAPQDPK		160443	190257		97560.8					240506	126227						3	2	4	1	0.45965	0.582713	#DIV/0!	#DIV/0!
Q9D0V7	Ebag9	Receptor-binding cancer antigen expressed on SiSo cells	33	KLSGDQITLPTTVDYSSVPK	monophos-(33)KLSGDQITLPTTVDYSSVPK	67635.8	290183	3.91868e+06	339522	2.68881e+06	646334	1.8644e+06	1.47069e+06	242809		4.49169e+06	2.79755e+06	692278	188320	1.37656e+06	1.91876e+06	8	7	7	8	0.721608	0.733548	0.0390372	0.642855
Q8K2D3	Edc3	Enhancer of mRNA-decapping protein 3	124	SQDVAISPQQQQCSK	monophos-(124)SQDVAISPQQQQCSK									261343								0	1	1	0	#DIV/0!	#DIV/0!	#DIV/0!	#DIV/0!
O70251	Eef1b	Elongation factor 1-beta	78	YGPSSVEDTTGSGAADAKDDDDIDLFGSDDEEESEEAK	diphos-(78)YGPSSVEDTTGSGAADAKDDDDIDLFGSDDEEESEEAK											558512						0	1	1	0	#DIV/0!	#DIV/0!	#DIV/0!	#DIV/0!
O70251	Eef1b	Elongation factor 1-beta	78	YGPSSVEDTTGSGAADAK	monophos-(78)YGPSSVEDTTGSGAADAK		2.70791e+06	1.00166e+07	4.73791e+06	1.109e+06	765468	964446	3.97194e+06		285441	8.36088e+06	4.92444e+06	500158	1.46033e+06	2.75984e+06	1.07849e+07	7	7	6	8	0.609141	0.734638	0.889766	0.230572
P57776	Eef1d	Elongation factor 1-delta	123	ATAPQTQHVSPMR	monophos-(123)ATAPQTQHVSPMR	382445	2.19658e+06	575894	820465	488669	880063	1.04298e+06	597067	2.07889e+06	2.21031e+06	1.12327e+06	1.35965e+06	532075	384267	1.91773e+06	5.51828e+06	8	8	8	8	0.0144953	0.128806	0.0403643	0.910526
P57776	Eef1d	Elongation factor 1-delta	144	GATPAEDDEDKDIDLFGSDEEEEDK	monophos-(144)GATPAEDDEDKDIDLFGSDEEEEDK	149403	1.01559e+06	4.14928e+06	2.41029e+06	703698	517338	125398	4.18947e+06		1.20338e+06	4.56949e+06	3.48618e+06	358698	1.13272e+06	5.47092e+06	4.88866e+06	8	7	7	8	0.611626	0.188566	0.504964	0.812813
Q8VDY4	Efcab7	EF-hand calcium-binding domain-containing protein 7	218	NDQETFSSKGDTSHALLSTTR	diphos-(218)NDQETFSSKGDTSHALLSTTR													236826				0	1	0	1	#DIV/0!	#DIV/0!	#DIV/0!	#DIV/0!
Q9D8Y0	Efhd2	EF-hand domain-containing protein D2	61	RADLNQGIGEPQSPSR	monophos-(61)RADLNQGIGEPQSPSR	1.97319e+06	5.90998e+06	3.35005e+06	4.00394e+06	3.28276e+06	1.10323e+06	5.14578e+06	4.50137e+06	978004	1.65184e+06	8.38168e+06	4.17171e+06	834848	506321	700522	7.13204e+06	8	8	8	8	0.0918939	0.630242	0.952737	0.477498
P52795	Efnb1	Ephrin-B1	275	AAALSLSTLASPK	monophos-(275)AAALSLSTLASPK	67461.2	106322								72144.4					192154		2	2	3	1	0.398729	0.547527	#DIV/0!	#DIV/0!
P52800	Efnb2	Ephrin-B2	260	KHSPQHTTTLSLSTLATPK	diphos-(260)KHSPQHTTTLSLSTLATPK		845892	1.12194e+06		1.2847e+06		818876						914818				4	1	2	3	#DIV/0!	#DIV/0!	0.978704	0.9225
O35393	Efnb3	Ephrin-B3	271	GGSLGLGGGGGMGPR	monophos-(271)GGSLGLGGGGGMGPR					104593			336827								1.86614e+06	2	1	0	3	#DIV/0!	#DIV/0!	#DIV/0!	#DIV/0!
Q8BG67	Efr3a	Protein EFR3 homolog A	214	LGPPSSPSAADKEENPAVLAESCFR	monophos-(214)LGPPSSPSAADKEENPAVLAESCFR		151728															1	0	1	0	#DIV/0!	#DIV/0!	#DIV/0!	#DIV/0!
Q6ZQ18	Efr3b	Protein EFR3 homolog B	195	IVPSLLFNLQHVEEAESRSPSPLQAPEK	diphos-(195)IVPSLLFNLQHVEEAESRSPSPLQAPEK			249218														1	0	1	0	#DIV/0!	#DIV/0!	#DIV/0!	#DIV/0!
Q69ZW3	Ehbp1	EH domain-binding protein 1	163	ATDEDMQSLASLMSMK	diphos-(163)ATDEDMQSLASLMSMK	88885.9	162295	818279	435608		241542	731292	438275	155629	196669		479935	206184	559978	758682	420927	7	7	7	7	0.60884	0.886038	0.675335	0.278202
Q69ZW3	Ehbp1	EH domain-binding protein 1	209	ITEIVNQLNALSSLDEDQDDCIK	monophos-(209)ITEIVNQLNALSSLDEDQDDCIK	382250		723356	249121		210732	736445		548510		809785		216717	285176		900950	5	5	5	5	0.732996	0.618884	0.531984	0.695084
Q69ZW3	Ehbp1	EH domain-binding protein 1	240	SASSSEELINTLNFLDEAQK	diphos-(240)SASSSEELINTLNFLDEAQK		49438.8	130124					88362.5					65214.8	37421.8			3	2	2	3	0.651244	0.318179	0.309516	0.516068
Q69ZW3	Ehbp1	EH domain-binding protein 1	665	SQQSSARTSGSDDPGLSSSTDSAQALASLGK	diphos-(665)SQQSSARTSGSDDPGLSSSTDSAQALASLGK								630171									1	0	0	1	#DIV/0!	#DIV/0!	#DIV/0!	#DIV/0!
Q8BH64	Ehd2	EH domain-containing protein 2	425	GPDEAIEDGEEGSEDDAEWVVTK	monophos-(425)GPDEAIEDGEEGSEDDAEWVVTK		166672					179618			170897					389731		2	2	2	2	0.0752357	0.43131	0.0256016	0.468759
Q9QXY6	Ehd3	EH domain-containing protein 3	443	DKPMYDEIFYTLSPVDGK	monophos-(443)DKPMYDEIFYTLSPVDGK	1.19835e+06	1.52226e+06	5.60594e+06	2.48966e+06	3.91716e+06	1.93801e+06	8.24227e+06	5.66189e+06	2.21971e+06	1.48514e+06	6.08252e+06	5.61457e+06	1.89039e+06	2.12838e+06	5.2641e+06	6.10269e+06	8	8	8	8	0.640657	0.981919	0.804898	0.331367
Q9QXY6	Ehd3	EH domain-containing protein 3	473	SKLPNSVLGK	monophos-(473)SKLPNSVLGK									73658.2								0	1	1	0	#DIV/0!	#DIV/0!	#DIV/0!	#DIV/0!
Q5DW34	Ehmt1	Histone-lysine N-methyltransferase EHMT1	1052	NITHLQYCVCVDDCSSSTCMCGQLSMR	monophos-(1052)NITHLQYCVCVDDCSSSTCMCGQLSMR										2.52183e+06							0	1	1	0	#DIV/0!	#DIV/0!	#DIV/0!	#DIV/0!
Q8CHW4	Eif2b5	Translation initiation factor eIF-2B subunit epsilon	218	RFSFPLSLFQGSGDGVEIR	diphos-(218)RFSFPLSLFQGSGDGVEIR						555865											1	0	0	1	#DIV/0!	#DIV/0!	#DIV/0!	#DIV/0!
Q8CHW4	Eif2b5	Translation initiation factor eIF-2B subunit epsilon	537	AGSPQLDDIR	monophos-(537)AGSPQLDDIR	442469	789500	1.36188e+06	1.37548e+06	1.02243e+06	204531	4.52696e+07	1.14266e+06	1.02535e+06	1.09553e+06	1.1743e+06	990471	250270	296958	907286	1.92169e+06	8	8	8	8	1.77334e-09	0.355225	4.006e-11	0.368455
Q99L45	Eif2s2	Eukaryotic translation initiation factor 2 subunit 2	102	IESDAQEPAEPEDDLDIMLGNK	monophos-(102)IESDAQEPAEPEDDLDIMLGNK	48026.7	59569.3	227266			62409.5			46934.4					341867			4	2	4	2	0.185258	0.439064	0.221122	0.379509
Q8JZQ9	Eif3b	Eukaryotic translation initiation factor 3 subunit B	61	AKPAAQSEEETATSPAASPTPQSAER	diphos-(61)AKPAAQSEEETATSPAASPTPQSAER	493648	1.76342e+06	4.27672e+06	517488	1.09356e+06	211514	871975	470920	1.34006e+06	3.27097e+06	1.20669e+06	630512	1.04159e+06	484207	991544	650512	8	8	8	8	0.308414	0.985584	0.000990794	0.0941211
Q8JZQ9	Eif3b	Eukaryotic translation initiation factor 3 subunit B	61	AKPAAQSEEETATSPAASPTPQSAERSPSQEPSAPGK	monophos-(61)AKPAAQSEEETATSPAASPTPQSAERSPSQEPSAPGK	101925	275185	282726		154744			2.24342e+06	4.96117e+06	576311			3.70441e+06		1.80368e+06	4.14786e+06	5	5	5	5	0.218769	0.027599	0.614992	0.347963
Q8JZQ9	Eif3b	Eukaryotic translation initiation factor 3 subunit B	107	GHPSAGAEEEGGSDGSAAEAEPR	diphos-(107)GHPSAGAEEEGGSDGSAAEAEPR		1.12814e+06	4.2887e+06	398365	1.19773e+06		1.54904e+06			1.54386e+06	1.07195e+06	738361	637686	205273		715171	5	6	6	5	0.0213043	0.259652	0.0775853	0.344458
Q8JZQ9	Eif3b	Eukaryotic translation initiation factor 3 subunit B	107	GHPSAGAEEEGGSDGSAAEAEPR	monophos-(107)GHPSAGAEEEGGSDGSAAEAEPR		100247															1	0	1	0	#DIV/0!	#DIV/0!	#DIV/0!	#DIV/0!
Q8JZQ9	Eif3b	Eukaryotic translation initiation factor 3 subunit B	130	ALENGEADEPSFSDPEDFVDDVSEEELLGDVLK	diphos-(130)ALENGEADEPSFSDPEDFVDDVSEEELLGDVLK			89908.9														1	0	1	0	#DIV/0!	#DIV/0!	#DIV/0!	#DIV/0!
Q8JZQ9	Eif3b	Eukaryotic translation initiation factor 3 subunit B	130	ALENGEADEPSFSDPEDFVDDVSEEELLGDVLK	monophos-(130)ALENGEADEPSFSDPEDFVDDVSEEELLGDVLK			79650.9														1	0	1	0	#DIV/0!	#DIV/0!	#DIV/0!	#DIV/0!
Q8R1B4	Eif3c	Eukaryotic translation initiation factor 3 subunit C	33	QPLLLSEDEEDTKR	monophos-(33)QPLLLSEDEEDTKR	591320	2.6984e+06		1.99875e+06		796184			2.66149e+06	2.93883e+06	1.91018e+06			815138	1.33765e+06	3.19358e+06	4	6	6	4	0.848233	0.348316	0.548701	0.368456
Q9Z1D1	Eif3g	Eukaryotic translation initiation factor 3 subunit G	32	GIPLPTGDTSPEPELLPGDPLPPPK	diphos-(32)GIPLPTGDTSPEPELLPGDPLPPPK			695988	1.80631e+06	1.67676e+06			1.50264e+06	255461		1.92412e+06	1.92275e+06		591848	498884	2.37738e+06	4	6	5	5	0.348821	0.761698	0.998574	0.986695
Q9Z1D1	Eif3g	Eukaryotic translation initiation factor 3 subunit G	32	GIPLPTGDTSPEPELLPGDPLPPPK	monophos-(32)GIPLPTGDTSPEPELLPGDPLPPPK	993031	1.49427e+06	352665	2.18905e+06	1.88642e+06	2.72146e+06	5.3493e+06	2.74478e+06	1.49919e+06	771433	8.50229e+06	5.24548e+06	977245	1.42817e+06	4.09393e+06	8.59591e+06	8	8	8	8	0.0578981	0.211089	0.772579	0.537118
Q9DBZ5	Eif3k	Eukaryotic translation initiation factor 3 subunit K	204	IDFDSVSSIMASSQ	monophos-(204)IDFDSVSSIMASSQ											95326.6						0	1	1	0	#DIV/0!	#DIV/0!	#DIV/0!	#DIV/0!
Q8BGD9	Eif4b	Eukaryotic translation initiation factor 4B	92	SPPYTAFLGNLPYDVTEDSIK	monophos-(92)SPPYTAFLGNLPYDVTEDSIK											375883						0	1	1	0	#DIV/0!	#DIV/0!	#DIV/0!	#DIV/0!
Q8BGD9	Eif4b	Eukaryotic translation initiation factor 4B	200	ARPTTDSFDDYPPR	monophos-(200)ARPTTDSFDDYPPR		2.11766e+06															1	0	1	0	#DIV/0!	#DIV/0!	#DIV/0!	#DIV/0!
Q8BGD9	Eif4b	Eukaryotic translation initiation factor 4B	417	SRTGSESSQTGASATSGR	diphos-(417)SRTGSESSQTGASATSGR	6868.87																1	0	1	0	#DIV/0!	#DIV/0!	#DIV/0!	#DIV/0!
Q8BGD9	Eif4b	Eukaryotic translation initiation factor 4B	419	TGSESSQTGASATSGR	monophos-(419)TGSESSQTGASATSGR						16159.8					46979.2						1	1	1	1	#DIV/0!	#DIV/0!	#DIV/0!	#DIV/0!
Q8BGD9	Eif4b	Eukaryotic translation initiation factor 4B	444	SLENETLNKEEDCHSPTSKPPKPDQPLK	monophos-(444)SLENETLNKEEDCHSPTSKPPKPDQPLK		2.46425e+06							1.42963e+06	1.39682e+06						1.61815e+06	1	3	3	1	#DIV/0!	#DIV/0!	#DIV/0!	#DIV/0!
Q8BGD9	Eif4b	Eukaryotic translation initiation factor 4B	494	SQSSDTEQPSPTSGGGK	diphos-(494)SQSSDTEQPSPTSGGGK	149373	619142		719676			655397		228801	292934	73646.5	281496	375061	74795.3	507881		4	7	7	4	0.262592	0.0541468	0.86945	0.6774
Q8BGD9	Eif4b	Eukaryotic translation initiation factor 4B	494	SQSSDTEQPSPTSGGGK	monophos-(494)SQSSDTEQPSPTSGGGK	703256								3.5446e+06								1	1	2	0	#DIV/0!	#DIV/0!	#DIV/0!	#DIV/0!
Q8BGD9	Eif4b	Eukaryotic translation initiation factor 4B	592	YAALSVDGEDEDEGDDCTE	monophos-(592)YAALSVDGEDEDEGDDCTE				772685		408698	1.5126e+06	572435			2.34611e+06	538869		922846		836708	4	4	3	5	0.429399	0.492337	0.146299	0.47626
Q6NZJ6	Eif4g1	Eukaryotic translation initiation factor 4 gamma 1	1075	ITKPGSIDSNNQLFAPGGR	monophos-(1075)ITKPGSIDSNNQLFAPGGR	153636	361978				121525	263362							85157.5			4	1	2	3	#DIV/0!	#DIV/0!	0.516298	0.405215
Q6NZJ6	Eif4g1	Eukaryotic translation initiation factor 4 gamma 1	1186	SFSKEVEER	monophos-(1186)SFSKEVEER	462825	747792			299704	109929	1.60551e+06							199709	663620		5	2	2	5	0.78946	0.658748	0.482334	0.951669
Q6NZJ6	Eif4g1	Eukaryotic translation initiation factor 4 gamma 1	1223	EATLPPVSPPK	diphos-(1223)EATLPPVSPPK					188123												1	0	0	1	#DIV/0!	#DIV/0!	#DIV/0!	#DIV/0!
Q80XI3	Eif4g3	Eukaryotic translation initiation factor 4 gamma 3	264	TSSPTSLPPLAR	monophos-(264)TSSPTSLPPLAR	2.58063e+06	2.66482e+06	1.59971e+06			1.13411e+06	4.87313e+06		4.22602e+06						2.23535e+06	4.42834e+06	5	3	4	4	0.90782	0.330269	0.438445	0.71445
Q80XI3	Eif4g3	Eukaryotic translation initiation factor 4 gamma 3	462	EMQDKAESESDGQAEETADPQSLHSGR	diphos-(462)EMQDKAESESDGQAEETADPQSLHSGR		236487	307723														2	0	2	0	#DIV/0!	#DIV/0!	#DIV/0!	#DIV/0!
Q80XI3	Eif4g3	Eukaryotic translation initiation factor 4 gamma 3	1148	GSSKDLLDNQSQEEQR	monophos-(1148)GSSKDLLDNQSQEEQR						873372											1	0	0	1	#DIV/0!	#DIV/0!	#DIV/0!	#DIV/0!
P59325	Eif5	Eukaryotic translation initiation factor 5	7	SVSDQFYR	monophos-(7)SVSDQFYR	78981.6	84641.1	143611						141814		196645						3	2	5	0	0.783841	0.140909	#DIV/0!	#DIV/0!
P59325	Eif5	Eukaryotic translation initiation factor 5	381	EAEEESSGGEEEDEDENIEVVYSK	diphos-(381)EAEEESSGGEEEDEDENIEVVYSK			3.86286e+06					1.13102e+06			5.36651e+06			672189			2	2	2	2	0.671047	0.865216	0.377093	0.0420117
P59325	Eif5	Eukaryotic translation initiation factor 5	381	EAEEESSGGEEEDEDENIEVVYSK	monophos-(381)EAEEESSGGEEEDEDENIEVVYSK			386923								434954			329073			1	2	2	1	#DIV/0!	#DIV/0!	#DIV/0!	#DIV/0!
Q05D44	Eif5b	Eukaryotic translation initiation factor 5B	126	TARPNSEAPLSGSEDADDSNKLSK	diphos-(126)TARPNSEAPLSGSEDADDSNKLSK			453453											98734.7			1	1	1	1	#DIV/0!	#DIV/0!	#DIV/0!	#DIV/0!
Q05D44	Eif5b	Eukaryotic translation initiation factor 5B	126	TARPNSEAPLSGSEDADDSNK	monophos-(126)TARPNSEAPLSGSEDADDSNK									226789		288092						0	2	2	0	#DIV/0!	#DIV/0!	#DIV/0!	#DIV/0!
Q05D44	Eif5b	Eukaryotic translation initiation factor 5B	206	NKSVPTVDSGNEDDDSSFK	monophos-(206)NKSVPTVDSGNEDDDSSFK					167610												1	0	0	1	#DIV/0!	#DIV/0!	#DIV/0!	#DIV/0!
Q05D44	Eif5b	Eukaryotic translation initiation factor 5B	208	SVPTVDSGNEDDDSSFK	monophos-(208)SVPTVDSGNEDDDSSFK	795810	1.26796e+06		878331	529212	528067	1.05262e+06	940477	1.77466e+06	1.34936e+06		665320	342316	771659	859982	1.0451e+06	7	7	6	8	0.197205	0.580553	0.266109	0.0693092
Q60899	Elavl2	ELAV-like protein 2	111	VSYARPSSASIR	monophos-(111)VSYARPSSASIR		250388															1	0	1	0	#DIV/0!	#DIV/0!	#DIV/0!	#DIV/0!
Q60899	Elavl2	ELAV-like protein 2	209	TNQAILSQLYQSPNR	monophos-(209)TNQAILSQLYQSPNR	160743	201190	727671		377971	196006	609092	473703	337366	168043	440537	198842	215925	258564	464739	247194	7	8	7	8	0.0944996	0.275698	0.412494	0.701796
Q60900	Elavl3	ELAV-like protein 3	111	VSYARPSSASIR	monophos-(111)VSYARPSSASIR		250388															1	0	1	0	#DIV/0!	#DIV/0!	#DIV/0!	#DIV/0!
Q61701	Elavl4	ELAV-like protein 4	34	NCPSPMQTGAATDDSK	monophos-(34)NCPSPMQTGAATDDSK	608637	1.19694e+06	1.91632e+06	278884	626067	391625	629695	727029	852167	633511	1.82834e+06	489860	393888	511706	538586	793422	8	8	8	8	0.731398	0.868515	0.00114658	0.11306
Q61701	Elavl4	ELAV-like protein 4	123	VSYARPSSASIR	monophos-(123)VSYARPSSASIR		250388															1	0	1	0	#DIV/0!	#DIV/0!	#DIV/0!	#DIV/0!
Q61701	Elavl4	ELAV-like protein 4	221	SSQALLSQLYQSPNR	monophos-(221)SSQALLSQLYQSPNR	180377	151617	221187		862425	125142	265529	198496	141157		245799	266742	152718	149191	154061	272733	7	7	6	8	0.00268591	0.405859	0.0033446	0.446128
Q8C8T7	Elfn1	Protein ELFN1	626	HHSVEAAPGPPR	monophos-(626)HHSVEAAPGPPR			169497														1	0	1	0	#DIV/0!	#DIV/0!	#DIV/0!	#DIV/0!
Q68FM6	Elfn2	Protein phosphatase 1 regulatory subunit 29	619	QLSADAAVSR	monophos-(619)QLSADAAVSR	410499	594069	790465	392526	404461	190812	616053		616966	623793	757112		214328		662947	602794	7	6	7	6	0.946066	0.39706	0.462637	0.166888
Q9CZX9	Emc4	ER membrane protein complex subunit 4	31	SDRGSGQGDSLYPVGYLDK	monophos-(31)SDRGSGQGDSLYPVGYLDK					147062		100453				145420						2	1	1	2	#DIV/0!	#DIV/0!	#DIV/0!	#DIV/0!
O08579	Emd	Emerin	136	DDIFSSLEEEGKDR	monophos-(136)DDIFSSLEEEGKDR		174043															1	0	1	0	#DIV/0!	#DIV/0!	#DIV/0!	#DIV/0!
Q03173	Enah	Protein enabled homolog	94	EDANVFASAMMHALEVLNSQEAAQSKVTATQDSTNLR	diphos-(94)EDANVFASAMMHALEVLNSQEAAQSKVTATQDSTNLR								182310								572467	1	1	0	2	#DIV/0!	#DIV/0!	#DIV/0!	#DIV/0!
Q03173	Enah	Protein enabled homolog	349	NSRPSSPVNTPSSQPPAAK	monophos-(349)NSRPSSPVNTPSSQPPAAK	410695	722193	1.72735e+06	236196		306189	304595	567822	1.25381e+06	621297	863525	462448	128549	139431		500304	7	7	8	6	0.531611	0.863104	0.042706	0.0357854
Q03173	Enah	Protein enabled homolog	635	VSRVEDGSFPGGGNTGSVSLASSK	diphos-(635)VSRVEDGSFPGGGNTGSVSLASSK												330490					0	1	1	0	#DIV/0!	#DIV/0!	#DIV/0!	#DIV/0!
P17182	Eno1	Alpha-enolase	32	AAVPSGASTGIYEALELR	monophos-(32)AAVPSGASTGIYEALELR	52943.3	137353	341420		418343	159059	239302	493399	119632	51520.4	219211	238001	164970	45001.5	183605	364754	7	8	7	8	0.29206	0.216605	0.398536	0.200406
P17182	Eno1	Alpha-enolase	253	SGKYDLDFK	monophos-(253)SGKYDLDFK			167934														1	0	1	0	#DIV/0!	#DIV/0!	#DIV/0!	#DIV/0!
P17182	Eno1	Alpha-enolase	256	YDLDFKSPDDPSR	monophos-(256)YDLDFKSPDDPSR	2.31506e+06	2.94471e+06	7.58947e+06	1.69248e+06	2.2817e+06	1.42573e+06	4.92154e+06	5.50713e+06	4.46831e+06	2.06481e+06	1.04063e+07	4.21063e+06	943904	1.46994e+06	4.12515e+06	6.19933e+06	8	8	8	8	0.399031	0.631272	0.324723	0.412902
P17183	Eno2	Gamma-enolase	32	AAVPSGASTGIYEALELR	monophos-(32)AAVPSGASTGIYEALELR	52943.3	137353	341420		418343	159059	239302	493399	119632	51520.4	219211	238001	164970	45001.5	183605	364754	7	8	7	8	0.29206	0.216605	0.398536	0.200406
P17183	Eno2	Gamma-enolase	202	DATNVGDEGGFAPNILENSEALELVK	monophos-(202)DATNVGDEGGFAPNILENSEALELVK			162854								74795						1	1	2	0	#DIV/0!	#DIV/0!	#DIV/0!	#DIV/0!
P17183	Eno2	Gamma-enolase	256	YDLDFKSPADPSR	monophos-(256)YDLDFKSPADPSR			166511					311487	65564.9	90510.2	255846					227591	2	4	4	2	0.725589	0.401708	0.922968	0.145377
P21550	Eno3	Beta-enolase	32	AAVPSGASTGIYEALELR	monophos-(32)AAVPSGASTGIYEALELR	52943.3	137353	341420		418343	159059	239302	493399	119632	51520.4	219211	238001	164970	45001.5	183605	364754	7	8	7	8	0.29206	0.216605	0.398536	0.200406
P06802	Enpp1	Ectonucleotide pyrophosphatase/phosphodiesterase family member 1	21	ELESPAAASLLAPMDLGEEPLEK	diphos-(21)ELESPAAASLLAPMDLGEEPLEK								238919									1	0	0	1	#DIV/0!	#DIV/0!	#DIV/0!	#DIV/0!
Q8CHI8	Ep400	E1A-binding protein p400	2297	QLLELPLNLTIVSPAHTPNWDLVSDVVNSCSRIYR	diphos-(2297)QLLELPLNLTIVSPAHTPNWDLVSDVVNSCSRIYR				68135.5									190924				1	1	1	1	#DIV/0!	#DIV/0!	#DIV/0!	#DIV/0!
Q9Z2H5	Epb41l1	Band 4.1-like protein 1	13	AQEETPQQPEAAAAVTTPVTPAGHSHPETNSNEK	diphos-(13)AQEETPQQPEAAAAVTTPVTPAGHSHPETNSNEK													53555.8				0	1	0	1	#DIV/0!	#DIV/0!	#DIV/0!	#DIV/0!
Q9Z2H5	Epb41l1	Band 4.1-like protein 1	47	HLTQQDTRPAEQSLDMDDKDYSEADGLSER	monophos-(47)HLTQQDTRPAEQSLDMDDKDYSEADGLSER			1.22219e+06										149919				1	1	1	1	#DIV/0!	#DIV/0!	#DIV/0!	#DIV/0!
Q9Z2H5	Epb41l1	Band 4.1-like protein 1	375	LVSPEPPPK	monophos-(375)LVSPEPPPK	366145	847542	1.02613e+06	609391	289822	148519	1.13237e+06		842683	1.20679e+06	840233	571186	271934	173430	542294	572153	7	8	8	7	0.718965	0.983735	0.515988	0.0499119
Q9Z2H5	Epb41l1	Band 4.1-like protein 1	465	SEAEEGEVRTPTK	diphos-(465)SEAEEGEVRTPTK		311310	526902	638157						301251		725102					3	2	5	0	0.426147	0.923087	#DIV/0!	#DIV/0!
Q9Z2H5	Epb41l1	Band 4.1-like protein 1	478	IKELKPEQETTPR	monophos-(478)IKELKPEQETTPR	1.12248e+06	4.03032e+06	3.05912e+06	311954	1.17095e+06	241392	923407		389685	3.57905e+06	1.49603e+06	1.58027e+06	2.50512e+06	117852	496919	1.85592e+06	7	8	8	7	0.602731	0.943368	0.253882	0.173058
Q9Z2H5	Epb41l1	Band 4.1-like protein 1	506	HQASINELKR	monophos-(506)HQASINELKR		2.3796e+06	180306	326723	306399								389913				4	1	3	2	#DIV/0!	#DIV/0!	0.0678761	0.551053
Q9Z2H5	Epb41l1	Band 4.1-like protein 1	536	RLPSSPASPSPK	diphos-(536)RLPSSPASPSPK	975684	1.78076e+06	2.83348e+06	1.36953e+06	1.90606e+06	485101	3.39522e+06	707903	2.0316e+06	3.35427e+06	1.74895e+06	1.99276e+06	2.38289e+06	679752	1.38793e+06	2.33317e+06	8	8	8	8	0.496621	0.510177	0.454763	0.450471
Q9Z2H5	Epb41l1	Band 4.1-like protein 1	536	RLPSSPASPSPK	monophos-(536)RLPSSPASPSPK	227658	509807	934602	256726					550801	803641		514215	262285			556217	4	5	7	2	0.330376	0.759618	0.908089	0.532185
Q9Z2H5	Epb41l1	Band 4.1-like protein 1	561	EGSEEKVKPPRPR	monophos-(561)EGSEEKVKPPRPR					77233.8												1	0	0	1	#DIV/0!	#DIV/0!	#DIV/0!	#DIV/0!
Q9Z2H5	Epb41l1	Band 4.1-like protein 1	638	SLPELDRDK	monophos-(638)SLPELDRDK		1.06118e+07											111375				1	1	1	1	#DIV/0!	#DIV/0!	#DIV/0!	#DIV/0!
Q9Z2H5	Epb41l1	Band 4.1-like protein 1	662	GPSSQEDESGGLEDSPDRGACSTPEMPQFESVK	diphos-(662)GPSSQEDESGGLEDSPDRGACSTPEMPQFESVK	368412	1.17874e+06	2.64384e+06	834453	2.31188e+06	193567	1.65541e+06		1.57878e+06	799788		541116		351903	412291		7	5	7	5	0.245307	0.243266	0.636165	0.768645
Q9Z2H5	Epb41l1	Band 4.1-like protein 1	662	GPSSQEDESGGLEDSPDR	monophos-(662)GPSSQEDESGGLEDSPDR	432439	132650	972087	487983	319317	130895	2.16022e+06		750513	1.13857e+06	862592	630812	276186	403198	2.58682e+06	942226	7	8	8	7	0.982625	0.454908	0.00903562	0.473262
Q9Z2H5	Epb41l1	Band 4.1-like protein 1	680	GACSTPEMPQFESVK	diphos-(680)GACSTPEMPQFESVK							654519							230234			1	1	0	2	#DIV/0!	#DIV/0!	#DIV/0!	#DIV/0!
Q9Z2H5	Epb41l1	Band 4.1-like protein 1	680	GACSTPEMPQFESVK	monophos-(680)GACSTPEMPQFESVK	240603	548986	718168			242510	277503		438218	662699	457023			250244	436929		5	5	6	4	0.462705	0.719992	0.324368	0.0591041
Q9Z2H5	Epb41l1	Band 4.1-like protein 1	779	SLSPIIGK	monophos-(779)SLSPIIGK	84508.2	202376	272890	330744	62535	148269	432552	171150					125672		171950	209156	8	3	4	7	0.20609	0.57665	0.944822	0.644957
O70318	Epb41l2	Band 4.1-like protein 2	83	QRSYNLVVAK	monophos-(83)QRSYNLVVAK			656938	387347	103679	87237.6	446147	318091			414383		85317	118050	161077		6	4	3	7	0.57833	0.300799	0.766323	0.0160516
O70318	Epb41l2	Band 4.1-like protein 2	99	EPTQADVEDQILGKEESLPEEESR	monophos-(99)EPTQADVEDQILGKEESLPEEESR	173250	198214	192866			123530			237934							263270	4	2	4	2	0.730021	0.0420451	0.0713455	0.887092
O70318	Epb41l2	Band 4.1-like protein 2	188	EVQTSELKAEVASQK	monophos-(188)EVQTSELKAEVASQK					141637								112419				1	1	0	2	#DIV/0!	#DIV/0!	#DIV/0!	#DIV/0!
O70318	Epb41l2	Band 4.1-like protein 2	542	SLDGAPIGVVDQSPPGEGSVPGPGVISYTTIQDGR	monophos-(542)SLDGAPIGVVDQSPPGEGSVPGPGVISYTTIQDGR		95161.5	194448					345031	146071		232994					877404	3	3	4	2	0.180439	0.439691	0.0161509	0.34102
Q9WV92	Epb41l3	Band 4.1-like protein 3	48	QQPALEQFPEAAAHSTPVKR	monophos-(48)QQPALEQFPEAAAHSTPVKR		252793	490673						228350	394767							2	2	4	0	0.777245	0.718704	#DIV/0!	#DIV/0!
Q9WV92	Epb41l3	Band 4.1-like protein 3	83	QLEYQQFEDDKLSQR	monophos-(83)QLEYQQFEDDKLSQR		1.75791e+06		1.08058e+06		509519	2.78832e+06	193469	591329	504196	263289			566458			5	4	5	4	0.00944641	0.167233	0.210025	0.780605
Q9WV92	Epb41l3	Band 4.1-like protein 3	425	RASALIDRPAPYFER	monophos-(425)RASALIDRPAPYFER			1.15511e+06		879664		1.24892e+06	1.13977e+06	722370	189620	505024		906899				4	4	4	4	0.302621	0.0231292	0.214657	0.120724
Q9WV92	Epb41l3	Band 4.1-like protein 3	450	SLDGASVSENHEIYMK	diphos-(450)SLDGASVSENHEIYMK		231450			837673		310324			306309				96684.7			3	2	2	3	0.606086	0.39016	0.195337	0.644473
Q9WV92	Epb41l3	Band 4.1-like protein 3	450	SLDGASVSENHEIYMK	monophos-(450)SLDGASVSENHEIYMK	195834	452659	235966	339001	949476	80569.7	61678.5	131290	381420	720238			335786		189232		8	4	6	6	0.722208	0.559921	0.226359	0.555351
Q9WV92	Epb41l3	Band 4.1-like protein 3	466	DSVSAAEVGTGQYATTK	monophos-(466)DSVSAAEVGTGQYATTK	249748		415338	145980		154363	305513	285056		579327	329620			143084			6	3	5	4	0.142647	0.402163	0.306169	0.224638
Q9WV92	Epb41l3	Band 4.1-like protein 3	483	GISQTNLITTVTPEKK	diphos-(483)GISQTNLITTVTPEKK	894275	2.17221e+06	3.45576e+06	2.39852e+06	2.98618e+06	1.16473e+06	3.15875e+06	4.43935e+06	1.45173e+06	3.003e+06	1.82166e+06	2.40964e+06	2.23761e+06	1.37919e+06	1.7356e+06	3.64027e+06	8	8	8	8	0.308747	0.468899	0.385946	0.447355
Q9WV92	Epb41l3	Band 4.1-like protein 3	483	GISQTNLITTVTPEKK	monophos-(483)GISQTNLITTVTPEKK	329707	1.02081e+06	1.91126e+06	1.57959e+06	417188	788089	2.43867e+06	1.50406e+06	577766	1.30169e+06	862201	2.18379e+06	1.89277e+06	527038	589385	1.69572e+06	8	8	8	8	0.765396	0.899798	0.698155	0.975915
Q9WV92	Epb41l3	Band 4.1-like protein 3	528	TDSERTDTAADGETSATESDQEEDAEIK	monophos-(528)TDSERTDTAADGETSATESDQEEDAEIK							646234										1	0	0	1	#DIV/0!	#DIV/0!	#DIV/0!	#DIV/0!
Q9WV92	Epb41l3	Band 4.1-like protein 3	533	TDTAADGETSATESDQEEDAEIKAQDLDK	diphos-(533)TDTAADGETSATESDQEEDAEIKAQDLDK			2.70281e+06	1.142e+06	448980		1.16548e+07				772867	484532	144766	1.02029e+06	63960.5	1.61162e+06	4	6	4	6	0.000243379	0.293547	0.0307374	0.549985
Q9WV92	Epb41l3	Band 4.1-like protein 3	716	DEVDAAESTPTDRR	monophos-(716)DEVDAAESTPTDRR		119530															1	0	1	0	#DIV/0!	#DIV/0!	#DIV/0!	#DIV/0!
Q9WV92	Epb41l3	Band 4.1-like protein 3	794	VESTSVGSISPGGAK	monophos-(794)VESTSVGSISPGGAK					361701	120650	582004			388962			151303	127195	281527		3	4	1	6	0.319798	0.416365	#DIV/0!	#DIV/0!
Q9WV92	Epb41l3	Band 4.1-like protein 3	913	VVVHKETEITPEDGED	monophos-(913)VVVHKETEITPEDGED					204044								354449				1	1	0	2	#DIV/0!	#DIV/0!	#DIV/0!	#DIV/0!
Q80VP1	Epn1	Epsin-1	410	TALPTSGSSTGELELLAGEVPAR	diphos-(410)TALPTSGSSTGELELLAGEVPAR	797292	2.61448e+06	5.28838e+06	6.24715e+06	1.4108e+06	2.05312e+06	3.85849e+06	4.21744e+06	1.24981e+06	1.97953e+06	4.30716e+06	5.69206e+06	1.70569e+06	2.79848e+06	5.59753e+06	4.00276e+06	8	8	8	8	0.805193	0.909555	0.335902	0.733373
Q80VP1	Epn1	Epsin-1	410	TALPTSGSSTGELELLAGEVPAR	monophos-(410)TALPTSGSSTGELELLAGEVPAR	2.19821e+06	3.1388e+06	3.4682e+06	7.60113e+06	4.09608e+06	3.16067e+06	1.17487e+07	6.08544e+06	3.79986e+06	4.22618e+06	5.91462e+06	7.23987e+06	2.93589e+06	3.71097e+06	1.34091e+07	8.04981e+06	8	8	8	8	0.842438	0.566618	0.0790524	0.241736
Q80VP1	Epn1	Epsin-1	433	SPGAFDMSGVGGSLAESVGSPPPAATPTPTPPTR	diphos-(433)SPGAFDMSGVGGSLAESVGSPPPAATPTPTPPTR	274099	109320	348040		556649	92424.6		240808	492716	356039	422536	264776	133457	107799		343187	6	7	7	6	0.67023	0.714367	0.390648	0.374012
Q80VP1	Epn1	Epsin-1	433	SPGAFDMSGVGGSLAESVGSPPPAATPTPTPPTR	monophos-(433)SPGAFDMSGVGGSLAESVGSPPPAATPTPTPPTR	127968	88753	1.14908e+06	542804	670379	164008	620561	355896	312002		1.37658e+06	735661	260090			810536	8	5	7	6	0.555768	0.320564	0.166195	0.552278
Q80VP1	Epn1	Epsin-1	468	TPESFLGPNAALVDLDSLVSRPGPTPPGSK	diphos-(468)TPESFLGPNAALVDLDSLVSRPGPTPPGSK											74734.1						0	1	1	0	#DIV/0!	#DIV/0!	#DIV/0!	#DIV/0!
Q80VP1	Epn1	Epsin-1	468	TPESFLGPNAALVDLDSLVSRPGPTPPGSK	monophos-(468)TPESFLGPNAALVDLDSLVSRPGPTPPGSK				237964							106117						1	1	2	0	#DIV/0!	#DIV/0!	#DIV/0!	#DIV/0!
Q8CHU3	Epn2	Epsin-2	170	GSSQPNLSTSYSEQEYGK	diphos-(170)GSSQPNLSTSYSEQEYGK					144705												1	0	0	1	#DIV/0!	#DIV/0!	#DIV/0!	#DIV/0!
Q8CHU3	Epn2	Epsin-2	170	GSSQPNLSTSYSEQEYGK	monophos-(170)GSSQPNLSTSYSEQEYGK	1.6753e+06	2.52396e+06	2.76642e+06	1.08571e+06	1.98068e+06	1026000	1.81844e+06	600741	2.47318e+06	1.4381e+06	3.00987e+06	778921	835796	1.02125e+06	1.40668e+06	2.25485e+06	8	8	8	8	0.800244	0.936023	0.395313	0.118771
Q8CHU3	Epn2	Epsin-2	188	AGGSPASYHGSTSPR	diphos-(188)AGGSPASYHGSTSPR	140051	290990	629791	787515	171953	84590.3	701712	292946	191357	338860	335843		199923	187672	441595	297125	8	7	7	8	0.0200931	0.350389	0.631238	0.429777
Q8CHU3	Epn2	Epsin-2	188	AGGSPASYHGSTSPR	monophos-(188)AGGSPASYHGSTSPR	39442.4																1	0	1	0	#DIV/0!	#DIV/0!	#DIV/0!	#DIV/0!
Q8CHU3	Epn2	Epsin-2	384	TTDAWGAAKPSSASGSFELFSNFNGTVKDDFSEFDNLR	diphos-(384)TTDAWGAAKPSSASGSFELFSNFNGTVKDDFSEFDNLR	262244								560418	385662			650402	204356			1	4	3	2	#DIV/0!	#DIV/0!	0.339824	0.909984
Q8CHU3	Epn2	Epsin-2	440	TTSPDLFESQSLTSASSKPSSAR	monophos-(440)TTSPDLFESQSLTSASSKPSSAR	940529	1.48936e+06	2.28416e+06	1.06007e+06	2.02723e+06	591617	1.38916e+06	657181	1.78652e+06	1.75489e+06	2.13213e+06	1.6082e+06	790613	817441	2.32132e+06	1.65909e+06	8	8	8	8	0.784435	0.315724	0.373704	0.244449
Q8CGC7	Eprs	Bifunctional glutamate/proline--tRNA ligase	56	YLARIATTSGLYGTNLMEHTEIDHWLEFSATK	diphos-(56)YLARIATTSGLYGTNLMEHTEIDHWLEFSATK					187082												1	0	0	1	#DIV/0!	#DIV/0!	#DIV/0!	#DIV/0!
Q60902	Eps15l1	Epidermal growth factor receptor substrate 15-like 1	216	TVFAGAVPVLPASPPPKDSLR	monophos-(216)TVFAGAVPVLPASPPPKDSLR		198435	1.0139e+06	1.71444e+06			872117	787371	260616	262673	423623	1.60706e+06			497104	2.08717e+06	5	6	7	4	0.491403	0.887336	0.816007	0.527375
Q60902	Eps15l1	Epidermal growth factor receptor substrate 15-like 1	344	GIDPPQVLSPDMVPPSER	monophos-(344)GIDPPQVLSPDMVPPSER	164615	233908		339617		168691	493615	265105	306692	205323	313026	487348			527776	229182	6	6	7	5	0.878993	0.387278	0.338832	0.582228
Q60902	Eps15l1	Epidermal growth factor receptor substrate 15-like 1	557	SLEQYDQVPDGVSGTSLPDLATLNEGILLAER	monophos-(557)SLEQYDQVPDGVSGTSLPDLATLNEGILLAER				75212.3												68250.2	1	1	1	1	#DIV/0!	#DIV/0!	#DIV/0!	#DIV/0!
Q99K30	Eps8l2	Epidermal growth factor receptor kinase substrate 8-like protein 2	708	RAEDSYTSQHTSPESEGAPHL	monophos-(708)RAEDSYTSQHTSPESEGAPHL											386745	233610					0	2	2	0	#DIV/0!	#DIV/0!	#DIV/0!	#DIV/0!
Q5EBJ4	Ermn	Ermin	208	EGSPLKEESLAR	monophos-(208)EGSPLKEESLAR	1.21858e+06	752159	1.9409e+06					3.27257e+06	2.76874e+06	2.84884e+06	5.25536e+06	2.41495e+06		744264		4.1262e+06	4	6	7	3	0.61408	0.20786	0.612368	0.814818
Q5EBJ4	Ermn	Ermin	220	EDSPLGSPGSQPGTPDEQPVFGK	diphos-(220)EDSPLGSPGSQPGTPDEQPVFGK	144931		427646					1.37679e+06	218761	135164	1.82278e+06	865278		326736		1.68325e+06	3	6	6	3	0.951844	0.717984	0.766222	0.30552
Q5EBJ4	Ermn	Ermin	220	EDSPLGSPGSQPGTPDEQPVFGK	monophos-(220)EDSPLGSPGSQPGTPDEQPVFGK	1.17021e+06		4.18617e+06					1.56324e+06	1.46309e+06	514974	2.55991e+06	948280		161490		461614	3	6	6	3	0.227205	0.157064	0.489977	0.247913
Q3V1V3	Esf1	ESF1 homolog	644	ALAEEDSEDELPSDVDFNDPYFAEEVKK	diphos-(644)ALAEEDSEDELPSDVDFNDPYFAEEVKK			753173					299495									2	0	1	1	#DIV/0!	#DIV/0!	#DIV/0!	#DIV/0!
Q3TZZ7	Esyt2	Extended synaptotagmin-2	674	EPTPSIASDISLPIATQELR	diphos-(674)EPTPSIASDISLPIATQELR		327146	735375					447456		523122			490073		561207		3	3	3	3	0.0559798	0.869717	0.146823	0.824614
Q91WM6	Eva1a	Protein eva-1 homolog A	113	NVFTSAEELER	monophos-(113)NVFTSAEELER	63288.8	510097	413147	820371	551850	105041	2.01653e+06	623570	126375		1.17823e+06	1.37126e+06	76541.7	158583	905686	728373	8	7	7	8	0.757646	0.970406	0.590349	0.985928
P70429	Evl	Ena/VASP-like protein	231	RVQRPEDASGGSSPSGTSK	monophos-(231)RVQRPEDASGGSSPSGTSK		29040.6							17728								1	1	2	0	#DIV/0!	#DIV/0!	#DIV/0!	#DIV/0!
P70429	Evl	Ena/VASP-like protein	232	VQRPEDASGGSSPSGTSK	monophos-(232)VQRPEDASGGSSPSGTSK		73552.4	81645.3						57172.2		112225						2	2	4	0	0.185839	0.82243	#DIV/0!	#DIV/0!
P70429	Evl	Ena/VASP-like protein	289	KEDESQTEDPSTSPSPGTR	monophos-(289)KEDESQTEDPSTSPSPGTR	622497	78770.5	836832							649217	476637					371931	3	3	5	1	0.227562	0.957974	#DIV/0!	#DIV/0!
P70429	Evl	Ena/VASP-like protein	326	SNSVEKPVSSLLSR	monophos-(326)SNSVEKPVSSLLSR	575244	1.75346e+06	3.04788e+06	229162	704917	692113	828540	658837	954150	1.00601e+06	1.79551e+06	975858	412077	953915	636888	1.59746e+06	8	8	8	8	0.0876147	0.957051	0.0272931	0.18633
P70429	Evl	Ena/VASP-like protein	361	VKPAGSVNDVGLDALDLDR	monophos-(361)VKPAGSVNDVGLDALDLDR	52314.8	153488	441178	181716	98178.5	72194	188400		92373.1		402188		84706.8	61998.9		380837	7	5	6	6	0.529353	0.69739	0.552315	0.402189
O35382	Exoc4	Exocyst complex component 4	468	SGELQGGPDDNLIEGGGTK	monophos-(468)SGELQGGPDDNLIEGGGTK											225444						0	1	1	0	#DIV/0!	#DIV/0!	#DIV/0!	#DIV/0!
A6H5Z3	Exoc6b	Exocyst complex component 6B	247	DVYTIFDAEVESTSPK	monophos-(247)DVYTIFDAEVESTSPK	99680.1	200950				101849				615507					285965		3	2	3	2	0.112936	0.0931511	0.63841	0.63988
Q6PGF7	Exoc8	Exocyst complex component 8	25	QLSQQSDGDRDLQEHR	monophos-(25)QLSQQSDGDRDLQEHR	105107																1	0	1	0	#DIV/0!	#DIV/0!	#DIV/0!	#DIV/0!
O88792	F11r	Junctional adhesion molecule A	278	VIYSQPSTRSEGEFK	diphos-(278)VIYSQPSTRSEGEFK	502020	580399						696145									3	0	2	1	#DIV/0!	#DIV/0!	#DIV/0!	#DIV/0!
O88792	F11r	Junctional adhesion molecule A	278	VIYSQPSTR	monophos-(278)VIYSQPSTR								166651							128083		1	1	0	2	#DIV/0!	#DIV/0!	#DIV/0!	#DIV/0!
Q9CQY2	Fam103a1	RNMT-activating mini protein	31	RPPESPPIVEEWNSR	monophos-(31)RPPESPPIVEEWNSR								71529.4							134054	171085	1	2	0	3	#DIV/0!	#DIV/0!	#DIV/0!	#DIV/0!
Q8C739	Fam110b	Protein FAM110B	294	ANSDIISLNFR	diphos-(294)ANSDIISLNFR			63476.8														1	0	1	0	#DIV/0!	#DIV/0!	#DIV/0!	#DIV/0!
Q8C739	Fam110b	Protein FAM110B	294	ANSDIISLNFR	monophos-(294)ANSDIISLNFR	35979.4	73406.6	221610		235975	40515.4		124716	52476.4	49440.7	173156					189730	6	4	6	4	0.844181	0.91701	0.793676	0.392591
Q8VE88	Fam114a2	Protein FAM114A2	110	AETSLGIPSPTEISAEVK	monophos-(110)AETSLGIPSPTEISAEVK		181545				117965											2	0	1	1	#DIV/0!	#DIV/0!	#DIV/0!	#DIV/0!
Q8VE88	Fam114a2	Protein FAM114A2	230	THYGLLFDEFQGLSHLEALEMLSRESEIK	diphos-(230)THYGLLFDEFQGLSHLEALEMLSRESEIK		105097															1	0	1	0	#DIV/0!	#DIV/0!	#DIV/0!	#DIV/0!
Q9DB52	Fam122a	Protein FAM122A	31	SNSAPLIHGLSDSSPVFQAEAPSAR	monophos-(31)SNSAPLIHGLSDSSPVFQAEAPSAR	45039.6	106573	947644		351435	160966			92298.8	62107.4	427255	167782	90569.2	60419.5	104182	231316	5	8	7	6	0.0148355	0.373521	0.0285454	0.481382
Q9DB52	Fam122a	Protein FAM122A	132	RIDFIPVSPAPSPTR	diphos-(132)RIDFIPVSPAPSPTR	82439.6	134977	245099		138702	73062.8	412236	453257	130253			572544	90987.3	100636	250139	412577	7	6	5	8	0.593707	0.692903	0.599749	0.935102
Q9DB52	Fam122a	Protein FAM122A	257	VSTTTDSPVSPAQAASPFIPVDELSSK	diphos-(257)VSTTTDSPVSPAQAASPFIPVDELSSK											307792						0	1	1	0	#DIV/0!	#DIV/0!	#DIV/0!	#DIV/0!
Q6P9N1	Fam126a	Hyccin	452	SFEQVSGAPVPR	monophos-(452)SFEQVSGAPVPR		94238.7	223431					257224									3	0	2	1	#DIV/0!	#DIV/0!	#DIV/0!	#DIV/0!
Q8C729	Fam126b	Protein FAM126B	283	NSLPFDAPDSSQEGQK	monophos-(283)NSLPFDAPDSSQEGQK	553190	544880	555606		415809	337259			925143	395341	1.00072e+06		646475	583587		313480	5	6	6	5	0.0709034	0.245204	0.368464	0.137171
Q8C729	Fam126b	Protein FAM126B	314	TAITTASIRR	monophos-(314)TAITTASIRR						317324									768575		1	1	0	2	#DIV/0!	#DIV/0!	#DIV/0!	#DIV/0!
Q8C729	Fam126b	Protein FAM126B	328	REGAEGLNGGEESLNMNDADEGFSSGASLSSQPHGTKPPSSSQR	diphos-(328)REGAEGLNGGEESLNMNDADEGFSSGASLSSQPHGTKPPSSSQR										222716							0	1	1	0	#DIV/0!	#DIV/0!	#DIV/0!	#DIV/0!
Q8C729	Fam126b	Protein FAM126B	427	HLSLPAGQVVPK	monophos-(427)HLSLPAGQVVPK	293075	429329	402605		194168	209443	1.2155e+06	591760	376751	397949	420146	655363	185930	144813	680367	785310	7	8	7	8	0.297146	0.894083	0.00752854	0.608117
Q8C729	Fam126b	Protein FAM126B	518	SPSFNMQLISQV	monophos-(518)SPSFNMQLISQV		184892	416196		307132	385368	1.22212e+06	626849				395236		293008	1.06286e+06	780353	6	4	3	7	0.995012	0.656184	0.219581	0.175839
Q8BWU3	Fam131a	Protein FAM131A	63	SPRPSSVDSQDLPEVNVGDTVAMLPK	diphos-(63)SPRPSSVDSQDLPEVNVGDTVAMLPK					163058												1	0	0	1	#DIV/0!	#DIV/0!	#DIV/0!	#DIV/0!
Q3TY60	Fam131b	Protein FAM131B	45	NSNAYGIGALAK	monophos-(45)NSNAYGIGALAK	122086	136097	174178				243568	289688	221509	346333	220754		87082.9	81040.4			5	5	6	4	0.421808	0.976635	0.550225	0.647585
Q3TY60	Fam131b	Protein FAM131B	108	DTDAYSDLSDGEKEAR	diphos-(108)DTDAYSDLSDGEKEAR		529251	609876	153137			342217	1.15792e+06			774753	322037		294598			5	3	5	3	0.726906	0.720946	0.225299	0.648383
Q3TY60	Fam131b	Protein FAM131B	108	DTDAYSDLSDGEKEAR	monophos-(108)DTDAYSDLSDGEKEAR	769767	1.22604e+06	1.56333e+06	862920	1.01238e+06	404669	1.25387e+06	418567	1.58683e+06	606980	1.53571e+06	1.38371e+06	241808	225844	422791	3.06154e+06	8	8	8	8	0.0367688	0.612921	0.0315806	0.415077
Q3TY60	Fam131b	Protein FAM131B	277	RPLAPEEEEDAGCRDLESLSPR	monophos-(277)RPLAPEEEEDAGCRDLESLSPR	599223	347513					646643		1.03634e+06								3	1	3	1	#DIV/0!	#DIV/0!	#DIV/0!	#DIV/0!
Q3TY60	Fam131b	Protein FAM131B	291	DLESLSPR	diphos-(291)DLESLSPR																184994	0	1	0	1	#DIV/0!	#DIV/0!	#DIV/0!	#DIV/0!
Q3TY60	Fam131b	Protein FAM131B	291	DLESLSPREDPEMSTALSR	monophos-(291)DLESLSPREDPEMSTALSR	442748	392144	374633	301413		72453.5	668778	482096	583681	374008	663545				535428	652726	7	5	7	5	0.416986	0.0957491	0.166799	0.751784
Q3TY60	Fam131b	Protein FAM131B	310	KVSDVTSSGVQSFDEEEGDANN	diphos-(310)KVSDVTSSGVQSFDEEEGDANN					162773									97169.2			1	1	0	2	#DIV/0!	#DIV/0!	#DIV/0!	#DIV/0!
Q3TY60	Fam131b	Protein FAM131B	310	KVSDVTSSGVQSFDEEEGDANN	monophos-(310)KVSDVTSSGVQSFDEEEGDANN	1.50739e+06	2.13935e+06	2.65823e+06	471297	1.94547e+06	722059	1.1643e+06	1.08988e+06	2.27166e+06	674034	3.15577e+06	952113	790132	1.06843e+06	2.32333e+06	1.54325e+06	8	8	8	8	0.638586	0.747713	0.168657	0.336119
Q3TY60	Fam131b	Protein FAM131B	311	VSDVTSSGVQSFDEEEGDANN	monophos-(311)VSDVTSSGVQSFDEEEGDANN		125384	304951		441200	96654.5		169507	274463	148073	338926		71957.8	123751		204427	5	6	5	6	0.441071	0.65461	0.530598	0.474376
Q6NS82	Fam134a	Protein FAM134A	118	FLPDVSAPPPEEPHSDSEGAGSGAQPHLLSVPELCR	diphos-(118)FLPDVSAPPPEEPHSDSEGAGSGAQPHLLSVPELCR			506130														1	0	1	0	#DIV/0!	#DIV/0!	#DIV/0!	#DIV/0!
Q6NS82	Fam134a	Protein FAM134A	261	SAPPAGDEPLAETESESEAELAGFSPVVDVK	diphos-(261)SAPPAGDEPLAETESESEAELAGFSPVVDVK	635822		1.37934e+06		676146		720895				1.16949e+06						4	1	3	2	#DIV/0!	#DIV/0!	0.11654	0.294132
Q6NS82	Fam134a	Protein FAM134A	293	TALALAITDSELSDEEASILESGGFSVSR	diphos-(293)TALALAITDSELSDEEASILESGGFSVSR							59691.4	132347								78292.3	2	1	0	3	#DIV/0!	#DIV/0!	#DIV/0!	#DIV/0!
Q6NS82	Fam134a	Protein FAM134A	322	ATTPQLTDVSEDLDQQSLPSEPEEALNR	diphos-(322)ATTPQLTDVSEDLDQQSLPSEPEEALNR			847483	461374	169153		486087	440070	285954					327274	447857	392457	5	4	3	6	0.0732436	0.384077	0.0891344	0.269108
Q6NS82	Fam134a	Protein FAM134A	322	ATTPQLTDVSEDLDQQSLPSEPEEALNR	monophos-(322)ATTPQLTDVSEDLDQQSLPSEPEEALNR	104511		245477	170600			171114	154697	263905	181233	170386				203278	195833	5	5	6	4	0.540293	0.261552	0.149863	0.798547
Q9CQV4	Fam134c	Protein FAM134C	252	ATDSHSDSEEELAAFCPQLDDSTVAR	diphos-(252)ATDSHSDSEEELAAFCPQLDDSTVAR			447063										164654	118202			1	2	1	2	#DIV/0!	#DIV/0!	#DIV/0!	#DIV/0!
Q9CQV4	Fam134c	Protein FAM134C	304	GQTPLTEGSEDLDGHSDPEESFAR	diphos-(304)GQTPLTEGSEDLDGHSDPEESFAR	340139	273650	2.44182e+06		1.00205e+06			316787	918664	503719			855639	298610			5	4	5	4	0.0891794	0.650088	0.168333	0.584226
Q9CQV4	Fam134c	Protein FAM134C	304	GQTPLTEGSEDLDGHSDPEESFAR	monophos-(304)GQTPLTEGSEDLDGHSDPEESFAR	427961				134376				491171	423789			335542				2	3	3	2	0.234087	0.353624	0.127573	0.0766044
Q9CQV4	Fam134c	Protein FAM134C	432	APSSDLDTDAEGDDFELLDQSELNQLDPASSR	diphos-(432)APSSDLDTDAEGDDFELLDQSELNQLDPASSR			525498					196294									2	0	1	1	#DIV/0!	#DIV/0!	#DIV/0!	#DIV/0!
Q9CQV4	Fam134c	Protein FAM134C	432	APSSDLDTDAEGDDFELLDQSELNQLDPASSR	monophos-(432)APSSDLDTDAEGDDFELLDQSELNQLDPASSR		60271.5	328882		253226			124434	98479.6				108663				4	2	3	3	0.0869517	0.389046	0.458969	0.996571
Q9DBR2	Fam13c	Protein FAM13C	395	SEAVGPEPGSSGEETSDAVVPEKR	diphos-(395)SEAVGPEPGSSGEETSDAVVPEKR							1.05854e+06	1.13967e+06									2	0	0	2	#DIV/0!	#DIV/0!	#DIV/0!	#DIV/0!
Q3U2I3	Fam160a2	FTS and Hook-interacting protein	507	QQSLGGSESPGPVPR	monophos-(507)QQSLGGSESPGPVPR	355576	421788	451155	198443			1.71698e+06	264957	343793	390405	594037	1.06975e+06			363060	469963	6	6	8	4	0.136555	0.911064	0.0368786	0.562423
Q3U2I3	Fam160a2	FTS and Hook-interacting protein	522	SPGLTASPTSSPSR	diphos-(522)SPGLTASPTSSPSR						150371											1	0	0	1	#DIV/0!	#DIV/0!	#DIV/0!	#DIV/0!
Q3U2I3	Fam160a2	FTS and Hook-interacting protein	889	DGTGLGLGGGSPGASTPVLLPR	monophos-(889)DGTGLGLGGGSPGASTPVLLPR	122226	268130	623171	451383		195373	387832	757198	127706	217923	188821				699684	415444	7	5	7	5	0.925949	0.611979	0.587256	0.119715
Q8BUM6	Fam163b	Protein FAM163B	92	SCSHYEPPTFFLQEPEDEDFEGVR	monophos-(92)SCSHYEPPTFFLQEPEDEDFEGVR			121329		356013		203602				342746						3	1	2	2	#DIV/0!	#DIV/0!	0.767586	0.756255
Q5XG69	Fam169a	Soluble lamin-associated protein of 75 kDa	338	HFQDSEFSSSQGEDENVAK	monophos-(338)HFQDSEFSSSQGEDENVAK	603702	268878	1.07373e+06		1.62467e+06			470842	1.03657e+06		273773		88939.9	307003	664469		5	5	5	5	0.495551	0.291616	0.442791	0.951137
Q5XG69	Fam169a	Soluble lamin-associated protein of 75 kDa	372	TSESSEEFLEEEPEQGVIDFEDESGDKDAQPALETQPR	diphos-(372)TSESSEEFLEEEPEQGVIDFEDESGDKDAQPALETQPR			1.21511e+06	153698				304029					81801.1	54708.6		333771	3	3	2	4	0.133968	0.307802	0.0283319	0.523269
Q5XG69	Fam169a	Soluble lamin-associated protein of 75 kDa	485	TSPDTDSEMLIDQSPSDDKGHTEENLSPVSK	monophos-(485)TSPDTDSEMLIDQSPSDDKGHTEENLSPVSK	483096	189970	1.81626e+06	396919		144802		410363	918139	552957	129262	535843	460596	244961	182934	765323	6	8	8	6	0.0587723	0.692054	0.0813563	0.292956
Q5XG69	Fam169a	Soluble lamin-associated protein of 75 kDa	603	SQSEEQSEASSEHLEQFTQSAEK	diphos-(603)SQSEEQSEASSEHLEQFTQSAEK			833450														1	0	1	0	#DIV/0!	#DIV/0!	#DIV/0!	#DIV/0!
Q5XG69	Fam169a	Soluble lamin-associated protein of 75 kDa	603	SQSEEQSEASSEHLEQFTQSAEK	monophos-(603)SQSEEQSEASSEHLEQFTQSAEK									355429								0	1	1	0	#DIV/0!	#DIV/0!	#DIV/0!	#DIV/0!
Q5XG69	Fam169a	Soluble lamin-associated protein of 75 kDa	626	AVDSSSEEIEVEVPVVDRR	diphos-(626)AVDSSSEEIEVEVPVVDRR	249013	414643	5.82245e+06	4.52518e+06	3.12307e+06	568290	4.42486e+06	3.98319e+06	662530	319100	3.37658e+06	4.43373e+06	1.11072e+06	2.00834e+06	2.52648e+06	2.67933e+06	8	8	8	8	0.267061	0.428002	0.164794	0.935294
A2A699	Fam171a2	Protein FAM171A2	364	DQATSMSQLHLICGGPLEPTSSGDPEAPPPGSLHSAFSSSRDLASSR	diphos-(364)DQATSMSQLHLICGGPLEPTSSGDPEAPPPGSLHSAFSSSRDLASSR													269164				0	1	0	1	#DIV/0!	#DIV/0!	#DIV/0!	#DIV/0!
A2A699	Fam171a2	Protein FAM171A2	444	SVEGPGGLEPSLDEYRR	monophos-(444)SVEGPGGLEPSLDEYRR	241668	221160		1.43412e+06		499989	1.21013e+06	381492	222844	284620	488616		213618	320389	1.31496e+06		6	6	6	6	0.652704	0.504204	0.991976	0.541425
A2A699	Fam171a2	Protein FAM171A2	734	TGLCSPEDNSLTPLLDEVVAPEGR	diphos-(734)TGLCSPEDNSLTPLLDEVVAPEGR								127095									1	0	0	1	#DIV/0!	#DIV/0!	#DIV/0!	#DIV/0!
A2A699	Fam171a2	Protein FAM171A2	734	TGLCSPEDNSLTPLLDEVVAPEGR	monophos-(734)TGLCSPEDNSLTPLLDEVVAPEGR	282694	537640		969550		618139	603916	362734	1.24522e+06	961137	1.54389e+06		972936	409755	1.55156e+06		6	6	6	6	0.224734	0.0210768	0.954566	0.529515
Q14CH0	Fam171b	Protein FAM171B	781	STVEDFEANTSPTK	monophos-(781)STVEDFEANTSPTK					1.04173e+06												1	0	0	1	#DIV/0!	#DIV/0!	#DIV/0!	#DIV/0!
Q8BR63	Fam177a1	Protein FAM177A1	51	VIHFVSGETMEEYSTDEDEVDGLDKK	diphos-(51)VIHFVSGETMEEYSTDEDEVDGLDKK			1.15621e+06	7.14922e+06	955453			6.65743e+06			8.43603e+06	1.07896e+07		370323		1.47093e+07	4	4	4	4	0.364962	0.233076	0.447852	0.76755
Q3UGS4	Fam195b	Protein FAM195B	20	SPTNSSEIFTPAHEENVR	monophos-(20)SPTNSSEIFTPAHEENVR		193792	523664				322468	593839			239398					342924	4	2	3	3	0.566454	0.453181	0.833651	0.497205
Q6PGL7	Fam21	WASH complex subunit FAM21	153	AGNSDSEEDDANERVDLILEPK	diphos-(153)AGNSDSEEDDANERVDLILEPK	298446	602871	2.81065e+06	1.26072e+06			999864	830278	733706		1.77002e+06		851025	962464	322396	745814	6	6	6	6	0.204152	0.578082	0.010973	0.285994
Q6PGL7	Fam21	WASH complex subunit FAM21	529	GLFSDEEDSEDLFSSQSSSKPK	monophos-(529)GLFSDEEDSEDLFSSQSSSKPK	367500	499463	1.1464e+06	1.44953e+06		302633	1.28349e+06	725942	569737	491840	993578	1.11756e+06	493911	546474	872886	1.07309e+06	7	8	8	7	0.184661	0.780357	0.748531	0.713283
Q6PGL7	Fam21	WASH complex subunit FAM21	606	TSALLFSSDEEDQWNIADSHTK	diphos-(606)TSALLFSSDEEDQWNIADSHTK		100015	2.26126e+06	1.18769e+06		526783	1.49651e+06	1.27621e+06		323370	1.19685e+06	1.36909e+06		1.00079e+06	1.35531e+06	1.24863e+06	6	6	6	6	0.179978	0.868775	0.0991186	0.827954
Q6PGL7	Fam21	WASH complex subunit FAM21	606	TSALLFSSDEEDQWNIADSHTK	monophos-(606)TSALLFSSDEEDQWNIADSHTK	116845					155920		1.28808e+06		327835			117883				3	2	2	3	0.311755	0.595195	0.313403	0.594061
Q6PGL7	Fam21	WASH complex subunit FAM21	717	VPLLFSDEEDSEVPSGVKPEDLK	monophos-(717)VPLLFSDEEDSEVPSGVKPEDLK	354730		1.38161e+06	1.17419e+06		297595	2.26664e+06	902298	623812	422410	805621	1.17218e+06	404759	382721	934134	2.18225e+06	6	8	7	7	0.615608	0.590365	0.0970388	0.570637
Q6PGL7	Fam21	WASH complex subunit FAM21	740	VDNARVSPEVGSADVASIAQK	monophos-(740)VDNARVSPEVGSADVASIAQK	985349					67836.6									1.32105e+06		2	1	1	2	#DIV/0!	#DIV/0!	#DIV/0!	#DIV/0!
Q6PGL7	Fam21	WASH complex subunit FAM21	761	EGLLPASDQEAGGPSDIFSSSSPLDK	monophos-(761)EGLLPASDQEAGGPSDIFSSSSPLDK	65643.4								94836.5								1	1	2	0	#DIV/0!	#DIV/0!	#DIV/0!	#DIV/0!
Q6PGL7	Fam21	WASH complex subunit FAM21	1319	VASIFDDPLNAFGSQ	monophos-(1319)VASIFDDPLNAFGSQ				87899.1		49279.3	104734	68362.8			55343.5			35763.1		82518.5	4	3	2	5	0.954487	0.328093	0.888713	0.880561
Q7TSF4	Fam211a	Leucine-rich repeat-containing protein FAM211A	311	EGTDQQDPIGSPVTPARGQESTECVIQT	diphos-(311)EGTDQQDPIGSPVTPARGQESTECVIQT		315870	580499					278045		205583	346144			130748		266889	3	4	4	3	0.355126	0.170172	0.440393	0.234972
Q7TSF4	Fam211a	Leucine-rich repeat-containing protein FAM211A	311	EGTDQQDPIGSPVTPAR	monophos-(311)EGTDQQDPIGSPVTPAR	305511	378199	641780		172022	103205	605538	332150	545020	547250	644980	300240		146092	221549	460473	7	7	7	7	0.865253	0.662071	0.627994	0.0576064
Q80VY2	Fam212b	Protein FAM212B	272	HIETPATSSPK	monophos-(272)HIETPATSSPK	120481		224804			86445.4											3	0	2	1	#DIV/0!	#DIV/0!	#DIV/0!	#DIV/0!
Q9D772	Fam219a	Protein FAM219A	38	NGSMGSPVNQQPK	monophos-(38)NGSMGSPVNQQPK											113123						0	1	1	0	#DIV/0!	#DIV/0!	#DIV/0!	#DIV/0!
Q9D772	Fam219a	Protein FAM219A	66	GYSSLDQSPDEKPLVALDTDSDDDFDMSR	diphos-(66)GYSSLDQSPDEKPLVALDTDSDDDFDMSR			355964	431736				635278			954053	1.62758e+06		53619		880947	3	4	4	3	0.0963297	0.344451	0.723664	0.46491
Q9D772	Fam219a	Protein FAM219A	66	GYSSLDQSPDEKPLVALDTDSDDDFDMSR	monophos-(66)GYSSLDQSPDEKPLVALDTDSDDDFDMSR				420714				232126			678882	858633				375286	2	3	3	2	0.720158	0.209133	0.618475	0.136254
Q8BHZ0	Fam49a	Protein FAM49A	166	INNMHLDIENEVNNEMANRMSLFYAEATPMLK	diphos-(166)INNMHLDIENEVNNEMANRMSLFYAEATPMLK						53074											1	0	0	1	#DIV/0!	#DIV/0!	#DIV/0!	#DIV/0!
Q76LS9	Fam63a	Protein FAM63A	87	VETAEVCSRPQELPQSPR	monophos-(87)VETAEVCSRPQELPQSPR									240689					88580.1			0	2	1	1	#DIV/0!	#DIV/0!	#DIV/0!	#DIV/0!
Q6PDI6	Fam63b	Protein FAM63B	95	VTASPELAEAAAGR	monophos-(95)VTASPELAEAAAGR						387123											1	0	0	1	#DIV/0!	#DIV/0!	#DIV/0!	#DIV/0!
Q68FE6	Fam65a	Protein FAM65A	340	FSTYSQSPPDTPSLR	monophos-(340)FSTYSQSPPDTPSLR	162124	242669	351480		387209			298864	242940	246848	321501	370981				306498	5	5	7	3	0.350916	0.847145	0.671468	0.287325
Q68FE6	Fam65a	Protein FAM65A	839	ASSLSITVEHALESFSFLNDDEDEDNDGPGDR	monophos-(839)ASSLSITVEHALESFSFLNDDEDEDNDGPGDR			88031.1														1	0	1	0	#DIV/0!	#DIV/0!	#DIV/0!	#DIV/0!
Q68FE6	Fam65a	Protein FAM65A	871	HTSSPEVVAEDR	monophos-(871)HTSSPEVVAEDR	140452	650229						224641	279846	404138						444325	3	3	4	2	0.179263	0.831004	0.950532	0.855221
Q8BK03	Fam73b	Protein FAM73B	266	TLMLPLTEGSLR	monophos-(266)TLMLPLTEGSLR	51562.4		125445			107339	330753	326664		62926.2				48269.3	243161	434753	5	4	3	6	0.536324	0.933848	0.139828	0.100029
Q80XP8	Fam76b	Protein FAM76B	188	VSSLSPEQEQGLWK	monophos-(188)VSSLSPEQEQGLWK								317964									1	0	0	1	#DIV/0!	#DIV/0!	#DIV/0!	#DIV/0!
Q9D650	Fam84a	Protein FAM84A	56	GPPGCSPCPESPSR	monophos-(56)GPPGCSPCPESPSR		87855.3															1	0	1	0	#DIV/0!	#DIV/0!	#DIV/0!	#DIV/0!
F8VPU2	Farp1	FERM, RhoGEF and pleckstrin domain-containing protein 1	13	LGAPENSGISTLER	monophos-(13)LGAPENSGISTLER	116393	214918							227397	272897				67186.3			2	3	4	1	0.829657	0.807789	#DIV/0!	#DIV/0!
F8VPU2	Farp1	FERM, RhoGEF and pleckstrin domain-containing protein 1	387	QSPQSASLTFGEGTESPGGQSCQQAK	monophos-(387)QSPQSASLTFGEGTESPGGQSCQQAK			324695						282452	339063							1	2	3	0	#DIV/0!	#DIV/0!	#DIV/0!	#DIV/0!
F8VPU2	Farp1	FERM, RhoGEF and pleckstrin domain-containing protein 1	416	ACTLELGPHQSPALPKSPPGSK	diphos-(416)ACTLELGPHQSPALPKSPPGSK	593118	1.26674e+06	2.47949e+06	410347	1.48796e+06	970747			1.46584e+06	1.37493e+06	719057		1.0931e+06	1.16966e+06			6	5	7	4	0.0928155	0.91971	0.0842642	0.985874
F8VPU2	Farp1	FERM, RhoGEF and pleckstrin domain-containing protein 1	416	ACTLELGPHQSPALPK	monophos-(416)ACTLELGPHQSPALPK	142388	386418	416741						229113	329976	405826		147326				3	4	6	1	0.623491	0.722662	#DIV/0!	#DIV/0!
Q2PZL6	Fat4	Protocadherin Fat 4	2096	FSIGTIDGEVHLTGELDREEVSNYSLTVVATDK	diphos-(2096)FSIGTIDGEVHLTGELDREEVSNYSLTVVATDK				284490			6.49333e+06					3.66549e+06			1.9593e+06		2	2	2	2	0.341458	0.874381	0.815814	0.509453
Q3UMF9	Faxc	Failed axon connections homolog	381	TPDTDFTGHSLFDSDVEMDDYTDHEQCK	monophos-(381)TPDTDFTGHSLFDSDVEMDDYTDHEQCK			384346								380046	138730				171729	1	3	3	1	#DIV/0!	#DIV/0!	#DIV/0!	#DIV/0!
Q9CZV8	Fbxl20	F-box/LRR-repeat protein 20	408	VHAYFAPVTPPPSVGGSR	diphos-(408)VHAYFAPVTPPPSVGGSR	527807	753260	1.74637e+06	2.02594e+06	1.49531e+06	800467	3.64557e+06	3.06173e+06	657495	523700	2.45988e+06	2.74197e+06	871570	885265	2.1608e+06	4.59014e+06	8	8	8	8	0.568957	0.872174	0.26101	0.229187
Q80UW2	Fbxo2	F-box only protein 2	95	CQQEGLVPEGSADEERDHWQQFYFLSK	monophos-(95)CQQEGLVPEGSADEERDHWQQFYFLSK					82160.3						257637						1	1	1	1	#DIV/0!	#DIV/0!	#DIV/0!	#DIV/0!
Q80UW2	Fbxo2	F-box only protein 2	129	NPCGEEDLEGWSDVEHGGDGWR	monophos-(129)NPCGEEDLEGWSDVEHGGDGWR	165347	320603	1.03776e+06	364859	471428	246025		543831		150154	1.16705e+06	518094	213307			645312	7	5	7	5	0.431973	0.666235	0.15263	0.599019
Q8CHQ0	Fbxo4	F-box only protein 4	7	GAGSPPPASDWGR	monophos-(7)GAGSPPPASDWGR																527396	0	1	0	1	#DIV/0!	#DIV/0!	#DIV/0!	#DIV/0!
P62932	Fbxo40	F-box only protein 40	393	SDLIKTTLQCALER	diphos-(393)SDLIKTTLQCALER	2.08044e+06	5.32561e+06		8.39357e+06	8.67282e+06	3.87917e+06	7.54808e+06	1.25451e+07	3.99944e+06	4.91024e+06	1.28541e+07		2.14423e+06	2.49271e+06	9.41842e+06	1.30086e+07	7	7	6	8	0.476385	0.980702	0.837906	0.596217
Q6NS60	Fbxo41	F-box only protein 41	473	RHSTEGEEGDVSDVGSR	diphos-(473)RHSTEGEEGDVSDVGSR			214994				268088				234231						2	1	2	1	#DIV/0!	#DIV/0!	#DIV/0!	#DIV/0!
Q6NS60	Fbxo41	F-box only protein 41	473	RHSTEGEEGDVSDVGSR	monophos-(473)RHSTEGEEGDVSDVGSR	166528	797929	1.11012e+06	237255	87356			207097	968236	1.29479e+06	616715		435620		199815	382246	6	6	7	5	0.967216	0.388598	0.0527833	0.038379
Q8K0X8	Fez1	Fasciculation and elongation protein zeta-1	57	SMEDLVNEFDEK	monophos-(57)SMEDLVNEFDEK	169876	164184	317669		212351	195382	473434	513656	125342	184988	389538	313182			519173		7	5	7	5	0.831935	0.877012	0.270516	0.085712
P52734	Fgd1	FYVE, RhoGEF and PH domain-containing protein 1	361	QESVELTVQQK	monophos-(361)QESVELTVQQK					77730.5												1	0	0	1	#DIV/0!	#DIV/0!	#DIV/0!	#DIV/0!
Q61851	Fgfr3	Fibroblast growth factor receptor 3	433	IARLSSGEGPVLANVSELELPADPK	diphos-(433)IARLSSGEGPVLANVSELELPADPK			740959	313030		221335		512958	143001		404435	992257	426653	236069	278306	364250	4	7	5	6	0.822672	0.810374	0.0347057	0.318093
Q9D824	Fip1l1	Pre-mRNA 3'-end-processing factor FIP1	476	DHSPTPSVFNSDEER	diphos-(476)DHSPTPSVFNSDEER			237680								188048						1	1	2	0	#DIV/0!	#DIV/0!	#DIV/0!	#DIV/0!
Q9D824	Fip1l1	Pre-mRNA 3'-end-processing factor FIP1	476	DHSPTPSVFNSDEER	monophos-(476)DHSPTPSVFNSDEER			405732								248313						1	1	2	0	#DIV/0!	#DIV/0!	#DIV/0!	#DIV/0!
Q9CQ92	Fis1	Mitochondrial fission 1 protein	19	KFQSEQAAGSVSK	monophos-(19)KFQSEQAAGSVSK			87772.5								311505						1	1	2	0	#DIV/0!	#DIV/0!	#DIV/0!	#DIV/0!
Q9WTJ4	Fiz1	Flt3-interacting zinc finger protein 1	383	ASHGEGSGEAAPDGEGNQAAGGPGPGSSSRSK	diphos-(383)ASHGEGSGEAAPDGEGNQAAGGPGPGSSSRSK														36846.3			0	1	0	1	#DIV/0!	#DIV/0!	#DIV/0!	#DIV/0!
Q2VIS4	Flg2	Filaggrin-2	1118	SQPVHPESSEGEEHSVVPQRHSGSGHGHGQGQGQAGHQQR	monophos-(1118)SQPVHPESSEGEEHSVVPQRHSGSGHGHGQGQGQAGHQQR	243082																1	0	1	0	#DIV/0!	#DIV/0!	#DIV/0!	#DIV/0!
Q8CI03	Flywch1	FLYWCH-type zinc finger-containing protein 1	39	ERPKPTDVASQETSSTATLPNNTLQVAPVK	diphos-(39)ERPKPTDVASQETSSTATLPNNTLQVAPVK			444070														1	0	1	0	#DIV/0!	#DIV/0!	#DIV/0!	#DIV/0!
Q9JL04	Fmn2	Formin-2	337	GSPGEEWVPEVEEASQR	monophos-(337)GSPGEEWVPEVEEASQR	468055	549872	1.30899e+06	1.05841e+06		637384	1.09164e+06	562990	944061	742160	1.18791e+06	908373	193837	640528	1.57351e+06	1.20966e+06	7	8	8	7	0.597947	0.573062	0.254881	0.798981
Q9JL04	Fmn2	Formin-2	364	ESITSAVVSLPGSPAPSPR	diphos-(364)ESITSAVVSLPGSPAPSPR		174153						260325						147635	225346		2	2	1	3	0.93432	0.649085	#DIV/0!	#DIV/0!
Q9JL04	Fmn2	Formin-2	458	SADWTEELGVR	monophos-(458)SADWTEELGVR	62558.3	105025		249335		86050		190124			96947				239755		5	2	4	3	0.53443	0.68778	0.987802	0.513238
Q9JL04	Fmn2	Formin-2	482	GATADDSGGGSPVLAAK	monophos-(482)GATADDSGGGSPVLAAK	158476					162244			312217	522556				107222	424299		2	4	3	3	0.021967	0.134984	0.924344	0.525999
Q9JL04	Fmn2	Formin-2	719	SIQTSPTEEGR	monophos-(719)SIQTSPTEEGR	278595	401866	480163	589755		145270			382812	470075	473340	532044		221383	724656		5	6	8	3	0.906319	0.411649	0.0145507	0.680581
Q9JL26	Fmnl1	Formin-like protein 1	177	SKPLDQSVEDLSK	monophos-(177)SKPLDQSVEDLSK		382995		255495		165245		228447		616553			115568	144767			4	3	3	4	0.10143	0.824082	0.0566538	0.0405942
Q9JL26	Fmnl1	Formin-like protein 1	492	GPGDVVSIEILPGAAATPSGDDAQAPR	monophos-(492)GPGDVVSIEILPGAAATPSGDDAQAPR	129763	161189	348142	253738		79900.9	351931	179404	245324	311644	251794		180653	127874	197258	327848	7	7	7	7	0.359693	0.690263	0.544726	0.45566
Q80TY0	Fnbp1	Formin-binding protein 1	293	TVSDNSLSSSK	diphos-(293)TVSDNSLSSSK							1.01606e+06					766637					1	1	1	1	#DIV/0!	#DIV/0!	#DIV/0!	#DIV/0!
Q8K012	Fnbp1l	Formin-binding protein 1-like	292	TISDGTISAAK	monophos-(292)TISDGTISAAK	557722	736987	3.05453e+06		790878	206389	1.36085e+06	1.40279e+06	452419	490037	1.79912e+06	683582			779578		7	5	7	5	0.325017	0.516169	0.208099	0.68091
Q8K012	Fnbp1l	Formin-binding protein 1-like	486	HSSDINHLVTQGRESPEGSYTDDANQEVR	monophos-(486)HSSDINHLVTQGRESPEGSYTDDANQEVR		1.65653e+06	2.82033e+06		306871		483418	577580	1.3114e+06	1.8362e+06	352948		154307			399423	5	5	5	5	0.478316	0.551567	0.00611853	0.0373657
Q68FD7	Fnip1	Folliculin-interacting protein 1	750	VTFLIGDSMSPDSDTELR	diphos-(750)VTFLIGDSMSPDSDTELR								120629									1	0	0	1	#DIV/0!	#DIV/0!	#DIV/0!	#DIV/0!
Q8BUR3	Foxj3	Forkhead box protein J3	210	VTLYNADQDGSDSPR	monophos-(210)VTLYNADQDGSDSPR					492226												1	0	0	1	#DIV/0!	#DIV/0!	#DIV/0!	#DIV/0!
P42128	Foxk1	Forkhead box protein K1	401	SAPASPTHPGLMSPR	diphos-(401)SAPASPTHPGLMSPR	464278					291483		481057							393179	408324	3	2	1	4	0.143949	0.892517	#DIV/0!	#DIV/0!
Q8BIE6	Frmd4a	FERM domain-containing protein 4A	773	AAGALGSASSGSMPNLAAR	monophos-(773)AAGALGSASSGSMPNLAAR			348670														1	0	1	0	#DIV/0!	#DIV/0!	#DIV/0!	#DIV/0!
Q7TPM6	Fsd1	Fibronectin type III and SPRY domain-containing protein 1	483	RGSATSSSNTSLT	monophos-(483)RGSATSSSNTSLT			457753	430840	135154	80018.9				155213	945923			231256			4	3	4	3	0.224136	0.515559	0.103695	0.13857
Q8BGW1	Fto	Alpha-ketoglutarate-dependent dioxygenase FTO	236	SAVAVYSYSCEGSEDESEDESSFEGR	monophos-(236)SAVAVYSYSCEGSEDESEDESSFEGR										115938							0	1	1	0	#DIV/0!	#DIV/0!	#DIV/0!	#DIV/0!
P70213	Fv1	Friend virus susceptibility protein 1	243	SLSDLTSQK	monophos-(243)SLSDLTSQK	107155		207921		115242			314680	121220				73305.3				4	2	3	3	0.499796	0.29693	0.303724	0.796259
Q9WVR4	Fxr2	Fragile X mental retardation syndrome-related protein 2	598	TDGSISGDRQPVTVADYISR	diphos-(598)TDGSISGDRQPVTVADYISR	309812	1.09123e+06	2.72772e+06	1.59565e+06	1.27921e+06	334142	2.29557e+06	1.28757e+06	565264	1.51113e+06	1.16655e+06	2.2495e+06	793116	801530	882785	1.09847e+06	8	8	8	8	0.24628	0.524344	0.389121	0.398172
Q9Z239	Fxyd1	Phospholemman	69	TGEPDEEEGTFRSSIR	diphos-(69)TGEPDEEEGTFRSSIR			226567								355902						1	1	2	0	#DIV/0!	#DIV/0!	#DIV/0!	#DIV/0!
Q9Z239	Fxyd1	Phospholemman	69	TGEPDEEEGTFRSSIR	monophos-(69)TGEPDEEEGTFRSSIR	415490	3.07646e+06	3.00042e+06	1.94374e+06	3.24147e+06		5.5098e+06	1.14331e+07			1.30954e+07	4.39056e+06	1.51697e+06	803977	1.44713e+07	7.78e+06	7	6	6	7	0.27038	0.290408	0.788756	0.459048
P59648	Fxyd7	FXYD domain-containing ion transport regulator 7	64	SCKSELPSSAPGGGGV	diphos-(64)SCKSELPSSAPGGGGV			868028		161650						231818	394925					2	2	3	1	0.288935	0.634225	#DIV/0!	#DIV/0!
P59648	Fxyd7	FXYD domain-containing ion transport regulator 7	64	SCKSELPSSAPGGGGV	monophos-(64)SCKSELPSSAPGGGGV	220859		609689		389303	145330	1.8938e+06	145714			1.56971e+06			385447		1.25645e+06	6	3	3	6	0.976868	0.314766	0.895941	0.851255
P59648	Fxyd7	FXYD domain-containing ion transport regulator 7	67	SELPSSAPGGGGV	monophos-(67)SELPSSAPGGGGV	242972	311932	324461		352509	87963.2	1.46355e+06	1.1172e+06	677045		620040		128404	124973		1.54743e+06	7	5	5	7	0.762228	0.848752	0.0353792	0.369311
P39688	Fyn	Tyrosine-protein kinase Fyn	18	DGSLNQSSGYR	monophos-(18)DGSLNQSSGYR		318090							303699			442104					1	2	3	0	#DIV/0!	#DIV/0!	#DIV/0!	#DIV/0!
P39688	Fyn	Tyrosine-protein kinase Fyn	299	TLKPGTMSPESFLEEAQIMK	diphos-(299)TLKPGTMSPESFLEEAQIMK										120338							0	1	1	0	#DIV/0!	#DIV/0!	#DIV/0!	#DIV/0!
P39688	Fyn	Tyrosine-protein kinase Fyn	413	LIEDNEYTAR	monophos-(413)LIEDNEYTAR	250505	201402		271506	142481	77159.3			259114	142685		213926	64789.5		352803	545216	5	6	6	5	0.16842	0.393208	0.00641336	0.894803
P97855	G3bp1	Ras GTPase-activating protein-binding protein 1	132	YQDEVFGGFVTEPQEESEEEVEEPEER	monophos-(132)YQDEVFGGFVTEPQEESEEEVEEPEER	561235	498072	1.93451e+06	823187	566150	330828	1.89457e+06	1.16189e+06	995855	971700	1.01603e+06	1.10683e+06	339013	406178	910636	1.27225e+06	8	8	8	8	0.107559	0.71521	0.54985	0.617874
P97855	G3bp1	Ras GTPase-activating protein-binding protein 1	228	STSPAPADVAPAQEDLR	monophos-(228)STSPAPADVAPAQEDLR	3.64272e+06	4.22969e+06	1.07597e+07		77560.4	3.05694e+06	9.24621e+06	2.12199e+06	5.72008e+06	3.31717e+06	1.18007e+07			902160	2.47238e+06	499683	7	6	6	7	0.828178	0.788501	0.660088	0.0618515
P97855	G3bp1	Ras GTPase-activating protein-binding protein 1	255	NLPPSGAVPVTGTPPHVVKVPASQPRPESKPDSQIPPQRPQR	monophos-(255)NLPPSGAVPVTGTPPHVVKVPASQPRPESKPDSQIPPQRPQR			15534.9														1	0	1	0	#DIV/0!	#DIV/0!	#DIV/0!	#DIV/0!
P97379	G3bp2	Ras GTPase-activating protein-binding protein 2	132	YEDEVFGDSEPELDEESEDEVEEEQEDR	diphos-(132)YEDEVFGDSEPELDEESEDEVEEEQEDR											365985						0	1	1	0	#DIV/0!	#DIV/0!	#DIV/0!	#DIV/0!
P97379	G3bp2	Ras GTPase-activating protein-binding protein 2	216	HLEELEEKSATPPPAEPASLPQEPPK	diphos-(216)HLEELEEKSATPPPAEPASLPQEPPK		228872															1	0	1	0	#DIV/0!	#DIV/0!	#DIV/0!	#DIV/0!
P97379	G3bp2	Ras GTPase-activating protein-binding protein 2	224	SATPPPAEPASLPQEPPK	monophos-(224)SATPPPAEPASLPQEPPK	5.0849e+06	6.26069e+06	3.3357e+06	3.1353e+06	1.86846e+06	2.12058e+06	6.91664e+06	3.53914e+06	8.58071e+06	4.29711e+06	4.64713e+06	4.04418e+06	1.43961e+06	2.04534e+06	3.5243e+06	5.75198e+06	8	8	8	8	0.654358	0.804326	0.77926	0.128538
Q80T41	Gabbr2	Gamma-aminobutyric acid type B receptor subunit 2	771	TSTSVTSVNQASTSR	diphos-(771)TSTSVTSVNQASTSR					187700					338715			109298	84922.1			1	3	1	3	#DIV/0!	#DIV/0!	#DIV/0!	#DIV/0!
Q80T41	Gabbr2	Gamma-aminobutyric acid type B receptor subunit 2	800	ITELDKDLEEVTMQLQDTPEK	monophos-(800)ITELDKDLEEVTMQLQDTPEK	105223	306018	735495				353717		435989	681811	265678		145841	109474		371818	4	6	6	4	0.621654	0.796238	0.360404	0.233639
Q80T41	Gabbr2	Gamma-aminobutyric acid type B receptor subunit 2	872	TCKDPIEDINSPEHIQR	monophos-(872)TCKDPIEDINSPEHIQR	1.35749e+06	1.22306e+06			1.30199e+06				898524	1.87042e+06	562869		593045	210011			3	5	5	3	0.0226395	0.174419	0.750141	0.247374
P48318	Gad1	Glutamate decarboxylase 1	69	QSSKNLLSCENSDQGAR	monophos-(69)QSSKNLLSCENSDQGAR	235218	476385	1.53846e+06		417299				228036								4	1	4	1	#DIV/0!	#DIV/0!	#DIV/0!	#DIV/0!
P48318	Gad1	Glutamate decarboxylase 1	73	NLLSCENSDQGAR	monophos-(73)NLLSCENSDQGAR	207497	206244	721179		498928	279390			260478		471802			281469			5	3	5	3	0.447883	0.763847	0.513853	0.892553
Q99KY4	Gak	Cyclin-G-associated kinase	811	ESQSVLIADGDGSEVSDEEEASFPSEER	diphos-(811)ESQSVLIADGDGSEVSDEEEASFPSEER			1.21058e+06														1	0	1	0	#DIV/0!	#DIV/0!	#DIV/0!	#DIV/0!
P06837	Gap43	Neuromodulin	37	IQASFR	monophos-(37)IQASFR	5.60938e+06	6.01337e+06	7.70766e+06	5.90648e+06	2.31739e+06	2.95534e+06	1.02048e+07	9.09924e+06	6.96385e+06	4.2089e+06	1.41098e+07	8.57027e+06	1.10834e+06	2.97159e+06	6.56595e+06	1.26641e+07	8	8	8	8	0.209316	0.631553	0.383283	0.462202
P06837	Gap43	Neuromodulin	80	KEGDGSATTDAAPATSPK	monophos-(80)KEGDGSATTDAAPATSPK	158339	312133	1.25264e+06	254465	259267	172479	175975	1.01064e+06	184861	57468.6	770880	994925		140441	559792	1.39243e+06	8	7	8	7	0.698236	0.578664	0.79293	0.897111
P06837	Gap43	Neuromodulin	81	EGDGSATTDAAPATSPKAEEPSK	diphos-(81)EGDGSATTDAAPATSPKAEEPSK			612015								471226					1.19583e+06	1	2	2	1	#DIV/0!	#DIV/0!	#DIV/0!	#DIV/0!
P06837	Gap43	Neuromodulin	81	EGDGSATTDAAPATSPKAEEPSK	monophos-(81)EGDGSATTDAAPATSPKAEEPSK	1.92904e+07	2.48146e+07	6.16842e+07	7.46225e+06	1.96317e+07	4.24368e+06	2.6037e+07	6.67722e+07	3.26806e+07	1.09502e+07	5.48889e+07	3.09838e+07	2.56528e+06	1.32797e+07	1.47233e+07	9.58928e+07	8	8	8	8	0.483391	0.814285	0.179385	0.997189
P06837	Gap43	Neuromodulin	114	GEGDAAPSEEKAGSAETESAAK	monophos-(114)GEGDAAPSEEKAGSAETESAAK															1.12497e+06		0	1	0	1	#DIV/0!	#DIV/0!	#DIV/0!	#DIV/0!
P06837	Gap43	Neuromodulin	125	AGSAETESAAKATTDNSPSSK	diphos-(125)AGSAETESAAKATTDNSPSSK	9142.67										68651.7			10940.3		122494	1	3	2	2	#DIV/0!	#DIV/0!	0.623956	0.702877
P06837	Gap43	Neuromodulin	157	QADVPAAVTDAAATTPAAEDAATK	monophos-(157)QADVPAAVTDAAATTPAAEDAATK	1.97378e+06	2.84998e+06	5.86367e+06	1.52647e+06	1.73398e+06	716016	3.7996e+06	3.95803e+06	5.05387e+06	1.08931e+06	9.74633e+06	2.86605e+06	1.10157e+06	1.07461e+06	2.02134e+06	4.66071e+06	8	8	8	8	0.145916	0.600807	0.113304	0.219792
P06837	Gap43	Neuromodulin	181	AAQPPTETAESSQAEEEKDAVDEAKPK	diphos-(181)AAQPPTETAESSQAEEEKDAVDEAKPK			259897														1	0	1	0	#DIV/0!	#DIV/0!	#DIV/0!	#DIV/0!
P06837	Gap43	Neuromodulin	181	AAQPPTETAESSQAEEEKDAVDEAKPK	monophos-(181)AAQPPTETAESSQAEEEKDAVDEAKPK	154853	405456	366169				431088		265687	172979	448615	135219			140573		4	5	7	2	0.981305	0.257652	0.324833	0.950118
P16858	Gapdh	Glyceraldehyde-3-phosphate dehydrogenase	198	GAAQNIIPASTGAAK	monophos-(198)GAAQNIIPASTGAAK	202207	189988	402456	334161	296336					247998			158942			563625	5	3	5	3	0.13802	0.725061	0.157226	0.552908
Q6PAR5	Gapvd1	GTPase-activating protein and VPS9 domain-containing protein 1	451	SSSLDMTPYSTPQMSPATTPANKK	monophos-(451)SSSLDMTPYSTPQMSPATTPANKK			336145											88586.8			1	1	1	1	#DIV/0!	#DIV/0!	#DIV/0!	#DIV/0!
Q6PAR5	Gapvd1	GTPase-activating protein and VPS9 domain-containing protein 1	561	TLRFSLCSDNLEGISEGPSNR	diphos-(561)TLRFSLCSDNLEGISEGPSNR														146583			0	1	0	1	#DIV/0!	#DIV/0!	#DIV/0!	#DIV/0!
Q6PAR5	Gapvd1	GTPase-activating protein and VPS9 domain-containing protein 1	754	EVSSRPSTPGLSVVSGISATSEDIPNKIEDLR	diphos-(754)EVSSRPSTPGLSVVSGISATSEDIPNKIEDLR			1.01908e+06		511982	534959		509267			393870	236432	242338	115833		336843	4	5	3	6	0.131927	0.017532	0.10061	0.382382
Q6PAR5	Gapvd1	GTPase-activating protein and VPS9 domain-containing protein 1	899	SRSSDIVSSVR	monophos-(899)SRSSDIVSSVR			252011		407809		575868						247717	183054			3	2	1	4	0.39151	0.208702	#DIV/0!	#DIV/0!
Q6PAR5	Gapvd1	GTPase-activating protein and VPS9 domain-containing protein 1	901	SSDIVSSVR	monophos-(901)SSDIVSSVR					83551									65772			1	1	0	2	#DIV/0!	#DIV/0!	#DIV/0!	#DIV/0!
Q60780	Gas7	Growth arrest-specific protein 7	95	KSTGDSQNLGSSSPGR	monophos-(95)KSTGDSQNLGSSSPGR											2.07805e+06			416825			0	2	1	1	#DIV/0!	#DIV/0!	#DIV/0!	#DIV/0!
Q60780	Gas7	Growth arrest-specific protein 7	96	STGDSQNLGSSSPGR	monophos-(96)STGDSQNLGSSSPGR	218566	450416	365046	188421		163186	322206		171631	80043.7	464376	121496		131517	289697	304675	6	7	8	5	0.698676	0.400906	0.327224	0.840961
Q8VHR5	Gatad2b	Transcriptional repressor p66-beta	117	GRLTPSPDIIVLSDNEASSPR	diphos-(117)GRLTPSPDIIVLSDNEASSPR														180041			0	1	0	1	#DIV/0!	#DIV/0!	#DIV/0!	#DIV/0!
Q69ZF3	Gba2	Non-lysosomal glucosylceramidase	890	RPSVTQGTGLSTQPECGPK	monophos-(890)RPSVTQGTGLSTQPECGPK			768765														1	0	1	0	#DIV/0!	#DIV/0!	#DIV/0!	#DIV/0!
Q9Z0E6	Gbp2	Interferon-induced guanylate-binding protein 2	421	LGTFSKPGGYYLFLQMR	diphos-(421)LGTFSKPGGYYLFLQMR									2.44748e+06								0	1	1	0	#DIV/0!	#DIV/0!	#DIV/0!	#DIV/0!
Q8BKT3	Gcfc2	GC-rich sequence DNA-binding factor 2	115	DVSPIVEIPDAAFIQAAR	monophos-(115)DVSPIVEIPDAAFIQAAR								149267									1	0	0	1	#DIV/0!	#DIV/0!	#DIV/0!	#DIV/0!
O09172	Gclm	Glutamate--cysteine ligase regulatory subunit	49	TLNEWSSQISPDLVR	monophos-(49)TLNEWSSQISPDLVR		861657	545045	260523	200116		459176	1.54961e+06	454601		834893	314377	144382	35832.4	1.15918e+06		6	6	6	6	0.745245	0.57686	0.0743338	0.869284
P47856	Gfpt1	Glutamine--fructose-6-phosphate aminotransferase [isomerizing] 1	256	VDSTTCLFPVEEK	monophos-(256)VDSTTCLFPVEEK	194819	210342	596507		237017		639018	234146	377435	388415	830717		247335	220076			6	5	6	5	0.705286	0.665659	0.586412	0.396374
Q8BMI3	Gga3	ADP-ribosylation factor-binding protein GGA3	154	TLIPSPPPRPK	monophos-(154)TLIPSPPPRPK									759045								0	1	1	0	#DIV/0!	#DIV/0!	#DIV/0!	#DIV/0!
Q8BMI3	Gga3	ADP-ribosylation factor-binding protein GGA3	264	LASETEDNDNSLGDILQASDNLSR	monophos-(264)LASETEDNDNSLGDILQASDNLSR									206241								0	1	1	0	#DIV/0!	#DIV/0!	#DIV/0!	#DIV/0!
Q9D7X8	Ggct	Gamma-glutamylcyclotransferase	169	GKISDEMEDIIK	monophos-(169)GKISDEMEDIIK			299856		327072		428070										3	0	1	2	#DIV/0!	#DIV/0!	#DIV/0!	#DIV/0!
Q99JP7	Ggt7	Gamma-glutamyltransferase 7	69	LPSSSSEMGSQDGSPLR	monophos-(69)LPSSSSEMGSQDGSPLR	158593					79948.5			368966					109437			2	2	2	2	0.37463	0.469735	0.17732	0.252395
Q99MR1	Gigyf1	PERQ amino acid-rich with GYF domain-containing protein 1	136	SIEEGDGAFGR	monophos-(136)SIEEGDGAFGR	373695	434599		1.25127e+06	382775	229208		973693	423004					177921	768751		6	3	4	5	0.766258	0.590298	0.704543	0.669093
Q6Y7W8	Gigyf2	PERQ amino acid-rich with GYF domain-containing protein 2	362	AGAEASEEVPQTSLSSARPGTPSDHQPQEATQFER	monophos-(362)AGAEASEEVPQTSLSSARPGTPSDHQPQEATQFER			253647						165793								1	1	2	0	#DIV/0!	#DIV/0!	#DIV/0!	#DIV/0!
Q68FF6	Git1	ARF GTPase-activating protein GIT1	367	SLSSPTDNLELSAR	diphos-(367)SLSSPTDNLELSAR					580276		772564	247525			345048						3	1	1	3	#DIV/0!	#DIV/0!	#DIV/0!	#DIV/0!
Q68FF6	Git1	ARF GTPase-activating protein GIT1	367	SLSSPTDNLELSAR	monophos-(367)SLSSPTDNLELSAR	4.78798e+06	4.91026e+06	1.52111e+07	8.28643e+06	7.82277e+06	6.97707e+06	9.37752e+06	6.31396e+06	1.43926e+07	6.91598e+06	1.55966e+07	1.49087e+07	2.86124e+06	6.48918e+06	1.65755e+07	9.60821e+06	8	8	8	8	0.277924	0.192988	0.610902	0.301815
Q68FF6	Git1	ARF GTPase-activating protein GIT1	381	SQSELDDQHDYDSVASDEDTDQEPLPSAGATR	diphos-(381)SQSELDDQHDYDSVASDEDTDQEPLPSAGATR	22425.1	4.78078e+06	2.40157e+07	8.24392e+06	150660		7.77719e+06	5.29719e+06	332277	14668473	1.4218e+07	5.65954e+06	284244	627684	5.0628e+06	3.40539e+06	7	8	8	7	0.420079	0.656025	0.0249902	0.0965991
Q68FF6	Git1	ARF GTPase-activating protein GIT1	381	SQSELDDQHDYDSVASDEDTDQEPLPSAGATR	monophos-(381)SQSELDDQHDYDSVASDEDTDQEPLPSAGATR	1.17933e+06	988608	1.98156e+06	1.07668e+06	1.26142e+06	186965	1.42296e+06	384911	5.84276e+06	1.8802e+06	2.21161e+06	1.14971e+06	134730	143613	878554	1.95253e+06	8	8	8	8	0.00638182	0.320505	0.040951	0.0737639
Q68FF6	Git1	ARF GTPase-activating protein GIT1	418	SMDSSDLSDGAVTLQEYLELKK	monophos-(418)SMDSSDLSDGAVTLQEYLELKK			773960	133352	1.29148e+06	262196		131474			179470	233315				119748	5	3	4	4	0.0249142	0.207827	0.324537	0.717133
Q68FF6	Git1	ARF GTPase-activating protein GIT1	598	HGSGADSDYENTQSGDPLLGLEGK	diphos-(598)HGSGADSDYENTQSGDPLLGLEGK	328821	737095	2.14948e+06	945780	1.34207e+06	1.26136e+06	1.00621e+06	1.72925e+06	662678		2.4571e+06	734549	359827		1.76778e+06	818820	8	6	7	7	0.396163	0.885063	0.261538	0.917063
Q68FF6	Git1	ARF GTPase-activating protein GIT1	598	HGSGADSDYENTQSGDPLLGLEGKR	monophos-(598)HGSGADSDYENTQSGDPLLGLEGKR	5.22438e+06	6.39943e+06	6.11268e+06	4.47694e+06	5.96943e+06	6.65695e+06	1.49901e+07	2.04179e+06	2.28681e+06	2.73604e+06	6.54815e+06	3.93723e+06	3.43002e+06	3.76447e+06	6.62275e+06	7.23291e+06	8	8	8	8	0.102116	0.219684	0.0336023	0.310596
P23242	Gja1	Gap junction alpha-1 protein	303	QASEQNWANYSAEQNR	monophos-(303)QASEQNWANYSAEQNR	216118	577475	894529			100734			401366	454938	300127			180946		425462	4	5	6	3	0.0470557	0.64365	0.725159	0.173841
P23242	Gja1	Gap junction alpha-1 protein	319	MGQAGSTISNSHAQPFDFPDDSQNAK	diphos-(319)MGQAGSTISNSHAQPFDFPDDSQNAK	781076	618230	5.60728e+06		1.29864e+06	419733	1.45741e+06	1.34376e+06	400536	389550	1.72747e+06		268357	3.02479e+06		651293	7	6	6	7	0.298603	0.512995	0.0841336	0.665819
P23242	Gja1	Gap junction alpha-1 protein	319	MGQAGSTISNSHAQPFDFPDDSQNAK	monophos-(319)MGQAGSTISNSHAQPFDFPDDSQNAK			680653							223257							1	1	2	0	#DIV/0!	#DIV/0!	#DIV/0!	#DIV/0!
P23242	Gja1	Gap junction alpha-1 protein	346	VAAGHELQPLAIVDQRPSSR	monophos-(346)VAAGHELQPLAIVDQRPSSR								2.14032e+06								664291	1	1	0	2	#DIV/0!	#DIV/0!	#DIV/0!	#DIV/0!
P23242	Gja1	Gap junction alpha-1 protein	370	ASSRPRPDDLEI	monophos-(370)ASSRPRPDDLEI													624520				0	1	0	1	#DIV/0!	#DIV/0!	#DIV/0!	#DIV/0!
Q8K3I9	Glcci1	Glucocorticoid-induced transcript 1 protein	211	SASWGSADQLK	monophos-(211)SASWGSADQLK	211726	227638	269472			91334.7	462286		261484	257141	522673			95036.4	242022	383073	5	6	6	5	0.913184	0.640558	0.435212	0.674979
P26443	Glud1	Glutamate dehydrogenase 1, mitochondrial	124	DDGSWEVIEGYR	monophos-(124)DDGSWEVIEGYR			163594														1	0	1	0	#DIV/0!	#DIV/0!	#DIV/0!	#DIV/0!
P15105	Glul	Glutamine synthetase	14	QMYMSLPQGEK	monophos-(14)QMYMSLPQGEK	94011	107495	190387		107792	64894.3		184486			298698			60286.9			6	2	4	4	0.0425975	0.72644	0.439368	0.262295
P15105	Glul	Glutamine synthetase	103	YNRKPAETNLR	monophos-(103)YNRKPAETNLR					24383.7				13663		72757.7		18061.8				1	3	2	2	#DIV/0!	#DIV/0!	0.135695	0.536412
P15105	Glul	Glutamine synthetase	340	RPSANCDPYAVTEAIVR	monophos-(340)RPSANCDPYAVTEAIVR	567297	878422	1.33681e+06	394727	435866	428338	312010	498924	900298	395009	1.37029e+06	338163	251806	226264	522305	854267	8	8	8	8	0.67862	0.99684	0.0706952	0.0622915
Q8C0V7	Gm4776	Sperm motility kinase W	386	SASMPPIALHYPEK	monophos-(386)SASMPPIALHYPEK											869418						0	1	1	0	#DIV/0!	#DIV/0!	#DIV/0!	#DIV/0!
A2AJA9	Gm996	Uncharacterized protein C9orf172 homolog	573	QRSLEQLDELITDLVIDSR	monophos-(573)QRSLEQLDELITDLVIDSR			39097.9														1	0	1	0	#DIV/0!	#DIV/0!	#DIV/0!	#DIV/0!
Q9CQI3	Gmfb	Glia maturation factor beta	41	LVVLDEELEGVSPDELKDELPER	monophos-(41)LVVLDEELEGVSPDELKDELPER		69141.5	186772	232209			430490	371527	163119		482701	385991	357935	59326.1	287541	491833	5	7	6	6	0.877661	0.520623	0.975399	0.384561
Q3THK7	Gmps	GMP synthase [glutamine-hydrolyzing]	325	TLNMTTSPEEK	monophos-(325)TLNMTTSPEEK	856722	999645	1.51091e+06		548643	206500	2.34537e+06	1.54572e+06	1.69889e+06	1.43583e+06	1.98879e+06	1.28699e+06	112490	198171	1.55108e+06	2.27239e+06	7	8	7	8	0.845408	0.663605	0.047729	0.431594
Q8CGK7	Gnal	Guanine nucleotide-binding protein G(olf) subunit alpha	168	IDSVSLVDYTPTDQDLLR	monophos-(168)IDSVSLVDYTPTDQDLLR								127863									1	0	0	1	#DIV/0!	#DIV/0!	#DIV/0!	#DIV/0!
Q8CGK7	Gnal	Guanine nucleotide-binding protein G(olf) subunit alpha	188	VLTSGIFETR	monophos-(188)VLTSGIFETR								95895.9									1	0	0	1	#DIV/0!	#DIV/0!	#DIV/0!	#DIV/0!
P18872	Gnao1	Guanine nucleotide-binding protein G(o) subunit alpha	21	NLKEDGISAAK	monophos-(21)NLKEDGISAAK		91617.9															1	0	1	0	#DIV/0!	#DIV/0!	#DIV/0!	#DIV/0!
P18872	Gnao1	Guanine nucleotide-binding protein G(o) subunit alpha	154	YYLDSLDR	monophos-(154)YYLDSLDR			171004							72443.5						148454	1	2	2	1	#DIV/0!	#DIV/0!	#DIV/0!	#DIV/0!
P18872	Gnao1	Guanine nucleotide-binding protein G(o) subunit alpha	198	LFDVGGQRSER	monophos-(198)LFDVGGQRSER																652684	0	1	0	1	#DIV/0!	#DIV/0!	#DIV/0!	#DIV/0!
P62874	Gnb1	Guanine nucleotide-binding protein G(I)/G(S)/G(T) subunit beta-1	219	QTFTGHESDINAICFFPNGNAFATGSDDATCR	diphos-(219)QTFTGHESDINAICFFPNGNAFATGSDDATCR				603293								960449					1	1	2	0	#DIV/0!	#DIV/0!	#DIV/0!	#DIV/0!
P63216	Gng3	Guanine nucleotide-binding protein G(I)/G(S)/G(O) subunit gamma-3	0	MKGETPVNSTMSIGQAR	diphos-(0)MKGETPVNSTMSIGQAR		106763	1.12387e+06				185145				2.13191e+06			232366	110883		3	3	3	3	0.399161	0.654471	0.00728914	0.247185
P63216	Gng3	Guanine nucleotide-binding protein G(I)/G(S)/G(O) subunit gamma-3	0	MKGETPVNSTMSIGQAR	monophos-(0)MKGETPVNSTMSIGQAR	418943	1.83988e+06	3.19625e+06		136578	711037	794986	797627	667615		6.42302e+06	284858	60217.4	807454	2.01369e+06	1.11698e+06	7	7	6	8	0.0947831	0.60087	0.00238034	0.231525
P36916	Gnl1	Guanine nucleotide-binding protein-like 1	43	REEQTDTSDGESVTHHIR	diphos-(43)REEQTDTSDGESVTHHIR	315391	365783	1.9555e+06		217638		846176	964219			4.2208e+06						6	1	4	3	#DIV/0!	#DIV/0!	0.0918621	0.38994
P36916	Gnl1	Guanine nucleotide-binding protein-like 1	43	REEQTDTSDGESVTHHIR	monophos-(43)REEQTDTSDGESVTHHIR	1.44256e+06	1.60675e+06	4.59381e+06		2.73851e+06		566676	1.41378e+06	7.53735e+06		8.18218e+06	166818	820894			4.37673e+06	6	5	6	5	0.0598162	0.217206	0.1649	0.271713
P36916	Gnl1	Guanine nucleotide-binding protein-like 1	313	DVAGASWGNVSGEEEEEEDGPAVLVEQLTDSAMEPTGPSR	monophos-(313)DVAGASWGNVSGEEEEEEDGPAVLVEQLTDSAMEPTGPSR	442102	357007					785514	630900					128030	148315		596027	4	3	2	5	0.5876	0.184651	0.297956	0.806976
P36916	Gnl1	Guanine nucleotide-binding protein-like 1	572	DADEEGEGDEDTPTSDPGSCLTAR	diphos-(572)DADEEGEGDEDTPTSDPGSCLTAR											236768						0	1	1	0	#DIV/0!	#DIV/0!	#DIV/0!	#DIV/0!
Q9QYE6	Golga5	Golgin subfamily A member 5	28	ENTSNIFYSKNTDYPELQQQNTDSNYQTGQK	diphos-(28)ENTSNIFYSKNTDYPELQQQNTDSNYQTGQK								345048									1	0	0	1	#DIV/0!	#DIV/0!	#DIV/0!	#DIV/0!
Q9D428	GOLGA7B	Golgin subfamily A member 7B	25	DYSDGTICQFQTK	monophos-(25)DYSDGTICQFQTK																133607	0	1	0	1	#DIV/0!	#DIV/0!	#DIV/0!	#DIV/0!
Q99JX3	Gorasp2	Golgi reassembly-stacking protein 2	406	ADASSLTVDVTSPASK	monophos-(406)ADASSLTVDVTSPASK	206526	264000			220837	135351	485967			171822	452348					281197	5	3	4	4	0.81832	0.706333	0.7779	0.943731
P05202	Got2	Aspartate aminotransferase, mitochondrial	325	IAATILTSPDLR	monophos-(325)IAATILTSPDLR		36039.9	86059.5				230911	129358		32916.7	149732	180137			165409	231103	4	5	5	4	0.788759	0.566332	0.680463	0.0560014
Q69ZC8	Gpalpp1	GPALPP motifs-containing protein 1	127	GREDPGQVSSFFNSEEAESGEDEDIVGPMPAK	monophos-(127)GREDPGQVSSFFNSEEAESGEDEDIVGPMPAK	61864.3		1.8266e+06								1.11437e+06						2	1	3	0	#DIV/0!	#DIV/0!	#DIV/0!	#DIV/0!
Q8BUV3	Gphn	Gephyrin	175	VKEVHDELEDLPSPPPPLSPPPTTSPHK	diphos-(175)VKEVHDELEDLPSPPPPLSPPPTTSPHK	8.05583e+06	7.69975e+06	1.72633e+07	1.87664e+07	9.01112e+06	6.89767e+06	6.90008e+06	2.14931e+07	1.43937e+07	9.15365e+06	1.20521e+07	1.43134e+07	8.65269e+06	4.11973e+06	3.1047e+06	7.074e+07	8	8	8	8	0.0029924	0.549877	0.000226405	0.666916
Q8BUV3	Gphn	Gephyrin	175	VKEVHDELEDLPSPPPPLSPPPTTSPHK	monophos-(175)VKEVHDELEDLPSPPPPLSPPPTTSPHK																921044	0	1	0	1	#DIV/0!	#DIV/0!	#DIV/0!	#DIV/0!
Q8BUV3	Gphn	Gephyrin	258	DTASLSTTPSESPR	diphos-(258)DTASLSTTPSESPR	408520		938589	810631	190544	302421	1.47782e+06	1.04355e+06			752073			391870	2.22785e+06		7	3	4	6	0.132089	0.401733	0.0632212	0.627747
Q8BUV3	Gphn	Gephyrin	258	DTASLSTTPSESPR	monophos-(258)DTASLSTTPSESPR			1.50951e+06	1.28507e+06	2.24939e+06	500719		1.92967e+06		2.73356e+06	2.58906e+06	1.54309e+06			2.56061e+06		5	4	5	4	0.772736	0.0769894	0.567461	0.823347
Q8BUV3	Gphn	Gephyrin	278	LSTASCPTPK	diphos-(278)LSTASCPTPK	216477	214176	473792	600690			696949	433839			970091	307257		176253	424248	502445	6	5	6	5	0.372306	0.813251	0.411095	0.913067
Q8BUV3	Gphn	Gephyrin	278	LSTASCPTPK	monophos-(278)LSTASCPTPK	61132.5																1	0	1	0	#DIV/0!	#DIV/0!	#DIV/0!	#DIV/0!
Q8BUV3	Gphn	Gephyrin	325	CSSKENILR	monophos-(325)CSSKENILR											1.2404e+06						0	1	1	0	#DIV/0!	#DIV/0!	#DIV/0!	#DIV/0!
P35802	Gpm6a	Neuronal membrane glycoprotein M6-a	255	SKEEQELHDIHSTR	monophos-(255)SKEEQELHDIHSTR	1.67933e+07	2.62747e+07	3.82704e+07	2.02209e+07	4.39219e+07	1.42037e+07	6.66505e+07	8.75189e+07	4.38288e+07	2.72191e+07	5.67436e+07	4.96441e+07	1.93083e+07	3.23262e+06	4.85699e+07	8.02915e+07	8	8	8	8	0.827771	0.883255	0.0582156	0.400507
P35802	Gpm6a	Neuronal membrane glycoprotein M6-a	257	EEQELHDIHSTRSK	diphos-(257)EEQELHDIHSTRSK		1.05866e+06				177891	314854		468880	447665			296516	271316	768403	3.7055e+06	3	6	3	6	0.229635	0.58028	0.121091	0.76094
P35803	Gpm6b	Neuronal membrane glycoprotein M6-b	306	AKEEQELQDIQSR	monophos-(306)AKEEQELQDIQSR	1.9738e+06	5.16496e+06	7.78323e+06	2.45955e+06	4.09204e+06	798242	3.82163e+06	2.27624e+06	3.77837e+06	7.88079e+06	4.80396e+06	1.2873e+06	3.70315e+06	1.3491e+06	2.41424e+06	2.64818e+06	8	8	8	8	0.959117	0.954557	0.06693	0.0955592
P35803	Gpm6b	Neuronal membrane glycoprotein M6-b	319	SKEQLNSYT	monophos-(319)SKEQLNSYT	4.631e+06	1.07443e+07	1.85894e+07	3.83645e+06	1.82478e+06	1.60385e+06	7.73307e+06	3.25485e+06	9.29068e+06	1.89906e+07	1.34894e+07	5.67358e+06	6.09076e+06	2.54299e+06	3.04001e+06	7.74828e+06	8	8	8	8	0.920187	0.527718	0.0400573	0.0198667
Q8VCE2	Gpn1	GPN-loop GTPase 1	310	GNASPVLDPSDLILTR	monophos-(310)GNASPVLDPSDLILTR		77255.5	317964		191141				55428.9	76779.1	129789		80957.5	75206.5			3	5	5	3	0.0181248	0.246776	0.572435	0.830105
Q8VCE2	Gpn1	GPN-loop GTPase 1	326	GTLDEEDEEADSDTDDIDHR	monophos-(326)GTLDEEDEEADSDTDDIDHR			1.44697e+06								1.06823e+06						1	1	2	0	#DIV/0!	#DIV/0!	#DIV/0!	#DIV/0!
Q8C419	Gpr158	Probable G-protein coupled receptor 158	810	VFSLKK	monophos-(810)VFSLKK										389714							0	1	1	0	#DIV/0!	#DIV/0!	#DIV/0!	#DIV/0!
Q8C419	Gpr158	Probable G-protein coupled receptor 158	860	LKEDSEAESTESVPLVCK	diphos-(860)LKEDSEAESTESVPLVCK		858156	1.32983e+06		110119		300688			398345			215600	340624			4	3	3	4	0.055651	0.361921	0.0348481	0.143009
Q8C419	Gpr158	Probable G-protein coupled receptor 158	878	SASAHNLSSEKKPGHPR	monophos-(878)SASAHNLSSEKKPGHPR													66070.7				0	1	0	1	#DIV/0!	#DIV/0!	#DIV/0!	#DIV/0!
Q8C419	Gpr158	Probable G-protein coupled receptor 158	901	SLSVIASAK	monophos-(901)SLSVIASAK	299974	357501	512514		91398.8		279967		220792	801654			275163	104670			5	4	5	4	0.202854	0.79409	0.223495	0.0848146
Q8C419	Gpr158	Probable G-protein coupled receptor 158	941	KYSNSDNVETIPNSGHMEEPR	monophos-(941)KYSNSDNVETIPNSGHMEEPR													79378.5				0	1	0	1	#DIV/0!	#DIV/0!	#DIV/0!	#DIV/0!
Q8C419	Gpr158	Probable G-protein coupled receptor 158	1058	SIDKTEVCPWEIHSQSLLEDENR	monophos-(1058)SIDKTEVCPWEIHSQSLLEDENR		409165	689675					103312					444279				3	1	2	2	#DIV/0!	#DIV/0!	0.876528	0.338176
Q3UN16	Gpr162	Probable G-protein coupled receptor 162	536	RLSLGSPDSR	diphos-(536)RLSLGSPDSR					233795								249305				1	1	0	2	#DIV/0!	#DIV/0!	#DIV/0!	#DIV/0!
Q3UN16	Gpr162	Probable G-protein coupled receptor 162	536	RLSLGSPDSR	monophos-(536)RLSLGSPDSR					72128.3								129085				1	1	0	2	#DIV/0!	#DIV/0!	#DIV/0!	#DIV/0!
Q3UNH4	Gprin1	G protein-regulated inducer of neurite outgrowth 1	16	HALDQSLGMDPRHTSSSGAAEGASCSERPAGSLACPSPNCSPLPETPR	monophos-(16)HALDQSLGMDPRHTSSSGAAEGASCSERPAGSLACPSPNCSPLPETPR								128429					95785.1				1	1	0	2	#DIV/0!	#DIV/0!	#DIV/0!	#DIV/0!
Q3UNH4	Gprin1	G protein-regulated inducer of neurite outgrowth 1	177	VDIVSPGGDNAGSLR	monophos-(177)VDIVSPGGDNAGSLR			270746			356115											2	0	1	1	#DIV/0!	#DIV/0!	#DIV/0!	#DIV/0!
Q3UNH4	Gprin1	G protein-regulated inducer of neurite outgrowth 1	213	RERPGSTGEGDLVSLR	monophos-(213)RERPGSTGEGDLVSLR	412478	777905	1.17545e+06		113568	440271	1.0771e+06	718544			1.51251e+06				686839		7	2	4	5	0.349597	0.241023	0.578254	0.232492
Q3UNH4	Gprin1	G protein-regulated inducer of neurite outgrowth 1	363	NSELVSPVKPER	monophos-(363)NSELVSPVKPER	212989	568800	798274	346972	398527	378155	367100	335611	212948		892930	297645	250053	305853	540548	1.07029e+06	8	7	7	8	0.114613	0.553199	0.850408	0.888622
Q3UNH4	Gprin1	G protein-regulated inducer of neurite outgrowth 1	490	AETVSPGEVDAMTLGK	monophos-(490)AETVSPGEVDAMTLGK								670025				1.14023e+06			1.04114e+06	1.49154e+06	1	3	1	3	#DIV/0!	#DIV/0!	#DIV/0!	#DIV/0!
Q3UNH4	Gprin1	G protein-regulated inducer of neurite outgrowth 1	566	VITQIPGATSPGKVETPSLQK	monophos-(566)VITQIPGATSPGKVETPSLQK	381449	463493	2.40292e+06	1.23341e+06		1.0535e+06	1.98468e+06	724098	449801	1.07971e+06	745721	2.37935e+06	220993	337612	641992	1.47001e+06	7	8	8	7	0.859284	0.506394	0.526104	0.572652
Q3UNH4	Gprin1	G protein-regulated inducer of neurite outgrowth 1	681	DLAAAAAQKSPSAEAAAPPPGPR	monophos-(681)DLAAAAAQKSPSAEAAAPPPGPR	4.21144e+06	6.99045e+06	8.59193e+06	3.42507e+06	2.00925e+06	2.11448e+06	4.86942e+06	4.04805e+06	7.41736e+06	8.91135e+06	6.98229e+06	5.25964e+06	1.42566e+06	956802	6.79863e+06	1.31431e+07	8	8	8	8	0.171375	0.275289	0.081632	0.218061
Q3UNH4	Gprin1	G protein-regulated inducer of neurite outgrowth 1	711	APSWDAGAPPPR	monophos-(711)APSWDAGAPPPR	2.66308e+06	3.43041e+06	2.65871e+06	3.64863e+06	628664	1.09279e+06	5.86182e+06	2.88499e+06	3.92819e+06	4.06796e+06	4.80125e+06	3.13968e+06	555151	990505	3.63381e+06	5.22344e+06	8	8	8	8	0.903763	0.607042	0.0116855	0.271471
Q3UNH4	Gprin1	G protein-regulated inducer of neurite outgrowth 1	761	APSPAPRPPSRR	diphos-(761)APSPAPRPPSRR	194021	296324				139967		327535			534315						4	1	3	2	#DIV/0!	#DIV/0!	0.946404	0.518354
Q3UNH4	Gprin1	G protein-regulated inducer of neurite outgrowth 1	761	APSPAPRPPSRR	monophos-(761)APSPAPRPPSRR	313960	1.41373e+06	643963	460598		454278		281248	360234			503607	105378		826205	696012	6	5	6	5	0.459902	0.674322	0.548342	0.52902
Q3UNH4	Gprin1	G protein-regulated inducer of neurite outgrowth 1	787	SVATGPMTPQAAAPPAVPPVFPEVR	monophos-(787)SVATGPMTPQAAAPPAVPPVFPEVR	418684	304768	2.05631e+06	1.54273e+06		554954	1.08993e+06	556031	353761	503536	548373	906329	267880	253330	1.19435e+06	2.17157e+06	7	8	8	7	0.963859	0.650892	0.863697	0.907643
Q8BWS5	Gprin3	G protein-regulated inducer of neurite outgrowth 3	322	SVSTSPSILPAYLK	diphos-(322)SVSTSPSILPAYLK	134414	237991	1.15748e+06	1.57399e+06	641246	430552	3.59108e+06	1.53357e+06	273691	315288	1.82911e+06	1.7448e+06	543864	452746	1.57772e+06	1.73359e+06	8	8	8	8	0.252648	0.829549	0.352668	0.394849
Q8BWS5	Gprin3	G protein-regulated inducer of neurite outgrowth 3	322	SVSTSPSILPAYLK	monophos-(322)SVSTSPSILPAYLK	66813.8	64183.6		329571		99912.2	627771	396511	127811		422475	781193	86567.6		360846	1.18156e+06	6	6	6	6	0.207604	0.266381	0.420959	0.445224
Q99LD4	Gps1	COP9 signalosome complex subunit 1	447	SPPREGSQGELTPANSQSR	monophos-(447)SPPREGSQGELTPANSQSR	1.75343e+06	1.28481e+06	1.69032e+06		1.0642e+06				6.1694e+06	5.98063e+06	2.85338e+06		577014	584916	977877		4	6	6	4	0.00606529	0.249044	0.00477146	0.0402758
Q99LD4	Gps1	COP9 signalosome complex subunit 1	451	EGSQGELTPANSQSR	monophos-(451)EGSQGELTPANSQSR	457031	547521	850505		453289	196127		371669	466832	269139	1.156e+06		155588	316967		403695	6	6	6	6	0.298459	0.918091	0.0460263	0.0677164
Q6IR34	Gpsm1	G-protein-signaling modulator 1	487	APSSDEECFFDLLSK	diphos-(487)APSSDEECFFDLLSK	59850	220954	1.16391e+06	427067	501236	381184	94985.6	511733	208107	227434	412655	928708	673928	737219	1.07758e+06	688498	8	8	8	8	0.800057	0.249367	0.447506	0.468443
Q6IR34	Gpsm1	G-protein-signaling modulator 1	487	APSSDEECFFDLLSK	monophos-(487)APSSDEECFFDLLSK	340161	546933	1.11999e+06	585943	899808	578545	627980	670081	594254	609088	791153	1.05156e+06	661643	706245	1.41058e+06	1.00973e+06	8	8	8	8	0.654586	0.183674	0.895764	0.410257
Q6IR34	Gpsm1	G-protein-signaling modulator 1	534	AAQSSVTASPQTEEFFDLIASSQSR	diphos-(534)AAQSSVTASPQTEEFFDLIASSQSR		36414.3				68460.4		237992			98882.1		78212.2				3	2	2	3	0.189957	0.771756	0.623541	0.476635
Q80TI0	Gramd1b	GRAM domain-containing protein 1B	27	SRSPTPQNQDGDTMVEK	monophos-(27)SRSPTPQNQDGDTMVEK			294764						207250	178805	248150					240185	1	4	4	1	#DIV/0!	#DIV/0!	#DIV/0!	#DIV/0!
Q80TI0	Gramd1b	GRAM domain-containing protein 1B	44	GSDHSSDKSPSTPEQGVQR	monophos-(44)GSDHSSDKSPSTPEQGVQR			1.14186e+06														1	0	1	0	#DIV/0!	#DIV/0!	#DIV/0!	#DIV/0!
Q8CB44	Gramd4	GRAM domain-containing protein 4	65	REDLLDLAESPNASDTECGDEIPLK	diphos-(65)REDLLDLAESPNASDTECGDEIPLK														114655			0	1	0	1	#DIV/0!	#DIV/0!	#DIV/0!	#DIV/0!
Q9JJA9	Grasp	General receptor for phosphoinositides 1-associated scaffold protein	88	NFTQSPEQQR	monophos-(88)NFTQSPEQQR	151630	665536	205890			66257.8				1.31608e+06	227857					2.62483e+06	4	3	5	2	0.0368554	0.245642	0.0429501	0.632118
Q9JJA9	Grasp	General receptor for phosphoinositides 1-associated scaffold protein	231	DPSIYDTLESVR	monophos-(231)DPSIYDTLESVR		89215.3								150183							1	1	2	0	#DIV/0!	#DIV/0!	#DIV/0!	#DIV/0!
Q9JJA9	Grasp	General receptor for phosphoinositides 1-associated scaffold protein	376	FIPGLNRSLEEEESQL	monophos-(376)FIPGLNRSLEEEESQL	194687	179422				94574.9					200432						3	1	3	1	#DIV/0!	#DIV/0!	#DIV/0!	#DIV/0!
O88273	Grem2	Gremlin-2	50	EVLASSQEALVVTER	monophos-(50)EVLASSQEALVVTER	148867	219040	318032	113204	309453		232232				301258	282973			179286		6	3	6	3	0.862828	0.59215	0.827703	0.867509
Q01097	Grin2b	Glutamate receptor ionotropic, NMDA 2B	1300	QHSYDTFVDLQKEEAALAPR	monophos-(1300)QHSYDTFVDLQKEEAALAPR			430174										128596				1	1	1	1	#DIV/0!	#DIV/0!	#DIV/0!	#DIV/0!
Q8VD04	Gripap1	GRIP1-associated protein 1	607	TGLEELVLSEMNSPSR	monophos-(607)TGLEELVLSEMNSPSR	343235	518624	1.00878e+06	1.15355e+06		494649	965418	1.1226e+06	332495	101074	790825	672557	144282	452938	1.25088e+06	1.00383e+06	7	8	8	7	0.647579	0.308629	0.726813	0.432462
Q8VD04	Gripap1	GRIP1-associated protein 1	652	SLSSSPQAQPPRPAELSDEEVAELFQR	diphos-(652)SLSSSPQAQPPRPAELSDEEVAELFQR	166737	292817	894166	2.00397e+06		2.45322e+06	1.68745e+06	2.99432e+06	170294	499543	1.13985e+06	599157	269876	530406	2.05048e+06	1.85911e+06	7	8	8	7	0.308057	0.216075	0.256244	0.0373042
Q8VD04	Gripap1	GRIP1-associated protein 1	652	SLSSSPQAQPPRPAELSDEEVAELFQR	monophos-(652)SLSSSPQAQPPRPAELSDEEVAELFQR	1.18743e+06	1.09856e+06	2.19921e+06	966724		684667	1.771e+06	1.73732e+06	2.10752e+06	826028	2.5875e+06	2.38232e+06	625828	956483	2.26382e+06	5.76506e+06	7	8	8	7	0.0144796	0.220147	0.0300827	0.685683
Q8VD04	Gripap1	GRIP1-associated protein 1	790	ECVGSPDPDLEPGEAN	monophos-(790)ECVGSPDPDLEPGEAN							848054									528926	1	1	0	2	#DIV/0!	#DIV/0!	#DIV/0!	#DIV/0!
Q8VEB1	Grk5	G protein-coupled receptor kinase 5	475	DVLDIEQFSTVK	diphos-(475)DVLDIEQFSTVK							368852										1	0	0	1	#DIV/0!	#DIV/0!	#DIV/0!	#DIV/0!
Q8VEB1	Grk5	G protein-coupled receptor kinase 5	475	DVLDIEQFSTVK	monophos-(475)DVLDIEQFSTVK		192368					383509			108502						419506	2	2	2	2	0.701661	0.907671	0.516214	0.031481
O70293	Grk6	G protein-coupled receptor kinase 6	475	DVLDIEQFSTVKGVDLEPTDQDFYQK	diphos-(475)DVLDIEQFSTVKGVDLEPTDQDFYQK		67543.8	691892				368852	2.06227e+06				220726	103346	118000		2.44037e+06	4	4	3	5	0.674348	0.918668	0.153967	0.356271
O70293	Grk6	G protein-coupled receptor kinase 6	475	DVLDIEQFSTVK	monophos-(475)DVLDIEQFSTVK		192368					383509			108502						419506	2	2	2	2	0.701661	0.907671	0.516214	0.031481
Q9QYS2	Grm3	Metabotropic glutamate receptor 3	869	EVLDSTTSSL	monophos-(869)EVLDSTTSSL					123958												1	0	0	1	#DIV/0!	#DIV/0!	#DIV/0!	#DIV/0!
Q3UVX5	Grm5	Metabotropic glutamate receptor 5	857	SSSLVNLWK	monophos-(857)SSSLVNLWK		53773.7															1	0	1	0	#DIV/0!	#DIV/0!	#DIV/0!	#DIV/0!
Q3UVX5	Grm5	Metabotropic glutamate receptor 5	1013	SPSPISTLSHLAGSAGR	diphos-(1013)SPSPISTLSHLAGSAGR		260636	1.12378e+06	280626	382382	180911	331600			411226			1.12005e+06	124264	437145		6	4	4	6	0.657109	0.702588	0.743807	0.722939
Q68ED2	Grm7	Metabotropic glutamate receptor 7	889	TELCENVDPNSPAAK	monophos-(889)TELCENVDPNSPAAK					132763								63089.9				1	1	0	2	#DIV/0!	#DIV/0!	#DIV/0!	#DIV/0!
Q2NL51	Gsk3a	Glycogen synthase kinase-3 alpha	16	ARTSSFAEPGGGGGGGGGGPGGSASGPGGTGGGK	monophos-(16)ARTSSFAEPGGGGGGGGGGPGGSASGPGGTGGGK									205045								0	1	1	0	#DIV/0!	#DIV/0!	#DIV/0!	#DIV/0!
Q2NL51	Gsk3a	Glycogen synthase kinase-3 alpha	18	TSSFAEPGGGGGGGGGGPGGSASGPGGTGGGK	monophos-(18)TSSFAEPGGGGGGGGGGPGGSASGPGGTGGGK	929029	7.51663e+06	2.93928e+06	839579	874774	944028			2.07387e+06	5.91856e+06	1.78758e+06		209189	1.70543e+06		2.05036e+06	6	6	7	5	0.480925	0.971084	0.0283735	0.0933908
Q2NL51	Gsk3a	Glycogen synthase kinase-3 alpha	272	GEPNVSYICSR	diphos-(272)GEPNVSYICSR			2.62968e+06	601709	341577			545542	537651	739936		734833	258026	303261		815647	4	6	5	5	0.00640612	0.452954	0.0229807	0.211837
Q2NL51	Gsk3a	Glycogen synthase kinase-3 alpha	272	GEPNVSYICSR	monophos-(272)GEPNVSYICSR	7.72456e+06	1.74593e+07	3.05502e+07	8.38283e+06	1.66875e+07	6.15805e+06	1.21036e+07	8.33849e+06	2.05671e+07	1.32602e+07	2.55796e+07	3.39355e+06	1.91154e+07	1.01081e+07	8.83361e+06	1.35007e+07	8	8	8	8	0.751819	0.823207	0.0632706	0.29337
Q9WV60	Gsk3b	Glycogen synthase kinase-3 beta	6	TTSFAESCKPVQQPSAFGSMK	diphos-(6)TTSFAESCKPVQQPSAFGSMK	46413.8	85102.6	311199		990553	126757					218404		117507	238209			5	3	4	4	0.0532632	0.627119	0.0727106	0.387641
Q9WV60	Gsk3b	Glycogen synthase kinase-3 beta	6	TTSFAESCKPVQQPSAFGSMK	monophos-(6)TTSFAESCKPVQQPSAFGSMK		99877.7			197347				127300		443894		108339	124811			2	4	3	3	0.601306	0.696605	0.115599	0.519609
Q9WV60	Gsk3b	Glycogen synthase kinase-3 beta	209	GEPNVSYICSR	diphos-(209)GEPNVSYICSR			2.62968e+06	601709	341577			545542	537651	739936		734833	258026	303261		815647	4	6	5	5	0.00640612	0.452954	0.0229807	0.211837
Q9WV60	Gsk3b	Glycogen synthase kinase-3 beta	209	GEPNVSYICSR	monophos-(209)GEPNVSYICSR	7.72456e+06	1.74593e+07	3.05502e+07	8.38283e+06	1.66875e+07	6.15805e+06	1.21036e+07	8.33849e+06	2.05671e+07	1.32602e+07	2.55796e+07	3.39355e+06	1.91154e+07	1.01081e+07	8.83361e+06	1.35007e+07	8	8	8	8	0.751819	0.823207	0.0632706	0.29337
Q9WV60	Gsk3b	Glycogen synthase kinase-3 beta	383	IQAAASPPANATAASDTNAGDR	monophos-(383)IQAAASPPANATAASDTNAGDR	1.36168e+06	1.60997e+06	5.57075e+06	243137	1.50106e+06	427204	283383	809777	4.45342e+06	1.74824e+06	3.30888e+06	1.11577e+06	414563	1.43392e+06		1.53865e+06	8	7	8	7	0.599256	0.534026	0.010445	0.0557741
Q9JI57	Gtf2ird1	General transcription factor II-I repeat domain-containing protein 1	1017	RVSEGNSVSSSSSSSSSSSNPESVASTNQISLVVK	diphos-(1017)RVSEGNSVSSSSSSSSSSSNPESVASTNQISLVVK					361309						540872						1	1	1	1	#DIV/0!	#DIV/0!	#DIV/0!	#DIV/0!
O08582	Gtpbp1	GTP-binding protein 1	5	SRSPVDSPVPASMFAPEPSSPGAAR	diphos-(5)SRSPVDSPVPASMFAPEPSSPGAAR	615869	1.61015e+06	5.34555e+06	2.15716e+06	4.29221e+06	807438	3.1734e+06	1.89247e+06	1.54415e+06	3.30309e+06	1.27958e+06	2.65669e+06	2.45396e+06	2.42952e+06	639551	1.72768e+06	8	8	8	8	0.101608	0.478845	0.59681	0.841983
O08582	Gtpbp1	GTP-binding protein 1	5	SRSPVDSPVPASMFAPEPSSPGAAR	monophos-(5)SRSPVDSPVPASMFAPEPSSPGAAR									303136	349982							0	2	2	0	#DIV/0!	#DIV/0!	#DIV/0!	#DIV/0!
O08582	Gtpbp1	GTP-binding protein 1	37	LHGGFDSDCSEDGEALNGEPELDLTSK	diphos-(37)LHGGFDSDCSEDGEALNGEPELDLTSK													369886				0	1	0	1	#DIV/0!	#DIV/0!	#DIV/0!	#DIV/0!
P14429	H2-Q7	H-2 class I histocompatibility antigen, Q7 alpha chain	274	EQNYTCHVNHEGLPEPLTLR	monophos-(274)EQNYTCHVNHEGLPEPLTLR																697176	0	1	0	1	#DIV/0!	#DIV/0!	#DIV/0!	#DIV/0!
P14430	H2-Q8	H-2 class I histocompatibility antigen, Q8 alpha chain	274	EQNYTCHVNHEGLPEPLTLR	monophos-(274)EQNYTCHVNHEGLPEPLTLR																697176	0	1	0	1	#DIV/0!	#DIV/0!	#DIV/0!	#DIV/0!
Q9JKS5	Habp4	Intracellular hyaluronan-binding protein 4	95	KSLAASGAQQPDSPGGPQPPGQK	monophos-(95)KSLAASGAQQPDSPGGPQPPGQK	440971	463192	711269			174604	287476		905104	490739	575191			117029		622834	5	5	6	4	0.531215	0.44063	0.61	0.0490245
Q99KK9	Hars2	Probable histidine--tRNA ligase, mitochondrial	63	DLSPQQMVVR	monophos-(63)DLSPQQMVVR	232963	255176	580143				801333	693918	391380	214293	623462	629152			455260	673811	5	6	7	4	0.435317	0.912611	0.706651	0.0594731
P01942	Hba	Hemoglobin subunit alpha	100	LLSHCLLVTLASHHPADFTPAVHASLDK	monophos-(100)LLSHCLLVTLASHHPADFTPAVHASLDK											266487					518666	0	2	1	1	#DIV/0!	#DIV/0!	#DIV/0!	#DIV/0!
P02088	Hbb-b1	Hemoglobin subunit beta-1	83	GTFASLSELHCDK	monophos-(83)GTFASLSELHCDK							166655										1	0	0	1	#DIV/0!	#DIV/0!	#DIV/0!	#DIV/0!
P02089	Hbb-b2	Hemoglobin subunit beta-2	83	GTFASLSELHCDK	monophos-(83)GTFASLSELHCDK							166655										1	0	0	1	#DIV/0!	#DIV/0!	#DIV/0!	#DIV/0!
O88703	Hcn2	Potassium/sodium hyperpolarization-activated cyclic nucleotide-gated channel 2	105	GAASGPSAAEEAGSEEAGPAGEPR	monophos-(105)GAASGPSAAEEAGSEEAGPAGEPR		339478	650274		193800								120479				3	1	2	2	#DIV/0!	#DIV/0!	0.294982	0.168679
O88703	Hcn2	Potassium/sodium hyperpolarization-activated cyclic nucleotide-gated channel 2	731	RAPPGPLPPAASPGPPAASPPAAPSSPR	diphos-(731)RAPPGPLPPAASPGPPAASPPAAPSSPR		1.87162e+06		459239	2.10732e+06				928923	3.10663e+06			4.64496e+06				3	3	4	2	0.371163	0.302028	0.444314	0.202239
O88703	Hcn2	Potassium/sodium hyperpolarization-activated cyclic nucleotide-gated channel 2	731	RAPPGPLPPAASPGPPAASPPAAPSSPR	monophos-(731)RAPPGPLPPAASPGPPAASPPAAPSSPR										3.52289e+06							0	1	1	0	#DIV/0!	#DIV/0!	#DIV/0!	#DIV/0!
O88703	Hcn2	Potassium/sodium hyperpolarization-activated cyclic nucleotide-gated channel 2	762	TSPYGVPGSPATR	diphos-(762)TSPYGVPGSPATR					285778												1	0	0	1	#DIV/0!	#DIV/0!	#DIV/0!	#DIV/0!
O88703	Hcn2	Potassium/sodium hyperpolarization-activated cyclic nucleotide-gated channel 2	787	ASRPLSASQPSLPHGVPAPSPAASARPASSSTPR	diphos-(787)ASRPLSASQPSLPHGVPAPSPAASARPASSSTPR													324385				0	1	0	1	#DIV/0!	#DIV/0!	#DIV/0!	#DIV/0!
O88703	Hcn2	Potassium/sodium hyperpolarization-activated cyclic nucleotide-gated channel 2	837	RDSASPGAASGLDPLDSAR	monophos-(837)RDSASPGAASGLDPLDSAR		386302							237580	674714							1	2	3	0	#DIV/0!	#DIV/0!	#DIV/0!	#DIV/0!
O88703	Hcn2	Potassium/sodium hyperpolarization-activated cyclic nucleotide-gated channel 2	838	DSASPGAASGLDPLDSAR	monophos-(838)DSASPGAASGLDPLDSAR		248191	465676	306793	910617		239263		456644	718466			447113				5	3	5	3	0.486926	0.575066	0.259499	0.625429
O09106	Hdac1	Histone deacetylase 1	371	MLPHAPGVQMQAIPEDAIPEESGDEDEEDPDKR	monophos-(371)MLPHAPGVQMQAIPEDAIPEESGDEDEEDPDKR	196568		962412		963363		714766	642451	548042		490773					980120	5	3	4	4	0.922317	0.919914	0.345451	0.175687
P70288	Hdac2	Histone deacetylase 2	372	MLPHAPGVQMQAIPEDAVHEDSGDEDGEDPDKR	monophos-(372)MLPHAPGVQMQAIPEDAVHEDSGDEDGEDPDKR	1.54048e+06	1.44837e+06	6.17224e+06	123391	711734		1.15927e+06	1.76903e+06	1.86841e+06	1.01779e+06	2.16564e+06	528866	403397	462567	1.38745e+06	1.2768e+06	7	8	8	7	0.0103176	0.397682	0.00561974	0.259712
P70288	Hdac2	Histone deacetylase 2	414	IACDEEFSDSEDEGEGGRR	diphos-(414)IACDEEFSDSEDEGEGGRR			2.57211e+06														1	0	1	0	#DIV/0!	#DIV/0!	#DIV/0!	#DIV/0!
Q6NZM9	Hdac4	Histone deacetylase 4	626	AQSSPASATFPMSVQEPPTKPR	monophos-(626)AQSSPASATFPMSVQEPPTKPR						378213											1	0	0	1	#DIV/0!	#DIV/0!	#DIV/0!	#DIV/0!
Q99N13	Hdac9	Histone deacetylase 9	308	ILIHEDSMNLLSLYTSPSLPNITLGLPAVPSPLNASNSLKDK	monophos-(308)ILIHEDSMNLLSLYTSPSLPNITLGLPAVPSPLNASNSLKDK											42998.8						0	1	1	0	#DIV/0!	#DIV/0!	#DIV/0!	#DIV/0!
P51859	Hdgf	Hepatoma-derived growth factor	126	GSAEGSSDEEGKLVIDEPAK	diphos-(126)GSAEGSSDEEGKLVIDEPAK	1.23133e+06	6.46091e+06	8.14086e+06	4.78674e+06	2.00508e+06	298418		1.21789e+07	3.04436e+06	1.76354e+06	9.43242e+06	9.42124e+06	873958	2.90166e+06	3.81874e+06	1.29773e+07	7	8	8	7	0.937523	0.82298	0.246968	0.818606
P51859	Hdgf	Hepatoma-derived growth factor	126	GSAEGSSDEEGKLVIDEPAK	monophos-(126)GSAEGSSDEEGKLVIDEPAK	141589	115542	427927		92751.8			329191		216265	426461	329561			252976	818912	5	5	6	4	0.364331	0.179388	0.111282	0.514182
P51859	Hdgf	Hepatoma-derived growth factor	156	RAGDVLEDSPK	monophos-(156)RAGDVLEDSPK	1.37974e+06	2.22067e+06	1.97262e+06	217258	1.40096e+06	639277	3.42144e+06	2.20644e+06	452092	616485	1.26535e+07	558777	875154	660454	949261	5.58073e+06	8	8	8	8	0.00100571	0.501207	0.034973	0.741586
P51859	Hdgf	Hepatoma-derived growth factor	197	NSTPSEPDSGQGPPAEEEEGEEEAAKEEAEAQGVR	diphos-(197)NSTPSEPDSGQGPPAEEEEGEEEAAKEEAEAQGVR	83671.3	576895	2.26907e+06	102114	618513	76784.6		370869	165815	464369	1.87312e+06	853665				560128	7	5	8	4	0.776065	0.653795	0.0683482	0.389127
P51859	Hdgf	Hepatoma-derived growth factor	197	NSTPSEPDSGQGPPAEEEEGEEEAAKEEAEAQGVR	monophos-(197)NSTPSEPDSGQGPPAEEEEGEEEAAKEEAEAQGVR	904948	787042	3.36261e+06		1.04725e+06	149029		1.43446e+06	2.02735e+06	1.1567e+06	7.82459e+06	1.00475e+06	175338	647726		2.34552e+06	6	7	7	6	0.0789322	0.45529	0.0278471	0.189815
Q3UMU9	Hdgfrp2	Hepatoma-derived growth factor-related protein 2	363	GGSSGEELEDEEPVKK	diphos-(363)GGSSGEELEDEEPVKK			1.47335e+06	554302			938750				836406			513605	897766		3	3	3	3	0.333221	0.457959	0.397616	0.602795
Q3UMU9	Hdgfrp2	Hepatoma-derived growth factor-related protein 2	625	GGSSEELHDSPRDNSDPAKPGNER	monophos-(625)GGSSEELHDSPRDNSDPAKPGNER			749736								45234.9						1	1	2	0	#DIV/0!	#DIV/0!	#DIV/0!	#DIV/0!
Q9JMG7	Hdgfrp3	Hepatoma-derived growth factor-related protein 3	95	FTGYQTIQQQSSSETEGEGGNTADASSEEEGDRVEDGK	diphos-(95)FTGYQTIQQQSSSETEGEGGNTADASSEEEGDRVEDGK			1.18821e+06	88461.6								493789				158259	2	2	3	1	0.377039	0.641412	#DIV/0!	#DIV/0!
Q9JMG7	Hdgfrp3	Hepatoma-derived growth factor-related protein 3	95	FTGYQTIQQQSSSETEGEGGNTADASSEEEGDRVEDGK	monophos-(95)FTGYQTIQQQSSSETEGEGGNTADASSEEEGDRVEDGK			112307														1	0	1	0	#DIV/0!	#DIV/0!	#DIV/0!	#DIV/0!
Q9R257	Hebp1	Heme-binding protein 1	103	IPNQFQGSPPAPSDESVKIEER	monophos-(103)IPNQFQGSPPAPSDESVKIEER		615748	854529	498773	904448		472837	185492			846261	739156					6	2	5	3	0.424632	0.347494	0.139072	0.32646
Q69ZR2	Hectd1	E3 ubiquitin-protein ligase HECTD1	624	VSALAGPSSDDENEEESKPEKEDEPQEDAK	monophos-(624)VSALAGPSSDDENEEESKPEKEDEPQEDAK			795740		148136											466930	2	1	1	2	#DIV/0!	#DIV/0!	#DIV/0!	#DIV/0!
Q6I6G8	Hecw2	E3 ubiquitin-protein ligase HECW2	45	ANSDTDLVTSESR	monophos-(45)ANSDTDLVTSESR		214902	557476		110104					331554	657398						3	2	4	1	0.857149	0.415422	#DIV/0!	#DIV/0!
Q6I6G8	Hecw2	E3 ubiquitin-protein ligase HECW2	855	SNSIQQMEQLNR	monophos-(855)SNSIQQMEQLNR		293981	631316	305727			1.07385e+06		375424	407974			174833	147624			4	4	5	3	0.132755	0.175646	0.0277989	0.857659
Q640R3	Hepacam	Hepatocyte cell adhesion molecule	277	QNSLEYMDQNDDRLK	monophos-(277)QNSLEYMDQNDDRLK	2.09406e+06	3.03393e+06	6.40368e+06	712123	2.91198e+06	933820	3.29471e+06	2.51023e+06	3.46264e+06	2.87147e+06	5.58627e+06	834421	1.6135e+06	1.44651e+06	1.08273e+06	4.45184e+06	8	8	8	8	0.959769	0.938787	0.205075	0.333127
Q640R3	Hepacam	Hepatocyte cell adhesion molecule	316	DKDSSEPDENPATEPR	monophos-(316)DKDSSEPDENPATEPR	133482	562654	1.16521e+06	395630			711651										5	0	4	1	#DIV/0!	#DIV/0!	#DIV/0!	#DIV/0!
Q640R3	Hepacam	Hepatocyte cell adhesion molecule	332	STTEPGPPGYSVSPPVPGRSPGLPIR	monophos-(332)STTEPGPPGYSVSPPVPGRSPGLPIR	1.12997e+06	1.66392e+06	645775	1.24894e+06	908370	933877	3.59084e+06	1.75138e+06	1.06956e+06	1.68521e+06	1.27073e+06	1.63167e+06	361135	829056	1.09189e+06	2.05146e+06	8	8	8	8	0.167298	0.545146	0.0132639	0.710924
Q640R3	Hepacam	Hepatocyte cell adhesion molecule	375	THTSPPRAPSSPGR	diphos-(375)THTSPPRAPSSPGR	3.91908e+06	1.30087e+07	4.69974e+06	4.34657e+06	1.15377e+07	4.7058e+06	9.78968e+06	5.57933e+06	6.63307e+06	1.01417e+07	1.60433e+06	6.34584e+06	1.47271e+07	5.71785e+06	9.02691e+06	3.06293e+06	8	8	8	8	0.745505	0.983603	0.856026	0.39137
Q640R3	Hepacam	Hepatocyte cell adhesion molecule	375	THTSPPRAPSSPGR	monophos-(375)THTSPPRAPSSPGR					272780								682258				1	1	0	2	#DIV/0!	#DIV/0!	#DIV/0!	#DIV/0!
Q8R1F6	Hid1	Protein HID1	165	NDVDSAEDVHSLDSCEYIWEAGVGFAHSPQPNYIHDMNR	diphos-(165)NDVDSAEDVHSLDSCEYIWEAGVGFAHSPQPNYIHDMNR		359535															1	0	1	0	#DIV/0!	#DIV/0!	#DIV/0!	#DIV/0!
Q8R1F6	Hid1	Protein HID1	583	TPEPLSRTGSQEGTSMEGSRPAAPAEPGTLK	diphos-(583)TPEPLSRTGSQEGTSMEGSRPAAPAEPGTLK	687806		826439							1.31154e+06							2	1	3	0	#DIV/0!	#DIV/0!	#DIV/0!	#DIV/0!
Q8R1F6	Hid1	Protein HID1	590	TGSQEGTSMEGSRPAAPAEPGTLK	monophos-(590)TGSQEGTSMEGSRPAAPAEPGTLK	284112	542639	888574						778436	1.6674e+06	411057		369938				3	4	6	1	0.417513	0.568734	#DIV/0!	#DIV/0!
Q8K1K9	Hinfp	Histone H4 transcription factor	187	SHTQEKVVACPTCGGMFANNTK	monophos-(187)SHTQEKVVACPTCGGMFANNTK																7.88385e+06	0	1	0	1	#DIV/0!	#DIV/0!	#DIV/0!	#DIV/0!
Q9CPS6	Hint3	Histidine triad nucleotide-binding protein 3	4	QAGLVGEPDPEGSSPGTSESWNYDSNCVFCR	monophos-(4)QAGLVGEPDPEGSSPGTSESWNYDSNCVFCR			100687								263217						1	1	2	0	#DIV/0!	#DIV/0!	#DIV/0!	#DIV/0!
Q3UHF7	Hivep2	Transcription factor HIVEP2	935	LADLEHSSGESSFESTGTGLSR	diphos-(935)LADLEHSSGESSFESTGTGLSR			1.1939e+06														1	0	1	0	#DIV/0!	#DIV/0!	#DIV/0!	#DIV/0!
Q3UHF7	Hivep2	Transcription factor HIVEP2	1428	MLSPASSLELFMETK	diphos-(1428)MLSPASSLELFMETK			189149														1	0	1	0	#DIV/0!	#DIV/0!	#DIV/0!	#DIV/0!
P97825	Hn1	Hematological and neurological expressed 1 protein	84	SNSSEASSGDFLDLK	monophos-(84)SNSSEASSGDFLDLK	212125	633423	591664	274589	576525		795828	181033	375004	417371	683459	382915	112973		194237	592325	7	7	8	6	0.676088	0.552663	0.229537	0.762199
Q9CX86	Hnrnpa0	Heterogeneous nuclear ribonucleoprotein A0	81	AVSREDSARPGAHAK	monophos-(81)AVSREDSARPGAHAK											12861.3						0	1	1	0	#DIV/0!	#DIV/0!	#DIV/0!	#DIV/0!
P49312	Hnrnpa1	Heterogeneous nuclear ribonucleoprotein A1	3	SESPKEPEQLR	monophos-(3)SESPKEPEQLR	1.92138e+06	2.60743e+06		1.88494e+06	1.08034e+06				1.58858e+06	2.31644e+06	6.03307e+06	2.17944e+06		1.23313e+06	3.00975e+06	3.22717e+06	4	7	7	4	0.152975	0.302698	0.671619	0.57837
Q8BG05	Hnrnpa3	Heterogeneous nuclear ribonucleoprotein A3	355	SSGSPYGGGYGSGGGSGGYGSR	monophos-(355)SSGSPYGGGYGSGGGSGGYGSR		264305	354200							134115					174810	154477	2	3	3	2	0.178005	0.0244926	0.182985	0.374352
Q9Z204	Hnrnpc	Heterogeneous nuclear ribonucleoproteins C1/C2	258	MESEAGADDSAEEGDLLDDDDNEDRGDDQLELK	monophos-(258)MESEAGADDSAEEGDLLDDDDNEDRGDDQLELK			389001														1	0	1	0	#DIV/0!	#DIV/0!	#DIV/0!	#DIV/0!
Q60668	Hnrnpd	Heterogeneous nuclear ribonucleoprotein D0	67	IDASKNEEDEGHSNSSPR	diphos-(67)IDASKNEEDEGHSNSSPR		121494		181858				121003	63696.7		101707	216465				520978	3	4	5	2	0.0556796	0.526309	0.0202124	0.525016
Q60668	Hnrnpd	Heterogeneous nuclear ribonucleoprotein D0	67	IDASKNEEDEGHSNSSPR	monophos-(67)IDASKNEEDEGHSNSSPR	747056	1.5162e+06	529440	644038	108229		765213	1.19336e+06	1.71752e+06	246166	1.04116e+06	794096	189255	911856	444278	4.81432e+06	7	8	8	7	0.00938087	0.413874	0.0060277	0.656259
O35737	Hnrnph1	Heterogeneous nuclear ribonucleoprotein H	98	HTGPNSPDTANDGFVR	monophos-(98)HTGPNSPDTANDGFVR	1.12672e+06	1.61013e+06	3.86863e+06	452580	1.21346e+06	618047	1.56473e+06	1.69056e+06	2.0763e+06	1.27449e+06	3.46567e+06	811516	877838	619929	1.18243e+06	1.5961e+06	8	8	8	8	0.741979	0.95246	0.0126799	0.185341
P70333	Hnrnph2	Heterogeneous nuclear ribonucleoprotein H2	98	HTGPNSPDTANDGFVR	monophos-(98)HTGPNSPDTANDGFVR	1.12672e+06	1.61013e+06	3.86863e+06	452580	1.21346e+06	618047	1.56473e+06	1.69056e+06	2.0763e+06	1.27449e+06	3.46567e+06	811516	877838	619929	1.18243e+06	1.5961e+06	8	8	8	8	0.741979	0.95246	0.0126799	0.185341
P61979	Hnrnpk	Heterogeneous nuclear ribonucleoprotein K	103	IIPTLEEGLQLPSPTATSQLPLESDAVECLNYQHYK	monophos-(103)IIPTLEEGLQLPSPTATSQLPLESDAVECLNYQHYK											218813						0	1	1	0	#DIV/0!	#DIV/0!	#DIV/0!	#DIV/0!
P61979	Hnrnpk	Heterogeneous nuclear ribonucleoprotein K	277	RDYDDMSPR	monophos-(277)RDYDDMSPR	889241	1.66036e+06	4.48978e+06	866040		554812	3.88967e+06	2.29357e+06	1.21095e+06		5.60112e+06				1.43385e+06	4.54802e+06	7	4	6	5	0.425654	0.352461	0.70114	0.938436
Q8VEK3	Hnrnpu	Heterogeneous nuclear ribonucleoprotein U	244	AKSPQPPVEEEDEHFDDTVVCLDTYNCDLHFK	monophos-(244)AKSPQPPVEEEDEHFDDTVVCLDTYNCDLHFK					1.8755e+06				374123				355462				1	2	1	2	#DIV/0!	#DIV/0!	#DIV/0!	#DIV/0!
Q8VDM6	Hnrnpul1	Heterogeneous nuclear ribonucleoprotein U-like protein 1	192	GRSPQPPAEEDEDDFDDTLVAIDTYNCDLHFK	monophos-(192)GRSPQPPAEEDEDDFDDTLVAIDTYNCDLHFK	303783	285250	729534		329543			368724	523705	505357	288784		257660			337170	5	5	6	4	0.456972	0.839539	0.0514704	0.248405
Q00PI9	Hnrnpul2	Heterogeneous nuclear ribonucleoprotein U-like protein 2	158	SGDETPGSEAPGDK	monophos-(158)SGDETPGSEAPGDK	50530.4	173165		260845			294553					317335				434401	4	2	4	2	0.994905	0.11222	0.914822	0.166553
Q8BUK6	Hook3	Protein Hook homolog 3	226	LNQSDSIEDPNSPAGR	monophos-(226)LNQSDSIEDPNSPAGR	198712								320663	393464	444064						1	3	4	0	#DIV/0!	#DIV/0!	#DIV/0!	#DIV/0!
P09022	Hoxa1	Homeobox protein Hox-A1	21	AYPSDHGITTFQSCAVSANSCGGDDRFLVGR	diphos-(21)AYPSDHGITTFQSCAVSANSCGGDDRFLVGR					6.07357e+06		3.91243e+06	1.39655e+06			2.26733e+06		868605			6.71881e+06	3	3	1	5	0.739823	0.829961	#DIV/0!	#DIV/0!
P84075	Hpca	Neuron-specific calcium-binding protein hippocalcin	171	GAKSDPSIVR	monophos-(171)GAKSDPSIVR												721027		31088.2			0	2	1	1	#DIV/0!	#DIV/0!	#DIV/0!	#DIV/0!
P62748	Hpcal1	Hippocalcin-like protein 1	171	GAKSDPSIVR	monophos-(171)GAKSDPSIVR												721027		31088.2			0	2	1	1	#DIV/0!	#DIV/0!	#DIV/0!	#DIV/0!
P07901	Hsp90aa1	Heat shock protein HSP 90-alpha	226	DKEVSDDEAEEK	monophos-(226)DKEVSDDEAEEK			30592.9	23332.7		34051.6					180574			34740.4			3	2	3	2	0.0056053	0.476991	0.00776021	0.483022
P07901	Hsp90aa1	Heat shock protein HSP 90-alpha	250	ESDDKPEIEDVGSDEEEEEKK	monophos-(250)ESDDKPEIEDVGSDEEEEEKK	1.28364e+07	2.56223e+07	2.89637e+07	1.21549e+07	1.56816e+06	2.17286e+06	2.82126e+07	2.81728e+07	1.16665e+07	2.43756e+07	4.44117e+07	9.70315e+06		4.23401e+06	1.77136e+07	1.7645e+07	8	7	8	7	0.768028	0.869862	0.968965	0.275859
P11499	Hsp90ab1	Heat shock protein HSP 90-beta	221	EKEISDDEAEEEK	monophos-(221)EKEISDDEAEEEK	102874	305475		688712			697552	292607	229815	339864	131746	516621			610963	502624	5	6	7	4	0.458598	0.836355	0.82041	0.15221
P11499	Hsp90ab1	Heat shock protein HSP 90-beta	249	IEDVGSDEEDDSGKDK	monophos-(249)IEDVGSDEEDDSGKDK	6.8138e+06	1.2474e+07	1.65208e+07	1.7507e+07	2.83526e+06	785940	2.65928e+07	4.04021e+06	1.36652e+07	1.79892e+07	4.12499e+06	1.70453e+07	4.87698e+06	1.26834e+06	1.11132e+07	3.23817e+07	8	8	8	8	0.763192	0.700366	0.0389025	0.568553
Q8K0U4	Hspa12a	Heat shock 70 kDa protein 12A	14	ETAPTSTYSSPAR	diphos-(14)ETAPTSTYSSPAR			408388				1.99953e+06			621110	469966			167274		494907	2	4	3	3	0.0199417	0.510843	0.0247874	0.56387
Q8K0U4	Hspa12a	Heat shock 70 kDa protein 12A	14	ETAPTSTYSSPAR	monophos-(14)ETAPTSTYSSPAR	1.11295e+06	1.88302e+06	1.7017e+06	1.64487e+06	973945	466244	3.32632e+06		2.14006e+06	2.96907e+06	2.11867e+06	1.84893e+06	500257	567461	2.1139e+06	2.77676e+06	7	8	8	7	0.980241	0.545782	0.0513577	0.411205
Q8K0U4	Hspa12a	Heat shock 70 kDa protein 12A	625	LDLTGSGGTAVPAR	monophos-(625)LDLTGSGGTAVPAR							386095		323448	406777				68808.5	340237	466706	1	5	2	4	#DIV/0!	#DIV/0!	0.489487	0.725715
P16627	Hspa1l	Heat shock 70 kDa protein 1-like	130	ETAEAFLGHNVTNAVITVPAYFNDSQR	diphos-(130)ETAEAFLGHNVTNAVITVPAYFNDSQR							332325										1	0	0	1	#DIV/0!	#DIV/0!	#DIV/0!	#DIV/0!
P16627	Hspa1l	Heat shock 70 kDa protein 1-like	273	RTLSSSTQANLEIDSLYEGIDFYTSITR	monophos-(273)RTLSSSTQANLEIDSLYEGIDFYTSITR					122705												1	0	0	1	#DIV/0!	#DIV/0!	#DIV/0!	#DIV/0!
Q61316	Hspa4	Heat shock 70 kDa protein 4	521	MQVDQEEPHTEEQQQQPQTPAENKAESEEMETSQAGSK	monophos-(521)MQVDQEEPHTEEQQQQPQTPAENKAESEEMETSQAGSK		176344	323834						291766	291965	207697						2	3	5	0	0.329977	0.848244	#DIV/0!	#DIV/0!
P48722	Hspa4l	Heat shock 70 kDa protein 4L	69	LHGRSFDDPIVQTER	monophos-(69)LHGRSFDDPIVQTER	809471	1.23265e+06	2.0537e+06	2.65176e+06	1.08159e+06	531264	3.18768e+06	1.89095e+06	2.01493e+06	2.77576e+06	2.26585e+06	3.75448e+06	904948	823224	2.07495e+06	2.54657e+06	8	8	8	8	0.929456	0.341656	0.943459	0.244505
P48722	Hspa4l	Heat shock 70 kDa protein 4L	539	CHAEHTPEEEIDHTGAK	monophos-(539)CHAEHTPEEEIDHTGAK	166831	1.4022e+06	1.93019e+06		525395	94776.9			2.04816e+06	2.24324e+06	2.15154e+06		260614				5	4	6	3	0.742895	0.187777	0.144362	0.0245575
P48722	Hspa4l	Heat shock 70 kDa protein 4L	590	QLTQDLLNSYIENEGK	monophos-(590)QLTQDLLNSYIENEGK		138169											147191				1	1	1	1	#DIV/0!	#DIV/0!	#DIV/0!	#DIV/0!
P48722	Hspa4l	Heat shock 70 kDa protein 4L	799	AKTGSEHNGPMDGQSGSETSPDPPK	monophos-(799)AKTGSEHNGPMDGQSGSETSPDPPK																18487.3	0	1	0	1	#DIV/0!	#DIV/0!	#DIV/0!	#DIV/0!
P14602	Hspb1	Heat shock protein beta-1	12	SPSWEPFR	monophos-(12)SPSWEPFR	62405.8	143976	356520	204171	80962.9		470424	177631	74571.7	97861.7	253023	194531		26024.4	157205	324343	7	7	8	6	0.4141	0.459172	0.226919	0.651365
P14602	Hspb1	Heat shock protein beta-1	83	QLSSGVSEIR	monophos-(83)QLSSGVSEIR	237170	382589			361145		1.06333e+06	575826	357829	154749	541580	532737			487897	730058	5	6	6	5	0.289688	0.728408	0.254032	0.0622012
Q99P31	Hspbp1	Hsp70-binding protein 1	341	LLQTCFSSPTDDSMDR	monophos-(341)LLQTCFSSPTDDSMDR	1.09435e+06	153108			1.7452e+06	233198			252753	907400			622571				4	3	4	3	0.324589	0.67381	0.411322	0.596952
Q61699	Hsph1	Heat shock protein 105 kDa	500	VPTEEEDGSSLEADMECPNQRPTESSDVDK	monophos-(500)VPTEEEDGSSLEADMECPNQRPTESSDVDK										362652							0	1	1	0	#DIV/0!	#DIV/0!	#DIV/0!	#DIV/0!
Q61699	Hsph1	Heat shock protein 105 kDa	530	NIQQDNSEAGTQPQVQTDGQQTSQSPPSPELTSEESK	monophos-(530)NIQQDNSEAGTQPQVQTDGQQTSQSPPSPELTSEESK	260593		648484								475215					352067	2	2	3	1	0.391415	0.859296	#DIV/0!	#DIV/0!
Q61699	Hsph1	Heat shock protein 105 kDa	807	IESPKLER	monophos-(807)IESPKLER	2.26623e+06	7.6716e+06	4.03051e+06	4.3627e+06	3.63692e+06	1.44457e+06	5.5408e+06	4.36313e+06	5.90406e+06	1.05107e+07	5.14377e+06	6.73941e+06	2.14235e+06	1.43964e+06	7.31657e+06	8.11512e+06	8	8	8	8	0.253428	0.187003	0.957324	0.236653
Q8BGC0	Htatsf1	HIV Tat-specific factor 1 homolog	434	AEEGGESEGDASEKDAK	diphos-(434)AEEGGESEGDASEKDAK								16626.9									1	0	0	1	#DIV/0!	#DIV/0!	#DIV/0!	#DIV/0!
Q8BGC0	Htatsf1	HIV Tat-specific factor 1 homolog	615	EFEEDSDEKEEEGDDDEEEVVYER	monophos-(615)EFEEDSDEKEEEGDDDEEEVVYER								254260									1	0	0	1	#DIV/0!	#DIV/0!	#DIV/0!	#DIV/0!
P42859	Htt	Huntingtin	393	GRSGSIVELLAGGGSSCSPVLSR	diphos-(393)GRSGSIVELLAGGGSSCSPVLSR													157978				0	1	0	1	#DIV/0!	#DIV/0!	#DIV/0!	#DIV/0!
P42859	Htt	Huntingtin	395	SGSIVELLAGGGSSCSPVLSR	diphos-(395)SGSIVELLAGGGSSCSPVLSR		319578	2.05789e+06		517816		1.96068e+06			616845	497467		1.14313e+06	207866	356646		4	5	4	5	0.0986741	0.186867	0.818757	0.945827
P42859	Htt	Huntingtin	1846	SLNPQKSGEEEDSGSAAQLGMCNR	monophos-(1846)SLNPQKSGEEEDSGSAAQLGMCNR										520958			281843				0	2	1	1	#DIV/0!	#DIV/0!	#DIV/0!	#DIV/0!
Q7TMY8	Huwe1	E3 ubiquitin-protein ligase HUWE1	1894	IALPAPRGSGTASDDEFENLR	monophos-(1894)IALPAPRGSGTASDDEFENLR					205827							381143	472335				1	2	1	2	#DIV/0!	#DIV/0!	#DIV/0!	#DIV/0!
Q6ZPR6	Ibtk	Inhibitor of Bruton tyrosine kinase	990	SDSSGGYTLSDVIQSPPSAGLLKSAK	diphos-(990)SDSSGGYTLSDVIQSPPSAGLLKSAK								118692									1	0	0	1	#DIV/0!	#DIV/0!	#DIV/0!	#DIV/0!
P70404	Idh3g	Isocitrate dehydrogenase [NAD] subunit gamma 1, mitochondrial	350	AVLASMDNENMHTPDIGGQGTTSQAIQDIIR	diphos-(350)AVLASMDNENMHTPDIGGQGTTSQAIQDIIR					77144.5												1	0	0	1	#DIV/0!	#DIV/0!	#DIV/0!	#DIV/0!
Q6NWV3	Ift122	Intraflagellar transport protein 122 homolog	1066	ETSSNNSQTLKLDETMDSIGEDDPFTAK	diphos-(1066)ETSSNNSQTLKLDETMDSIGEDDPFTAK																2.20699e+06	0	1	0	1	#DIV/0!	#DIV/0!	#DIV/0!	#DIV/0!
Q61371	Ift88	Intraflagellar transport protein 88 homolog	283	TGQYSDAINSFEHIMSMAPSLKAGFNLILSCFAIGDR	monophos-(283)TGQYSDAINSFEHIMSMAPSLKAGFNLILSCFAIGDR											382631						0	1	1	0	#DIV/0!	#DIV/0!	#DIV/0!	#DIV/0!
Q9EQS9	Igdcc4	Immunoglobulin superfamily DCC subclass member 4	817	YEFAVQSHGVDMDGPFGSVVERSTLPDRPSTPPSDLR	monophos-(817)YEFAVQSHGVDMDGPFGSVVERSTLPDRPSTPPSDLR								175391									1	0	0	1	#DIV/0!	#DIV/0!	#DIV/0!	#DIV/0!
O54824	Il16	Pro-interleukin-16	876	FSGLLGQGATVTAK	monophos-(876)FSGLLGQGATVTAK				329784													1	0	1	0	#DIV/0!	#DIV/0!	#DIV/0!	#DIV/0!
Q8K5B1	Il31ra	Interleukin-31 receptor subunit alpha	562	SNMKETGNSGDTEDVVLKPCPVPADLIDK	diphos-(562)SNMKETGNSGDTEDVVLKPCPVPADLIDK																65965.6	0	1	0	1	#DIV/0!	#DIV/0!	#DIV/0!	#DIV/0!
Q9Z1X4	Ilf3	Interleukin enhancer-binding factor 3	474	DSSKGEDSAEESDGKPAIVAPPPVVEAVSNPSSVFPSDATTEQGPILTK	monophos-(474)DSSKGEDSAEESDGKPAIVAPPPVVEAVSNPSSVFPSDATTEQGPILTK																195724	0	1	0	1	#DIV/0!	#DIV/0!	#DIV/0!	#DIV/0!
O55023	Impa1	Inositol monophosphatase 1	36	SSPADLVTVTDQKVEK	monophos-(36)SSPADLVTVTDQKVEK					631496					2.27207e+06		361406	152345	1.25754e+06			1	4	2	3	#DIV/0!	#DIV/0!	0.270038	0.495881
O55091	Impact	Protein IMPACT	128	KTEEVEVESEEDPILEHPPENPVK	monophos-(128)KTEEVEVESEEDPILEHPPENPVK	6.28295e+06	1.35702e+06	1.18192e+07	942212	1.62322e+06	621249	1.89447e+06	7.32123e+06	3.47444e+06	1.64387e+06	7.67889e+06	2.36452e+06	621076	738554	3.74479e+06	5.90051e+06	8	8	8	8	0.222241	0.678844	0.320211	0.334157
P24547	Impdh2	Inosine-5'-monophosphate dehydrogenase 2	412	GMGSLDAMDK	monophos-(412)GMGSLDAMDK			185145					154720			266986				122469	150248	2	3	2	3	0.389155	0.875055	0.16066	0.0861512
Q9EPW0	Inpp4a	Type I inositol 3,4-bisphosphate 4-phosphatase	486	ASPTSTEEEQVMLR	monophos-(486)ASPTSTEEEQVMLR	259731	442087	437651	302613	118737	548151				277278	408036			723068			6	3	6	3	0.412477	0.382383	0.0184825	0.60853
Q8BKC5	Ipo5	Importin-5	814	RQDEDYDEQVEESLQDEDDNDVYILTK	monophos-(814)RQDEDYDEQVEESLQDEDDNDVYILTK		150209							221544		224761						1	2	3	0	#DIV/0!	#DIV/0!	#DIV/0!	#DIV/0!
Q8R0S2	Iqsec1	IQ motif and SEC7 domain-containing protein 1	82	LQHSTSVLR	monophos-(82)LQHSTSVLR	379210	1.32864e+06	575224		258894	223231	890004		1.21761e+06	940678	633743	478098	603429	189063			6	6	7	5	0.706499	0.772596	0.727564	0.106483
Q8R0S2	Iqsec1	IQ motif and SEC7 domain-containing protein 1	101	SRSLSESYELSSDLQDK	diphos-(101)SRSLSESYELSSDLQDK		344329			3.6367e+06								487017	981500	334640		2	3	1	4	0.0409102	0.55277	#DIV/0!	#DIV/0!
Q8R0S2	Iqsec1	IQ motif and SEC7 domain-containing protein 1	101	SRSLSESYELSSDLQDK	monophos-(101)SRSLSESYELSSDLQDK										127144							0	1	1	0	#DIV/0!	#DIV/0!	#DIV/0!	#DIV/0!
Q8R0S2	Iqsec1	IQ motif and SEC7 domain-containing protein 1	103	SLSESYELSSDLQDK	monophos-(103)SLSESYELSSDLQDK	150514	683444			274676	452830								106687	792224		4	2	2	4	0.254489	0.838875	0.578325	0.971603
Q8R0S2	Iqsec1	IQ motif and SEC7 domain-containing protein 1	175	MQFSFEGPEK	monophos-(175)MQFSFEGPEK	685811	1.431e+06	1.53719e+06	2.74672e+06	1.13151e+06	564514	4.17101e+06	1.32936e+06	900732	1.4053e+06	1.37611e+06	3.28907e+06	688053	573121	1.68035e+06	2.17155e+06	8	8	8	8	0.454189	0.726011	0.446125	0.805814
Q8R0S2	Iqsec1	IQ motif and SEC7 domain-containing protein 1	194	QVSVTNDGSQLGALVPSECGDLSDPALK	monophos-(194)QVSVTNDGSQLGALVPSECGDLSDPALK	196461	408990				209258				526262	375601			500959			3	3	4	2	0.62849	0.0777251	0.455891	0.880731
Q8R0S2	Iqsec1	IQ motif and SEC7 domain-containing protein 1	246	SLAESIDDALNCR	monophos-(246)SLAESIDDALNCR	1.7729e+06	2.42099e+06		4.32021e+06			1.69144e+06							176409			4	1	3	2	#DIV/0!	#DIV/0!	0.993284	0.192554
[truncated: 2,824 more rows]
