# Supplementary material for: Comparative Phosphoproteomic Profiling of Type III Adenylyl Cyclase Knockout and Control, Male, and Female Mice
Source: Front Cell Neurosci. 2019 Feb 13;13:34. doi: 10.3389/fncel.2019.00034 (PMC6381875; doi:10.3389/fncel.2019.00034)
Supplement: Supplementary file 4 [file Table_4.xlsx]

## Sheet: Sheet4
Supplemental Data 4: Phosphopeptides list of proteins associated with cAMP signaling pathway.
monophos-(155)SVELGLEER means the prosition before peptide SVELGLEER is 155, one phospho-group on this peptide.
Gene	Protein name	Uniport ID	Peptide	Detected times in KO	Detected times in WT	Detected times in F	Detected times in M	T-test (Peak area of KO vs WT)
Adcy5	Adenylate cyclase type 5	P84309	monophos-(155)SVELGLEER	1	0	0	1	#DIV/0!
Adcy9	Adenylate cyclase type 9	P51830	diphos-(604)GQGTASPGSVSDLAQTVK	7	7	6	8	0.919421
			monophos-(604)GQGTASPGSVSDLAQTVK	8	8	8	8	0.306199
			monophos-(1326)AIEKDSCEDIGVEEASELSK	0	1	0	1	#DIV/0!
Arpp21	cAMP-regulated phosphoprotein 21	Q9DCB4	monophos-(29)SESLDEEEKLELQR	7	5	8	4	0.202299
			monophos-(378)TASFGGITVLTR	5	6	6	5	0.667368
Cap1	Adenylyl cyclase-associated protein 1	P40124	monophos-(17)LEAVSHTSDMHCGYGDSPSK	3	4	5	2	0.504254
			monophos-(293)SGPKPFSAPKPQTSPSPKPATK	1	1	1	1	#DIV/0!
Cap2	Adenylyl cyclase-associated protein 2	Q9CYT6	monophos-(260)SALFAQLNQGEAITK	2	2	2	2	0.416289
			monophos-(293)AQGQIRSPTK	2	3	2	3	0.444599
			diphos-(299)SPTKTHTPSPTSPK	2	2	2	2	0.94627
			diphos-(303)THTPSPTSPKSNSPQK	6	5	7	4	0.85235
			monophos-(303)THTPSPTSPK	1	3	2	2	#DIV/0!
			monophos-(313)SNSPQKHTPVLELEGK	1	0	0	1	#DIV/0!
Gnal	Guanine nucleotide-binding protein G(olf) subunit alpha	Q8CGK7	monophos-(168)IDSVSLVDYTPTDQDLLR	1	0	0	1	#DIV/0!
			monophos-(188)VLTSGIFETR	1	0	0	1	#DIV/0!
Gnao1	Guanine nucleotide-binding protein G(o) subunit alpha	P18872	monophos-(21)NLKEDGISAAK	1	0	1	0	#DIV/0!
			monophos-(154)YYLDSLDR	1	2	2	1	#DIV/0!
			monophos-(198)LFDVGGQRSER	0	1	0	1	#DIV/0!
Gnb1	Guanine nucleotide-binding protein G(I)/G(S)/G(T) subunit beta-1	P62874	diphos-(219)QTFTGHESDINAICFFPNGNAFATGSDDATCR	1	1	2	0	#DIV/0!
Gng3	Guanine nucleotide-binding protein G(I)/G(S)/G(O) subunit gamma-3	P63216	diphos-(0)MKGETPVNSTMSIGQAR	7	7	6	8	0.60087
			monophos-(0)MKGETPVNSTMSIGQAR	3	3	3	3	0.654471
Hcn2	Potassium/sodium hyperpolarization-activated cyclic nucleotide-gated channel 2	O88703	monophos-(105)GAASGPSAAEEAGSEEAGPAGEPR	3	1	2	2	#DIV/0!
			diphos-(731)RAPPGPLPPAASPGPPAASPPAAPSSPR	3	3	4	2	0.302028
			monophos-(731)RAPPGPLPPAASPGPPAASPPAAPSSPR	0	1	1	0	#DIV/0!
			diphos-(762)TSPYGVPGSPATR	1	0	0	1	#DIV/0!
			diphos-(787)ASRPLSASQPSLPHGVPAPSPAASARPASSSTPR	0	1	0	1	#DIV/0!
			monophos-(838)DSASPGAASGLDPLDSAR	5	3	5	3	0.250689
Pde1b	Calcium/calmodulin-dependent 3',5'-cyclic nucleotide phosphodiesterase 1B	Q01065	diphos-(6)SPPEMLESDCPSPLELK	4	0	1	3	#DIV/0!
			monophos-(6)SPPEMLESDCPSPLELK	8	8	8	8	0.310318
			diphos-(454)SQPSFQWRQPSLDVDVGDPNPDVVSFR	1	0	1	0	#DIV/0!
			monophos-(462)QPSLDVDVGDPNPDVVSFR	8	8	8	8	0.92895
Pde2a	cGMP-dependent 3',5'-cyclic phosphodiesterase	Q922S4	monophos-(176)RPEAVQNTSVDASEDQKDEK	7	8	8	7	0.677925
			diphos-(881)GLPSNNSLDFLDEEYEVPDLDGTR	1	0	1	0	#DIV/0!
			monophos-(881)GLPSNNSLDFLDEEYEVPDLDGTR	6	7	7	6	0.882502
Pde4a	cAMP-specific 3',5'-cyclic phosphodiesterase 4A	O89084	monophos-(10)SLSLSLPGPR	6	6	6	6	0.205754
			monophos-(137)RESFLYR	7	2	4	5	0.909086
			monophos-(203)SPLGGPPSVCK	4	1	1	4	#DIV/0!
			monophos-(326)KLVHTGSLNINVPR	1	0	0	1	#DIV/0!
			monophos-(327)LVHTGSLNINVPR	4	2	3	3	0.713714
			diphos-(670)QSPSPTLEEEPGVLSDPALPDK	4	2	3	3	0.795602
			monophos-(783)TLSPSEEAQGLLGLPSMAAEVEAPR	5	4	4	5	0.0999001
Pde4c	cAMP-specific 3',5'-cyclic phosphodiesterase 4C	Q3UEI1	monophos-(118)RESFLYR	7	2	4	5	0.909086
Pde4d	cAMP-specific 3',5'-cyclic phosphodiesterase 4D	Q01063	monophos-(126)RESFLYR	7	2	4	5	0.909086
			diphos-(133)SDSDYDLSPK	4	3	2	5	0.541346
			monophos-(133)SDSDYDLSPK	8	7	8	7	0.807481
			monophos-(193)SPMCNQPSINK	2	1	1	2	#DIV/0!
			monophos-(308)LMHSSSLTNSCIPR	1	1	1	1	#DIV/0!
Pde7a	High affinity cAMP-specific 3',5'-cyclic phosphodiesterase 7A	P70453	monophos-(84)LLSFQR	4	3	4	3	0.956955
Pde7b	cAMP-specific 3',5'-cyclic phosphodiesterase 7B	Q9QXQ1	monophos-(42)RGSYPFIDFR	5	2	3	4	0.850577
			monophos-(71)LLSFQR	4	3	4	3	0.956955
			diphos-(423)RGSGQDLAGPAPETLEQTEGATP	1	0	0	1	#DIV/0!
			monophos-(423)RGSGQDLAGPAPETLEQTEGATP	4	4	4	4	0.371848
Ppp1r11	Protein phosphatase 1 regulatory subunit 11	Q8K1L5	diphos-(103)RPTTPAPTPTTPPQPPDPSQPPPGPMQH	4	3	4	3	0.479604
			monophos-(103)RPTTPAPTPTTPPQPPDPSQPPPGPMQH	3	3	4	2	0.286847
Ppp1r14a	Protein phosphatase 1 regulatory subunit 14A	Q91VC7	monophos-(19)ARGPGGSPSGLQK	0	4	2	2	#DIV/0!
			monophos-(67)ESDMPDEVNIDELLELDSEEER	0	1	1	0	#DIV/0!
			monophos-(116)GLHKQPGFPQPSPSDDPSLSPR	8	7	7	8	0.749826
Ppp1r16a	Protein phosphatase 1 regulatory subunit 16A	Q923M0	monophos-(363)EHAQEAIVWQQPPPTSPEPLEDEDRQTDAELR	0	1	1	0	#DIV/0!
Ppp1r1b	Protein phosphatase 1 regulatory subunit 1B	Q60829	diphos-(40)VSEHSSPEEEASPHQR	7	8	7	8	0.519335
			monophos-(40)VSEHSSPEEEASPHQR	8	8	8	8	0.616447
			diphos-(80)AVQHLQTISNLSENQASEEEDELGELR	1	0	1	0	#DIV/0!
			monophos-(80)AVQHLQTISNLSENQASEEEDELGELR	8	7	7	8	0.563707
			monophos-(107)ELGYPQEDDEEDEDEEEDEEEDSQAEVLK	4	4	4	4	0.181859
			monophos-(178)ATLSEPGEEPQHPSPP	8	8	8	8	0.804874
Ppp1r2	Protein phosphatase inhibitor 2	Q9DCL8	diphos-(68)IDEPNTPYHNMIGDDEDAYSDSEGNEVMTPDILAK	2	3	2	3	0.512671
			monophos-(68)IDEPNTPYHNMIGDDEDAYSDSEGNEVMTPDILAK	3	4	3	4	0.850244
			diphos-(116)TREQESSGEEDNDLSPEER	2	3	3	2	0.597535
			monophos-(116)TREQESSGEEDNDLSPEER	1	0	1	0	#DIV/0!
Ppp1r3g	Protein phosphatase 1 regulatory subunit 3G	Q9CW07	monophos-(78)SFSLPADPILQAAK	8	8	8	8	0.916919
Ppp1r7	Protein phosphatase 1 regulatory subunit 7	Q3UM45	monophos-(5)GAGQQQSQEMMEVDR	7	7	7	7	0.951718
			diphos-(20)RVESEESGDEEGK	2	1	3	0	#DIV/0!
			diphos-(34)HGGGGIVANLSEQSLKDGVDR	8	8	8	8	0.92874
			monophos-(34)HGGGGIVANLSEQSLKDGVDR	6	7	7	6	0.297494
			monophos-(322)SLETVYLER	1	0	1	0	#DIV/0!
Ppp1r9b	Neurabin-2	Q6R891	monophos-(97)ASSLNENVDHSALLK	1	1	0	2	#DIV/0!
Ppp3ca	Serine/threonine-protein phosphatase 2B catalytic subunit alpha isoform	P63328	monophos-(217)FKEPPAYGPMCDILWSDPLEDFGNEK	1	0	0	1	#DIV/0!
			monophos-(408)VFSVLR	3	3	3	3	0.0648648
			monophos-(441)QTLQSATVEAIEADEAIKGFSPQHK	7	7	6	8	0.664844
			monophos-(466)ITSFEEAKGLDR	8	8	8	8	0.98631
			monophos-(487)DAMPSDANLNSINK	2	3	4	1	0.441132
			monophos-(501)ALASETNGTDSNGSNSSNIQ	0	1	0	1	#DIV/0!
Ppp3cb	Serine/threonine-protein phosphatase 2B catalytic subunit beta isoform	P48453	monophos-(418)VFSVLR	3	3	3	3	0.0648648
			monophos-(469)GFSPPHR	5	4	5	4	0.786118
			monophos-(476)ICSFEEAKGLDR	8	7	7	8	0.884221
Ppp3cc	Serine/threonine-protein phosphatase 2B catalytic subunit gamma isoform	P48455	monophos-(459)IRSFEEAR	1	0	0	1	#DIV/0!
Ppp4r4	Serine/threonine-protein phosphatase 4 regulatory subunit 4	Q8C0Y0	monophos-(774)SQSFNNQAFHAK	0	1	0	1	#DIV/0!
Ppp6r2	Serine/threonine-protein phosphatase 6 regulatory subunit 2	Q8R3Q2	monophos-(660)NVPGLAAPSSPTQK	8	8	8	8	0.202424
			monophos-(743)CSSPVDMDHSNAEGGQSPGPEK	1	1	2	0	#DIV/0!
Ppp6r3	Serine/threonine-protein phosphatase 6 regulatory subunit 3	Q922D4	monophos-(579)IQQFDDGGSDEEDIWEEK	8	8	8	8	0.935131
			diphos-(759)VTETVMNGGMKETLSLTVDAK	0	1	0	1	#DIV/0!
Prkaa1	5'-AMP-activated protein kinase catalytic subunit alpha-1	Q5EG47	diphos-(475)SIDDEITEAKSGTATPQR	1	0	0	1	#DIV/0!
Prkab1	5'-AMP-activated protein kinase subunit beta-1	Q9R078	monophos-(107)SQNNFVAILDLPEGEHQYK	7	5	5	7	0.450803
			monophos-(172)CSDVSELSSSPPGPYHQEPYMSKPEER	1	1	2	0	#DIV/0!
Prkab2	5'-AMP-activated protein kinase subunit beta-2	Q6PAM0	monophos-(33)IMVGSTDDPSVFSLPDSK	8	8	8	8	0.597147
			monophos-(106)SHNDFVAILDLPEGEHQYK	2	0	1	1	#DIV/0!
			diphos-(166)LDSMESSETSCRDLSSSPPGPYGQEMYVFR	0	1	0	1	#DIV/0!
			monophos-(178)DLSSSPPGPYGQEMYVFR	8	8	8	8	0.886614
Prkaca	cAMP-dependent protein kinase catalytic subunit alpha	P05132	monophos-(195)TWTLCGTPEYLAPEIILSK	2	0	2	0	#DIV/0!
			monophos-(320)GPGDTSNFDDYEEEEIRVSINEK	1	0	1	0	#DIV/0!
Prkacb	cAMP-dependent protein kinase catalytic subunit beta	P68181	monophos-(195)TWTLCGTPEYLAPEIILSK	2	0	2	0	#DIV/0!
			monophos-(320)GSGDTSNFDDYEEEEIRVSITEK	1	0	1	0	#DIV/0!
Prkag2	5'-AMP-activated protein kinase subunit gamma-2	Q91WG5	diphos-(154)KTSSVSSSPSTPTQVTK	1	0	1	0	#DIV/0!
			monophos-(190)IYASSSPPDTGQR	2	3	3	2	0.287485
Prkar1a	cAMP-dependent protein kinase type I-alpha regulatory subunit	Q9DBC7	diphos-(74)TDSREDEISPPPPNPVVK	8	8	8	8	0.9595
			monophos-(74)TDSREDEISPPPPNPVVK	8	8	8	8	0.977357
			monophos-(78)EDEISPPPPNPVVK	2	2	2	2	0.152435
Prkar1b	cAMP-dependent protein kinase type I-beta regulatory subunit	P12849	diphos-(68)QKSNSQCDSHDEEISPTPPNPVVK	1	1	2	0	#DIV/0!
			diphos-(70)SNSQCDSHDEEISPTPPNPVVK	5	6	6	5	0.597442
			monophos-(70)SNSQCDSHDEEISPTPPNPVVK	4	3	6	1	0.31968
Prkar2a	cAMP-dependent protein kinase type II-alpha regulatory subunit	P12367	diphos-(43)RQESDTFIVSPTTFHTQESSAVPVIEEDGESDSDSEDADLEVPVPSK	1	1	2	0	#DIV/0!
			monophos-(93)RVSVCAETFNPDEEEEDNDPR	8	8	8	8	0.240864
			monophos-(187)DNQTRSVGQYDNR	1	1	2	0	#DIV/0!
			monophos-(377)NISHYEEQLVK	0	1	1	0	#DIV/0!
			monophos-(388)MFGSNLDLMDPGQ	8	8	8	8	0.624777
Prkar2b	cAMP-dependent protein kinase type II-beta regulatory subunit	P31324	diphos-(72)GVNFAEEPMRSDSENGEEEEAAEAGAFNAPVINR	2	4	3	3	0.362771
			monophos-(72)GVNFAEEPMRSDSENGEEEEAAEAGAFNAPVINR	4	4	5	3	0.417244
			monophos-(109)RASVCAEAYNPDEEEDDAESR	8	8	8	8	0.660669
Rgs6	Regulator of G-protein signaling 6	Q9Z2H2	monophos-(230)KSVYGVTDETQSQSPVHIPSQPIR	7	7	7	7	0.429722
			monophos-(231)SVYGVTDETQSQSPVHIPSQPIR	8	8	8	8	0.968473
Rgs7	Regulator of G-protein signaling 7	O54829	monophos-(228)SVYGLQNDIR	7	8	7	8	0.744472
			diphos-(238)SHSPTHTPTPETKPPTEDELHQQIK	7	7	7	7	0.706091
			monophos-(238)SHSPTHTPTPETKPPTEDELHQQIK	8	8	8	8	0.431944
Rgs8	Regulator of G-protein signaling 8	Q8BXT1	monophos-(23)SDSCSDFTAILPDKPNR	2	1	2	1	#DIV/0!
Rgs10	Regulator of G-protein signaling 10	Q9CQE5	monophos-(37)WASSLENLLEDPEGVQR	1	1	2	0	#DIV/0!
Rgs14	Regulator of G-protein signaling 14	P97492	monophos-(176)SPLYQECLLAEAEGRPLREPGSSHLGSPDTAR	2	0	0	2	#DIV/0!
			monophos-(194)EPGSSHLGSPDTAR	0	1	1	0	#DIV/0!
			monophos-(287)KSLGSGESESESRPGK	7	8	7	8	0.818659
Rgs19	Regulator of G-protein signaling 19	Q9CX84	monophos-(66)LQPLPSCEVCTPPSPK	0	1	1	0	#DIV/0!
